# Supplementary material for: Support effect on Ni-based mono- and bimetallic catalysts in CO2 hydrogenation
Source: Royal Society of Chemistry journal article supplement (doi:10.1039/d4nr02025a), 2024-01-01
Supplement: d4nr02025a1.xlsx [file d4nr02025a1.xlsx]

## Sheet: Figure1a
Figure 1. a H2-TPR profile for Ni,Fe monometallic and bimetallic catalysts supported on MgO and b their PXRD patterns after isothermal reduction of 450 C.
Temp	TCD	Temp	TCD	Temp	TCD	Temp	TCD	Temp	TCD	Temp	TCD
	Ni_MgO		17Fe83Ni_MgO		33Fe66Ni_MgO		50Fe50Ni_MgO		66Fe33Ni_MgO		Fe_MgO
80	2.141	80	5.8782	80	2.1374	80	6.0928	80.1	2.7716	80	13.2561
80.1	1.9646	80.1	5.7948	80.1	2.0218	80.1	6.2418	80.1	2.0969	80.1	13.1309
80.2	2.687	80.1	3.9589	80.2	1.7512	80.1	5.8627	80.2	2.6453	80.1	12.2845
80.3	1.7619	80.3	5.0116	80.3	2.259	80.2	4.1485	80.3	2.2912	80.3	12.3894
80.4	1.7118	80.4	3.9101	80.4	0.7319	80.3	5.306	80.4	2.0337	80.4	12.0306
80.5	1.2147	80.5	3.6442	80.5	0.9453	80.4	2.6286	80.5	1.4198	80.5	11.1473
80.6	0.7105	80.6	3.3402	80.6	1.055	80.5	4.704	80.6	2.6441	80.6	11.7171
80.7	0.273	80.7	3.0947	80.7	0.906	80.6	4.6098	80.7	2.4199	80.7	10.8266
80.8	0.5376	80.8	2.8276	80.9	0.7188	80.7	4.7421	80.9	2.0194	80.8	12.2702
81	-0.0048	80.9	3.0172	81	-0.4089	80.9	4.4835	81	2.5666	80.9	11.5991
81.1	-0.5269	81	2.8539	81.1	0.0882	81	5.0426	81.1	2.1625	81.1	11.5192
81.2	-1.1623	81.2	3.2532	81.2	0.7248	81.1	5.5182	81.2	2.8431	81.2	12.8317
81.3	-0.9847	81.3	3.3927	81.3	0.6855	81.2	5.0843	81.3	2.6417	81.3	12.1284
81.4	-0.999	81.4	4.2701	81.4	1.3185	81.3	6.7425	81.4	2.6703	81.4	12.4395
81.5	-1.291	81.5	2.7108	81.6	0.8249	81.4	5.5623	81.5	2.4259	81.5	12.6624
81.7	-0.7915	81.6	3.7122	81.7	1.353	81.5	7.6425	81.6	2.4366	81.6	13.0439
81.8	0.2337	81.7	4.2927	81.8	1.6558	81.7	6.3229	81.8	3.6347	81.7	13.8283
81.9	0.7761	81.8	4.1032	81.9	2.5558	81.7	7.1597	81.9	3.19	81.8	12.5349
82	0.8249	81.9	4.8053	82	2.6369	81.9	7.0095	82	3.0446	82	13.1238
82.1	1.0943	82.1	5.0902	82.2	2.7764	82	5.8401	82.1	2.5618	82.1	12.8865
82.2	2.3568	82.2	5.2047	82.3	2.4712	82.1	5.5087	82.2	2.2292	82.2	12.3179
82.3	1.961	82.3	6.6185	82.4	3.1543	82.2	6.6328	82.3	2.2829	82.3	13.1214
82.5	2.8336	82.4	5.6314	82.5	2.1565	82.3	6.0248	82.4	1.3101	82.4	12.5599
82.6	1.7893	82.5	6.7031	82.6	2.3592	82.4	6.4313	82.5	0.7963	82.5	11.7338
82.7	2.8336	82.6	5.6219	82.7	2.1553	82.5	5.7817	82.6	1.4234	82.6	12.0246
82.8	1.9073	82.8	6.5672	82.8	2.2244	82.7	4.7076	82.7	0.608	82.8	12.5539
82.9	2.9707	82.9	6.3503	82.9	2.0981	82.8	4.6945	82.9	0.3278	82.9	12.0509
83	2.3901	83	5.4491	83	1.4281	82.9	5.1796	83	0.0238	83	11.4596
83.1	2.2638	83.1	5.5015	83.2	1.955	83	5.2583	83.1	0.0012	83.1	11.0781
83.3	2.2233	83.2	6.4552	83.3	2.2662	83.1	4.0042	83.2	-0.0405	83.2	11.6658
83.4	2.7502	83.3	5.6887	83.4	2.4724	83.2	4.8161	83.3	-0.3624	83.3	11.6599
83.5	2.0111	83.5	6.5076	83.5	2.5129	83.3	5.9438	83.4	-0.0012	83.4	10.3414
83.6	2.2912	83.6	6.3157	83.6	2.1839	83.4	4.9567	83.5	0.1395	83.6	11.8244
83.7	1.9419	83.7	6.2597	83.7	2.4807	83.5	5.3823	83.6	0.3195	83.7	10.9816
83.8	2.1684	83.8	7.1538	83.9	3.4118	83.7	7.0071	83.7	0.2432	83.8	11.7004
84	1.4365	83.9	7.1311	84	2.085	83.8	6.3634	83.9	0.7391	83.9	11.2021
84.1	1.8096	84	7.0608	84.1	2.3806	83.9	6.9666	84	1.1778	84	11.1878
84.1	0.4089	84.1	10.2675	84.1	2.6524	84	6.4218	84.1	1.3232	84.1	11.642
84.2	0.6425	84.2	6.2656	84.2	2.4879	84.1	6.5339	84.1	1.2934	84.1	11.6277
84.3	0.3195	84.3	9.9552	84.4	2.9516	84.1	6.5899	84.2	1.4853	84.2	11.0817
84.4	0.7379	84.4	7.9525	84.5	2.0134	84.2	4.9567	84.4	1.4865	84.4	10.8683
84.6	0.4923	84.5	7.6938	84.6	2.4605	84.4	6.1941	84.5	1.5032	84.5	11.4799
84.6	0.5448	84.6	8.5628	84.7	2.0695	84.5	5.1451	84.6	1.9395	84.6	11.2879
84.8	-0.2849	84.7	7.7999	84.8	2.0313	84.6	4.7874	84.7	1.651	84.7	10.7396
84.9	0.5436	84.8	7.3946	84.9	2.0409	84.7	5.4646	84.8	2.3043	84.8	11.4572
85	0.1514	84.9	8.3375	85.1	1.0657	84.8	4.1747	84.9	1.3423	84.9	11.636
85.1	0.5734	85.1	7.8368	85.2	0.9882	84.9	5.4097	85	0.9716	85.1	13.0081
85.2	0.2789	85.2	8.2338	85.3	0.0131	85.1	5.7042	85.1	1.7285	85.2	12.4872
85.3	0.1848	85.3	7.0822	85.4	-0.0429	85.2	6.0439	85.3	2.3425	85.3	12.387
85.5	-0.6032	85.4	7.5507	85.5	0.3409	85.3	4.3488	85.4	2.8145	85.4	13.1178
85.6	0.0429	85.5	6.3431	85.6	-0.0095	85.4	5.8353	85.5	2.4652	85.5	15.4758
85.7	1.0455	85.6	6.7997	85.8	0.1788	85.5	4.2737	85.6	3.3355	85.6	15.5866
85.8	-0.0215	85.7	6.5947	85.9	-1.1206	85.6	5.2607	85.7	2.3293	85.7	16.0813
85.9	-0.2456	85.9	5.8723	86	0.2468	85.7	4.4489	85.8	2.5392	85.9	16.3817
86	0.9608	86	6.1381	86.1	-0.2432	85.8	3.7789	86	2.8336	86	15.924
86.2	0.416	86.1	5.877	86.2	-0.0989	86	4.0758	86.1	3.159	86.1	16.2697
86.3	0.5651	86.2	4.9436	86.3	0.366	86.1	2.9659	86.2	2.5821	86.2	16.5403
86.4	0.6652	86.3	5.9581	86.5	1.1349	86.2	3.2389	86.3	2.7001	86.3	16.5427
86.5	0.8011	86.4	5.908	86.6	1.2815	86.3	3.2556	86.4	2.2423	86.4	16.3734
86.6	1.3471	86.6	5.8639	86.7	2.1029	86.4	3.0088	86.6	3.0136	86.5	16.439
86.7	0.8571	86.7	5.945	86.8	2.2554	86.5	1.7476	86.7	2.4068	86.6	15.8703
86.8	1.3769	86.8	4.4036	86.9	2.0373	86.6	3.3808	86.8	2.6488	86.8	15.7392
87	1.2398	86.9	4.7767	87	2.8419	86.8	3.1281	86.9	2.7025	86.9	14.9
87.1	1.2565	87	4.4298	87.2	3.37	86.9	3.4726	87	1.8406	87	15.1217
87.2	1.6868	87.1	3.264	87.3	2.1338	87	2.9981	87.1	2.3055	87.1	14.2038
87.3	1.1528	87.3	3.8838	87.4	2.5117	87.1	3.978	87.2	1.6069	87.2	14.6139
87.4	1.4889	87.4	2.7299	87.5	1.9956	87.2	4.0555	87.4	1.3673	87.4	14.2956
87.5	1.992	87.5	2.867	87.6	1.9026	87.3	5.5432	87.5	0.5078	87.5	14.5793
87.7	0.9739	87.6	2.3961	87.8	1.8072	87.4	6.144	87.6	1.6296	87.6	13.876
87.8	0.9489	87.7	1.986	87.9	1.0204	87.6	5.0616	87.7	0.6652	87.7	15.4257
87.9	1.8489	87.8	1.9956	88	1.0276	87.7	7.6962	87.8	0.9298	87.8	15.0931
88	0.8047	87.9	2.3413	88.1	1.8597	87.8	8.868	87.9	0.5007	87.9	15.0526
88.1	1.3745	88.1	1.9073	88.1	1.1861	87.9	8.0419	88.1	0.9918	88	16.1684
88.2	1.2004	88.1	2.619	88.2	1.725	88	8.6117	88.1	0.4017	88.1	15.6522
88.3	0.8261	88.2	2.079	88.3	1.6952	88.1	9.0194	88.2	0.1299	88.2	15.564
88.4	1.4734	88.3	2.8622	88.5	2.3258	88.1	9.9111	88.3	0.0012	88.3	16.0491
88.5	1.3196	88.4	3.0863	88.6	3.3426	88.2	9.7156	88.4	0.2384	88.4	15.5485
88.6	0.5245	88.5	2.5904	88.7	2.4569	88.4	9.7632	88.5	-0.0656	88.5	15.8811
88.7	1.1837	88.7	2.9957	88.8	2.9802	88.5	8.0037	88.6	0.385	88.7	13.4468
88.8	1.3959	88.8	3.2139	88.9	3.3593	88.6	7.0071	88.8	0.5949	88.8	15.6617
89	1.6963	88.9	3.4475	89.1	2.7835	88.7	7.6008	88.9	0.0978	88.9	13.7067
89.1	2.0993	89	3.5131	89.2	2.9254	88.8	8.0597	89	-0.1752	89	14.6854
89.2	2.2817	89.1	3.4571	89.3	3.5	89	7.1919	89.1	0.2789	89.1	14.5352
89.3	2.0289	89.2	4.1115	89.4	2.2173	89.1	7.3195	89.2	-0.4709	89.2	14.5948
89.4	2.8014	89.4	3.9375	89.5	3.2043	89.2	6.9642	89.3	0.2182	89.4	14.0095
89.6	3.5286	89.5	4.5037	89.7	3.9148	89.3	6.0809	89.4	0.8857	89.5	14.0667
89.7	4.3476	89.6	4.288	89.8	2.8133	89.4	7.3946	89.5	1.1265	89.6	12.9008
89.8	4.2248	89.7	4.7517	89.9	2.8944	89.5	7.5924	89.7	1.2338	89.7	13.3777
89.9	4.5836	89.8	5.2249	90	2.7275	89.6	6.727	89.8	1.3411	89.8	13.2644
90	4.2129	90	5.4872	90.1	3.4273	89.7	7.7116	89.9	1.8978	89.9	13.9892
90.2	4.1199	90.1	5.2989	90.2	2.6274	89.9	8.0121	90	1.3995	90.1	13.7031
90.2	4.6134	90.2	5.4896	90.4	3.2127	90	8.4949	90.1	1.384	90.2	13.8605
90.4	4.4215	90.3	5.6744	90.5	3.1245	90.1	8.4317	90.3	1.8525	90.3	12.9342
90.5	4.9627	90.4	5.6958	90.6	2.9814	90.2	7.3397	90.4	1.2267	90.4	14.3361
90.6	4.6551	90.5	5.6231	90.7	2.7037	90.3	8.8811	90.5	1.0371	90.5	13.6316
90.7	4.0591	90.7	6.2358	90.8	1.415	90.5	8.2541	90.6	1.179	90.7	14.4923
90.9	3.6621	90.8	6.3443	91	2.2495	90.5	8.4221	90.7	0.7224	90.8	13.3681
91	3.7932	90.9	6.7103	91.1	1.837	90.7	8.2457	90.8	0.3612	90.9	14.7712
91.1	3.4058	91	6.696	91.2	0.8643	90.8	7.8762	90.9	0.1109	91	14.1239
91.2	3.283	91.1	6.7043	91.3	1.9538	90.9	8.3196	91	0.0739	91.1	13.9534
91.3	3.1936	91.3	6.6566	91.4	1.8466	91	6.7151	91.2	-0.087	91.3	14.3909
91.5	3.134	91.4	7.0643	91.5	1.4186	91.1	6.7163	91.3	-0.1585	91.4	14.683
91.6	2.8884	91.5	6.6543	91.7	1.6177	91.3	8.5545	91.4	-0.3028	91.5	13.9678
91.7	3.3247	91.6	6.8057	91.8	1.0574	91.4	6.7306	91.5	-0.1287	91.6	14.0142
91.8	2.2006	91.7	7.5889	91.9	1.6916	91.5	7.5006	91.6	-0.0513	91.7	13.299
91.9	2.6929	91.8	7.3409	92	1.9062	91.6	7.4422	91.7	0.1669	91.8	14.3766
92	3.2651	92	7.1394	92.1	2.2793	91.7	7.8917	91.9	0.5329	92	13.8223
92.1	3.1018	92.1	7.7784	92.2	1.0979	91.8	7.112	92	0.5674	92.1	13.8485
92.2	2.1935	92.1	7.0596	92.3	1.7822	91.9	8.6069	92.1	0.3242	92.1	13.4766
92.3	2.3353	92.2	7.4625	92.4	1.9908	92.1	8.7631	92.1	0.8607	92.2	12.5885
92.4	3.1495	92.3	7.2241	92.5	1.3101	92.1	7.0858	92.2	1.1778	92.3	12.8603
92.5	2.836	92.4	7.0596	92.7	1.7118	92.2	8.9729	92.3	1.6248	92.4	14.087
92.6	2.1851	92.6	7.3516	92.8	1.2517	92.3	8.9145	92.5	1.5283	92.5	13.0248
92.8	1.775	92.7	6.6924	92.9	1.2398	92.4	7.7927	92.6	1.8859	92.7	12.4741
92.9	2.5523	92.8	6.6447	93	0.1228	92.5	8.5831	92.7	1.7273	92.8	11.7862
93	2.2101	92.9	6.4349	93.1	1.5199	92.6	8.0538	92.8	2.3377	92.9	12.9581
93.1	1.5509	93	6.1274	93.2	0.6688	92.7	7.9966	92.9	2.1899	93	11.9221
93.2	1.3268	93.1	6.7008	93.4	0.7272	92.9	7.993	93	1.6344	93.1	12.6565
93.4	2.5725	93.3	6.2037	93.5	0.9727	93	7.7403	93.2	1.229	93.3	13.0522
93.5	1.9145	93.4	6.3682	93.6	1.5759	93.1	7.7212	93.3	1.6379	93.4	13.0653
93.6	1.9813	93.5	6.206	93.8	1.39	93.2	8.2326	93.4	2.1124	93.5	12.4836
93.7	2.5654	93.6	5.8067	93.8	1.8644	93.3	7.5567	93.5	0.726	93.6	13.5207
93.8	2.1112	93.7	6.1846	94	1.6451	93.4	7.5221	93.6	-0.0465	93.7	13.7675
93.9	2.4402	93.8	5.908	94.1	2.1636	93.6	5.7495	93.8	0.7153	93.9	13.6995
94.1	2.5332	94	5.7185	94.2	1.4973	93.7	5.2488	93.8	0.5305	94	15.0692
94.2	2.8765	94.1	6.1846	94.3	2.8002	93.8	5.9068	94	1.0288	94.1	14.3766
94.3	2.6155	94.3	6.1393	94.4	2.9719	93.9	5.4014	94.1	1.0157	94.2	14.9572
94.4	3.1698	94.3	6.3372	94.6	2.0278	94	5.3036	94.2	1.775	94.3	15.1408
94.5	2.383	94.5	5.8603	94.7	3.5048	94.2	4.3154	94.3	1.9574	94.4	14.9131
94.6	2.1267	94.6	6.2585	94.8	2.5046	94.3	4.7874	94.5	1.0431	94.6	15.5151
94.8	2.135	94.7	6.299	94.9	2.476	94.4	3.9434	94.6	1.9896	94.7	15.6093
94.9	1.5986	94.8	6.268	95	2.7502	94.5	3.6526	94.7	1.8466	94.8	15.0442
95	2.6751	94.9	6.5887	95.1	2.7049	94.6	4.3952	94.8	2.3603	94.9	15.0716
95.1	2.4712	95	6.3646	95.3	2.0742	94.7	2.178	94.9	1.5843	95	15.0955
95.3	2.1064	95.1	6.4242	95.4	2.1803	94.8	4.214	95	1.7309	95.1	15.6951
95.4	2.2352	95.3	6.6352	95.5	2.7418	95	3.264	95.1	1.4889	95.2	15.136
95.5	3.494	95.4	6.5458	95.6	1.9372	95.1	3.6013	95.3	1.6236	95.4	14.9632
95.6	2.7025	95.5	6.7949	95.7	3.0184	95.2	5.5242	95.4	1.955	95.5	15.8596
95.7	2.4831	95.6	6.6006	95.9	2.1398	95.3	4.5896	95.5	1.4579	95.6	16.0527
95.9	2.7072	95.7	6.6459	96	2.0111	95.4	4.0209	95.6	1.2088	95.7	16.2554
96	2.4414	95.8	6.7031	96.1	2.0969	95.6	5.182	95.7	1.1981	95.9	16.6202
96.1	2.867	96	6.8128	96.1	2.6226	95.7	5.5385	95.8	1.1849	96	17.0338
96.1	3.165	96.1	6.7449	96.2	2.9564	95.8	6.4087	95.9	0.3684	96.1	17.3104
96.2	3.2079	96.1	6.4266	96.3	2.836	95.9	6.7759	96.1	1.3781	96.1	16.65
96.3	4.0245	96.2	6.5804	96.5	3.7336	96	6.4671	96.1	1.0216	96.2	17.302
96.5	2.7716	96.3	6.6185	96.6	2.6047	96.1	6.1369	96.2	1.1516	96.3	17.9327
96.6	2.8932	96.5	6.5875	96.7	4.0615	96.2	7.2742	96.3	1.3387	96.4	18.3761
96.7	3.5548	96.6	6.0141	96.8	3.5203	96.3	8.1909	96.4	1.03	96.6	17.5512
96.8	3.4773	96.7	5.9521	97	3.2651	96.4	7.453	96.5	1.2338	96.7	18.7218
96.9	3.2794	96.8	5.7471	97.1	4.1163	96.5	6.0594	96.6	1.4424	96.8	18.0507
97	3.7384	96.9	5.4443	97.2	3.1185	96.6	6.7329	96.8	1.6785	96.9	17.2853
97.1	2.9123	97	5.7971	97.3	2.8324	96.7	6.5851	96.9	1.6963	97	18.3272
97.3	3.0136	97.2	4.7088	97.4	4.1163	96.9	6.2191	97	1.2922	97.1	17.7264
97.4	2.9707	97.3	5.1939	97.5	4.4894	97	6.3753	97.1	1.291	97.3	15.6868
97.5	3.5036	97.4	5.7042	97.7	4.0722	97.1	5.7364	97.2	1.4246	97.4	17.1006
97.6	2.7382	97.5	5.6398	97.8	3.8803	97.2	6.7711	97.4	0.7093	97.5	16.762
97.7	2.7311	97.6	5.4324	97.9	3.1459	97.3	6.777	97.5	1.4913	97.6	16.6631
97.9	2.9111	97.7	5.7578	98	3.9017	97.5	7.3826	97.6	0.8047	97.8	16.4139
98	3.6645	97.9	5.7852	98.1	2.8479	97.6	7.8785	97.7	0.8035	97.9	14.0071
98.1	3.1281	98	5.6148	98.2	3.7646	97.7	7.4387	97.8	0.7629	98	16.8252
98.2	2.1505	98.1	5.6589	98.4	3.8481	97.8	7.6389	98	-0.4816	98.1	15.0585
98.3	2.9874	98.2	5.9557	98.5	2.4962	97.9	8.148	98.1	0.6354	98.2	15.533
98.5	2.7215	98.3	6.0296	98.6	2.6143	98.1	7.5614	98.2	0.6211	98.3	15.8417
98.6	1.9753	98.4	5.765	98.7	3.0541	98.1	8.2719	98.3	0.7665	98.5	15.0204
98.7	1.6165	98.6	6.386	98.9	1.9407	98.3	8.2028	98.4	0.9203	98.6	15.3089
98.8	1.5593	98.7	6.1488	99	2.563	98.4	7.199	98.6	0.0322	98.7	16.0837
98.9	1.5879	98.8	6.1107	99.1	2.7478	98.5	7.4327	98.7	1.39	98.8	16.3269
99	1.7917	98.9	6.3479	99.2	2.3949	98.6	7.5889	98.8	1.4842	98.9	16.5403
99.2	1.1063	99	6.0976	99.3	2.3365	98.7	5.9927	98.9	2.2709	99	16.3829
99.3	1.1027	99.1	6.4814	99.5	2.5439	98.9	7.6795	99	2.1398	99.2	16.0587
99.4	1.1027	99.3	6.2251	99.6	3.0863	99	6.5589	99.1	2.4593	99.3	16.1159
99.5	0.4768	99.4	6.3527	99.7	2.9063	99.1	6.0856	99.3	2.9194	99.4	15.0371
99.6	1.0538	99.5	6.2954	99.8	2.0683	99.2	5.5242	99.4	3.4142	99.5	15.4722
99.8	0.6258	99.6	6.1452	99.9	3.0601	99.3	5.5408	99.5	3.9816	99.6	14.8094
99.9	0.5949	99.8	6.1798	100.1	3.0565	99.4	6.0582	99.6	3.7456	99.8	14.1263
100	1.3614	99.9	6.0773	100.2	3.8505	99.6	5.3489	99.7	4.251	99.9	14.7343
100.1	1.0097	100	6.0892	100.3	2.8229	99.7	5.0521	99.8	3.8934	100	13.9415
100.2	1.508	100.1	6.6435	100.4	3.2282	99.8	4.2188	100	4.7612	100.1	14.2682
100.4	1.924	100.2	6.2263	100.5	3.1269	99.9	3.9613	100.1	4.6992	100.2	13.9475
100.5	1.7798	100.3	6.3694	100.7	2.8002	100	6.8414	100.2	4.4596	100.4	13.7866
100.6	1.6773	100.5	6.4421	100.8	3.3689	100.1	6.3896	100.3	4.0901	100.5	13.7734
100.7	1.9193	100.6	6.5339	100.9	2.3532	100.3	8.1718	100.4	4.5931	100.6	14.4863
100.8	2.9945	100.7	6.5625	101	2.4962	100.4	8.4448	100.6	4.425	100.7	14.2002
100.9	1.8966	100.8	6.7961	101.1	3.0458	100.5	9.0206	100.7	4.5085	100.8	15.3196
101.1	2.2256	100.9	6.7079	101.2	2.0397	100.6	10.078	100.8	4.0519	100.9	16.0134
101.1	2.5702	101	7.0357	101.3	2.9325	100.8	11.0495	100.9	3.0053	101.1	16.0253
101.2	2.228	101.1	6.7854	101.4	4.6492	100.9	9.9731	101	2.7585	101.1	16.4378
101.3	2.3723	101.2	6.7759	101.5	4.3166	101	10.6251	101.1	2.5833	101.2	16.3162
101.4	2.1386	101.3	6.3908	101.6	4.4155	101.1	9.9242	101.2	3.3772	101.3	17.1018
101.6	1.6153	101.4	6.5517	101.8	5.6708	101.1	11.059	101.3	3.0363	101.4	16.7763
101.7	1.4627	101.6	5.6446	101.9	4.7743	101.2	9.7942	101.4	2.4402	101.6	16.582
101.8	1.2767	101.7	6.2978	102	5.6303	101.3	8.98	101.5	2.5296	101.7	15.8274
101.9	1.5652	101.8	5.4419	102.1	5.1355	101.5	9.402	101.6	2.5499	101.8	16.4986
102	1.8537	101.9	5.4717	102.2	4.797	101.6	7.9739	101.7	2.5058	101.9	15.5056
102.2	1.3041	102	5.6219	102.3	5.5552	101.7	8.1062	101.9	1.8954	102.1	16.9671
102.3	1.6356	102.2	6.1345	102.4	5.3358	101.8	9.8908	102	1.5032	102.2	15.8
102.4	2.3329	102.3	5.7232	102.6	5.0461	101.9	8.1134	102.1	1.7822	102.3	15.6021
102.5	3.0684	102.4	5.7888	102.7	4.9222	102.1	10.1995	102.2	1.4317	102.4	16.8657
102.6	3.7587	102.5	5.8258	102.8	3.8815	102.2	10.7801	102.3	1.0157	102.5	16.0551
102.8	3.32	102.6	6.566	103	4.4882	102.3	10.1733	102.5	1.1921	102.7	16.9528
102.9	3.581	102.7	6.4445	103.1	4.3368	102.4	10.8004	102.6	1.4055	102.8	14.9477
103	4.3952	102.9	6.8438	103.2	4.214	102.5	11.2164	102.7	0.7188	102.9	16.6619
103.1	4.5192	103	6.4576	103.3	4.9114	102.6	11.8351	102.8	0.6068	103	16.7358
103.2	4.1115	103.1	6.3777	103.4	3.6299	102.8	11.6158	102.9	0.7367	103.1	17.8313
103.4	3.897	103.2	6.4969	103.5	4.7493	102.9	12.0485	103	0.7164	103.3	17.0553
103.5	3.0327	103.3	6.2287	103.7	4.5621	103	11.2462	103.2	0.3171	103.4	16.588
103.6	4.6396	103.5	6.87	103.8	4.0197	103.1	11.7683	103.3	1.353	103.5	16.4938
103.7	3.9506	103.6	7.6592	103.9	5.2416	103.2	12.4252	103.4	0.6139	103.6	15.8036
103.9	4.1544	103.7	6.8378	104	3.9947	103.4	11.3177	103.5	0.7033	103.7	17.606
104	4.4751	103.8	7.4089	104.1	4.8459	103.5	10.3807	103.6	1.5903	103.8	17.1137
104.1	3.9589	103.9	6.5029	104.3	5.0163	103.6	10.339	103.7	1.5676	103.9	17.3485
104.2	3.3283	104.1	6.7759	104.4	3.5882	103.7	10.246	103.9	1.6201	104.1	15.0669
104.3	3.8552	104.2	7.2753	104.5	5.7721	103.8	10.2854	104	2.83	104.2	16.2888
104.4	4.4346	104.3	6.7008	104.6	3.8958	104	9.5665	104.1	2.4164	104.3	17.0982
104.6	4.1103	104.4	6.4826	104.7	4.1306	104.1	8.1682	104.2	2.4712	104.4	16.7286
104.7	3.6514	104.5	6.4826	104.9	5.5766	104.2	8.9502	104.3	3.4106	104.5	15.4519
104.8	3.9577	104.7	6.181	105	3.8421	104.3	7.9298	104.5	2.4211	104.7	16.1374
104.9	4.8494	104.8	6.2716	105.1	5.1713	104.4	6.8045	104.6	4.0603	104.8	15.2779
105	4.0364	104.9	5.1808	105.2	4.4024	104.6	7.1466	104.7	3.5858	104.9	15.62
105.2	5.0509	105	5.1081	105.3	3.2353	104.7	6.6781	104.8	3.1626	105	15.5365
105.3	4.493	105.1	5.4932	105.5	4.1306	104.8	6.4266	104.9	3.4833	105.1	14.1442
105.4	4.5407	105.2	6.7139	105.6	2.8944	104.9	6.4051	105.1	3.016	105.2	14.807
105.5	5.1999	105.4	6.156	105.7	3.4177	105	5.7566	105.2	3.0291	105.4	14.782
105.6	5.2583	105.5	7.0727	105.8	2.8777	105.1	6.7377	105.3	2.4986	105.5	13.6328
105.8	5.9044	105.6	5.8925	105.9	2.1613	105.3	6.0976	105.4	3.1328	105.6	14.6925
105.9	5.4467	105.7	6.5184	106.1	3.6561	105.4	4.8172	105.5	2.3961	105.7	14.087
106	4.89	105.9	6.3992	106.1	3.2723	105.5	6.0117	105.7	2.1827	105.8	13.6423
106.1	5.6148	106	5.9927	106.2	3.5131	105.6	5.3108	105.8	2.1338	106	13.6673
106.1	5.3144	106.1	6.1357	106.3	3.5763	105.7	5.1987	105.9	2.1064	106.1	12.9366
106.3	5.0259	106.1	6.4301	106.4	3.68	105.8	5.3501	106	2.0564	106.1	13.7341
106.4	5.0986	106.2	6.8831	106.6	4.549	106	4.7398	106.1	1.8108	106.2	12.4347
106.5	4.4715	106.3	6.8307	106.7	4.5216	106.1	5.4872	106.2	1.2374	106.4	13.535
106.6	4.3952	106.5	6.7985	106.8	4.3297	106.1	4.5943	106.3	1.1539	106.5	13.3562
106.7	4.5049	106.6	7.1645	106.9	4.3869	106.2	5.1379	106.4	0.5782	106.6	13.3288
106.8	3.8171	106.7	6.9129	107	4.0782	106.4	5.2023	106.5	1.1301	106.7	13.4718
107	4.611	106.8	6.9392	107.2	4.6206	106.5	5.2214	106.6	1.1408	106.8	12.8162
107.1	3.4463	106.9	7.1633	107.3	5.1963	106.6	6.3956	106.7	0.2825	107	14.0667
107.2	2.5809	107.1	6.9559	107.4	4.971	106.7	6.5315	106.8	0.3409	107.1	15.4781
107.3	3.8755	107.2	6.7317	107.5	4.4584	106.8	7.2408	107	0.2551	107.2	15.291
107.4	2.9409	107.3	6.7258	107.7	5.1093	106.9	6.7914	107.1	0.1395	107.3	15.8787
107.6	3.134	107.4	6.6257	107.8	3.6979	107.1	8.1444	107.2	-0.0072	107.4	16.7012
107.7	3.1781	107.5	6.3062	107.9	4.0877	107.2	7.9536	107.3	-0.1323	107.6	18.0399
107.8	3.109	107.7	6.1917	108	3.5369	107.3	7.6437	107.5	-0.0048	107.7	18.6348
107.9	2.681	107.8	7.0763	108.1	3.3808	107.4	8.8334	107.6	-0.3028	107.8	20.0093
108	2.9039	107.9	6.5744	108.2	3.5667	107.5	8.9276	107.7	0.3004	107.9	19.9676
108.2	2.4664	108	7.3886	108.4	2.3401	107.6	8.986	107.8	-0.1001	108	19.8388
108.3	2.9528	108.1	8.1468	108.5	3.0589	107.7	9.3639	107.9	0.2325	108.2	20.6697
108.4	2.8324	108.2	8.4019	108.6	2.7025	107.9	9.5081	108	0.6306	108.3	20.1213
108.5	3.6919	108.4	8.3566	108.7	2.9612	108	10.8445	108.2	0.6104	108.4	19.9676
108.6	3.4332	108.5	8.8644	108.8	3.3915	108.1	10.9494	108.3	0.7498	108.5	19.2988
108.8	3.6037	108.6	8.9502	108.9	3.3021	108.2	12.1284	108.4	0.3791	108.6	18.5919
108.9	3.7646	108.8	9.5415	109.1	4.2033	108.3	11.4465	108.5	0.8547	108.8	19.0878
109	3.6693	108.9	9.1612	109.2	3.7837	108.4	13.3014	108.6	0.7141	108.9	18.4178
109.1	3.9077	109	9.9099	109.3	4.4405	108.6	13.6924	108.8	0.329	109	18.6455
109.2	3.6716	109.1	9.1612	109.4	5.0604	108.7	12.9247	108.9	0.0954	109.1	16.8574
109.3	3.5167	109.2	9.774	109.5	4.108	108.8	12.5122	109	-0.4017	109.3	17.4189
109.5	3.2282	109.3	9.4235	109.7	4.5621	108.9	12.8019	109.1	0.1502	109.4	17.3485
109.6	3.7932	109.5	9.1386	109.8	4.5812	109	13.1154	109.2	-0.062	109.5	16.886
109.7	3.0804	109.6	9.3019	109.9	4.0913	109.2	12.6994	109.4	-0.788	109.6	16.4413
109.8	3.7074	109.7	9.5081	110	4.4167	109.3	13.2191	109.5	-1.0943	109.7	16.1648
109.9	3.1626	109.8	9.6262	110.1	4.338	109.4	10.7384	109.6	-1.0407	109.8	15.62
110.1	2.557	109.9	9.4974	110.3	4.2331	109.5	12.1057	109.7	-1.6558	110	15.6069
110.2	2.7215	110.1	9.7859	110.4	4.102	109.6	10.4046	109.8	-0.6807	110.1	15.3184
110.3	3.5489	110.2	9.8872	110.5	4.4513	109.8	9.1612	110	-1.3256	110.2	16.4747
110.4	2.8718	110.3	9.2947	110.6	4.6539	109.9	8.8739	110.1	-0.6342	110.3	15.1479
110.5	2.8253	110.4	10.0195	110.8	4.7696	110	8.4007	110.2	-2.4164	110.4	15.7571
110.7	3.1483	110.5	8.3816	110.9	4.4668	110.1	7.6556	110.3	0.6175	110.6	14.9274
110.8	3.4475	110.6	8.7941	111	4.7636	110.2	5.8436	110.4	0.9751	110.7	14.5841
110.9	2.6202	110.7	8.9824	111.1	5.8126	110.4	7.5102	110.6	1.6582	110.8	14.8928
111	3.2175	110.9	9.0492	111.2	5.1975	110.5	7.2873	110.7	2.2638	110.9	14.3754
111.1	3.5322	111	8.6129	111.3	5.5182	110.6	6.5148	110.8	3.3152	111	14.0131
111.2	3.5667	111.1	8.6737	111.4	5.7793	110.7	6.5672	110.9	3.1054	111.1	12.7423
111.3	3.0851	111.1	9.6452	111.5	5.4312	110.9	6.5541	111	3.7014	111.2	14.0619
111.4	3.438	111.3	8.6892	111.6	4.8852	110.9	6.8653	111.1	4.1068	111.3	13.0117
111.5	3.109	111.4	9.6154	111.8	4.8614	111.1	7.4172	111.2	3.3653	111.4	12.6135
111.7	2.923	111.5	9.2769	111.9	5.7149	111.1	7.4065	111.3	4.1044	111.5	12.8269
111.8	2.9385	111.6	8.7237	112	4.8053	111.2	7.5841	111.4	4.1187	111.7	12.1224
111.9	2.4986	111.7	8.6284	112.1	4.4823	111.3	8.4543	111.5	4.2808	111.8	12.4264
112	2.4712	111.9	7.8642	112.3	5.722	111.5	7.9203	111.6	4.6086	111.9	12.9223
112.1	1.4544	112	8.0442	112.4	4.6992	111.6	9.4605	111.8	4.7123	112	13.5386
112.3	2.8217	112.1	7.8344	112.5	5.3787	111.7	8.6141	111.9	4.1246	112.1	12.7089
112.4	1.6844	112.2	7.4267	112.6	5.368	111.8	9.1541	112	4.4215	112.2	12.8686
112.5	1.663	112.3	7.3421	112.7	4.6873	111.9	9.4557	112.1	4.6968	112.4	13.2716
112.6	1.4198	112.5	7.0333	112.8	5.6982	112.1	10.3641	112.3	3.8242	112.5	13.9487
112.7	1.5271	112.6	6.9666	113	6.1691	112.2	10.041	112.4	3.6728	112.6	13.8366
112.9	1.303	112.7	6.9737	113.1	5.399	112.3	9.2602	112.5	2.9516	112.7	14.2658
113	2.5475	112.8	6.7258	113.2	5.0795	112.4	7.5519	112.6	3.2806	112.8	14.0059
113.1	2.1946	112.9	7.1323	113.3	5.0819	112.5	9.0969	112.8	2.3305	113	14.9727
113.2	2.2817	113.1	6.808	113.4	5.0199	112.6	8.5855	112.9	3.5369	113.1	14.5853
113.3	2.3699	113.2	6.6495	113.6	5.1045	112.8	6.671	113	3.7909	113.2	14.9298
113.4	2.3425	113.3	6.82	113.7	5.0807	112.9	6.4588	113.1	3.9136	113.4	15.0406
113.6	3.2079	113.4	7.5507	113.8	5.492	113	7.4911	113.2	3.9458	113.5	15.1598
113.7	2.9945	113.6	6.6006	113.9	6.1309	113.1	7.9274	113.3	3.5334	113.6	15.4948
113.8	3.1829	113.7	7.8261	114.1	5.3608	113.2	7.8237	113.4	3.1948	113.7	16.2649
113.9	4.4644	113.8	7.2873	114.2	5.7054	113.4	7.6282	113.6	2.5547	113.8	15.3029
114	3.9852	113.9	7.5722	114.3	6.5625	113.5	7.5042	113.7	2.6286	113.9	16.5033
114.2	3.7897	114	8.0705	114.4	6.1858	113.6	7.1859	113.8	2.2542	114.1	16.8312
114.3	3.2961	114.1	8.2886	114.6	6.6292	113.7	8.1813	113.9	1.1742	114.2	17.1065
114.4	3.9279	114.3	8.6331	114.7	6.4015	113.8	8.7774	114	1.3316	114.3	17.2102
114.5	4.0972	114.4	8.7118	114.8	5.6541	114	7.5185	114.2	1.6499	114.4	17.4916
114.6	3.5894	114.5	8.4591	114.9	6.0093	114.1	7.5924	114.3	0.782	114.5	17.1196
114.8	4.0519	114.6	8.6176	115.1	4.4763	114.2	7.8452	114.4	0.9608	114.6	17.3867
114.9	3.5644	114.8	8.0824	115.2	5.188	114.3	6.4921	114.5	0.8547	114.8	16.4413
115	4.3762	114.9	8.0609	115.3	3.9566	114.4	7.9083	114.6	1.2207	114.9	17.01
115.1	3.7837	115	7.7844	115.4	4.0042	114.5	6.7687	114.8	1.3423	115	16.2148
115.3	4.5693	115.1	7.7772	115.5	3.4249	114.7	7.1335	114.9	1.2457	115.1	16.2327
115.4	4.8983	115.2	6.9785	115.7	3.531	114.8	6.5112	115	1.8167	115.3	14.9953
115.5	3.6824	115.4	7.4255	115.8	3.0184	114.9	6.7556	115.1	1.3244	115.4	15.1622
115.6	4.549	115.5	7.3254	115.9	2.6977	115	8.6916	115.2	1.8752	115.5	15.0466
115.7	4.307	115.6	8.1587	116	2.8002	115.1	8.3053	115.4	1.3018	115.6	15.5675
115.9	4.5848	115.7	7.8356	116.1	2.5022	115.2	9.2733	115.5	2.1589	115.7	14.7665
116	4.8149	115.8	8.3923	116.2	2.5308	115.4	8.0431	115.6	2.346	115.9	15.6307
116.1	4.9686	115.9	8.2052	116.3	2.2161	115.5	9.6321	115.7	2.3592	116	14.1895
116.1	3.3259	116.1	8.7035	116.4	4.0424	115.6	10.9899	115.8	2.7251	116.1	15.3399
116.3	4.6158	116.1	8.7821	116.5	2.476	115.7	8.9359	116	2.6286	116.1	14.9632
116.4	3.9673	116.2	8.831	116.7	3.2246	115.9	11.5573	116.1	3.1877	116.2	15.4507
116.5	4.6146	116.3	8.3256	116.8	3.5131	116	11.183	116.1	3.283	116.4	15.0859
116.6	4.3476	116.4	8.9669	116.9	2.2054	116.1	11.3177	116.2	3.587	116.5	15.049
116.7	4.2677	116.6	9.3067	117	3.5775	116.1	11.9841	116.3	3.258	116.6	15.4185
116.9	4.2856	116.7	9.3734	117.2	2.5606	116.2	10.5357	116.5	2.3401	116.7	15.3387
117	3.5369	116.8	8.8036	117.3	3.0828	116.4	11.164	116.6	3.2198	116.8	15.5699
117.1	3.3975	116.9	9.4211	117.4	3.2794	116.5	10.221	116.7	2.6798	116.9	15.5139
117.2	4.2939	117	9.0158	117.5	3.5286	116.6	11.0924	116.8	2.3317	117.1	15.1789
117.4	3.86	117.2	8.6176	117.6	2.9695	116.7	10.1626	116.9	1.6236	117.2	15.5604
117.5	3.5453	117.3	9.1803	117.7	2.4903	116.8	10.0696	117	1.7643	117.3	15.8691
117.6	3.4463	117.4	8.8298	117.9	2.4247	117	10.5166	117.2	1.2338	117.4	15.7952
117.7	3.6263	117.5	8.8155	118	3.0792	117.1	9.1898	117.3	0.7904	117.5	15.8286
117.8	3.5381	117.6	8.4126	118.1	2.743	117.2	7.503	117.4	0.7677	117.7	15.7595
118	4.0102	117.7	8.1015	118.2	2.408	117.3	9.5367	117.5	1.0872	117.8	16.7167
118.1	3.0661	117.9	8.1038	118.4	1.9848	117.4	9.4259	117.6	0.8821	117.9	16.4545
118.2	3.3104	118	8.2624	118.5	1.1945	117.6	8.5652	117.8	1.1933	118	16.3007
118.3	2.9242	118.1	8.5902	118.6	2.7752	117.7	9.7883	117.9	1.148	118.1	17.3247
118.4	3.0363	118.2	8.347	118.7	0.906	117.8	9.7513	118	1.6689	118.3	17.2377
118.6	2.8408	118.3	8.1098	118.9	1.8013	117.9	10.1876	118.1	0.8607	118.4	17.556
118.7	3.4583	118.4	8.7118	119	0.8368	118	11.0388	118.2	1.3196	118.5	17.4642
118.8	2.7275	118.6	8.564	119.1	1.9801	118.1	9.8825	118.4	1.3256	118.6	18.9805
118.9	2.7204	118.7	8.415	119.2	1.5843	118.2	10.8683	118.5	0.5841	118.7	18.5967
119.1	2.4271	118.8	9.1159	119.3	0.7379	118.4	11.6003	118.6	1.0097	118.9	18.1782
119.2	3.4392	118.9	8.601	119.5	1.0407	118.5	10.289	118.7	1.1361	119	18.487
119.3	2.8062	119.1	8.8012	119.6	1.7869	118.6	10.6835	118.8	1.21	119.1	19.4645
119.4	3.0303	119.2	8.9538	119.7	0.2682	118.7	9.5105	119	0.6592	119.2	18.6574
119.5	3.1042	119.3	8.5545	119.8	1.2445	118.8	9.1088	119.1	1.6367	119.3	18.7397
119.6	2.3746	119.4	7.6509	120	0.9668	119	9.1815	119.2	1.775	119.5	18.3964
119.8	2.2924	119.5	7.8344	120.1	0.3695	119.1	9.0349	119.3	2.1446	119.6	18.4155
119.9	1.682	119.7	7.9501	120.2	0.8833	119.2	8.5402	119.4	2.0432	119.7	18.9257
120	2.1565	119.8	7.8356	120.3	2.2185	119.3	8.3458	119.6	1.8466	119.8	18.7492
120.1	2.8133	119.9	7.1466	120.4	0.4864	119.4	7.4697	119.7	0.5448	119.9	17.9446
120.2	1.874	120	7.2777	120.5	1.6832	119.6	9.2125	119.8	-0.0656	120	18.0161
120.4	2.4045	120.1	7.2265	120.7	2.0194	119.7	8.502	119.9	-0.6843	120.2	17.0386
120.5	2.6774	120.3	7.447	120.8	1.0395	119.8	9.2268	120	0.9644	120.3	18.363
120.6	2.948	120.4	7.3802	120.9	2.4021	119.9	9.7704	120.1	0.3302	120.4	17.581
120.7	3.5405	120.5	7.1776	121	2.6524	120.1	9.5761	120.3	-0.267	120.5	18.2772
120.8	3.6108	120.6	6.9058	121.1	2.6965	120.2	9.6786	120.4	0.3707	120.7	18.0984
121	3.4904	120.7	7.2813	121.3	3.3891	120.3	10.736	120.5	0.6938	120.8	17.9613
121.1	4.4501	120.9	7.962	121.4	2.8384	120.4	10.9971	120.6	0.1669	120.9	19.623
121.2	4.1676	121	8.0764	121.5	3.4344	120.5	11.5693	120.7	1.9181	121	19.4335
121.3	4.6968	121.1	8.2469	121.6	3.3534	120.6	10.1697	120.9	2.0683	121.2	19.381
121.4	4.3786	121.2	8.2934	121.7	3.4702	120.7	11.847	121	1.837	121.3	20.2203
121.6	5.0259	121.4	8.9002	121.9	4.1652	120.9	12.1439	121.1	2.7645	121.4	19.1295
121.7	4.6229	121.5	9.6405	122	4.406	121	11.0388	121.2	2.7263	121.5	19.2237
121.8	4.9841	121.6	9.985	122.1	3.3748	121.1	11.5311	121.3	1.967	121.6	20.318
121.9	5.1117	121.7	9.5105	122.2	4.5359	121.3	11.4477	121.4	3.016	121.7	19.356
122.1	5.4204	121.8	9.3436	122.3	4.2009	121.4	11.7731	121.6	2.8932	121.9	19.747
122.2	4.6492	121.9	9.7144	122.5	4.9758	121.5	9.9719	121.7	2.6309	122	18.7063
122.3	4.2593	122.1	9.11	122.6	4.7982	121.6	9.439	121.8	2.5749	122.1	18.3654
122.4	4.3714	122.2	9.3555	122.7	3.686	121.7	9.7132	121.9	2.1505	122.2	17.1435
122.5	4.5621	122.3	8.5998	122.8	4.3583	121.9	10.1733	122	2.5511	122.3	17.4916
122.6	4.009	122.4	8.2886	123	4.1389	122	8.7965	122.2	2.2006	122.5	16.948
122.8	4.0936	122.5	8.1527	123.1	3.8958	122.1	9.5236	122.3	2.2316	122.6	16.3603
122.9	3.2198	122.6	8.1134	123.2	4.7779	122.2	10.0744	122.4	3.2115	122.7	15.9907
123	4.0174	122.8	7.2515	123.3	2.9647	122.3	9.7823	122.5	3.0887	122.8	15.4746
123.2	3.5465	122.9	7.1251	123.5	3.2055	122.4	10.9065	122.6	3.1483	122.9	14.1108
123.3	4.1544	123	6.6924	123.6	4.3285	122.6	10.1781	122.7	3.0088	123	14.6472
123.4	4.0102	123.1	6.9225	123.7	4.0424	122.7	10.6347	122.9	3.5906	123.2	13.3073
123.5	5.0616	123.3	6.4111	123.8	3.0506	122.8	10.4451	123	3.2067	123.3	13.8831
123.6	4.4203	123.4	7.1919	123.9	3.9911	122.9	11.1997	123.1	3.3879	123.4	14.4756
123.8	4.3571	123.5	6.8247	124	3.9518	123	11.1461	123.2	3.9649	123.5	14.4172
123.9	5.7352	123.6	7.1597	124.2	3.4308	123.1	10.5357	123.3	3.6609	123.7	13.3455
124	4.9841	123.7	7.2527	124.3	3.7694	123.3	10.9279	123.5	3.6407	123.8	15.0418
124.1	5.1439	123.8	7.6187	124.4	4.3643	123.4	11.22	123.6	2.9504	123.9	14.782
124.3	5.4514	124	8.2648	124.5	3.7289	123.5	11.3356	123.7	3.2413	124	15.9132
124.4	4.5466	124.1	8.3864	124.6	3.8767	123.6	11.1306	123.8	3.3498	124.1	15.4734
124.5	4.9102	124.2	8.477	124.7	3.8207	123.8	11.4346	124	2.9302	124.2	15.6498
124.6	5.4073	124.3	9.1636	124.8	3.7158	123.9	11.0269	124.1	3.0947	124.4	15.682
124.7	5.2643	124.4	8.9729	125	3.5989	124	11.8434	124.2	3.171	124.5	15.6498
124.8	4.4668	124.6	9.352	125.1	3.2151	124.1	11.6301	124.3	3.3736	124.6	15.7022
124.9	4.8888	124.7	9.5499	125.2	3.9208	124.2	11.5633	124.4	2.9433	124.7	15.5234
125.1	5.0557	124.8	9.4068	125.3	3.5107	124.4	11.1568	124.5	3.9387	124.8	14.6675
125.2	4.8447	124.9	9.4092	125.5	2.2542	124.5	9.6703	124.7	3.9411	124.9	15.1372
125.3	4.4668	125	9.383	125.6	3.3462	124.6	12.1522	124.8	3.3212	125.1	14.9465
125.4	5.1749	125.2	9.2137	125.7	2.0874	124.7	11.8291	124.9	4.0412	125.2	15.6891
125.6	3.8433	125.3	10.0565	125.8	2.9421	124.8	13.1965	125	3.2985	125.3	15.6045
125.7	4.1068	125.4	9.6571	125.9	3.5059	124.9	12.4609	125.1	3.7849	125.4	15.1265
125.8	4.8757	125.5	9.5117	126.1	1.508	125.1	11.7922	125.3	3.6991	125.5	16.0742
125.9	5.0712	125.6	9.402	126.2	2.3746	125.2	11.6456	125.4	3.9136	125.7	14.4684
126	4.0519	125.7	9.4199	126.3	3.047	125.3	9.4736	125.5	3.7932	125.8	15.2254
126.2	4.8459	125.9	9.892	126.4	1.9813	125.4	10.9386	125.6	3.0553	125.9	15.5294
126.3	4.8399	126	10.1912	126.5	2.6298	125.5	12.5015	125.8	3.3569	126	15.5497
126.4	5.275	126.1	10.3092	126.7	1.5843	125.6	10.9088	125.9	4.0102	126.1	14.3433
126.5	3.8695	126.2	10.0267	126.8	2.8384	125.8	10.916	126	3.2783	126.2	16.9289
126.6	3.7313	126.3	9.7907	126.9	2.7823	125.9	10.5393	126.1	3.6788	126.4	16.9301
126.8	4.5371	126.4	10.1674	127	2.861	126	9.4509	126.2	2.7585	126.5	17.2091
126.9	4.6444	126.6	9.9278	127.2	3.0518	126.2	10.6645	126.3	2.5296	126.6	17.5309
127	4.0662	126.7	10.2627	127.3	2.5308	126.3	10.4439	126.5	2.4152	126.7	18.3094
127.1	4.3869	126.8	10.3498	127.4	3.5548	126.4	10.3152	126.6	2.2209	126.9	18.4059
127.3	4.375	127	10.1614	127.5	4.1258	126.5	10.8969	126.7	1.8191	127	18.301
127.4	3.8266	127	9.532	127.6	3.7158	126.6	9.47	126.8	1.7381	127.1	19.3679
127.5	4.0388	127.2	10.0851	127.8	4.2403	126.7	10.6096	126.9	1.5616	127.2	18.6026
127.6	4.1413	127.3	10.0946	127.9	3.7694	126.8	9.1827	127.1	1.5378	127.3	18.0709
127.7	4.1533	127.4	9.6416	128	4.0174	127	10.2139	127.2	1.9252	127.4	18.4035
127.8	3.5644	127.5	9.1827	128.1	4.7171	127.1	9.8193	127.3	1.6642	127.6	17.6656
128	3.8338	127.7	9.774	128.3	4.3702	127.2	8.9705	127.4	1.4365	127.7	17.885
128.1	3.9387	127.8	9.1457	128.4	3.7205	127.3	9.1577	127.5	1.5378	127.8	17.1852
128.2	3.6573	127.9	9.0611	128.5	5.4443	127.5	9.5665	127.7	1.3983	127.9	16.8729
128.3	4.3595	128	9.3901	128.6	4.4441	127.6	9.6476	127.8	1.5211	128	16.6178
128.4	4.319	128.1	9.0635	128.7	5.4562	127.7	9.9337	127.9	1.4973	128.2	16.6237
128.5	4.8971	128.2	8.6749	128.8	4.3452	127.8	9.8073	128	0.6044	128.3	16.0658
128.7	5.3418	128.3	9.34	129	5.7614	127.9	11.1759	128.1	0.3803	128.4	16.3472
128.8	4.6015	128.5	8.6713	129.1	6.2227	128	9.6786	128.3	0.5984	128.5	15.8429
128.9	4.8018	128.6	9.2876	129.2	5.3632	128.2	10.1662	128.4	0.2921	128.6	16.2637
129	4.2975	128.7	8.4579	129.3	5.8055	128.3	9.0158	128.5	0.5555	128.8	15.6057
129.1	4.878	128.8	8.6713	129.4	6.4313	128.4	9.6464	128.6	0.031	128.9	15.5282
129.2	5.3656	128.9	8.5104	129.6	5.7566	128.5	9.675	128.7	0.6843	129	15.4877
129.4	4.3488	129.1	7.8118	129.7	6.9284	128.6	9.2328	128.9	0.1001	129.1	16.0718
129.5	4.2808	129.2	7.6211	129.8	5.0366	128.8	8.9562	129	0.5472	129.2	17.0457
129.6	3.9363	129.3	7.9155	129.9	6.8295	128.9	8.2445	129.1	0.9227	129.4	16.619
129.7	4.1926	129.4	7.6306	130	6.3956	129	7.6461	129.2	1.1659	129.5	16.4247
129.8	3.9315	129.5	7.8893	130.2	6.5982	129.1	9.4378	129.3	1.4269	129.6	17.3402
130	4.0317	129.7	7.1406	130.3	6.5398	129.2	9.3353	129.4	0.9239	129.7	15.8274
130.1	4.0567	129.8	7.6354	130.4	6.1989	129.4	8.8966	129.6	1.6987	129.8	16.6428
130.2	4.2236	129.9	7.3743	130.5	5.5301	129.5	8.5044	129.7	1.8001	130	16.6345
130.3	4.3786	130	7.5567	130.7	6.9714	129.6	8.7428	129.8	1.7083	130.1	15.6629
130.4	3.4463	130.1	7.8833	130.8	6.3729	129.7	9.8467	129.9	1.5819	130.2	16.2089
130.5	4.003	130.3	8.3101	130.9	7.05	129.9	9.6989	130.1	2.0528	130.3	16.1505
130.7	5.2416	130.4	8.8739	131	7.1669	129.9	9.3889	130.2	1.5664	130.4	14.888
130.8	4.3345	130.5	9.0313	131.1	6.9273	130.1	10.1995	130.3	1.6975	130.5	15.1503
130.9	3.5346	130.6	8.8644	131.3	8.2433	130.2	7.5197	130.4	1.2648	130.7	14.981
131	3.6931	130.7	9.2828	131.4	8.0168	130.3	10.2031	130.5	0.8047	130.8	13.8056
131.1	4.0936	130.8	8.6939	131.5	8.502	130.4	10.7944	130.6	1.0622	130.9	13.8128
131.3	3.1734	131	9.2947	131.6	8.7047	130.5	9.2614	130.8	0.6819	131	14.5412
131.4	3.6848	131.1	9.1207	131.7	8.4019	130.6	11.09	130.9	1.5926	131.1	13.6614
131.5	3.0398	131.2	8.837	131.9	8.1241	130.8	12.1999	131	1.2445	131.2	14.2145
131.6	3.0923	131.3	8.8584	132	8.7261	130.9	11.8732	131.1	1.3089	131.3	13.8831
131.7	3.2103	131.4	8.5068	132.1	8.0013	131	12.6779	131.2	0.8368	131.5	14.2646
131.9	4.0758	131.6	8.6498	132.2	7.6509	131.1	12.6791	131.3	1.6296	131.6	14.6961
132	3.7777	131.7	8.3065	132.3	7.1323	131.2	13.0856	131.5	0.807	131.7	15.2838
132.1	3.5226	131.8	8.1587	132.4	6.454	131.4	13.4528	131.6	1.9753	131.8	15.8691
132.2	3.4904	131.9	8.6188	132.6	6.4826	131.5	12.6338	131.7	1.8096	132	16.5784
132.3	4.1246	132	7.745	132.7	5.8413	131.6	11.0996	131.8	1.5724	132.1	17.2603
132.5	3.6108	132.1	8.0144	132.8	7.0536	131.7	12.9378	132	1.7953	132.2	17.2567
132.6	3.6263	132.3	8.074	132.9	6.3777	131.9	11.5228	132.1	1.9908	132.3	17.5655
132.7	4.0948	132.4	8.3721	133	6.1083	132	11.3583	132.2	2.1553	132.4	17.2937
132.8	3.7849	132.5	7.7474	133.1	6.3658	132.1	10.0791	132.3	1.6618	132.6	17.4308
133	3.7432	132.6	8.3029	133.3	5.5945	132.2	9.1183	132.4	3.0506	132.7	17.9088
133.1	3.9327	132.7	8.688	133.4	6.2513	132.3	8.9252	132.6	3.6705	132.8	16.9206
133.2	4.6527	132.9	8.3947	133.5	6.5696	132.5	9.6488	132.7	3.1412	132.9	17.6632
133.3	4.9651	133	8.7821	133.6	5.9736	132.6	9.0158	132.8	3.3963	133	16.7537
133.4	5.3561	133.1	8.7631	133.8	5.7423	132.7	9.1159	132.9	3.4952	133.1	16.3603
133.6	6.4659	133.2	9.3555	133.9	5.0926	132.8	8.0037	133	3.4332	133.3	16.6202
133.7	6.2108	133.3	9.2196	134	4.6301	132.9	7.9942	133.1	3.6955	133.4	16.588
133.8	6.4957	133.4	9.8431	134.1	4.9722	133.1	7.8118	133.3	3.5846	133.5	16.4914
133.9	6.5255	133.6	8.7225	134.2	4.6587	133.2	8.4817	133.4	2.8706	133.6	17.0505
134	6.4135	133.7	8.8644	134.3	3.6919	133.3	7.4303	133.5	2.1958	133.7	17.1196
134.1	6.0594	133.8	9.4128	134.5	3.6407	133.4	7.4053	133.6	2.2495	133.9	17.8301
134.3	6.3515	133.9	9.1195	134.6	2.5988	133.5	8.3053	133.8	2.3019	134	17.2031
134.4	5.9032	134	8.7476	134.7	2.4569	133.6	7.4136	133.9	1.9968	134.1	17.1161
134.5	5.2869	134.2	8.7428	134.8	1.5604	133.8	6.1381	134	2.4414	134.2	18.0244
134.6	4.6337	134.3	8.7929	134.9	2.4891	133.9	7.0393	134.1	1.9419	134.3	18.0817
134.7	4.1473	134.4	8.3172	135.1	1.3101	134	8.0395	134.2	2.7907	134.4	18.8303
134.8	4.2427	134.5	8.8835	135.2	0.9978	134.1	8.9729	134.3	2.749	134.6	19.5169
135	4.7839	134.6	8.6248	135.3	2.1362	134.2	8.8263	134.4	2.3818	134.7	18.8649
135.1	3.8636	134.7	8.6594	135.4	1.8346	134.4	9.0277	134.6	3.3188	134.8	18.9054
135.2	4.3774	134.9	8.8751	135.6	1.4722	134.5	8.9836	134.7	2.7955	134.9	19.7268
135.3	4.3452	135	8.8394	135.7	3.3271	134.6	10.5369	134.8	3.6025	135	20.4837
135.5	4.1592	135.1	8.9443	135.8	4.133	134.7	10.1233	134.9	3.2854	135.2	19.2654
135.6	4.1652	135.2	9.3615	135.9	3.5834	134.8	11.4763	135.1	3.8517	135.3	20.4527
135.7	4.0269	135.3	9.3544	136.1	4.3893	134.9	10.1912	135.2	4.8435	135.4	19.8245
135.8	3.6311	135.4	10.047	136.2	4.0066	135	10.2091	135.3	4.4727	135.5	19.6576
135.9	3.8028	135.6	9.9313	136.3	4.7469	135.2	9.7406	135.4	3.3951	135.6	19.0556
136	3.7074	135.7	10.4928	136.4	4.2856	135.3	10.3331	135.5	3.2258	135.8	19.2773
136.1	3.6263	135.8	10.2901	136.5	4.5609	135.4	9.1195	135.6	3.1161	135.9	18.0054
136.3	3.19	135.9	10.5262	136.7	4.8375	135.5	9.3544	135.8	2.7072	136	19.0341
136.4	3.0696	136	10.7193	136.8	2.9767	135.7	11.3499	135.9	2.9957	136.1	19.033
136.5	3.1877	136.2	10.7729	136.9	4.0841	135.8	10.922	136	1.4281	136.2	18.0137
136.6	2.5702	136.3	9.6858	137	3.4678	135.9	9.0909	136.1	1.5366	136.3	18.4
136.7	2.2376	136.4	10.4618	137.1	3.2568	136	9.8205	136.2	1.2457	136.5	17.6096
136.8	2.7645	136.5	9.1684	137.3	4.2605	136.1	11.0543	136.4	1.7428	136.6	19.4156
137	2.6894	136.6	9.3067	137.3	3.3879	136.2	11.5943	136.5	0.8202	136.7	18.2056
137.1	2.2042	136.7	8.8429	137.5	3.0184	136.4	13.3562	136.6	2.6584	136.8	19.486
137.2	2.7561	136.9	8.235	137.6	3.9089	136.5	11.7648	136.7	2.8396	136.9	18.9042
137.3	2.5427	137	8.6868	137.7	3.7289	136.6	10.9112	136.8	3.6407	137	19.6767
137.4	3.0875	137.1	7.7927	137.8	4.2808	136.7	12.4145	137	3.2258	137.2	18.8696
137.5	4.1437	137.2	7.9155	137.9	3.9172	136.8	12.0258	137.1	4.493	137.3	18.3582
137.7	3.7146	137.3	8.0824	138	4.6957	136.9	11.1723	137.2	4.5919	137.4	18.4596
137.8	4.2248	137.5	7.726	138.2	4.6074	137	10.9136	137.3	4.2939	137.5	18.4596
137.9	4.1592	137.6	7.7164	138.3	4.7314	137.1	11.0984	137.4	4.8542	137.6	17.3545
138	5.2106	137.7	7.4482	138.4	4.9114	137.3	10.2854	137.5	4.9424	137.8	17.4248
138.2	4.4048	137.8	8.0919	138.5	5.0139	137.4	10.4344	137.6	5.0771	137.9	17.184
138.3	5.2726	137.9	8.0121	138.6	5.7459	137.5	10.4868	137.8	4.3476	138	16.9909
138.4	5.0795	138.1	7.3969	138.7	5.9414	137.6	11.5204	137.9	3.5441	138.1	17.3056
138.5	4.8113	138.2	7.9501	138.8	4.8923	137.7	8.2088	138	3.8171	138.2	17.7598
138.6	5.2416	138.3	8.5211	139	5.9223	137.9	10.5035	138.1	2.9647	138.3	17.6692
138.8	5.0509	138.4	8.3494	139.1	5.8699	138	10.7038	138.2	2.4199	138.5	17.7765
138.9	4.7398	138.5	8.5843	139.2	5.6982	138.1	9.2196	138.4	3.2067	138.6	18.0423
139	4.5776	138.7	7.8166	139.3	5.5599	138.2	10.4535	138.5	2.4855	138.7	18.4703
139.1	4.5919	138.8	8.3387	139.5	5.4443	138.3	10.5071	138.6	2.8682	138.8	17.5488
139.2	3.3164	138.9	8.3733	139.6	4.5586	138.5	8.7345	138.7	2.4772	138.9	18.1103
139.3	4.425	139	8.4448	139.7	4.673	138.6	9.0265	138.8	1.7917	139.1	18.6336
139.5	3.6311	139.1	8.6403	139.8	4.3976	138.7	10.1769	139	2.2173	139.2	17.9386
139.6	3.9315	139.2	8.8346	139.9	4.2856	138.8	9.4986	139.1	2.0063	139.3	17.1268
139.7	3.5727	139.4	8.7404	140	4.4751	138.9	8.2004	139.2	1.9276	139.4	18.6312
139.8	3.0947	139.5	9.6214	140.2	3.2425	139	7.906	139.3	2.5487	139.5	18.419
140	2.8682	139.6	8.5425	140.3	4.2903	139.2	8.2886	139.4	2.1267	139.6	18.1186
140.1	3.8099	139.7	8.5092	140.4	4.7052	139.3	7.7844	139.5	2.0504	139.7	16.9826
140.2	3.7408	139.8	8.8322	140.5	4.8363	139.4	8.868	139.7	2.0874	139.9	17.6191
140.3	3.7432	139.9	8.8191	140.6	5.2023	139.5	7.7081	139.8	1.5044	140	18.3928
140.4	3.6812	140.1	8.3017	140.7	5.5814	139.6	8.8894	139.9	1.8573	140.1	18.4655
140.6	3.1865	140.2	8.9765	140.9	6.5947	139.8	9.4831	140	1.4579	140.2	18.7337
140.7	4.0674	140.3	7.9358	141	7.1955	139.9	8.9157	140.2	0.4888	140.3	18.7898
140.8	3.5059	140.4	8.316	141.1	6.2847	140	9.2006	140.3	1.5008	140.4	18.7314
140.9	3.7348	140.5	8.8084	141.2	6.3336	140.1	9.4986	140.4	1.086	140.6	18.1663
141	3.7575	140.7	8.2445	141.3	7.0846	140.2	9.4819	140.5	0.9298	140.7	18.7457
141.1	3.0482	140.8	7.9882	141.5	6.8438	140.3	9.9671	140.6	0.5567	140.8	18.9245
141.3	2.811	140.9	7.7116	141.6	7.0918	140.5	11.4906	140.8	0.4435	140.9	18.1067
141.4	2.687	141	7.6377	141.7	6.2835	140.6	11.5943	140.9	1.2779	141	17.4332
141.5	2.3949	141.1	7.5638	141.8	6.6829	140.7	11.9209	141	0.3743	141.2	18.6121
141.6	2.3437	141.2	7.1883	141.9	6.7019	140.8	9.7954	141.1	0.6711	141.3	18.6276
141.7	2.3341	141.4	7.2539	142	6.1083	140.9	12.5659	141.2	1.0192	141.4	19.2571
141.9	2.6321	141.4	6.7699	142.2	6.6721	141.1	12.9926	141.4	0.3827	141.5	18.2188
142	1.7798	141.6	7.7808	142.3	6.2644	141.2	12.9807	141.5	1.3793	141.6	19.002
142.1	2.11	141.7	7.1955	142.4	5.4801	141.3	13.634	141.6	1.3196	141.7	18.0769
142.2	2.2876	141.8	7.6759	142.5	6.336	141.4	11.9436	141.7	1.6081	141.8	18.3082
142.3	3.4487	141.9	7.2265	142.7	6.3741	141.5	11.9424	141.8	2.1315	142	18.7433
142.4	3.2926	142	7.8702	142.8	5.6493	141.7	13.5386	141.9	1.57	142.1	18.996
142.6	3.5572	142.2	8.142	142.9	5.9104	141.8	12.9545	142.1	2.1338	142.2	18.8422
142.7	4.0436	142.3	7.8607	143	5.6696	141.9	13.9189	142.2	2.7597	142.3	19.2595
142.8	3.6001	142.4	8.3756	143.1	5.2536	142	12.3417	142.3	2.6298	142.4	19.3965
142.9	3.9291	142.5	8.0705	143.2	5.1296	142.1	12.1284	142.4	2.5094	142.6	19.7458
143	3.5107	142.6	7.9083	143.4	5.43	142.2	12.3191	142.6	2.29	142.7	20.6912
143.1	3.3414	142.8	8.6427	143.5	4.9293	142.4	12.4967	142.7	2.054	142.8	20.8676
143.3	4.0257	142.9	7.1895	143.6	4.7731	142.5	12.9974	142.8	2.5082	142.9	18.5704
143.4	3.227	143	8.2326	143.7	5.151	142.6	12.5456	142.9	1.6618	143	19.9199
143.5	3.4583	143.1	7.2443	143.9	4.2689	142.7	13.0677	143	1.5366	143.2	20.4313
143.6	2.1982	143.2	7.7057	144	5.2214	142.9	12.9235	143.1	2.3985	143.3	19.9425
143.7	2.4998	143.3	7.5781	144.1	4.4048	143	12.3119	143.3	1.8835	143.4	19.0687
143.9	2.5523	143.5	7.149	144.2	4.251	143.1	11.6861	143.4	1.8835	143.5	19.1832
144	2.3437	143.6	7.273	144.3	4.8316	143.2	12.8734	143.5	2.8145	143.6	17.6263
144.1	2.8896	143.7	6.8474	144.5	3.9291	143.3	10.947	143.6	2.6488	143.7	18.6813
144.2	2.5833	143.8	6.7985	144.6	4.6349	143.5	11.7576	143.7	2.6977	143.8	17.8671
144.3	2.5058	143.9	6.7246	144.7	5.1272	143.6	12.1272	143.9	2.6798	144	18.7743
144.4	2.7621	144.1	6.4206	144.8	5.548	143.7	9.4605	144	2.7406	144.1	18.3105
144.6	3.3617	144.2	6.671	144.9	4.8721	143.8	11.3726	144.1	2.532	144.2	18.059
144.7	3.8838	144.3	7.0107	145.1	5.2428	143.9	11.6515	144.2	2.2209	144.3	17.3271
144.8	4.0162	144.4	7.2289	145.2	6.2943	144	11.4691	144.3	2.203	144.4	18.0817
144.9	3.8171	144.5	8.1313	145.3	6.1691	144.2	11.4524	144.4	1.44	144.6	17.8647
145	3.2425	144.6	8.2695	145.4	6.5982	144.3	11.5681	144.5	0.8976	144.7	18.9471
145.1	3.4261	144.8	8.9479	145.5	6.7043	144.4	10.3879	144.7	1.1075	144.8	18.3475
145.3	4.8518	144.9	9.414	145.6	6.6853	144.5	11.3499	144.8	1.1444	144.9	19.424
145.4	3.978	145	8.6784	145.8	7.6199	144.6	9.7168	144.9	0.9382	145	18.2939
145.5	3.3522	145.1	9.8217	145.9	6.7103	144.7	11.5776	145	1.4865	145.1	18.5406
145.6	3.562	145.2	10.3116	146	7.1275	144.9	9.8753	145.1	1.2636	145.2	18.3678
145.7	3.6907	145.4	9.5475	146.1	6.6698	145	10.5608	145.2	1.6296	145.4	18.487
145.9	4.3762	145.5	9.4998	146.2	6.5732	145.1	8.9765	145.4	2.2399	145.5	18.0686
146	2.9314	145.6	9.6393	146.4	6.243	145.2	9.1958	145.5	1.2362	145.6	19.4371
146.1	3.6252	145.7	9.2638	146.5	5.2547	145.4	7.8654	145.6	1.93	145.7	17.1936
146.2	3.3355	145.8	9.3663	146.6	4.9007	145.5	9.0063	145.7	1.2267	145.8	18.5597
146.3	3.4809	146	8.9526	146.7	4.015	145.6	7.8535	145.8	1.2136	146	18.7421
146.5	3.525	146.1	9.4914	146.8	4.3428	145.7	7.5006	146	1.9205	146.1	18.5847
146.5	3.655	146.2	9.0301	146.9	4.1974	145.8	6.125	146.1	1.3041	146.2	18.0602
146.7	3.4833	146.3	9.0873	147	2.8718	145.9	7.1692	146.2	1.4794	146.3	16.6833
146.8	4.425	146.4	8.8727	147.2	2.7776	146.1	6.6328	146.3	0.8559	146.4	17.8111
146.9	4.4739	146.5	9.0337	147.3	3.0518	146.2	5.6577	146.4	0.6247	146.6	16.5534
147	4.5526	146.7	8.6665	147.4	3.5203	146.3	6.6412	146.5	0.3028	146.7	16.042
147.2	4.729	146.8	8.7512	147.5	3.314	146.4	6.3097	146.7	0.2849	146.8	18.1592
147.3	5.4324	146.9	8.5211	147.7	3.7873	146.5	7.838	146.8	0.9966	146.9	16.6893
147.4	5.4383	147	9.1815	147.8	3.5262	146.7	7.8428	146.9	0.2313	147	17.1161
147.5	5.6851	147.1	8.4949	147.9	3.494	146.8	7.3063	147	0.025	147.1	16.8729
147.6	5.3442	147.2	8.4639	148	4.1461	146.9	8.5938	147.1	-0.0238	147.3	17.345
147.7	4.7278	147.3	8.0395	148.1	3.6478	147	9.5081	147.2	-0.6783	147.4	17.3128
147.8	4.5097	147.5	7.9381	148.3	4.2892	147.1	10.8552	147.3	-0.4518	147.5	17.8409
148	4.7481	147.6	8.3351	148.4	4.0185	147.2	10.6537	147.5	-0.5507	147.6	16.9814
148.1	4.6957	147.7	7.5305	148.5	4.3106	147.3	10.7992	147.6	-0.5972	147.7	17.643
148.2	3.1877	147.8	7.8654	148.6	4.3893	147.5	10.4928	147.7	-0.9477	147.8	17.3569
148.3	3.4261	147.9	7.1728	148.7	4.2057	147.6	11.3606	147.8	-0.8881	147.9	16.9015
148.4	2.9898	148.1	6.8867	148.8	4.0543	147.7	10.1709	148	-0.2789	148.1	16.0313
148.6	2.6667	148.2	8.3673	149	4.164	147.8	10.8218	148.1	0.416	148.2	16.4127
148.7	2.8658	148.3	8.1146	149.1	3.4344	147.9	10.7825	148.2	0.3195	148.3	15.7201
148.8	1.8799	148.4	8.2314	149.2	4.518	148	9.5987	148.3	0.4411	148.4	15.3554
148.9	2.3246	148.5	8.2111	149.3	2.9731	148.2	10.4713	148.4	-0.0608	148.5	13.9308
149	2.6715	148.7	7.1263	149.4	4.0162	148.3	10.7741	148.5	1.2636	148.6	15.4817
149.1	2.2388	148.8	7.4625	149.6	3.4702	148.4	11.1508	148.7	1.3912	148.8	15.9168
149.3	2.3246	148.9	7.4494	149.7	3.6848	148.5	10.5822	148.8	0.8023	148.9	16.5141
149.4	3.2747	149	6.4695	149.8	3.8445	148.7	10.7765	148.9	0.577	149	17.0159
149.5	3.3665	149.1	6.7496	149.9	3.5203	148.8	11.7314	149	0.6104	149.1	17.0827
149.6	3.2437	149.2	6.1941	150	3.6621	148.9	11.9007	149.1	0.3588	149.2	17.5476
149.7	3.3379	149.3	5.8281	150.2	3.4559	149	12.3656	149.2	0.2182	149.4	18.7373
149.8	3.2341	149.5	5.5134	150.3	2.6858	149.1	12.5694	149.4	-0.422	149.5	19.0687
150	2.9016	149.6	5.8591	150.4	4.2367	149.2	13.0498	149.5	-0.9859	149.6	19.5181
150.1	3.8373	149.7	5.6887	150.5	3.3414	149.4	13.7627	149.6	-0.3958	149.7	19.8507
150.2	3.742	149.8	5.852	150.6	3.5262	149.5	13.9451	149.7	-0.2956	149.8	20.6232
150.3	3.2425	149.9	5.0187	150.7	3.1257	149.6	13.9999	149.8	0.5543	149.9	20.0629
150.4	3.0911	150	6.0534	150.9	3.7754	149.7	14.3576	150	-1.3959	150	20.7436
150.6	2.8229	150.2	5.3942	151	4.009	149.8	13.1094	150.1	0.3409	150.2	18.8088
150.7	3.1817	150.3	5.4181	151.1	3.1173	149.9	14.9977	150.2	0.0513	150.3	19.9211
150.8	3.4988	150.4	5.5504	151.2	2.7132	150.1	14.7712	150.3	0.4959	150.4	20.7293
150.9	3.1149	150.5	5.8794	151.3	2.8121	150.2	14.2336	150.4	0.6986	150.5	20.8676
151	3.6585	150.6	5.4801	151.5	2.5678	150.3	14.5757	150.5	0.0584	150.6	19.9437
151.1	3.5763	150.7	6.0236	151.6	3.773	150.4	12.8102	150.6	0.0823	150.7	18.5895
151.3	4.4847	150.8	6.1047	151.7	3.1698	150.5	13.8128	150.8	0.2861	150.9	18.7933
151.4	4.2784	151	5.9676	151.8	3.3307	150.7	12.7113	150.8	-0.1907	151	18.2676
151.5	4.6909	151.1	6.839	151.9	2.96	150.8	13.1845	151	0.8333	151.1	18.7802
151.6	5.5444	151.2	6.7532	152	3.6561	150.9	13.9833	151.1	0.9131	151.2	18.4703
151.7	5.7054	151.3	6.423	152.2	3.6776	151	12.2547	151.2	0.571	151.3	17.6978
151.8	5.9807	151.4	7.2157	152.3	4.9365	151.1	13.1226	151.3	1.2684	151.5	17.2687
151.9	5.8723	151.6	6.5327	152.4	4.2689	151.2	13.3002	151.5	1.0169	151.6	18.1842
152.1	5.8341	151.7	6.6984	152.5	4.5598	151.3	13.1285	151.6	1.1408	151.7	18.2509
152.2	5.7876	151.8	6.5863	152.6	3.7265	151.4	13.2716	151.7	1.6081	151.8	18.6384
152.3	5.9021	151.9	6.0284	152.7	4.1676	151.6	13.7389	151.8	1.7357	151.9	19.0485
152.4	5.97	152	5.6958	152.8	4.2176	151.7	14.3874	151.9	1.3804	152	19.381
152.5	4.4703	152.1	5.4002	153	4.1223	151.8	13.6113	152	1.5867	152.2	18.2819
152.7	4.828	152.3	5.784	153.1	4.1723	151.9	14.2062	152.2	1.1289	152.3	19.4871
152.8	4.1306	152.4	6.094	153.2	4.108	152	13.7317	152.3	2.0099	152.4	18.0459
152.9	4.7719	152.5	5.7983	153.3	3.5989	152.2	14.0381	152.4	1.3268	152.5	18.7457
153	4.0746	152.6	6.4147	153.4	4.8089	152.3	14.7104	152.5	1.322	152.6	19.0556
153.1	4.4394	152.7	6.0296	153.5	3.7575	152.4	13.2561	152.6	1.8179	152.7	18.4464
153.2	4.6551	152.8	7.0167	153.7	2.7645	152.5	13.9213	152.8	1.6391	152.8	15.8978
153.4	4.2963	152.9	6.6912	153.8	4.8113	152.6	13.1738	152.9	1.142	152.9	17.9052
153.5	4.0901	153	8.0001	153.9	4.3583	152.7	13.3109	153	2.2411	153.1	17.7395
153.6	4.0901	153.2	8.0001	154	3.494	152.9	12.6898	153.1	2.178	153.2	15.3911
153.7	4.0746	153.3	7.6842	154.1	3.5799	153	12.5551	153.2	2.2793	153.3	17.3652
153.8	3.9029	153.4	8.5199	154.2	2.7525	153.1	11.971	153.3	1.5855	153.4	16.6404
154	4.1139	153.5	7.9417	154.4	4.2665	153.2	12.3775	153.5	1.6701	153.5	16.0205
154.1	3.8719	153.7	7.9179	154.5	3.3522	153.3	11.6026	153.6	1.7846	153.7	16.2613
154.2	3.0673	153.8	8.2934	154.6	3.9828	153.4	11.1938	153.7	-0.2086	153.8	16.1767
154.3	3.7253	153.9	7.9358	154.7	4.5252	153.6	11.0078	153.8	1.7762	153.9	15.6975
154.4	3.5214	154	7.9763	154.8	3.8552	153.7	9.9421	153.9	1.4424	154	17.1018
154.5	3.3939	154.1	8.0037	155	4.257	153.8	10.1876	154.1	1.2994	154.1	16.0933
154.6	3.2258	154.2	7.5412	155.1	4.4417	153.9	10.3283	154.2	1.5712	154.2	14.7963
154.7	2.8503	154.4	7.5221	155.2	3.6395	154	9.4557	154.3	1.8322	154.3	16.3829
154.9	2.3234	154.4	7.5734	155.3	5.3704	154.1	10.041	154.4	2.439	154.5	16.2041
155	3.2878	154.6	6.994	155.4	3.9971	154.2	9.3007	154.5	1.9062	154.6	16.5617
155.1	2.4092	154.7	8.0657	155.5	4.0424	154.4	9.1493	154.7	2.0289	154.7	17.122
155.2	2.8181	154.8	7.6437	155.7	5.1749	154.5	8.9347	154.8	1.9979	154.8	16.8777
155.3	3.2115	154.9	8.2111	155.8	3.9351	154.6	8.0764	154.9	1.8728	154.9	17.519
155.5	3.8612	155	8.1551	155.9	3.7754	154.7	9.8002	155	1.5998	155.1	17.5929
155.6	3.1865	155.2	7.6461	156	5.3823	154.8	10.5011	155.1	2.0456	155.2	17.8993
155.7	3.7003	155.3	7.9513	156.1	3.8683	155	9.228	155.2	1.682	155.3	17.3175
155.8	4.8077	155.4	8.39	156.2	5.7673	155.1	11.2295	155.3	1.2386	155.4	18.1341
155.9	4.7338	155.5	7.8857	156.4	5.2154	155.2	11.2486	155.5	1.1027	155.5	18.0721
156	5.1105	155.6	8.4686	156.5	5.0914	155.3	12.3286	155.6	0.8893	155.6	17.6263
156.2	5.6458	155.7	8.1742	156.6	5.2142	155.4	13.026	155.7	-0.1776	155.8	18.0209
156.3	5.7304	155.9	8.4722	156.7	5.821	155.6	12.2106	155.8	0.6831	155.9	18.3833
156.4	5.9068	156	8.6188	156.8	5.7375	155.6	13.3836	155.9	0.1836	156	18.0197
156.5	6.5064	156.1	8.0657	157	5.3692	155.8	14.0369	156	-0.1919	156.1	17.9529
156.6	5.8138	156.2	8.8871	157.1	5.2285	155.9	13.6566	156.1	0.1657	156.2	18.152
156.7	5.4765	156.3	8.651	157.2	5.3537	156	13.9534	156.3	-0.3505	156.3	18.8172
156.9	6.2501	156.5	9.2649	157.3	5.2881	156.1	11.6241	156.4	0.4315	156.4	17.823
157	5.2071	156.6	9.582	157.4	5.4204	156.2	13.0022	156.5	0.2098	156.6	16.8896
157.1	4.4787	156.7	9.6178	157.5	5.3978	156.4	12.9986	156.6	0.7427	156.7	17.0887
157.2	4.4847	156.8	10.0279	157.7	6.0022	156.5	10.8814	156.7	0.3684	156.8	17.2162
157.3	5.1904	156.9	9.6011	157.8	5.1117	156.6	12.089	156.9	1.0955	156.9	16.9432
157.4	4.5764	157	9.557	157.9	5.6124	156.7	12.1665	156.9	0.0989	157	16.2756
157.5	4.7898	157.1	10.0398	158	6.7282	156.8	11.3809	157.1	-0.3242	157.1	16.1243
157.7	4.0519	157.3	9.197	158.1	5.2142	156.9	10.7956	157.2	1.1456	157.3	16.2017
157.8	4.5359	157.4	9.1696	158.2	6.0105	157.1	11.723	157.3	1.092	157.4	14.9488
157.9	3.5036	157.5	10.1864	158.4	5.7054	157.2	10.8373	157.4	1.384	157.5	17.4975
158	3.7396	157.6	9.8038	158.5	5.1379	157.3	11.5907	157.5	0.6378	157.6	16.315
158.1	2.9004	157.7	10.2317	158.6	5.1904	157.4	11.9078	157.7	1.7667	157.7	15.5771
158.2	2.5308	157.8	9.7966	158.7	4.4286	157.5	11.4739	157.8	1.3471	157.8	17.6299
158.4	2.5511	157.9	10.1674	158.8	4.7565	157.7	10.9017	157.9	0.4995	158	17.0457
158.5	2.0969	158.1	9.867	159	4.0209	157.8	10.0732	158	2.0814	158.1	17.2234
158.6	1.6332	158.2	10.3319	159.1	4.3845	157.9	12.5563	158.1	0.8678	158.2	17.5762
158.7	2.0397	158.3	10.3033	159.2	3.2103	158	11.6861	158.2	0.6723	158.3	16.4855
158.9	1.6463	158.4	9.7454	159.3	3.6848	158.1	11.2116	158.4	0.2301	158.4	17.2842
159	1.415	158.5	10.3557	159.4	2.9111	158.2	10.612	158.4	-0.2682	158.5	16.1362
159.1	1.8561	158.7	10.246	159.5	3.0088	158.3	10.4439	158.6	-0.3421	158.6	16.4151
159.2	2.3603	158.8	9.805	159.7	3.0911	158.5	11.0769	158.7	0.0191	158.7	16.4521
159.3	1.0753	158.9	10.0815	159.8	2.7144	158.6	11.456	158.8	-0.037	158.9	14.199
159.4	1.6606	159	9.5725	159.9	2.9993	158.7	10.8409	158.9	0.4506	159	15.7464
159.5	1.2612	159.1	9.2149	160	3.2556	158.8	11.2629	159	0.9525	159.1	16.048
159.7	2.3139	159.2	9.4736	160.1	3.8135	158.9	10.2365	159.2	1.6427	159.2	15.4066
159.8	2.2006	159.4	8.7869	160.2	3.6871	159	10.3664	159.3	1.6034	159.3	16.0527
159.9	2.2054	159.5	8.508	160.4	4.741	159.2	9.8705	159.4	2.0039	159.4	16.5117
160	2.4927	159.6	8.8942	160.5	5.4145	159.3	9.644	159.5	2.6274	159.5	15.9478
160.1	3.1841	159.7	7.8189	160.6	5.7828	159.4	9.6226	159.6	2.5785	159.7	16.6869
160.2	3.1066	159.8	8.8954	160.7	5.5528	159.5	9.7919	159.7	3.1054	159.8	17.0624
160.4	3.9506	159.9	8.7166	160.8	6.5517	159.6	8.8358	159.8	3.0458	159.9	16.9253
160.5	3.1269	160.1	8.4174	160.9	6.8855	159.7	8.353	160	3.14	160	16.8598
160.6	3.4678	160.2	8.5437	161	6.4313	159.8	8.7583	160.1	2.8586	160.1	16.8979
160.7	3.6836	160.3	8.4913	161.2	7.1943	160	10.953	160.2	2.1827	160.2	16.7406
160.8	4.4787	160.4	8.4674	161.3	6.1965	160.1	10.5214	160.3	1.8728	160.4	17.1173
160.9	4.4191	160.5	8.7774	161.4	6.2895	160.2	9.3353	160.4	0.8059	160.5	16.1731
161	3.655	160.6	8.8239	161.5	5.6243	160.3	10.6406	160.6	1.6654	160.6	16.2685
161.2	3.8481	160.8	9.5809	161.6	5.7173	160.4	11.8577	160.7	1.725	160.7	16.4294
161.3	4.5931	160.9	9.7609	161.7	5.8913	160.5	11.8673	160.8	0.571	160.8	16.7751
161.4	3.9792	161	9.6381	161.8	4.8983	160.7	12.6946	160.9	0.1645	160.9	16.6762
161.5	4.0936	161.1	10.6871	162	5.0843	160.8	13.0081	161	0.5579	161	16.2578
161.6	4.5908	161.2	10.6299	162.1	5.2869	160.9	11.7588	161.1	0.4601	161.1	16.588
161.8	4.0412	161.3	10.4225	162.2	5.3644	161	13.7901	161.2	0.1025	161.3	16.1755
161.9	5.2547	161.4	10.6907	162.3	5.8854	161.1	13.6638	161.3	0.9036	161.4	16.8777
162	4.5466	161.5	10.2723	162.4	4.9675	161.2	12.275	161.5	0.2527	161.5	16.7584
162.1	5.5099	161.7	10.6645	162.5	5.1713	161.4	12.784	161.6	-0.1168	161.6	16.9599
162.2	4.7946	161.8	9.2959	162.8	5.6744	161.5	13.3383	161.7	1.4448	161.7	16.5594
162.3	5.3787	161.9	9.4545	162.9	5.5349	161.6	13.361	161.8	-0.515	161.8	16.7298
162.5	5.0187	162	9.0301	163	5.7626	161.7	12.1331	161.9	1.3912	162	17.9124
162.5	4.5109	162.1	9.1398	163.1	6.2275	161.8	11.9829	162	1.8167	162.1	18.1031
162.8	4.3583	162.3	8.8382	163.2	5.9021	161.9	11.5991	162.2	0.9215	162.2	18.5883
162.9	4.0996	162.3	8.5604	163.3	5.0986	162	11.4191	162.3	2.4307	162.3	18.1854
163	4.3929	162.5	8.769	163.4	5.8913	162.2	11.4238	162.4	2.526	162.4	18.6718
163.1	3.4094	162.6	8.4198	163.6	6.1226	162.3	11.6503	162.5	2.9719	162.5	18.8494
163.3	4.3261	162.8	8.8727	163.7	6.0117	162.4	11.22	162.6	2.7752	162.8	18.574
163.4	4.1056	162.9	9.4104	163.8	5.9497	162.5	11.2998	162.8	2.4438	162.9	17.9327
163.5	3.9542	163	9.681	163.9	5.3263	162.6	11.0233	162.9	3.3426	163	18.4798
163.6	3.9828	163.1	10.0982	164	5.1284	162.8	12.1617	163.1	3.2294	163.1	18.8017
163.7	4.6623	163.3	9.3663	164.2	4.9412	162.9	12.4741	163.2	3.5095	163.2	17.2639
163.8	4.1676	163.4	10.2496	164.3	4.5681	163.1	12.157	163.3	2.954	163.3	15.9824
163.9	4.7183	163.5	10.097	164.4	4.2868	163.2	13.1416	163.4	3.0136	163.4	16.3519
164.1	4.7696	163.6	10.5417	164.5	4.0531	163.3	13.8223	163.5	3.7122	163.5	15.9693
164.2	6.1607	163.7	10.3009	164.6	3.7539	163.4	11.915	163.6	3.6573	163.7	16.9098
164.3	5.8639	163.8	10.6621	164.8	4.7088	163.6	15.0323	163.7	3.6037	163.8	16.7227
164.4	5.4204	164	10.0946	164.8	2.9814	163.7	14.2729	163.8	3.5763	163.9	15.8429
164.5	5.6827	164.1	10.2007	165	3.6824	163.8	14.4959	164	3.7241	164	15.9299
164.6	5.4753	164.2	9.9599	165.1	3.4702	163.9	13.3717	164.1	2.8574	164.1	16.4521
164.8	4.5645	164.3	9.9432	165.2	3.0386	164	13.7174	164.2	3.3522	164.2	17.7884
164.9	5.1343	164.4	9.7215	165.3	4.0078	164.1	13.4909	164.3	2.892	164.3	17.2687
165	4.1914	164.5	10.2282	165.5	5.281	164.2	12.188	164.4	2.3246	164.4	17.7443
165.1	3.3093	164.6	9.8372	165.6	5.0664	164.4	12.4323	164.6	2.8241	164.5	17.5416
165.2	4.2391	164.8	9.7394	165.7	4.9222	164.5	11.6491	164.7	2.0742	164.7	17.6215
165.3	3.2628	164.9	9.7668	165.8	5.5063	164.6	11.4727	164.8	1.8239	164.8	17.8587
165.4	2.2495	165	9.7966	165.9	5.4801	164.7	11.2259	164.9	1.3173	164.9	18.0507
165.6	3.0124	165.1	9.5952	166	5.6708	164.8	11.9615	165	1.6248	165	17.3414
165.7	2.7263	165.2	9.4473	166.1	5.0139	164.9	10.5906	165.1	1.7548	165.1	18.3344
165.8	3.5548	165.3	9.1422	166.3	5.5909	165.1	11.6038	165.3	1.3947	165.2	17.2091
165.9	1.9085	165.5	9.4998	166.4	4.6647	165.2	11.3487	165.4	0.6855	165.4	17.904
166	2.9695	165.6	9.1481	166.5	4.8733	165.3	11.4059	165.5	1.8668	165.5	17.0064
166.1	3.2699	165.7	9.4247	166.6	4.6563	165.4	12.3394	165.6	1.4746	165.6	17.6072
166.2	4.0603	165.8	9.0492	166.7	4.406	165.5	11.7993	165.7	2.0516	165.7	16.83
166.3	4.5311	165.9	9.166	166.8	5.0986	165.6	13.1369	165.8	2.1219	165.8	16.9766
166.4	4.1866	166	8.9085	166.9	4.9555	165.7	12.6529	165.9	1.806	165.9	15.8346
166.6	4.4167	166.1	9.4724	167	4.977	165.9	12.213	166.1	1.1718	166	18.0423
166.7	5.3597	166.2	8.837	167.2	5.554	166	13.4504	166.2	1.93	166.2	17.7634
166.8	4.9484	166.4	8.8882	167.3	4.6372	166.1	12.9592	166.3	1.4925	166.3	17.5953
166.9	4.9746	166.5	8.5795	167.4	4.3488	166.2	13.5136	166.4	1.6475	166.4	17.4606
167	4.9448	166.6	8.7953	167.5	5.0521	166.3	14.2562	166.5	0.9561	166.5	18.028
167.1	5.6374	166.7	8.3613	167.6	4.5049	166.4	13.0653	166.6	0.5186	166.6	17.1244
167.3	5.6434	166.8	8.2946	167.7	5.244	166.5	12.4407	166.8	0.6425	166.7	17.7002
167.4	5.3811	166.9	8.1646	167.9	4.3035	166.7	12.4884	166.9	-0.174	166.8	17.3473
167.5	5.0426	167.1	7.8917	168	3.8838	166.8	12.2666	167	-0.4947	166.9	17.3426
167.6	6.0844	167.2	7.5722	168.1	3.9589	166.9	11.971	167.1	-0.7546	167	18.0829
167.7	5.7936	167.3	8.1277	168.2	3.5799	167	10.7849	167.2	-0.1907	167.1	18.8589
167.8	6.7461	167.4	7.8368	168.3	3.8707	167.1	11.5526	167.3	-0.1454	167.2	18.4405
168	5.4824	167.5	7.8547	168.4	3.4988	167.2	11.9531	167.4	-0.2575	167.4	18.0435
168.1	6.6698	167.6	8.167	168.6	2.7931	167.4	10.9315	167.5	-0.1049	167.5	18.9853
168.2	7.1847	167.8	7.7832	168.6	3.413	167.5	11.6014	167.7	-0.2015	167.6	18.9984
168.3	6.1357	167.9	7.7415	168.8	3.1221	167.6	10.6132	167.8	0.2062	167.7	18.9912
168.4	7.5555	168	8.3363	168.9	4.5931	167.7	10.0994	167.9	0.0894	167.8	19.4037
168.5	7.9417	168.1	7.5161	169	3.8528	167.8	11.7135	168	0.4745	167.9	18.8446
168.6	7.2265	168.2	7.9525	169.1	3.4606	167.9	11.2987	168.1	-0.3564	168	19.7804
168.7	7.7772	168.3	7.5352	169.2	4.2474	168	11.3344	168.2	-0.211	168.1	19.3656
168.9	8.1098	168.4	7.9715	169.3	4.6229	168.1	12.2881	168.3	-0.4447	168.3	19.0365
169	7.8511	168.5	8.1396	169.6	5.9271	168.3	12.2178	168.5	-0.5925	168.4	20.2119
169.1	7.2229	168.7	8.0085	169.7	5.2893	168.4	12.3549	168.6	-0.4315	168.5	19.8925
169.2	7.1585	168.8	8.4722	169.8	5.9724	168.5	12.5241	168.7	-0.1752	168.6	19.3775
169.3	6.6793	168.9	8.0669	169.9	5.374	168.6	12.7268	168.8	-0.1824	168.7	18.8088
169.5	7.4661	169	8.1503	170	6.3109	168.7	12.4455	168.9	-0.211	168.8	18.8279
169.7	6.4147	169.1	8.8513	170.1	6.8104	168.8	13.4349	169	-0.4613	169	19.2356
169.8	6.5053	169.2	8.9002	170.2	5.7757	169	12.4717	169.1	-0.1585	169.1	18.4071
169.9	6.0248	169.5	8.8525	170.3	6.6745	169.1	12.0592	169.3	-0.3588	169.2	18.7194
170	6.2847	169.6	8.6486	170.5	5.7566	169.2	11.7707	169.5	-0.478	169.3	17.1125
170.1	5.3155	169.7	9.743	170.6	6.7031	169.3	12.4836	169.6	-1.0943	169.5	18.4035
170.2	5.8186	169.8	9.0897	170.7	6.2132	169.5	12.2213	169.7	-1.241	169.6	17.8301
170.4	5.5838	169.9	9.5928	170.8	5.9056	169.6	11.7695	169.8	-1.2708	169.7	18.4464
170.5	6.2025	170	9.954	170.9	6.1929	169.7	11.8291	169.9	-0.7796	169.9	18.1413
170.6	6.2263	170.1	10.1376	171.1	6.1142	169.9	12.6076	170	-0.4065	170	17.6501
170.7	5.4014	170.3	11.2236	171.2	5.6505	170	12.2249	170.1	-0.1335	170.1	17.2091
170.8	5.8901	170.4	11.4226	171.3	5.6875	170.1	12.7876	170.3	0.0036	170.2	17.4403
170.9	5.6219	170.5	10.8695	171.4	5.4991	170.2	12.2297	170.4	0.639	170.3	17.7693
171	5.182	170.6	11.9913	171.5	5.3525	170.3	12.3775	170.5	1.1325	170.4	17.9279
171.2	4.9353	170.7	12.0413	171.6	4.7648	170.4	11.9269	170.6	1.5771	170.5	17.7348
171.3	4.0424	170.8	12.3751	171.8	5.8413	170.6	11.6479	170.7	2.3639	170.7	17.2508
171.4	4.5621	170.9	12.9521	171.9	4.8435	170.7	9.6262	170.8	3.3283	170.8	18.1043
171.5	4.0042	171.1	12.7351	172	4.6337	170.8	10.7634	170.9	2.9254	170.9	17.7503
171.6	4.6444	171.2	12.0175	172.1	4.7565	170.9	11.2462	171.1	2.9838	171	18.5752
171.8	4.3678	171.3	12.6112	172.2	5.2738	171	9.7287	171.2	2.4986	171.1	18.3427
171.9	4.6909	171.4	11.6813	172.4	5.6338	171.1	9.1767	171.3	3.1853	171.2	18.0161
172	4.4668	171.5	12.1808	172.5	5.1785	171.2	10.2091	171.4	2.9564	171.3	18.3213
172.1	4.7255	171.7	11.7743	172.6	5.3108	171.3	12.0461	171.5	3.0398	171.4	18.4023
172.2	4.4489	171.8	11.3583	172.7	5.6899	171.5	12.0354	171.6	2.7943	171.6	18.58
172.4	4.7064	171.9	11.8756	172.8	6.1941	171.6	12.3918	171.7	2.2638	171.7	18.1019
172.5	4.9961	172	11.0281	172.9	6.7115	171.7	12.0544	171.9	2.7239	171.8	17.4463
172.6	5.5122	172.1	11.2283	173	7.7105	171.8	11.9531	172	1.9753	171.9	17.5929
172.7	5.0783	172.2	10.4499	173.2	6.9129	171.9	13.1452	172.1	1.9336	172	18.2843
172.8	5.3763	172.3	10.2711	173.3	6.2871	172.1	13.8581	172.2	2.0838	172.1	17.8552
172.9	5.8961	172.4	10.0243	173.4	7.1216	172.2	13.9081	172.3	2.5666	172.2	19.2392
173	6.1703	172.5	9.2208	173.5	7.2789	172.3	13.6185	172.4	1.8597	172.3	19.1414
173.1	6.6757	172.7	9.0528	173.6	7.9918	172.4	12.8281	172.5	1.8275	172.5	20.0403
173.2	6.7127	172.8	9.2304	173.7	7.4196	172.5	11.4501	172.7	2.2769	172.6	19.6958
173.4	7.894	172.9	8.9049	173.8	8.738	172.6	14.2932	172.8	2.5332	172.7	19.4871
173.5	7.5388	173	8.7535	173.9	8.0025	172.7	14.2562	172.9	2.6584	172.8	19.4275
173.6	7.0047	173.1	8.7821	174.1	7.6723	172.9	14.1978	173	2.811	172.9	19.1665
173.7	6.696	173.2	9.0647	174.2	7.0333	173	13.8116	173.1	2.4557	173	19.4204
173.8	5.9366	173.4	9.0849	174.3	6.9904	173.1	14.1835	173.2	2.3687	173.1	18.8768
173.9	6.5422	173.5	8.8644	174.4	7.1609	173.2	13.8688	173.3	2.228	173.3	18.5156
174	5.7685	173.6	9.0992	174.5	6.3062	173.3	15.1455	173.5	1.8728	173.4	18.0578
174.1	4.8733	173.7	9.3079	174.7	6.1679	173.4	12.6112	173.6	2.4807	173.5	17.6728
174.3	4.7767	173.8	8.6844	174.8	5.2202	173.6	14.0035	173.7	2.0194	173.6	18.6682
174.4	3.4535	173.9	9.2769	174.9	5.5718	173.6	13.8712	173.8	2.4688	173.7	18.4119
174.5	3.3581	174.1	8.9908	175	5.4073	173.8	13.3538	173.9	2.3878	173.8	18.3201
174.6	3.4845	174.2	9.3842	175.1	4.5764	173.9	12.5527	174	1.6117	173.9	18.94
174.7	3.1412	174.3	9.2411	175.2	5.0664	174	13.1309	174.2	1.7571	174.1	19.5813
174.8	3.078	174.4	10.0517	175.3	4.9055	174.1	12.66	174.3	2.6393	174.2	18.6563
175	3.0732	174.5	7.776	175.4	4.7481	174.2	13.8319	174.4	2.5654	174.3	19.1498
175	2.9755	174.6	8.5962	175.6	5.1439	174.4	12.3703	174.5	2.11	174.4	20.1845
175.2	2.4378	174.8	7.9477	175.7	5.0688	174.5	12.9974	174.6	2.4378	174.5	18.0054
175.3	3.2759	174.9	8.018	175.8	5.6148	174.6	12.0246	174.7	3.1304	174.6	19.66
175.4	3.6263	175	8.5151	175.9	5.3155	174.7	12.4621	174.8	2.7192	174.7	19.6648
175.5	3.7181	175.1	8.1372	176.2	6.0272	174.8	12.7399	175	2.7263	174.8	19.0318
175.6	4.3046	175.2	8.9943	176.2	5.0521	174.9	12.9879	175.1	2.0134	174.9	18.8267
175.8	3.68	175.3	8.328	176.4	5.2774	175	12.6028	175.2	3.3283	175	19.238
175.9	4.5609	175.4	8.7392	176.5	6.0558	175.2	11.9698	175.3	3.1769	175.2	18.9722
176.1	4.3976	175.5	8.179	176.6	5.2917	175.3	11.6837	175.4	2.8241	175.3	19.0198
176.2	5.1606	175.7	9.532	176.7	5.4288	175.4	11.3595	175.5	3.0875	175.4	19.0949
176.3	5.182	175.8	8.7976	176.8	5.5814	175.5	12.2058	175.6	2.7883	175.5	18.9328
176.4	5.244	175.9	9.1064	176.9	5.1343	175.6	12.0008	175.8	3.1376	175.6	17.4987
176.5	6.1357	176.1	9.5677	177.1	5.7054	175.7	11.7278	175.9	2.1648	175.8	17.7109
176.6	5.275	176.2	9.9504	177.2	4.3154	175.8	11.9531	176.1	2.6846	175.9	16.9492
176.8	5.5337	176.3	10.3939	177.3	4.6074	176.1	11.5407	176.2	1.6248	176.1	17.1626
176.9	4.9639	176.4	9.9695	177.4	4.5526	176.2	13.2215	176.3	2.8396	176.2	17.482
177	4.9496	176.5	11.307	177.5	4.5347	176.3	12.8567	176.4	3.1984	176.3	18.0304
177.1	4.5931	176.7	12.064	177.6	5.1582	176.4	14.2324	176.5	2.6822	176.4	15.8191
177.2	4.6921	176.8	11.2772	177.8	6.218	176.5	14.0929	176.6	2.7323	176.5	18.0602
177.3	4.58	176.9	11.8518	177.9	5.343	176.6	14.8785	176.7	2.2292	176.6	18.4989
177.5	4.2772	177	12.1403	178	5.1486	176.7	13.9296	176.9	3.1936	176.7	18.8136
177.6	4.8757	177.1	12.0902	178.1	6.3479	176.8	16.1135	177	3.8517	176.9	19.0997
177.7	4.9984	177.2	12.5909	178.2	6.8271	177	15.7201	177.1	2.8896	177	19.9449
177.8	5.6231	177.4	11.9293	178.3	6.6447	177.1	16.0694	177.2	4.0448	177.1	19.1712
177.9	5.5826	177.5	12.1284	178.4	6.8998	177.2	16.8121	177.3	3.9196	177.2	19.6135
178	6.3503	177.6	11.977	178.6	8.3125	177.3	16.3472	177.4	3.8326	177.3	20.1416
178.1	5.8389	177.7	11.6575	178.7	6.9714	177.4	16.6607	177.5	4.164	177.4	20.2608
178.3	5.796	177.8	12.5158	178.8	7.0715	177.6	17.4487	177.6	2.7919	177.5	19.629
178.4	5.5265	177.9	11.7135	178.9	7.1299	177.7	15.7022	177.7	3.2079	177.7	20.1345
178.5	5.2035	178.1	10.7646	179	7.2324	177.8	16.7727	177.9	2.4676	177.8	19.8531
178.6	4.7755	178.2	11.8279	179.1	6.2501	177.9	16.2792	178	3.4165	177.9	18.5299
178.7	4.4012	178.3	12.325	179.2	5.8317	178	17.6299	178.1	3.0982	178	19.0377
178.8	3.9983	178.4	12.0187	179.4	5.4693	178.1	16.4759	178.2	3.6597	178.1	18.4834
178.9	3.4595	178.5	13.2847	179.5	4.7719	178.3	17.2508	178.3	2.8849	178.2	16.1612
179.1	3.041	178.6	12.3775	179.6	5.5909	178.4	15.7595	178.5	3.3855	178.3	18.0578
179.2	2.5654	178.8	13.5434	179.7	3.7313	178.5	15.7881	178.6	3.866	178.5	17.271
179.3	2.7788	178.9	12.6135	179.8	3.9434	178.6	15.583	178.7	3.1006	178.6	17.2663
179.4	3.1447	179	12.8531	179.9	3.9136	178.7	15.2552	178.8	4.3225	178.7	17.8814
179.5	2.7001	179.1	13.1583	180	4.0364	178.8	15.1563	178.9	4.0472	178.8	17.5488
179.6	3.1662	179.2	12.5146	180.2	2.7275	178.9	14.7259	179.1	3.9136	178.9	18.363
179.7	3.2496	179.3	11.5669	180.3	2.4986	179	15.5425	179.2	3.5214	179	19.4752
179.8	3.1245	179.4	11.8482	180.4	2.9194	179.1	15.0323	179.3	3.8648	179.1	19.3942
180	3.9423	179.5	11.456	180.5	3.1757	179.3	14.5304	179.4	2.8872	179.2	20.1023
180.1	3.9256	179.7	11.1008	180.6	3.6478	179.4	13.324	179.5	2.6762	179.3	20.9761
180.2	4.7803	179.8	10.7503	180.7	3.165	179.5	13.752	179.6	2.6178	179.5	21.2586
180.3	4.8649	179.9	10.4475	180.8	4.3225	179.6	14.044	179.7	1.2589	179.6	22.192
180.4	5.486	180	10.3486	181	4.1926	179.7	12.9545	179.9	2.1422	179.7	21.9858
180.5	5.0342	180.1	9.8777	181.1	4.7207	179.9	12.7566	180	1.1373	179.8	21.8976
180.7	5.4657	180.3	8.9324	181.2	6.2418	180	12.5265	180.1	0.0083	179.9	22.5854
180.8	4.6372	180.4	10.3045	181.3	5.9736	180.1	12.0735	180.2	1.0502	180	22.6009
180.9	4.648	180.5	9.7489	181.4	6.7043	180.2	12.9414	180.3	0.8833	180.2	22.4984
181	4.9543	180.6	9.9468	181.5	7.211	180.3	12.8162	180.4	-0.1001	180.3	21.9059
181.1	4.611	180.7	9.7883	181.6	7.6211	180.4	12.2535	180.5	1.0777	180.4	21.9715
181.2	4.7612	180.8	10.0911	181.7	7.5114	180.5	12.0449	180.7	1.1194	180.5	22.217
181.3	4.6706	180.9	10.2222	181.9	7.5805	180.7	12.1081	180.8	1.7023	180.6	21.1489
181.5	2.8753	181.1	9.737	182	8.0025	180.8	11.673	180.9	2.0289	180.7	21.2657
181.6	4.2617	181.2	10.4022	182.1	6.9368	180.9	10.6967	181	1.8895	180.8	19.9354
181.7	3.6407	181.3	11.0269	182.2	7.7939	181	9.3758	181.1	2.0921	180.9	19.2642
181.8	4.3571	181.4	11.9555	182.4	7.7248	181.1	8.7249	181.3	2.5082	181	20.2787
181.9	4.4489	181.5	10.1161	182.5	6.8665	181.2	8.4841	181.4	2.7144	181.2	18.7707
182	4.0281	181.6	11.4107	182.6	6.6829	181.3	8.5986	181.5	2.3365	181.3	18.8816
182.1	5.0879	181.7	11.2569	182.7	6.187	181.5	9.7477	181.6	2.8217	181.4	19.1665
182.2	4.2295	181.9	11.6062	182.8	6.4385	181.6	8.6451	181.7	2.2089	181.5	17.6394
182.4	5.0235	182	11.9925	182.9	6.0415	181.7	8.4603	181.8	2.0564	181.6	18.7063
182.5	5.7387	182.1	11.4691	183.1	5.7888	181.8	9.1815	181.9	2.2292	181.7	19.2344
182.6	5.1486	182.2	11.8184	183.2	4.518	181.9	9.3853	182.1	1.291	181.8	17.7217
182.7	6.2108	182.3	11.5836	183.3	4.6384	182	10.7598	182.2	0.8094	182	18.189
182.8	6.2621	182.4	11.5359	183.4	4.5371	182.1	11.4679	182.3	0.4768	182.1	19.4871
182.9	5.4204	182.5	11.3142	183.5	4.3452	182.2	11.5216	182.4	0.3219	182.2	18.8088
183	6.1369	182.7	12.0318	183.6	4.8256	182.4	11.5716	182.5	0.7319	182.3	18.5561
183.2	6.268	182.8	12.1164	183.8	5.1022	182.5	10.711	182.6	0.3123	182.4	18.4834
183.3	6.1178	182.9	13.0081	183.9	5.1785	182.6	12.1164	182.7	0.5722	182.5	18.4464
183.4	5.8556	183	12.8758	184	5.0139	182.7	12.4156	182.8	1.4877	182.6	18.2188
183.5	5.6767	183.1	13.7138	184.1	6.1905	182.8	12.9032	183	1.2875	182.7	18.6646
183.6	6.5947	183.2	13.6137	184.2	6.9618	182.9	12.5599	183.1	2.1696	182.9	18.0924
183.7	5.8353	183.3	13.8438	184.3	6.3312	183.1	13.5243	183.2	2.1482	183	18.4262
183.8	5.0783	183.5	13.3121	184.4	8.2982	183.2	13.2918	183.3	4.313	183.1	18.4691
183.9	4.3952	183.6	12.9056	184.6	8.0526	183.3	14.1346	183.4	4.7147	183.2	18.0769
184.1	5.4085	183.7	12.5766	184.7	8.4102	183.4	14.8404	183.5	4.6623	183.3	18.5716
184.2	4.5824	183.8	12.0258	184.8	7.9179	183.5	15.7452	183.6	4.6575	183.4	19.3965
184.3	4.8029	183.9	11.3821	184.9	7.6687	183.6	14.4196	183.7	4.8471	183.5	19.7446
184.4	4.5133	184	11.2879	185	7.5221	183.8	14.559	183.9	5.213	183.7	19.6767
184.5	4.5145	184.1	10.7574	185.1	7.1609	183.9	15.7809	184	4.319	183.8	20.02
184.6	3.7563	184.3	10.3533	185.3	7.6568	184	15.6748	184.1	3.5584	183.9	19.9938
184.8	4.5919	184.4	9.3949	185.4	7.6711	184.1	15.3053	184.2	3.1877	184	19.5503
184.9	4.0746	184.5	9.2876	185.5	6.7413	184.2	15.1169	184.3	2.9051	184.1	20.6971
185	3.9279	184.6	9.4521	185.6	5.9605	184.3	14.1752	184.4	1.4281	184.2	20.293
185.1	4.9782	184.7	9.2173	185.7	6.4862	184.4	13.8891	184.5	1.4019	184.3	21.0559
185.2	5.3096	184.9	8.2278	185.8	5.3036	184.5	14.2849	184.7	1.7464	184.4	20.6447
185.3	4.9591	185	9.34	185.9	5.6946	184.7	13.572	184.8	1.3101	184.6	21.7617
185.4	6.5327	185.1	9.3436	186.2	5.9283	184.8	13.7973	184.9	1.1802	184.7	21.0738
185.6	5.5528	185.2	9.4259	186.3	5.3203	184.9	12.8305	185	1.2219	184.8	21.3695
185.7	6.6876	185.3	9.5737	186.4	6.4647	185	12.7196	185.1	1.4925	184.9	21.565
185.8	6.2168	185.4	9.414	186.5	6.5422	185.1	11.8279	185.2	1.719	185	21.5602
185.9	6.3872	185.5	9.5677	186.6	6.7616	185.2	9.7191	185.3	2.65	185.1	21.6496
186.1	6.3276	185.6	9.7656	186.7	6.8462	185.4	11.5371	185.4	2.7335	185.3	21.8141
186.2	5.7018	185.8	10.2222	186.8	7.292	185.5	9.8062	185.6	2.3675	185.4	21.2848
186.4	6.4707	185.8	10.9625	187	7.453	185.6	9.3317	185.7	2.0528	185.5	20.3812
186.5	5.5039	185.9	10.469	187.1	8.4901	185.7	9.042	185.8	2.3365	185.6	21.6496
186.6	6.392	186.2	11.9293	187.2	8.39	185.8	9.4843	185.9	2.2864	185.7	21.6961
186.7	6.1595	186.3	12.4693	187.3	8.8918	185.9	9.2435	186.1	2.4521	185.8	21.044
186.8	5.1141	186.4	12.1355	187.4	8.7821	186.1	9.743	186.2	2.0182	185.9	20.9045
186.9	6.5565	186.5	12.8162	187.6	7.9644	186.2	10.6561	186.4	1.6987	186.2	21.0047
187	4.2045	186.6	12.3882	187.7	8.7035	186.4	11.0972	186.5	0.7641	186.2	20.7973
187.2	5.548	186.7	11.9007	187.8	8.2862	186.5	12.8424	186.6	1.148	186.4	20.4527
187.3	4.1187	186.8	12.7244	187.9	8.4996	186.6	14.6925	186.7	1.7548	186.5	20.9832
187.4	4.6325	187	12.4669	188	8.1539	186.7	13.9344	186.8	0.869	186.6	21.2896
187.5	4.1091	187.1	12.213	188.1	7.6032	186.8	14.1466	186.9	1.1325	186.7	21.8391
187.6	3.9089	187.2	11.847	188.2	7.571	186.9	17.2639	187	1.6248	186.8	22.428
187.7	4.0817	187.3	11.9674	188.4	8.1527	187	16.1743	187.2	1.7333	186.9	22.7058
187.8	3.3891	187.4	11.8196	188.5	6.8641	187.2	16.8169	187.3	1.9431	187.1	21.9464
188	3.2592	187.5	12.2952	188.6	6.994	187.3	16.4533	187.4	1.8263	187.2	22.7988
188.1	4.0925	187.7	12.2833	188.7	7.0989	187.4	14.7915	187.5	2.749	187.3	22.9299
188.2	2.7955	187.8	11.8423	188.8	5.7566	187.5	16.4711	187.6	3.5155	187.4	22.7845
188.3	4.0627	187.9	11.4417	188.9	6.187	187.6	15.4567	187.7	3.6108	187.5	22.7177
188.4	3.9124	188	11.1938	189.1	6.299	187.7	14.9	187.9	4.3917	187.6	24.8385
188.5	3.4654	188.1	12.1069	189.2	5.0592	187.8	14.0739	188	4.307	187.7	22.6271
188.6	3.4893	188.2	10.4678	189.3	6.0391	188	12.4598	188.1	4.0197	187.9	25.0864
188.8	4.4417	188.3	10.407	189.4	4.8923	188.1	13.9236	188.2	4.7326	188	23.8156
188.9	3.8898	188.5	10.2139	189.5	5.5945	188.2	11.9269	188.3	4.6134	188.1	23.9897
189	5.2142	188.6	9.5773	189.6	6.3193	188.3	13.6161	188.4	5.002	188.2	24.0123
189.1	3.7587	188.7	9.9671	189.7	5.0378	188.4	12.9581	188.6	4.2117	188.3	23.5033
189.2	4.4215	188.8	9.9373	189.8	6.0129	188.5	11.2498	188.7	4.369	188.4	22.3398
189.3	4.8721	188.9	9.6953	190	6.5029	188.7	13.2537	188.8	3.4845	188.5	22.8393
189.4	3.9005	189	9.3508	190.1	5.9617	188.8	13.1929	188.9	3.6359	188.6	22.3553
189.6	3.4094	189.2	10.221	190.2	6.4468	188.9	14.025	189	3.6168	188.7	21.5113
189.7	3.9971	189.3	9.9826	190.3	6.5088	189	12.9616	189.1	3.1459	188.9	20.4718
189.8	3.2806	189.4	10.7825	190.4	6.3598	189.1	14.5042	189.2	3.6275	189	19.486
189.9	3.7026	189.5	10.637	190.5	6.3038	189.2	14.9691	189.3	2.8908	189.1	19.3083
190	2.4891	189.6	11.0579	190.7	7.0369	189.3	15.8048	189.5	2.8765	189.2	18.698
190.1	3.5703	189.7	11.0793	190.8	5.6481	189.5	14.6365	189.6	4.0722	189.3	19.1975
190.2	3.8004	189.8	11.766	190.9	5.8889	189.6	15.0228	189.7	3.4094	189.4	18.2903
190.4	2.5892	190	11.8291	191	6.3932	189.7	15.2612	189.8	3.5119	189.5	19.1128
190.5	2.8205	190.1	11.8005	191.1	5.3906	189.8	14.5614	189.9	3.2413	189.6	18.785
190.6	3.4153	190.2	11.9329	191.2	5.4133	189.9	14.4529	190	3.4416	189.8	18.7719
190.7	2.3997	190.3	12.1391	191.4	5.8377	190	12.3167	190.1	3.0363	189.9	19.4454
190.8	2.7907	190.4	12.2225	191.5	6.1047	190.2	14.3838	190.3	3.7622	190	20.0224
190.9	1.8728	190.5	11.6503	191.6	6.001	190.3	14.3802	190.4	1.8311	190.1	20.9475
191.1	2.8491	190.6	11.3761	191.7	6.0952	190.4	12.9092	190.5	2.569	190.2	21.0786
191.2	2.9659	190.8	11.2748	191.8	7.0143	190.5	13.4981	190.6	2.4247	190.3	20.2704
191.3	2.5511	190.9	11.3046	191.9	7.0941	190.6	12.7244	190.7	1.1218	190.4	19.6648
191.4	3.6204	191	11.2426	192	7.1967	190.7	11.0781	190.8	1.6141	190.5	21.416
191.5	2.7215	191.1	11.0793	192.2	7.0083	190.8	12.3012	190.9	1.5223	190.6	19.9556
191.6	3.4642	191.2	10.8814	192.3	8.353	190.9	12.1188	191.1	1.1361	190.8	20.7865
191.7	3.4153	191.4	10.2246	192.4	7.6604	191	12.3274	191.2	1.1921	190.9	20.1631
191.9	1.9443	191.5	10.6561	192.5	8.6641	191.2	10.6537	191.3	0.7331	191	20.5088
192	3.8171	191.6	9.6023	192.6	8.3148	191.3	9.1088	191.4	1.4484	191.1	20.3252
192.1	3.0065	191.7	10.1209	192.7	9.2924	191.4	11.9829	191.5	1.0657	191.2	20.2096
192.2	3.885	191.8	10.3259	192.9	8.0299	191.5	9.1529	191.6	1.6427	191.3	20.3395
192.3	2.0945	191.9	10.1471	193	7.8821	191.6	11.9388	191.8	1.1396	191.5	19.6171
192.5	2.8491	192	9.3472	193.1	9.1314	191.7	11.9185	191.9	1.173	191.6	18.9269
192.6	2.7013	192.1	9.5165	193.2	8.7583	191.9	11.0078	192	1.8513	191.7	18.9161
192.7	2.7895	192.3	9.7823	193.3	8.9765	192	11.7505	192.1	0.7915	191.8	18.0602
192.8	3.37	192.4	9.3484	193.4	9.805	192.1	12.7125	192.2	1.4424	191.9	17.2055
192.9	2.9826	192.5	9.4414	193.6	9.352	192.2	13.1154	192.3	1.0443	192	18.7325
193	2.9683	192.6	9.2053	193.7	9.3758	192.3	13.7281	192.4	1.874	192.1	18.4441
193.1	3.6991	192.7	9.4152	193.8	9.0468	192.5	12.5706	192.6	2.0611	192.3	17.4594
193.3	3.7396	192.8	9.9397	193.9	9.284	192.6	12.9187	192.6	2.1541	192.4	18.3535
193.4	4.6861	192.9	9.8896	194	10.0577	192.7	13.0069	192.8	2.4498	192.5	18.8971
193.5	4.5252	193.1	10.3021	194.1	9.0134	192.8	12.8114	192.9	2.4784	192.6	20.0093
193.6	4.5633	193.2	11.0495	194.3	8.2636	192.9	12.933	193	2.4545	192.7	20.8747
193.7	4.7982	193.3	11.8279	194.4	9.4032	193	13.2418	193.1	2.768	192.8	20.678
193.8	4.9913	193.4	11.8339	194.5	8.9824	193.1	12.604	193.2	2.7251	192.9	21.77
193.9	4.7672	193.5	12.7196	194.6	9.4402	193.2	13.0832	193.4	2.4712	193	21.9917
194.1	5.0628	193.6	12.7959	194.7	9.5892	193.4	13.026	193.5	3.7289	193.1	22.3613
194.2	5.0867	193.7	12.9712	194.8	8.2028	193.5	12.7745	193.6	2.9159	193.3	22.6069
194.3	4.8757	193.8	13.2179	195	8.4209	193.6	11.5705	193.7	3.5524	193.4	22.0716
194.4	5.3358	194	13.6054	195.1	8.3768	193.7	12.3477	193.8	2.9778	193.5	20.9308
194.5	4.6742	194.1	13.572	195.2	7.2312	193.8	11.7445	193.9	3.6383	193.6	20.2549
194.6	5.2309	194.2	13.3264	195.3	8.0132	193.9	11.4751	194	3.8266	193.7	20.6053
194.8	5.5134	194.3	13.5434	195.4	7.4291	194.1	11.2069	194.1	4.1068	193.8	19.778
194.9	4.555	194.4	13.2024	195.5	6.8128	194.1	11.0698	194.3	3.8683	193.9	19.244
195	5.6887	194.5	12.7137	195.7	7.1239	194.3	11.1592	194.4	4.5824	194.1	18.6837
195.1	5.3406	194.7	12.9402	195.8	6.7937	194.4	12.8078	194.5	3.8755	194.2	18.4011
195.2	4.8339	194.8	12.3632	195.9	8.0609	194.5	11.7993	194.6	3.8767	194.3	18.357
195.3	5.1594	194.9	12.0747	196.1	8.0228	194.6	13.1464	194.7	3.7324	194.4	17.3724
195.5	5.9283	195	12.0199	196.2	6.6888	194.7	13.1607	194.8	3.6705	194.5	17.4892
195.6	5.2381	195.1	11.5788	196.3	8.3423	194.8	13.5648	195	3.5703	194.6	16.6821
195.7	6.0463	195.3	11.121	196.4	7.3361	195	14.6055	195.1	3.9673	194.7	17.2305
195.8	5.4479	195.4	11.4	196.6	7.3957	195.1	14.1549	195.2	3.3951	194.8	16.8109
195.9	5.8103	195.5	10.4547	196.7	8.4627	195.2	14.0786	195.3	3.2699	195	16.501
196.1	6.2084	195.6	10.8182	196.8	7.5221	195.3	14.4649	195.4	3.7277	195	16.1612
196.3	6.2799	195.7	11.1771	196.9	8.1623	195.4	13.659	195.5	3.4988	195.2	16.4986
196.4	5.8544	195.8	11.3583	197	7.4613	195.5	13.2382	195.6	4.3881	195.3	17.4856
196.5	5.4908	195.9	10.9422	197.1	6.9189	195.7	12.5027	195.8	4.0042	195.4	17.004
196.6	5.5742	196.2	11.3082	197.2	8.6236	195.8	11.5013	195.9	3.3033	195.5	17.2436
196.7	6.336	196.3	11.6134	197.4	6.9296	195.9	12.9044	196.1	3.7384	195.6	17.3032
196.8	5.7185	196.4	11.5597	197.5	6.5839	196.1	12.4836	196.2	3.4869	195.7	17.3199
196.9	5.3942	196.5	11.3904	197.6	6.566	196.2	11.7302	196.3	4.2593	195.9	18.0519
197.1	5.4514	196.6	11.5454	197.7	5.3608	196.3	12.43	196.4	3.3665	196.1	17.6859
197.2	5.2667	196.7	12.1653	197.8	6.1393	196.4	11.7898	196.5	4.1342	196.1	17.2758
197.3	5.1284	196.8	11.1818	197.9	5.5921	196.6	13.0069	196.7	3.8898	196.3	16.6667
197.4	5.0414	196.9	11.6968	198.1	5.9509	196.7	13.3097	196.8	3.1316	196.4	16.8133
197.5	4.7219	197.1	11.8434	198.2	5.1796	196.8	14.0369	196.9	4.1866	196.5	16.2625
197.6	4.5979	197.2	11.9615	198.3	5.7244	196.9	13.9427	197	4.0281	196.6	17.2055
197.7	3.7801	197.3	12.1629	198.4	5.0402	197	14.9083	197.1	3.9017	196.7	16.8836
197.8	4.0448	197.4	12.027	198.5	5.5325	197.1	13.9642	197.2	4.0126	196.9	17.0898
197.9	3.4523	197.5	12.4133	198.7	6.0451	197.2	13.9391	197.3	3.4368	197	17.3569
198.1	3.2341	197.6	12.5647	198.8	6.5804	197.3	15.5973	197.5	4.0674	197.1	16.5033
198.2	3.6764	197.8	12.8412	198.9	7.3433	197.5	16.923	197.6	3.0041	197.2	17.8349
198.3	3.2759	197.9	12.939	199	6.814	197.6	16.433	197.7	3.3736	197.3	18.568
198.4	3.3402	198	13.2298	199.1	7.5722	197.7	16.2041	197.8	3.4523	197.4	17.4403
198.5	3.4118	198.1	12.6827	199.2	7.1299	197.8	17.3712	197.9	3.5918	197.5	19.5253
198.6	4.0627	198.2	12.9712	199.3	7.9846	197.9	16.8645	198	3.3426	197.7	19.4347
198.8	3.3391	198.3	12.517	199.4	8.4925	198	17.9875	198.1	2.4915	197.7	20.2322
198.9	2.4557	198.4	13.0999	199.6	9.3174	198.2	18.0006	198.3	2.2805	197.9	20.9582
199	3.9375	198.6	12.2666	199.7	8.142	198.3	17.6132	198.4	3.0506	198	20.9594
199.1	2.7883	198.7	12.1617	199.8	9.1004	198.4	17.3938	198.5	3.4213	198.1	21.9524
199.2	3.3367	198.8	11.8017	199.9	8.9479	198.5	17.5357	198.6	2.7382	198.2	22.6343
199.3	2.2817	198.9	11.6217	200	8.3816	198.6	18.2772	198.7	3.022	198.3	22.285
199.4	2.9325	199	11.4489	200.1	8.9812	198.7	17.1888	198.8	2.1565	198.4	22.496
199.5	1.9479	199.2	11.7767	200.2	8.7857	198.9	16.7704	198.9	3.0553	198.6	21.5352
199.7	2.6941	199.3	11.3189	200.3	8.3232	199	17.8492	199.1	2.898	198.7	22.1598
199.8	1.7023	199.4	11.363	200.4	8.3816	199.1	17.6704	199.2	2.3592	198.8	20.8747
199.9	2.1517	199.5	11.2736	200.6	8.6844	199.2	17.4558	199.3	2.9707	198.9	20.1225
200	1.9574	199.6	11.0722	200.7	9.048	199.3	17.1173	199.4	2.9719	199	18.9066
200.1	2.9135	199.7	10.9661	200.8	8.8871	199.4	17.283	199.5	2.4664	199.1	19.2106
200.2	2.3174	199.8	11.0936	200.9	8.9669	199.5	17.91	199.6	3.2187	199.2	18.5657
200.3	3.1018	199.9	11.1234	201	8.7202	199.6	16.5498	199.7	3.109	199.4	18.9412
200.5	3.7134	200.1	11.1675	201.1	10.0255	199.8	17.1137	199.8	3.1769	199.5	19.2761
200.6	3.3784	200.2	10.7503	201.3	8.5604	199.9	17.0779	200	3.1471	199.6	18.3213
200.7	4.2677	200.3	11.6241	201.4	9.1088	200	16.5904	200.1	3.1972	199.7	17.7467
200.8	5.4729	200.4	11.6384	201.5	8.9252	200.1	15.9776	200.2	3.2353	199.8	18.6574
200.9	5.2881	200.5	11.5454	201.6	8.7941	200.2	15.6343	200.3	3.3796	199.9	19.5837
201	5.5492	200.6	12.0389	201.7	8.4913	200.3	16.0062	200.4	3.109	200	19.2773
201.2	5.9879	200.7	11.9305	201.8	7.9858	200.5	16.0348	200.5	3.5632	200.1	19.6421
201.3	6.268	200.9	11.6646	201.9	8.688	200.6	15.0192	200.6	2.7835	200.2	19.8054
201.4	5.6458	201	12.0795	202.1	7.5209	200.7	15.0883	200.8	3.2675	200.4	19.1736
201.5	6.2513	201.1	12.0056	202.2	7.1955	200.8	15.4161	200.9	2.948	200.5	18.8386
201.6	6.3312	201.2	12.0676	202.3	7.9548	200.9	15.1861	201	3.5119	200.6	19.2893
201.7	5.7733	201.3	12.4669	202.4	6.3479	201	16.2053	201.1	3.8385	200.7	18.5204
201.8	5.4109	201.4	12.3799	202.5	7.242	201.2	15.5044	201.2	3.0649	200.8	19.1009
202	5.5921	201.5	12.1474	202.7	6.6805	201.3	14.72	201.3	3.1579	200.9	18.3046
202.1	5.8854	201.6	12.3894	202.8	6.8152	201.4	14.5268	201.4	2.383	201	18.0781
202.2	6.9439	201.8	11.6587	202.9	7.6342	201.5	14.6425	201.6	3.2187	201.1	18.6849
202.3	5.6517	201.9	12.1272	203	6.808	201.6	15.9812	201.7	4.0329	201.3	18.5895
202.4	6.4886	202	11.8077	203.1	6.2263	201.7	15.6665	201.8	3.2699	201.4	18.2438
202.5	6.9356	202.1	11.6837	203.2	6.8676	201.8	14.6461	201.9	4.2629	201.5	18.5096
202.7	6.4874	202.2	11.6575	203.3	7.7546	202	15.676	202	3.9256	201.6	17.8111
202.8	7.7927	202.3	11.456	203.5	7.0393	202.1	15.2993	202.1	3.9494	201.7	17.7288
202.9	8.3697	202.4	11.9376	203.6	7.4947	202.2	15.7714	202.2	4.7433	201.8	17.6382
203	7.7391	202.6	10.8314	203.7	8.328	202.3	15.8942	202.3	4.6337	201.9	17.5822
203.1	8.3852	202.7	10.6096	203.8	8.7345	202.4	14.1037	202.4	4.9603	202.1	17.3748
203.2	8.657	202.8	9.8562	203.9	8.0323	202.5	15.0716	202.6	4.9126	202.1	17.041
203.3	7.0345	202.9	10.1674	204	8.9586	202.7	14.9095	202.7	5.0581	202.3	18.059
203.5	8.4233	203	10.519	204.2	8.111	202.8	14.8213	202.8	5.0819	202.4	17.0004
203.6	7.0608	203.1	10.0291	204.3	9.1815	202.9	12.9449	202.9	5.5003	202.5	19.3596
203.7	7.1085	203.3	10.1459	204.4	10.2079	203	14.1501	203	5.095	202.6	18.9376
203.8	8.105	203.4	9.5987	204.5	9.2089	203.1	14.2336	203.1	4.9007	202.7	19.4895
203.9	5.8091	203.5	9.7132	204.6	9.7227	203.2	14.2097	203.3	4.2164	202.8	20.1714
204	7.1561	203.6	9.7787	204.7	10.0529	203.3	14.6616	203.4	5.1427	203	19.6052
204.1	6.7878	203.7	10.2294	204.9	9.1779	203.4	15.893	203.5	4.3976	203.1	20.8282
204.2	6.2728	203.8	9.7418	205	9.2077	203.6	15.3363	203.6	4.3094	203.2	20.7722
204.4	5.9736	204	9.793	205.1	10.1805	203.7	16.4628	203.7	3.6848	203.3	20.8068
204.5	5.3465	204.1	10.0422	205.2	10.1304	203.8	16.9063	203.8	3.4773	203.4	22.0418
204.6	5.9748	204.2	10.6573	205.3	10.1554	203.9	17.2758	203.9	2.7931	203.5	21.5936
204.7	4.7588	204.3	10.823	205.4	10.1769	204	16.8371	204	3.6621	203.6	22.1264
204.8	5.1057	204.4	11.3022	205.6	9.861	204.1	16.5701	204.2	3.1233	203.7	22.819
204.9	5.7769	204.5	11.2438	205.7	9.9063	204.2	16.4819	204.3	3.742	203.9	22.6879
205	4.5717	204.6	11.785	205.8	9.6333	204.4	15.4686	204.4	3.3879	204	23.7966
205.1	5.1582	204.7	12.6648	205.9	9.0456	204.5	17.3354	204.5	4.4131	204.1	23.4914
205.3	5.6183	204.8	13.0844	206.1	8.3399	204.6	17.3724	204.6	4.0686	204.2	23.104
205.4	5.2929	205	13.4826	206.2	7.7903	204.7	18.0316	204.7	4.3178	204.3	23.4032
205.5	5.4729	205.1	13.6864	206.4	7.2801	204.8	16.4199	204.8	3.9434	204.4	22.0597
205.6	6.541	205.2	13.845	206.5	5.5277	204.9	18.8899	205	4.0722	204.5	23.191
205.8	6.0916	205.3	14.1668	206.6	6.4433	205	18.3439	205.1	4.3237	204.6	23.4163
205.9	6.0499	205.4	14.3468	206.7	4.5896	205.1	18.1365	205.2	3.7956	204.8	21.5089
206.1	5.3203	205.5	14.5173	206.8	5.4002	205.3	18.1317	205.3	3.823	204.9	20.895
206.2	5.8913	205.7	14.2002	206.9	5.5301	205.4	18.0244	205.4	3.2258	205	22.1658
206.3	5.6148	205.8	14.6854	207	4.7731	205.5	16.5451	205.5	3.1149	205.1	22.2921
206.4	6.1202	205.9	14.3135	207.2	6.5684	205.6	17.5428	205.6	2.6417	205.2	22.7904
206.5	5.0521	206.1	14.3361	207.3	5.1379	205.7	16.7477	205.8	2.2423	205.3	22.0144
206.6	5.6899	206.2	13.6793	207.4	6.1965	205.8	15.4936	205.9	2.0647	205.4	22.7857
206.8	5.6589	206.3	13.8319	207.5	6.9582	205.9	15.3077	206.1	1.7452	205.6	22.3255
206.9	4.7839	206.4	13.752	207.6	7.0286	206.2	13.8533	206.2	1.9181	205.7	22.2409
207	5.6565	206.5	13.0069	207.7	8.3697	206.3	14.8869	206.3	1.5068	205.8	22.7165
207.1	5.7662	206.7	13.1571	207.8	6.6006	206.4	14.3206	206.4	1.179	205.9	21.8058
207.2	6.8486	206.8	12.6517	207.9	6.8498	206.5	13.8664	206.5	2.1636	206.1	22.7976
207.3	6.8712	206.9	12.4168	208.1	7.5996	206.6	13.1917	206.6	2.172	206.2	21.9619
207.4	5.9879	207	12.1737	208.2	6.9988	206.7	13.0177	206.7	2.377	206.3	21.2073
207.6	6.2442	207.1	11.8756	208.3	7.0488	206.8	12.4645	206.9	2.2233	206.4	21.3683
207.7	6.5374	207.2	11.8947	208.4	6.9082	207	13.1977	207	2.2161	206.5	20.3013
207.8	6.336	207.3	11.8756	208.5	6.0105	207.1	13.5195	207.1	3.2437	206.7	21.1358
207.9	6.7079	207.5	12.008	208.6	6.0606	207.2	13.3455	207.2	2.3115	206.8	20.9034
208	7.7033	207.6	11.5168	208.8	5.796	207.3	12.567	207.3	3.6013	206.9	19.511
208.1	7.5817	207.7	11.9627	208.9	6.7723	207.4	13.7103	207.4	3.6049	207	21.0202
208.3	6.3431	207.8	11.4441	209	6.001	207.5	13.535	207.6	4.0114	207.1	19.6207
208.4	6.3801	207.9	11.9531	209.1	6.0296	207.6	13.0653	207.7	3.6597	207.2	20.597
208.5	6.5374	208	11.8971	209.2	6.3586	207.7	15.6474	207.8	4.4024	207.3	20.1488
208.6	5.6839	208.1	12.6314	209.3	6.7854	207.9	15.5044	207.9	4.189	207.4	20.4754
208.7	5.753	208.3	11.8589	209.5	7.2038	208	15.5664	208	3.897	207.6	20.6912
208.8	5.6469	208.4	12.5885	209.6	7.4446	208.1	16.5629	208.1	4.1723	207.7	20.4551
208.9	4.9961	208.5	12.2285	209.7	7.6103	208.2	15.5938	208.2	4.0245	207.8	20.4217
209	4.8327	208.6	12.2607	209.8	7.6902	208.3	15.6355	208.3	3.5739	207.9	20.6041
209.2	5.0569	208.7	11.4727	209.9	8.1825	208.4	15.7142	208.5	2.6059	208	20.8771
209.3	4.9567	208.8	12.0616	210	7.6854	208.5	15.1205	208.6	1.5366	208.1	21.0404
209.4	6.0081	208.9	11.3153	210.1	8.0788	208.7	14.9202	208.7	2.5499	208.2	19.5813
209.5	5.2202	209.1	11.5001	210.3	8.6045	208.8	14.1525	208.8	2.172	208.3	21.0393
209.6	6.8176	209.2	11.2486	210.4	8.1706	208.9	14.4148	208.9	3.3581	208.5	20.6304
209.7	5.9271	209.3	11.7469	210.5	8.2731	209	14.3993	209	2.5249	208.6	22.1384
209.8	6.7294	209.4	11.7826	210.6	8.5878	209.1	12.6672	209.1	3.1579	208.7	22.0084
210	6.7651	209.5	12.4443	210.7	8.4376	209.2	14.2252	209.2	3.2234	208.8	22.8596
210.1	7.2801	209.6	12.3131	210.8	7.8237	209.3	14.8058	209.4	3.1745	208.9	22.8071
210.2	6.4111	209.7	12.9128	210.9	8.359	209.5	14.7736	209.5	3.4952	209	22.6402
210.3	7.5769	209.9	12.3513	211.1	7.6377	209.6	15.7893	209.6	2.6107	209.1	23.7978
210.4	6.2895	210	12.8531	211.2	7.4184	209.7	15.3387	209.7	3.1817	209.2	24.3521
210.5	5.5337	210.1	12.3274	211.3	5.883	209.8	15.8405	209.8	3.2735	209.4	24.0052
210.6	5.573	210.2	12.6123	211.4	7.2944	209.9	15.2135	209.9	3.3414	209.5	24.879
210.7	5.3525	210.3	12.7387	211.5	6.0999	210	16.4378	210	3.2783	209.6	23.8693
210.9	5.3072	210.4	12.5122	211.6	5.5802	210.1	17.5369	210.1	3.1161	209.7	23.1969
211	4.7433	210.6	12.3036	211.7	5.6672	210.3	16.2375	210.3	2.9945	209.8	23.6475
211.1	4.487	210.7	12.4502	211.8	5.8711	210.4	16.8288	210.4	3.1185	209.9	22.8655
211.2	3.649	210.8	12.629	212	6.2788	210.5	16.1374	210.5	3.866	210	23.0289
211.3	4.3964	210.9	12.6934	212.1	6.9559	210.6	15.6271	210.6	3.6395	210.1	22.5723
211.4	4.2343	211	12.9271	212.2	6.6829	210.7	16.5284	210.7	3.5155	210.2	21.0464
211.5	4.3702	211.1	13.3741	212.3	7.4863	210.8	15.8596	210.8	3.8993	210.4	21.6651
211.6	4.9484	211.2	13.7889	212.4	7.987	210.9	15.887	210.9	3.3247	210.5	19.8412
211.7	4.1926	211.3	13.7866	212.6	7.0333	211.1	14.7927	211.1	3.2067	210.6	19.7053
211.8	4.7266	211.4	14.1013	212.7	7.2253	211.2	15.3184	211.2	2.6798	210.7	19.0997
211.9	5.1498	211.6	14.3814	212.8	7.7498	211.3	15.0788	211.3	2.5785	210.8	19.387
212.1	6.1202	211.7	14.6282	212.9	7.3183	211.4	15.1956	211.4	2.4998	210.9	19.7327
212.2	6.1536	211.8	14.4541	213	6.7139	211.5	15.2147	211.5	3.0994	211	18.9424
212.3	7.1025	211.9	14.168	213.1	6.7294	211.6	16.0432	211.6	2.9898	211.1	18.0316
212.4	6.1929	212	14.5555	213.2	5.9259	211.7	15.8322	211.8	3.6728	211.2	20.1738
212.5	6.9416	212.1	14.1072	213.3	6.8319	211.9	16.886	211.9	3.4738	211.4	20.02
212.7	6.8152	212.3	14.317	213.5	6.398	212	16.8896	212	3.6478	211.5	20.237
212.8	6.7699	212.4	14.0286	213.6	6.9749	212.1	17.0505	212.1	3.8004	211.6	21.3838
212.9	7.4112	212.5	13.6149	213.7	6.839	212.2	17.904	212.2	4.2915	211.7	21.1322
213	7.1967	212.6	13.8927	213.8	6.8629	212.3	18.8124	212.3	4.5967	211.8	20.5803
213.1	5.8115	212.7	14.0417	213.9	7.0596	212.4	18.214	212.4	4.7815	211.9	20.5863
213.2	6.9213	212.8	13.392	214	7.0393	212.6	17.8671	212.5	4.0519	212	21.1024
213.3	5.9032	212.9	13.7138	214.1	7.9966	212.7	17.6811	212.6	4.04	212.1	21.4481
213.5	5.8997	213.1	13.4265	214.2	7.2706	212.8	17.6895	212.7	3.4642	212.3	20.8426
213.6	5.7507	213.2	13.7806	214.4	7.3445	212.9	17.9541	212.9	3.3891	212.4	19.5062
213.7	5.4574	213.3	13.5207	214.5	6.1965	213	16.0038	213	2.8861	212.5	19.1641
213.8	5.7042	213.4	13.8259	214.6	6.5684	213.1	15.986	213.1	3.1233	212.6	19.0377
213.9	6.0105	213.5	13.3562	214.7	6.64	213.2	15.0347	213.2	2.054	212.7	19.1152
214	5.1057	213.6	13.4969	214.8	6.2799	213.3	15.3375	213.3	2.5487	212.8	20.0987
214.1	6.3789	213.7	13.4742	214.9	6.4659	213.5	14.6723	213.4	1.9586	212.9	18.8434
214.2	6.2072	213.9	14.0762	215	6.3574	213.6	14.4982	213.6	2.3365	213	19.7721
214.3	7.1728	214	14.0297	215.2	6.1023	213.7	14.7879	213.7	2.5809	213.2	19.3536
214.4	7.633	214.1	14.1656	215.3	6.187	213.8	15.1944	213.8	1.6797	213.3	19.9461
214.6	7.8487	214.2	14.4088	215.4	6.6566	213.9	14.5185	213.9	1.6403	213.4	20.2918
214.7	8.7523	214.3	13.9475	215.5	6.752	214	15.1753	214	2.2852	213.5	20.9785
214.8	7.3981	214.4	14.3635	215.6	6.8891	214.2	15.1801	214.1	2.0373	213.6	21.4517
214.9	7.9572	214.5	14.1299	215.7	5.846	214.3	15.2862	214.2	2.3198	213.7	21.9345
215	8.7214	214.6	13.926	215.8	5.6994	214.4	15.1205	214.3	2.4176	213.8	22.5866
215.1	6.9773	214.8	13.864	215.9	6.5136	214.5	14.6461	214.4	2.4354	214	22.8274
215.2	6.8605	214.9	13.032	216.2	4.7171	214.6	15.5532	214.5	2.4354	214.1	23.5999
215.4	6.5756	215	13.1047	216.3	4.8304	214.7	15.1503	214.7	2.0623	214.2	23.2577
215.5	5.8544	215.1	13.082	216.4	4.7553	214.9	14.2932	214.8	2.0552	214.3	24.2233
215.6	5.0092	215.2	13.2096	216.5	4.2295	215	14.8356	214.9	1.3971	214.4	25.0328
215.7	5.1522	215.3	12.8627	216.6	4.1986	215.1	14.8535	215	2.2948	214.5	24.4701
215.8	4.2403	215.4	13.2608	216.8	4.7314	215.2	15.5532	215.1	1.9991	214.6	24.4665
215.9	3.6168	215.6	12.7506	216.9	4.046	215.3	15.0561	215.2	1.6904	214.7	24.3473
216.1	2.7525	215.7	13.473	217	5.0282	215.4	14.9119	215.3	1.8644	214.8	23.5367
216.3	2.5165	215.8	13.4206	217.1	3.5119	215.5	16.2494	215.5	2.2268	215	23.5677
216.4	1.6749	215.9	13.2167	217.2	4.8006	215.6	16.8848	215.6	2.2185	215.1	23.1421
216.5	2.1541	216.1	12.964	217.3	4.6265	215.8	16.2542	215.7	2.4688	215.2	22.6414
216.6	1.3733	216.2	13.5875	217.4	4.6718	215.9	16.5725	215.8	2.5105	215.3	22.1288
216.7	0.6044	216.3	13.2954	217.5	3.7789	216.1	16.0623	215.9	2.3031	215.4	21.1489
216.8	1.6034	216.4	13.3586	217.7	4.5991	216.2	15.8215	216.1	2.8563	215.5	21.205
216.9	0.5448	216.5	13.5016	217.8	4.1389	216.3	16.8097	216.2	4.4072	215.6	21.6794
217	1.2112	216.7	14.0405	217.9	4.3535	216.4	15.9597	216.4	4.5455	215.8	19.7983
217.2	1.2898	216.8	13.4981	218	4.5431	216.5	16.2017	216.5	4.6861	215.9	21.4028
217.3	2.2292	216.9	13.8855	218.1	4.5931	216.6	16.3579	216.6	4.4012	216.1	21.6186
217.4	1.6451	217	13.5124	218.2	3.1888	216.7	15.5437	216.7	5.002	216.2	20.6184
217.5	2.6488	217.1	13.6435	218.4	4.2713	216.9	16.1958	216.8	5.1463	216.3	21.8797
217.6	2.7084	217.3	13.3181	218.5	4.5145	216.9	16.6833	216.9	5.7459	216.4	22.0239
217.7	4.4239	217.4	12.7268	218.6	4.0877	217.1	15.5842	217	5.7137	216.5	21.7617
217.9	3.8159	217.5	12.2476	218.7	4.4823	217.2	15.353	217.2	5.5611	216.6	23.346
218	4.245	217.6	12.6374	218.8	4.741	217.3	15.7583	217.3	4.909	216.7	22.7571
218.1	4.4119	217.7	12.5837	219	4.7982	217.4	13.876	217.4	4.5109	216.9	23.7787
218.2	5.2094	217.8	12.4621	219.1	4.9555	217.6	16.4473	217.5	5.3144	217	23.824
218.3	4.307	217.9	11.7874	219.2	5.4979	217.7	15.5962	217.6	5.2392	217.1	23.9944
218.4	4.9639	218	11.7922	219.3	4.9996	217.8	14.7069	217.7	4.6134	217.2	25.0828
218.5	5.399	218.2	11.7767	219.4	5.4646	217.9	15.0466	217.8	5.8746	217.3	25.1758
218.6	5.3692	218.3	12.095	219.5	5.424	218	14.2241	217.9	5.4431	217.4	24.6739
218.8	5.1141	218.4	11.8184	219.6	5.4741	218.1	12.5158	218.1	5.3513	217.5	25.1818
218.9	5.1558	218.5	11.7254	219.7	6.789	218.2	14.9393	218.2	5.9593	217.6	24.7467
219	5.4836	218.6	11.9531	219.9	5.9378	218.4	15.0454	218.3	5.6994	217.7	24.9505
219.1	4.729	218.7	12.4061	220	6.3562	218.5	13.6065	218.4	4.9627	217.8	24.8981
219.2	5.7828	218.8	12.157	220.1	6.4707	218.6	13.6936	218.5	5.2452	217.9	25.3236
219.3	5.3382	219	12.7673	220.2	6.6292	218.7	14.8034	218.6	5.2702	218.1	25.4107
219.4	5.2595	219.1	12.7888	220.3	6.2203	218.8	14.5054	218.7	4.8804	218.2	24.6859
219.5	5.7936	219.2	13.0212	220.4	6.8128	218.9	15.2111	218.8	5.4431	218.3	25.1532
219.7	6.2072	219.3	12.9235	220.5	6.3241	219.1	14.5018	219	4.698	218.4	24.7824
219.8	6.1047	219.4	13.3789	220.6	6.1738	219.2	13.5744	219.1	4.9126	218.5	25.4869
219.9	6.5088	219.5	12.3358	220.8	6.4027	219.3	14.9703	219.2	4.4632	218.6	25.1782
220	7.062	219.7	12.6982	220.9	4.8733	219.4	13.7293	219.3	4.4274	218.7	23.6046
220.1	6.64	219.8	12.6362	221	5.1522	219.5	13.783	219.4	4.2927	218.8	25.2593
220.2	6.7055	219.9	12.5325	221.1	4.456	219.6	13.6817	219.5	4.4727	219	24.6775
220.4	7.1752	220	12.6231	221.2	3.5393	219.8	12.2166	219.6	4.288	219.1	24.5214
220.5	6.9213	220.1	12.424	221.3	3.9315	219.9	15.2564	219.7	4.3249	219.2	25.239
220.6	7.0739	220.2	12.6028	221.5	3.5119	220	14.298	219.9	4.8077	219.3	24.8587
220.7	7.5531	220.3	12.6219	221.6	3.86	220.1	14.236	220	4.5121	219.4	24.0719
220.8	6.9773	220.5	12.8031	221.7	4.3404	220.2	14.956	220.1	4.0114	219.5	24.9505
220.9	6.8271	220.6	12.7649	221.8	3.9208	220.3	14.9691	220.2	3.9768	219.6	23.1838
221	6.7484	220.7	12.8436	221.9	4.0138	220.4	14.4923	220.3	4.8935	219.7	23.8013
221.2	6.5875	220.8	12.84	222	4.6754	220.5	15.918	220.4	4.5431	219.9	22.9919
221.3	6.8057	220.9	12.8913	222.2	4.6277	220.7	16.5308	220.6	3.7324	220	22.4638
221.4	6.8629	221	13.0558	222.3	5.7352	220.8	16.3555	220.7	3.7813	220.1	23.4854
221.5	6.5601	221.1	12.7947	222.4	5.883	220.9	14.7474	220.8	4.0114	220.2	22.9025
221.6	6.2931	221.2	13.1011	222.5	6.1226	221	16.5808	220.9	5.0056	220.3	23.3257
221.8	6.4659	221.4	13.2668	222.6	6.4743	221.1	16.346	221	4.8041	220.4	21.3492
221.9	6.5994	221.5	13.5756	222.7	6.5589	221.2	16.1278	221.1	5.1296	220.5	22.3601
222	6.8963	221.6	13.2489	222.8	6.2478	221.3	16.7537	221.2	6.063	220.7	22.9728
222.1	5.9485	221.7	13.2358	223	6.5398	221.5	16.3913	221.3	6.119	220.8	22.6903
222.2	6.2954	221.8	13.6125	223.1	6.4313	221.6	15.6593	221.5	6.2609	220.9	23.5093
222.3	6.3086	221.9	13.814	223.2	7.4553	221.7	17.1161	221.6	5.4991	221	22.1157
222.4	6.4826	222	14.0154	223.3	6.6257	221.8	15.9526	221.7	6.5947	221.1	23.1409
222.6	6.4814	222.2	13.7448	223.4	7.0572	221.9	16.9897	221.8	6.7592	221.2	22.8524
222.7	6.2454	222.3	14.0858	223.6	7.3659	222.1	15.7261	221.9	7.1383	221.3	22.4304
222.8	5.1522	222.4	13.7365	223.7	7.5877	222.2	16.4449	222	6.7222	221.5	23.9313
222.9	6.6257	222.5	14.1943	223.8	6.7496	222.3	16.6714	222.2	6.9523	221.6	22.5425
223	6.6864	222.6	13.6721	223.9	7.0071	222.4	14.925	222.2	7.1371	221.6	23.2482
223.1	5.7006	222.7	13.6328	224	6.938	222.5	16.1827	222.4	7.0405	221.8	23.6523
223.2	6.4826	222.8	14.0131	224.1	7.0894	222.6	16.2935	222.5	6.8367	221.9	24.085
223.3	5.6851	223	13.6471	224.2	7.1383	222.8	15.4471	222.6	6.5124	222	23.5808
223.5	6.6292	223.1	14.2801	224.3	7.2372	222.9	17.2114	222.7	6.5637	222.1	23.1779
223.6	6.4206	223.2	14.3659	224.5	8.0609	223	15.9752	222.8	6.3753	222.2	23.5367
223.7	5.7852	223.3	14.2705	224.6	8.1968	223.1	15.713	222.9	6.2549	222.3	23.5891
223.8	5.2702	223.4	14.565	224.7	8.2719	223.2	16.2601	223.1	6.0391	222.4	22.3494
223.9	5.1796	223.5	14.8273	224.8	8.5127	223.3	15.08	223.2	6.0308	222.6	22.4423
224	5.393	223.6	15.0359	224.9	8.8334	223.4	15.6236	223.3	6.2048	222.7	21.7104
224.1	5.0211	223.8	14.9894	225	9.5749	223.5	15.7523	223.4	5.8353	222.8	21.1823
224.2	5.461	223.9	15.2183	225.1	9.532	223.7	14.5412	223.5	6.5696	222.9	21.3432
224.4	4.4501	224	14.8785	225.2	8.6629	223.8	16.8955	223.6	6.3527	223	21.4171
224.5	4.5204	224.1	14.4541	225.4	9.6035	223.9	15.8036	223.7	5.97	223.1	21.5435
224.6	4.8673	224.2	14.7831	225.5	8.9979	224	17.1387	223.9	6.5994	223.2	21.9476
224.7	5.4538	224.3	14.3635	225.6	8.7261	224.1	17.2782	224	6.4945	223.4	21.2801
224.8	4.5407	224.4	14.3969	225.7	9.4271	224.2	16.5284	224.1	6.6543	223.5	21.3349
224.9	4.6885	224.5	14.4196	225.8	7.3195	224.3	15.8799	224.2	6.4945	223.6	21.7032
225.1	4.1211	224.7	14.2324	225.9	7.4494	224.5	17.1721	224.3	5.8949	223.7	20.5767
225.2	4.3201	224.8	14.2527	226	6.5899	224.6	16.7835	224.4	6.4707	223.8	21.9142
225.3	3.9315	224.9	13.7758	226.2	7.0083	224.7	17.0445	224.5	6.0511	223.9	21.0261
225.4	4.1783	225	13.7079	226.3	6.125	224.8	16.0098	224.6	5.5456	224	21.1155
225.5	3.6895	225.1	14.0786	226.4	5.8055	224.9	16.0134	224.7	5.5885	224.1	21.6603
225.6	4.4632	225.2	14.0512	226.5	5.8067	225	15.4531	224.9	5.3799	224.3	20.9463
225.8	4.2462	225.4	14.0941	226.6	5.6517	225.1	16.1016	225	4.884	224.4	20.4492
225.9	4.0162	225.5	13.7043	226.7	5.3108	225.3	14.0584	225.1	4.766	224.5	20.4241
226	4.6825	225.6	13.7877	226.9	5.517	225.4	15.7177	225.2	4.8125	224.6	21.5375
226.1	4.7004	225.7	14.1418	227	6.144	225.5	15.1837	225.3	5.5659	224.7	20.3192
226.2	4.6611	225.8	13.9272	227.1	5.877	225.6	13.2477	225.4	5.765	224.8	20.2513
226.3	4.9973	225.9	13.9105	227.2	6.1178	225.7	15.7797	225.5	6.1488	224.9	20.9928
226.4	5.6493	226	13.8557	227.3	6.3026	225.8	15.9991	225.6	5.7769	225	20.0737
226.5	5.8877	226.2	13.7222	227.4	6.3407	225.9	14.7808	225.8	6.8188	225.2	20.2835
226.7	6.0511	226.3	13.0069	227.5	6.6161	226.1	17.5035	225.9	7.1263	225.3	20.2167
226.8	6.5506	226.4	13.5386	227.6	6.8021	226.2	16.3007	226	7.7832	225.4	20.0605
226.9	6.7604	226.5	14.1573	227.8	7.0286	226.3	16.5665	226.1	5.5909	225.5	19.8817
227	6.8295	226.6	12.8853	227.9	6.9451	226.4	17.0553	226.2	7.7701	225.6	19.908
227.1	7.7534	226.7	13.5732	228	7.0167	226.5	16.4378	226.3	8.5604	225.7	20.2847
227.2	8.4341	226.8	13.3002	228.1	7.4148	226.6	17.4069	226.4	8.0347	225.9	21.1334
227.4	7.6783	226.9	14.1335	228.2	6.9237	226.7	16.9158	226.6	7.4387	226	21.1203
227.5	7.8046	227	13.0224	228.3	7.0798	226.9	16.6869	226.7	7.7271	226.1	22.1002
227.6	8.6129	227.2	12.5432	228.4	6.7973	227	17.2067	226.8	7.0798	226.2	22.2147
227.7	8.0633	227.3	12.5682	228.6	6.4504	227.1	17.3092	226.9	6.8581	226.3	22.0788
227.8	8.1229	227.4	13.6673	228.7	7.0238	227.2	17.4105	227	6.845	226.4	23.0181
227.9	8.3625	227.5	11.8661	228.8	6.6412	227.3	16.4068	227.1	5.585	226.5	22.9096
228	8.4138	227.6	12.9211	228.9	7.1168	227.4	15.8596	227.2	6.1524	226.6	23.582
228.1	7.6818	227.7	12.3143	229	7.3028	227.5	14.9894	227.3	5.7054	226.7	24.2519
228.3	8.0788	227.9	12.7363	229.1	6.7019	227.7	15.204	227.5	4.0126	226.8	22.5067
228.4	8.1158	228	13.0069	229.2	6.5374	227.8	14.7927	227.6	5.3084	227	24.786
228.5	7.8905	228.1	12.8448	229.3	6.6257	227.9	14.1203	227.7	4.6396	227.1	23.315
228.6	8.0657	228.2	13.1023	229.5	7.1275	228	13.6042	227.8	4.9293	227.2	24.2829
228.7	8.0061	228.3	13.4063	229.6	6.6102	228.1	14.6556	227.9	5.1665	227.3	24.0493
228.8	8.2004	228.4	12.7971	229.7	6.5064	228.2	14.5614	228	5.4502	227.4	23.1779
229	7.993	228.5	13.8176	229.8	6.7425	228.3	15.3303	228.1	5.6827	227.5	24.4248
229.1	8.3566	228.7	14.0131	229.9	6.839	228.5	15.8274	228.3	6.3515	227.6	24.1137
229.2	9.3138	228.8	13.9368	230	6.6662	228.6	16.0992	228.4	7.4148	227.8	23.5415
229.3	8.0264	228.9	14.7796	230.1	6.7115	228.7	16.1493	228.5	7.0584	227.9	24.06
229.4	8.4805	229	14.3695	230.3	7.2193	228.8	16.6667	228.6	7.0441	228	23.7525
229.5	9.1004	229.1	14.5316	230.4	7.5305	228.9	15.1181	228.7	7.8392	228.1	24.246
229.6	8.7237	229.2	15.676	230.5	6.9964	229	17.8123	228.8	7.8881	228.2	24.2353
229.7	8.5616	229.3	14.5626	230.6	7.0643	229.2	16.9277	228.9	5.7507	228.3	24.122
229.9	8.7988	229.5	15.0621	230.7	7.3469	229.3	16.2029	229.1	6.4325	228.4	24.8182
230	9.1159	229.6	14.7319	230.8	7.6091	229.4	16.3281	229.2	6.7651	228.6	24.1613
230.1	8.5771	229.7	14.1799	231	7.4589	229.5	15.4531	229.3	6.4445	228.7	24.4319
230.2	8.3482	229.8	15.0466	231.1	7.0465	229.6	15.5056	229.4	6.3145	228.8	24.0779
230.3	7.4005	229.9	13.5863	231.2	7.23	229.7	16.1827	229.5	5.8925	228.9	23.3591
230.4	8.0407	230	13.6209	231.3	7.4101	229.8	13.4766	229.6	5.9414	229	24.7788
230.5	7.8857	230.2	13.386	231.4	7.6556	229.9	15.1742	229.7	5.3346	229.1	24.1029
230.7	7.3707	230.2	13.1786	231.5	6.6435	230	14.7808	229.9	5.486	229.2	24.9827
230.7	6.8557	230.3	13.5195	231.6	6.9952	230.2	14.6365	230	5.9271	229.3	24.4892
230.9	7.3791	230.5	12.4562	231.8	6.6376	230.3	17.2722	230.1	5.7173	229.5	23.5701
231	7.9882	230.6	12.5241	231.9	6.4135	230.4	17.1161	230.2	5.548	229.6	23.7036
231.1	7.4923	230.7	13.6268	232	6.0797	230.5	16.9981	230.3	5.4073	229.7	23.1576
231.2	7.3051	230.8	13.7615	232.1	5.4669	230.6	16.1493	230.4	5.5599	229.8	23.7143
231.3	7.7069	230.9	14.261	232.2	6.6173	230.8	18.1448	230.5	6.4456	229.9	23.3018
231.4	6.7091	231.1	14.4899	232.3	4.9341	230.9	19.1855	230.6	5.7983	230	22.4268
231.6	7.1275	231.2	13.9236	232.4	5.6505	231	19.3465	230.7	6.8903	230.1	21.9238
231.7	7.0477	231.3	14.3695	232.6	6.2358	231.1	18.8804	230.9	6.8212	230.2	22.3172
231.8	7.05	231.4	14.2837	232.6	6.5899	231.2	17.4618	231	7.273	230.4	22.2302
231.9	6.9261	231.5	14.1013	232.8	6.6459	231.3	18.9447	231.1	7.5185	230.5	21.4446
232	7.5901	231.6	14.1931	232.9	6.3157	231.4	18.363	231.2	7.143	230.6	21.2348
232.1	7.1704	231.7	13.8342	233	6.5529	231.5	18.4476	231.3	7.3993	230.7	20.6375
232.2	7.6532	231.8	13.622	233.1	7.7081	231.6	18.5692	231.4	6.9869	230.8	20.6268
232.4	7.5483	232	13.8438	233.2	7.3004	231.8	17.7729	231.5	6.8021	230.9	20.8581
232.5	8.0991	232.1	13.1893	233.3	7.8964	231.9	16.9277	231.6	5.8389	231	20.895
232.6	8.6558	232.2	13.9475	233.5	6.6805	232	18.4023	231.7	6.9141	231.1	20.6935
232.7	7.7033	232.3	13.4909	233.6	6.3372	232.1	18.034	231.9	6.6423	231.2	20.9653
232.8	7.0703	232.4	13.9916	233.7	6.516	232.2	19.635	232	6.3396	231.4	21.2109
232.9	8.0585	232.5	14.1263	233.8	6.2978	232.3	18.2831	232.1	6.8104	231.5	21.3039
233	7.4089	232.6	13.8044	233.9	6.5327	232.5	17.0863	232.2	6.0701	231.6	22.0275
233.1	7.925	232.8	13.8795	234	5.9545	232.6	19.9807	232.3	5.9032	231.7	21.6889
233.3	7.683	232.9	14.1287	234.2	5.43	232.7	19.5301	232.4	6.1035	231.8	22.1694
233.4	7.4005	233	13.4003	234.3	5.5945	232.8	17.978	232.6	5.3883	231.9	22.2921
233.5	7.8607	233.1	13.7782	234.4	5.548	232.9	19.8627	232.7	5.6851	232	22.4209
233.6	7.3934	233.2	14.4041	234.5	5.883	233	18.8577	232.8	5.2834	232.2	22.372
233.7	7.5591	233.3	14.6651	234.6	5.7721	233.1	20.1154	232.9	5.2106	232.3	22.6617
233.8	8.08	233.5	17.4487	234.7	5.9915	233.2	20.5016	233	3.2604	232.4	22.006
233.9	7.0989	233.6	13.6876	234.8	6.4731	233.4	19.9485	233.1	4.6468	232.5	22.7308
234	7.7724	233.7	14.4494	235	5.3096	233.5	20.1011	233.2	4.7863	232.6	21.8725
234.2	7.7724	233.8	15.0514	235.1	6.2549	233.6	19.2451	233.4	4.6527	232.7	21.4839
234.3	7.391	233.9	14.8261	235.2	6.9535	233.7	19.0794	233.5	4.766	232.8	22.3243
234.4	7.6222	234	14.931	235.3	6.5804	233.8	18.723	233.6	5.1796	232.9	20.957
234.5	7.6127	234.1	13.9952	235.4	6.4182	233.9	17.4487	233.7	4.1056	233	22.0788
234.6	7.4291	234.3	14.5912	235.5	5.939	234	16.7906	233.8	5.1999	233.2	22.0084
234.7	8.1193	234.4	13.3467	235.7	6.3705	234.2	15.9705	233.9	5.4502	233.3	21.8916
234.8	8.5413	234.5	12.7375	235.8	7.0608	234.3	16.0921	234	4.4262	233.4	22.5842
235	7.5781	234.6	13.1094	235.9	6.4564	234.4	15.7785	234.1	4.8971	233.5	22.738
235.1	7.6604	234.7	12.3703	236	7.236	234.5	14.3445	234.3	4.8459	233.6	22.1217
235.2	8.6629	234.8	12.5635	236.1	7.447	234.6	14.3766	234.4	4.6587	233.7	23.3483
235.3	7.7474	234.9	12.9104	236.1	6.3849	234.7	14.3826	234.5	4.245	233.8	23.6321
235.4	7.8809	235.1	12.9306	236.2	6.9201	234.8	12.9271	234.6	2.5892	233.9	24.4093
235.5	8.4674	235.2	13.9248	236.4	7.1085	235	14.7772	234.7	4.1068	234.1	23.886
235.6	8.2886	235.3	14.286	236.5	6.9654	235.1	13.7985	234.8	4.5276	234.2	23.4342
235.7	8.2564	235.4	14.7688	236.6	7.7415	235.2	14.3886	234.9	4.2701	234.3	24.724
235.9	7.6795	235.5	15.5139	236.7	7.8416	235.3	14.4315	235	4.133	234.4	24.7836
236	7.7605	235.6	15.645	236.8	7.7033	235.4	14.4923	235.2	4.5359	234.5	24.2627
236.1	7.956	235.7	16.0635	236.9	7.9942	235.5	14.8869	235.3	5.4383	234.6	24.5202
236.1	6.6006	235.9	15.5675	237	7.087	235.7	14.2431	235.4	4.9675	234.8	23.4032
236.2	8.1944	236	15.7583	237.1	7.72	235.8	14.9667	235.5	4.8339	234.9	22.9275
236.3	6.7365	236.1	15.8966	237.3	8.6117	235.9	14.6508	235.6	5.3489	235	23.3066
236.4	6.9249	236.1	14.6174	237.4	8.2719	236	14.0405	235.7	5.3871	235.1	22.3136
236.6	6.8033	236.2	15.6128	237.5	8.0597	236.1	14.9381	235.8	5.0676	235.2	22.2731
236.7	6.2907	236.3	15.1062	237.6	8.0466	236.1	14.7474	236	5.3024	235.3	21.9023
236.8	6.5172	236.4	14.6902	237.7	8.6391	236.2	14.3564	236.1	5.039	235.5	21.7569
236.9	6.8665	236.6	14.8129	237.8	8.3995	236.4	14.776	236.1	5.8675	235.6	21.5948
237	6.5386	236.7	14.7402	238	7.4208	236.5	14.9679	236.2	5.43	235.7	22.0406
237.1	7.3814	236.8	13.7758	238.1	7.5674	236.6	14.5888	236.3	5.9891	235.8	21.1406
237.3	7.4005	236.9	13.8736	238.2	6.9118	236.7	14.658	236.4	5.4228	235.9	22.0919
237.4	7.3385	237	13.622	238.3	6.0606	236.8	14.3826	236.5	5.7948	236	22.1598
237.5	8.0407	237.1	13.7746	238.4	6.5804	236.9	14.8702	236.6	5.5993	236.1	23.1659
237.6	8.4472	237.3	13.6888	238.6	5.7888	237	15.0549	236.8	5.461	236.1	23.0026
237.7	7.8583	237.4	13.7711	238.7	6.2585	237.1	15.4698	236.9	5.4061	236.2	24.1029
237.8	8.8489	237.5	14.0452	238.8	6.2418	237.3	15.384	237	5.8961	236.4	24.1339
238	8.8549	237.6	14.2205	238.9	6.3419	237.4	15.4924	237.1	5.3108	236.5	23.1314
238	8.8942	237.7	14.919	239	6.243	237.5	15.6891	237.2	5.2333	236.6	24.147
238.2	8.0669	237.8	16.0205	239.1	6.6674	237.6	14.9524	237.3	6.0225	236.7	24.7335
238.3	9.234	238	16.0384	239.2	7.8297	237.7	17.693	237.4	4.6194	236.8	22.5472
238.4	8.5461	238.1	16.9539	239.4	7.7105	237.8	17.1888	237.5	5.0509	236.9	24.426
238.5	8.508	238.2	16.7322	239.5	6.8414	238	17.6263	237.7	4.9794	237	23.6774
238.6	8.1837	238.3	17.0779	239.6	7.7069	238.1	17.5309	237.8	4.2748	237.1	23.4008
238.7	8.2111	238.4	17.2281	239.7	6.8915	238.2	17.7395	237.9	4.8268	237.2	23.2542
238.8	8.0562	238.5	16.7835	239.8	8.6784	238.3	17.6883	238	4.1199	237.3	22.3053
239	8.2111	238.6	17.4093	239.9	6.9308	238.4	20.6447	238.1	4.7004	237.5	22.2826
239.1	7.8106	238.7	17.0052	240	7.1692	238.5	19.7125	238.2	4.2033	237.6	21.9405
239.2	8.0729	238.9	16.1064	240.2	7.472	238.6	20.5874	238.3	3.5405	237.7	20.5922
239.3	7.4601	239	15.9407	240.3	6.1202	238.8	19.9676	238.5	3.6383	237.8	21.3301
239.4	7.031	239.1	15.7774	240.4	6.4003	238.9	21.075	238.6	4.5574	237.9	19.5205
239.5	7.2193	239.2	15.5234	240.5	5.9271	239	21.7617	238.7	3.7801	238	21.224
239.6	7.1728	239.3	15.5675	240.6	5.0437	239.1	20.6268	238.8	4.3011	238.1	20.4754
239.7	7.1943	239.4	16.011	240.7	5.7268	239.2	23.3758	238.9	4.5645	238.3	20.5767
239.8	7.5042	239.5	15.0263	240.8	5.5957	239.3	21.7545	239	5.2309	238.4	21.4231
240	6.3479	239.7	15.2051	240.9	5.8544	239.4	21.9595	239.1	5.2047	238.5	21.0142
240.1	6.4468	239.8	15.0752	241	5.7781	239.5	22.1968	239.2	6.0582	238.6	21.4458
240.2	6.6936	239.9	15.0931	241.2	5.8877	239.7	21.832	239.4	6.4623	238.7	21.0404
240.3	6.8545	240	15.1742	241.3	5.672	239.8	20.3061	239.5	6.6304	238.8	21.9607
240.5	6.0856	240.1	14.5006	241.4	6.0713	239.9	22.3875	239.6	5.9164	238.9	23.2565
240.6	6.1965	240.2	14.6246	241.5	5.6183	240	22.0025	239.7	5.9819	239	23.557
240.7	6.1643	240.4	14.3909	241.6	5.8329	240.1	21.8523	239.8	6.3562	239.2	23.3841
240.8	6.1953	240.5	14.23	241.7	5.9879	240.2	20.2441	239.9	6.386	239.3	24.2209
240.9	6.7973	240.6	14.59	241.8	5.7638	240.3	20.4361	240	5.461	239.4	24.0862
241	6.119	240.7	14.4124	242	6.2191	240.4	20.4301	240.2	5.5265	239.5	25.8064
241.1	7.0965	240.8	14.3206	242.1	6.4397	240.6	20.0534	240.3	5.4121	239.6	25.8243
241.2	6.5374	240.9	14.2634	242.2	5.9068	240.7	19.6373	240.4	5.1904	239.7	25.9793
241.4	6.4099	241	14.4172	242.3	6.5076	240.8	18.6873	240.5	5.5265	239.8	26.6743
241.5	6.7353	241.1	13.8927	242.4	5.362	240.9	18.127	240.6	5.4419	239.9	26.3631
241.6	6.6745	241.2	14.0369	242.5	5.8305	241	18.276	240.7	5.1045	240.1	26.2928
241.7	7.1347	241.4	13.8557	242.7	5.573	241.1	18.0793	240.8	5.7888	240.2	27.3192
241.8	7.3075	241.5	13.7711	242.8	5.089	241.2	18.3857	241	5.2381	240.3	26.0544
241.9	7.5245	241.6	13.5064	242.9	5.6458	241.4	17.4165	241.1	4.9722	240.4	27.8533
242	7.7367	241.7	13.6578	243	5.0998	241.5	17.4618	241.2	5.4657	240.5	28.0035
242.2	8.2684	241.8	13.5028	243.1	5.4419	241.6	16.7489	241.3	4.8125	240.6	27.7185
242.3	7.4899	241.9	13.2442	243.3	5.4502	241.7	17.6287	241.4	5.1856	240.7	28.1215
242.4	7.7391	242	13.5624	243.4	6.4635	241.8	16.5975	241.5	5.2881	240.8	27.4968
242.5	8.1933	242.2	13.8867	243.5	6.3884	241.9	16.8121	241.6	5.5516	241	28.0273
242.6	7.304	242.3	13.7353	243.6	6.3431	242	15.6701	241.7	6.1524	241.1	28.5828
242.7	7.0369	242.4	14.2348	243.7	7.6532	242.2	16.3019	241.9	5.9545	241.2	27.8878
242.8	6.1393	242.5	13.9725	243.8	7.3457	242.3	13.8867	242	6.1679	241.3	28.2121
243	6.7759	242.6	13.8176	244	7.6973	242.4	16.3806	242.1	6.4826	241.4	28.6841
243.1	5.2667	242.8	13.7067	244	8.3601	242.5	15.4793	242.2	6.9118	241.5	28.2598
243.2	5.2071	242.9	13.9248	244.2	7.1144	242.6	15.4793	242.3	7.0679	241.6	28.6233
243.3	4.6909	243	14.0953	244.3	7.8011	242.7	15.7952	242.4	7.0345	241.7	29.1979
243.4	3.9184	243.1	14.9286	244.4	8.5092	242.8	15.3613	242.6	6.7115	241.8	28.1727
243.5	3.8302	243.2	14.1668	244.5	7.7558	243	15.4376	242.7	6.7055	241.9	25.9769
243.6	3.7932	243.3	14.3814	244.6	8.7082	243.1	15.5878	242.8	6.9916	242.1	27.1034
243.7	4.1425	243.4	14.1943	244.7	8.111	243.2	16.2113	242.9	6.9213	242.2	26.4502
243.8	2.3091	243.6	14.4756	244.8	8.5139	243.3	15.856	243	6.3074	242.3	26.8304
244	2.836	243.7	14.534	245	8.5914	243.4	15.3649	243.1	6.181	242.4	23.8538
244.1	2.8098	243.8	14.2896	245.1	9.073	243.5	16.0897	243.2	5.933	242.5	25.0542
244.2	2.6667	243.9	14.6449	245.2	8.8227	243.6	15.1765	243.3	5.8198	242.6	23.973
244.3	2.9957	244	14.0643	245.3	9.4283	243.8	16.7847	243.4	5.4252	242.7	23.2947
244.4	2.3949	244.1	13.6578	245.4	9.0694	243.9	16.3651	243.5	5.1773	242.9	22.8679
244.5	2.1207	244.3	14.0691	245.5	9.3925	244	17.2353	243.7	5.331	243	22.0883
244.7	2.2233	244.4	14.3456	245.6	9.1779	244.1	17.0064	243.8	4.9055	243.1	21.0226
244.8	2.9039	244.5	14.6627	245.7	9.625	244.2	18.0554	243.9	5.8973	243.2	20.8616
244.9	3.1424	244.6	14.8582	245.8	9.3186	244.3	18.9316	244	3.5203	243.3	20.4933
245	2.6691	244.7	14.8571	246	9.9242	244.4	18.3284	244.1	5.1999	243.4	19.9544
245.1	3.7014	244.8	15.0716	246.1	9.0468	244.6	19.9115	244.2	5.6612	243.5	19.8388
245.2	2.9933	244.9	15.2218	246.2	8.1289	244.7	19.3131	244.3	5.3382	243.6	20.417
245.3	3.7563	245	14.745	246.3	8.3601	244.8	19.4788	244.5	5.8162	243.7	19.896
245.4	3.5608	245.1	15.1896	246.4	8.3566	244.9	20.6983	244.6	5.4133	243.8	20.5994
245.6	3.2735	245.2	14.4529	246.5	7.6842	245	19.6648	244.7	6.5148	244	20.3848
245.7	4.0376	245.4	14.5233	246.6	7.0119	245.1	19.449	244.8	6.1572	244.1	20.138
245.8	4.1461	245.5	14.3361	246.8	6.2096	245.2	20.2	244.9	6.2454	244.2	21.2812
245.9	4.3416	245.6	14.3802	246.9	6.3276	245.3	19.784	245	6.2704	244.3	21.4767
246	4.8625	245.7	14.2825	247	5.9986	245.4	17.7181	245.1	6.8092	244.4	21.6794
246.1	4.9865	245.8	14.4374	247.1	6.3157	245.6	19.0449	245.2	6.0117	244.5	22.5425
246.3	5.4312	245.9	14.6759	247.2	5.0724	245.7	19.1236	245.4	6.0117	244.6	22.1849
246.4	4.4751	246.1	14.5483	247.3	5.2655	245.8	18.1329	245.5	5.7125	244.7	23.1683
246.5	5.0414	246.2	13.535	247.4	5.2822	245.9	17.1471	245.6	5.7781	244.9	22.6152
246.6	5.6934	246.3	14.7188	247.6	5.6958	246	19.5527	245.7	4.7302	245	22.4781
246.7	5.6815	246.4	14.621	247.7	5.511	246.1	18.7004	245.8	5.2869	245.1	22.2933
246.8	5.2238	246.5	14.6151	247.8	5.7113	246.2	19.7041	245.9	4.7481	245.2	23.7739
246.9	5.4777	246.6	14.5423	247.9	5.7924	246.4	19.1009	246	4.5013	245.3	23.5856
247.1	5.4336	246.7	14.6008	248	6.4945	246.5	19.1379	246.2	3.9101	245.4	23.0598
247.2	6.3467	246.8	13.8199	248.2	6.8414	246.6	19.9389	246.3	4.673	245.5	22.7964
247.3	6.3825	246.9	13.9976	248.3	6.7246	246.7	19.66	246.4	3.8052	245.6	23.5546
247.4	6.4111	247.1	13.7174	248.4	7.1538	246.8	20.2513	246.5	5.1355	245.7	23.4401
247.5	6.9129	247.2	13.9284	248.5	7.3385	246.9	19.6743	246.6	5.2297	245.8	22.7642
247.6	6.5327	247.3	13.9558	248.6	7.2372	247.1	20.5493	246.8	5.1045	246	23.3889
247.7	6.8688	247.4	13.2382	248.7	7.7856	247.1	18.9745	246.9	5.8341	246.1	23.8907
247.8	6.9058	247.5	12.8007	248.8	8.9347	247.3	20.0939	247	6.3694	246.2	23.2041
248	6.5994	247.6	13.5732	248.9	7.7558	247.4	19.6922	247.1	6.6817	246.3	24.1268
248.1	7.6461	247.8	13.1476	249.1	7.7868	247.5	19.7649	247.2	7.2896	246.4	23.7143
248.2	5.97	247.9	13.7317	249.2	7.8738	247.6	18.6014	247.3	7.3552	246.5	24.2913
248.3	6.2835	248	13.6876	249.3	7.8237	247.7	19.0544	247.4	7.509	246.6	24.6763
248.4	5.4419	248.1	13.864	249.4	8.2421	247.9	18.9853	247.5	7.9703	246.7	25.1043
248.5	5.883	248.2	13.8652	249.5	8.0919	248	17.8123	247.6	7.0441	246.8	25.9388
248.7	6.3217	248.3	14.0965	249.6	8.626	248.1	18.2867	247.8	7.2074	247	26.2606
248.7	6.2907	248.5	14.5733	249.7	8.0574	248.2	18.1532	247.9	6.8712	247.1	25.7242
248.9	6.0809	248.6	14.7367	249.9	8.8203	248.3	16.9933	248	6.7163	247.2	26.4931
249	6.0999	248.7	14.8165	250	8.7106	248.4	17.3366	248.1	6.3992	247.3	24.929
249.1	6.2108	248.8	14.7903	250.1	9.4652	248.5	17.5452	248.2	5.5647	247.4	25.1043
249.2	6.2096	248.9	14.8535	250.2	9.563	248.6	17.7836	248.3	5.8651	247.5	25.8362
249.3	6.659	249	15.4471	250.3	10.2115	248.7	17.0863	248.4	5.07	247.6	24.7669
249.5	6.9678	249.1	15.1789	250.4	9.4545	248.9	18.1603	248.6	5.4634	247.7	24.8289
249.6	6.8665	249.3	15.3327	250.5	9.4593	249	17.8826	248.7	5.3835	247.8	25.6145
249.7	6.6638	249.4	14.8749	250.7	9.7966	249.1	17.3152	248.8	5.312	248	24.5404
249.8	6.969	249.5	15.0716	250.8	9.5987	249.2	16.7477	248.9	5.2369	248.1	25.7051
249.9	6.6793	249.6	14.8213	250.9	8.8441	249.3	17.7443	249	4.8363	248.2	25.9435
250	6.9594	249.7	14.9775	251	8.5986	249.4	17.2305	249.1	4.7147	248.3	25.9602
250.1	6.4719	249.8	14.6806	251.1	8.446	249.6	17.4904	249.3	5.9128	248.4	26.7434
250.2	6.5506	249.9	14.8928	251.2	7.9608	249.7	17.7515	249.4	6.3276	248.5	26.2284
250.4	6.0928	250	15.08	251.3	8.1599	249.8	17.4904	249.5	6.243	248.6	27.2179
250.5	5.8818	250.1	14.8451	251.5	7.0488	249.9	17.5881	249.6	5.8162	248.7	26.9222
250.6	5.1451	250.3	14.9333	251.6	7.1871	250	17.3056	249.7	6.2203	248.9	27.0045
250.7	5.3096	250.4	15.552	251.7	8.1337	250.1	17.7884	249.8	6.4957	249	27.2417
250.8	5.2464	250.5	15.403	251.8	7.8297	250.2	17.8289	249.9	6.4158	249.1	25.655
250.9	4.58	250.6	16.4425	251.9	8.7821	250.3	16.9575	250	5.9807	249.2	26.2177
251	5.2679	250.7	16.0778	252	7.7796	250.5	17.4344	250.1	6.1464	249.3	25.6395
251.2	4.7731	250.8	15.769	252.1	9.0015	250.6	18.1901	250.3	4.8912	249.4	24.3831
251.3	5.0068	251	16.0944	252.2	8.0228	250.7	17.3163	250.4	5.12	249.5	24.6811
251.4	5.4801	251.1	15.6307	252.4	9.4962	250.8	18.9734	250.5	5.2476	249.6	24.5905
251.5	5.2392	251.2	15.7774	252.4	9.0992	250.9	18.2283	250.6	5.3048	249.8	23.4091
251.6	5.4371	251.3	14.9262	252.6	9.2006	251	19.0187	250.7	5.8472	249.9	23.4342
251.7	6.0809	251.4	14.1788	252.7	9.2232	251.1	19.6826	250.8	5.8472	250	22.8536
251.8	6.3729	251.5	13.566	252.8	9.5725	251.2	19.9747	250.9	6.5887	250.1	22.6367
252	6.4325	251.6	13.0975	252.9	8.6904	251.4	19.8042	251	5.0318	250.2	23.334
252.1	6.8212	251.8	13.0153	253	8.9741	251.5	20.1261	251.2	7.5388	250.3	22.5103
252.2	7.2801	251.9	12.821	253.1	7.9656	251.6	19.7065	251.3	7.2074	250.4	22.794
252.3	7.7546	252	12.5682	253.3	8.2147	251.7	21.2932	251.4	8.0144	250.5	23.4091
252.4	8.0121	252.1	12.2952	253.4	8.1658	251.8	20.1213	251.5	7.6354	250.6	23.4568
252.5	7.7069	252.2	13.1309	253.5	8.6033	251.9	18.4393	251.6	7.7796	250.8	24.5249
252.6	7.8964	252.3	13.0653	253.6	8.1956	252	18.8315	251.7	7.1955	250.9	24.0386
252.7	7.9322	252.4	13.6638	253.7	7.4756	252.2	18.9674	251.8	8.5604	251	24.6024
252.8	7.4673	252.5	13.9523	253.8	8.1182	252.3	21.0023	252	8.8537	251.1	25.245
253	7.4458	252.7	13.9952	253.9	7.1585	252.4	20.4575	252.1	8.2612	251.2	24.7264
253.1	6.4456	252.8	14.354	254.1	7.0286	252.5	18.9507	252.2	9.0134	251.3	25.5263
253.2	6.6674	252.9	14.9596	254.2	6.3407	252.6	18.8768	252.3	8.5497	251.4	26.3655
253.3	5.8258	253	14.7581	254.3	6.7937	252.8	18.959	252.4	8.7249	251.5	25.0733
253.4	5.9438	253.1	14.9381	254.4	6.212	252.9	20.0534	252.5	9.2816	251.6	26.12
253.5	6.5458	253.3	14.2741	254.5	5.5254	253	20.5219	252.6	8.6021	251.8	25.4488
253.6	5.7662	253.4	15.2504	254.7	6.2096	253.1	19.4609	252.7	8.9252	251.9	25.8279
253.8	6.5947	253.5	14.8702	254.8	5.6982	253.2	19.4824	252.8	9.2983	252	26.1426
253.9	6.1715	253.6	15.0585	254.9	5.7113	253.3	17.4141	253	9.5737	252.1	26.1045
254	6.4588	253.7	15.5234	255	6.4695	253.4	17.9148	253.1	9.9325	252.2	26.1009
254.1	6.1345	253.8	15.5985	255.1	6.3109	253.5	18.5251	253.2	9.9683	252.3	26.6314
254.2	6.4611	253.9	15.775	255.2	6.4898	253.6	18.599	253.3	9.439	252.4	26.2761
254.3	5.5659	254	15.862	255.3	7.0667	253.8	18.0674	253.4	8.57	252.5	26.6767
254.4	7.1383	254.2	16.309	255.4	6.9809	253.9	18.1031	253.5	8.9204	252.7	27.2501
254.5	6.1083	254.3	16.3543	255.6	7.0071	254	17.8826	253.6	8.533	252.8	27.2667
254.7	6.8867	254.4	16.7608	255.7	7.534	254.1	18.2354	253.8	7.5448	252.9	28.0893
254.8	6.8784	254.5	17.1745	255.8	7.7784	254.2	18.065	253.9	8.0299	253	26.6266
254.9	6.9165	254.6	16.5284	255.9	7.3576	254.3	18.9292	254	7.2718	253.1	27.5314
255	6.9308	254.8	17.3652	256	7.4613	254.5	17.8134	254.1	6.4075	253.2	26.9115
255.1	8.0788	254.9	17.1459	256.1	8.5986	254.5	17.7217	254.2	7.1502	253.3	26.3798
255.2	8.148	255	17.1101	256.1	8.7225	254.7	18.8613	254.3	7.0572	253.4	26.8614
255.3	8.6164	255.1	16.6714	256.2	9.0611	254.8	18.4953	254.4	6.7949	253.5	26.5622
255.4	8.5354	255.2	16.5987	256.4	9.2769	254.9	18.4691	254.5	6.8963	253.7	25.9841
255.5	8.9479	255.3	16.2494	256.4	8.6498	255	19.3381	254.7	6.5327	253.8	26.536
255.7	9.0742	255.4	16.0682	256.6	9.5141	255.1	18.6348	254.8	6.206	253.9	26.0925
255.8	8.8751	255.5	15.9967	256.7	9.8836	255.2	19.9294	254.9	6.0701	254	26.753
255.9	9.1076	255.7	15.7261	256.8	10.066	255.3	19.8853	255	6.2168	254.1	26.629
256	9.0969	255.8	15.4221	256.9	9.6619	255.5	19.691	255.1	6.423	254.2	27.045
256.1	8.5497	255.9	15.316	257.1	8.6749	255.6	19.8579	255.2	6.001	254.3	27.7412
256.1	9.6536	256	14.8737	257.2	9.2506	255.7	17.6108	255.3	5.852	254.4	27.3645
256.2	8.5723	256.1	14.5066	257.3	8.7214	255.8	18.94	255.4	5.517	254.6	27.7364
256.4	8.9502	256.1	13.9821	257.4	8.8835	255.9	16.9504	255.6	5.275	254.7	27.3943
256.5	8.626	256.2	14.2527	257.5	7.9334	256	16.3221	255.7	5.4812	254.8	27.4432
256.6	7.1144	256.4	14.1513	257.6	8.1885	256.1	15.7058	255.8	5.3942	254.9	25.3093
256.7	7.3934	256.5	13.628	257.7	7.6306	256.2	14.6973	255.9	5.2166	255	27.4932
256.8	7.4208	256.6	13.7556	257.9	7.6401	256.3	13.7949	256	5.1773	255.1	27.5862
256.9	7.062	256.7	13.8044	258	7.3397	256.4	15.1479	256.1	4.6599	255.2	26.6111
257	7.5877	256.8	13.1202	258.1	7.1168	256.5	14.6306	256.1	5.2404	255.3	26.4251
257.2	7.2873	256.9	13.3705	258.2	7.0369	256.6	15.4293	256.3	5.3644	255.4	27.2763
257.3	7.3445	257	13.6745	258.3	7.3171	256.7	15.7428	256.4	5.6481	255.5	27.4646
257.4	6.9499	257.2	13.8807	258.4	7.2277	256.8	16.8479	256.5	5.5146	255.7	28.0762
257.5	7.3695	257.3	13.5732	258.6	6.516	257	17.122	256.6	5.4586	255.8	28.4743
257.6	7.3862	257.4	13.1321	258.7	7.1847	257.1	17.8194	256.7	6.2251	255.9	27.4289
257.8	7.5543	257.5	13.5458	258.8	6.8891	257.2	18.2354	256.8	6.7306	256	27.7603
257.8	8.2982	257.6	13.2012	258.9	7.8976	257.3	18.3225	257	7.6199	256.1	28.789
258	7.2527	257.7	13.2906	259	8.2016	257.4	19.0651	257.1	7.3707	256.1	28.1489
258.1	7.8654	257.8	13.0415	259.1	7.776	257.5	18.8661	257.2	8.1849	256.2	28.9238
258.2	8.1193	258	12.5158	259.2	8.0109	257.6	18.5072	257.3	7.8821	256.3	28.3897
258.3	8.291	258.1	12.7721	259.3	9.1743	257.8	19.151	257.4	8.7905	256.5	28.8737
258.4	8.9026	258.2	12.6386	259.5	8.9252	257.9	18.3415	257.5	8.3029	256.6	29.2838
258.6	8.3351	258.3	13.2895	259.6	9.1624	258	18.611	257.6	8.4174	256.7	28.5709
258.7	8.5449	258.4	12.6934	259.7	10.0088	258.1	19.0878	257.7	8.1706	256.8	28.7366
258.8	7.8988	258.5	12.9402	259.8	9.8836	258.2	19.5324	257.8	7.2539	256.9	27.2834
258.9	7.8475	258.7	12.7673	259.9	10.1471	258.3	19.5861	257.9	7.3135	257	28.7557
259	7.3922	258.8	13.4373	260	9.7871	258.4	20.045	258.1	7.8261	257.1	28.4147
259.1	7.5507	258.9	13.7031	260.1	9.4342	258.6	19.846	258.2	7.36	257.2	28.5971
259.2	7.6008	259	13.8223	260.3	10.4284	258.7	18.4083	258.3	7.4387	257.3	27.7853
259.3	7.0965	259.1	13.5124	260.4	10.4773	258.8	20.839	258.4	7.5793	257.4	28.1537
259.4	7.6151	259.2	13.8485	260.5	9.9552	258.9	21.8737	258.5	7.5579	257.6	27.7615
259.5	8.0919	259.3	13.7603	260.6	10.4117	259	21.59	258.6	8.6916	257.7	27.3848
259.6	7.7999	259.5	14.4136	260.7	10.9112	259.1	21.8904	258.7	7.745	257.8	27.3085
259.8	8.1718	259.6	14.3242	260.8	9.8658	259.2	21.9405	258.9	6.7794	257.9	27.0188
259.9	7.9858	259.7	14.447	261	9.5963	259.4	21.0774	259	8.3673	258	27.8187
260	8.3363	259.8	14.4207	261.1	10.9029	259.5	22.217	259.1	8.1575	258.1	27.1869
260.1	8.0562	259.9	14.6592	261.2	10.8159	259.6	21.8618	259.2	7.6616	258.2	27.858
260.2	8.328	260	14.4029	261.3	10.289	259.7	21.9393	259.3	7.5579	258.3	27.5517
260.3	8.2505	260.1	14.8356	261.4	11.2462	259.8	22.4364	259.4	8.0657	258.5	26.7446
260.5	8.2469	260.3	14.416	261.5	9.8336	259.9	21.6925	259.5	8.6665	258.6	25.8732
260.6	8.018	260.4	14.4339	261.6	10.5262	260	22.2921	259.6	8.8668	258.7	26.0711
260.7	7.9644	260.5	14.4589	261.8	10.7026	260.2	22.409	259.7	8.3053	258.8	26.53
260.8	7.2014	260.6	14.7712	261.9	10.8123	260.3	22.1038	259.9	7.9167	258.9	24.6716
260.9	8.2183	260.7	14.2694	262	10.1388	260.4	20.9463	260	7.8356	259	24.7514
261.1	7.8976	260.8	14.3874	262.1	9.9623	260.5	21.6079	260.1	8.1086	259.1	23.1481
261.2	7.7116	260.9	14.5352	262.2	9.9671	260.6	21.4267	260.2	7.4124	259.2	23.7572
261.3	7.0786	261	14.8666	262.3	10.2043	260.7	21.3742	260.3	7.1728	259.3	25.4118
261.4	7.1609	261.2	14.5483	262.4	8.4114	260.8	21.857	260.4	7.0596	259.5	25.6419
261.5	7.1466	261.3	14.8809	262.6	10.0207	260.9	21.7927	260.5	7.1096	259.6	25.4571
261.6	7.993	261.4	14.7212	262.7	9.0516	261	21.1811	260.7	7.6962	259.7	25.6038
261.7	6.8641	261.5	15.2266	262.7	8.558	261.2	20.9045	260.8	7.1538	259.8	26.1939
261.8	7.3171	261.6	15.1753	262.8	9.1481	261.3	21.1108	260.9	7.8785	259.9	26.6004
262	7.5984	261.7	15.3768	262.9	9.5308	261.4	19.8841	261	7.7498	260	27.4444
262.1	7.6354	261.8	15.4412	263	8.508	261.5	20.8783	261.1	8.3005	260.1	26.3667
262.2	7.9811	261.9	15.7189	263.2	8.601	261.6	20.6208	261.2	8.0359	260.2	29.1491
262.3	8.26	262.1	15.6033	263.3	9.4724	261.7	19.1438	261.3	8.3876	260.4	27.3252
262.4	7.7736	262.2	15.6093	263.4	9.2959	261.8	20.4372	261.5	8.9097	260.5	27.8938
262.5	7.9858	262.3	15.1622	263.5	9.9134	262	19.4943	261.6	8.9085	260.6	27.7853
262.6	7.9227	262.4	15.3232	263.6	10.2568	262.1	19.3608	261.7	8.8191	260.7	26.5706
262.7	7.8785	262.5	15.1134	263.7	10.0553	262.2	18.5943	261.8	9.0015	260.8	27.1773
262.8	7.3671	262.6	15.2779	263.9	11.2832	262.3	19.0771	261.9	8.5568	260.9	27.3263
262.9	7.4184	262.7	15.0991	264	11.1496	262.4	18.6396	262	8.57	261	27.1976
263	7.0155	262.8	14.7259	264.1	11.2748	262.5	18.1937	262.1	8.3685	261.1	26.6206
263.1	7.9942	262.9	14.7915	264.2	11.7469	262.7	18.7838	262.2	8.7559	261.2	26.2225
263.3	7.9298	263	14.9882	264.3	11.9925	262.7	19.1927	262.3	8.0776	261.4	26.5157
263.3	7.7081	263.1	14.4863	264.4	11.2104	262.8	18.9352	262.5	7.9262	261.5	26.2225
263.5	8.204	263.2	15.0311	264.5	11.9674	262.9	18.6968	262.6	8.3792	261.6	26.0615
263.6	8.5783	263.3	14.9512	264.6	11.3094	263	18.7409	262.7	8.5902	261.7	26.5229
263.7	8.9705	263.5	14.9298	264.7	12.0425	263.1	18.8065	262.7	8.8847	261.8	25.965
263.8	9.1732	263.6	14.8976	264.8	11.1461	263.2	19.4871	262.8	9.464	261.9	26.9651
263.9	10.6025	263.7	15.6319	264.9	11.2247	263.3	18.667	262.9	9.0849	262	28.0547
264	9.6762	263.8	15.2242	265.1	9.9754	263.4	20.0367	263	10.0946	262.1	27.5135
264.2	10.4404	263.9	14.8165	265.2	11.0507	263.5	20.1261	263.2	9.65	262.2	28.2109
264.3	10.7598	264	14.9024	265.3	9.7775	263.7	20.4122	263.3	9.8395	262.4	29.2492
264.4	10.3641	264.1	15.5807	265.4	9.9266	263.8	20.808	263.4	10.0958	262.5	28.6365
264.5	9.5165	264.3	15.0347	265.5	9.793	263.9	21.4624	263.5	10.1852	262.6	29.757
264.6	10.1018	264.4	15.2457	265.6	9.5606	264	20.9725	263.6	9.3913	262.7	29.1395
264.7	9.2077	264.5	16.0027	265.8	9.0277	264.1	21.2371	263.7	9.4306	262.7	27.7257
264.8	9.0814	264.6	16.3126	265.9	8.8549	264.2	20.9594	263.8	9.2781	262.8	28.4612
265	9.5463	264.7	16.0885	266	9.5975	264.3	20.5719	264	9.0814	262.9	28.0035
265.1	8.8286	264.8	17.0898	266.1	9.1708	264.5	20.3419	264.1	8.8108	263	28.2216
265.2	8.4746	264.9	16.638	266.2	9.4235	264.6	19.834	264.2	8.8179	263.2	27.6995
265.3	9.1982	265	19.1164	266.3	9.6309	264.7	19.5193	264.3	8.3065	263.2	26.6361
265.4	8.8418	265.2	14.3528	266.4	9.8324	264.8	20.3693	264.4	9.1445	263.4	27.4396
265.5	9.557	265.3	15.3601	266.5	9.8133	264.9	19.1999	264.5	8.8358	263.5	26.2606
265.6	8.7643	265.4	15.372	266.6	10.0946	265	20.2131	264.6	9.2721	263.6	28.1012
265.8	9.5081	265.5	15.1336	266.8	10.0899	265.1	19.7399	264.7	9.4652	263.7	26.6886
265.9	9.5105	265.6	14.9322	266.9	10.7181	265.3	19.8257	264.9	9.6095	263.8	26.567
266	9.5904	265.7	14.8535	267	10.5274	265.4	19.9592	265	9.7513	263.9	26.6087
266.1	9.5201	265.8	14.1716	267.1	10.6454	265.5	19.7816	265.1	10.1078	264	27.2882
266.2	9.3782	266	14.7605	267.2	10.4463	265.6	20.231	265.2	9.7787	264.1	26.8841
266.3	9.6238	266.1	13.9058	267.3	10.5822	265.7	19.3119	265.3	10.2389	264.3	28.224
266.4	8.9264	266.2	14.5125	267.5	9.954	265.8	18.9388	265.4	8.0049	264.4	27.4992
266.6	9.4271	266.3	14.6496	267.6	10.3784	265.9	19.4776	265.5	10.4105	264.5	28.0321
266.7	9.0718	266.4	14.3707	267.7	10.19	266	18.6074	265.6	10.2317	264.6	28.7187
266.8	9.222	266.5	14.7915	267.8	9.6405	266.2	18.7969	265.8	9.6536	264.7	28.8785
266.9	8.3661	266.6	14.6902	267.9	10.0803	266.3	19.6457	265.9	8.9622	264.8	28.5316
267	8.5008	266.8	14.5555	268	9.5916	266.4	18.6861	266	8.7309	264.9	29.6021
267.1	8.0299	266.9	14.8094	268.1	10.1399	266.5	18.9519	266.1	8.6904	265	29.9442
267.2	8.6224	267	14.745	268.2	9.3794	266.6	20.6637	266.2	10.3521	265.2	30.067
267.4	7.7915	267.1	14.7378	268.4	10.6668	266.7	19.6385	266.3	9.079	265.3	29.918
267.5	8.496	267.2	15.626	268.5	9.8133	266.8	20.6077	266.4	9.0098	265.4	30.2124
267.6	8.5032	267.3	14.7569	268.6	10.2401	267	20.1404	266.6	7.9954	265.5	29.9346
267.7	8.5354	267.5	14.3993	268.7	10.0422	267.1	20.0903	266.7	8.4388	265.6	29.3672
267.8	8.7118	267.6	15.1062	268.8	10.9518	267.2	19.3572	266.8	8.3113	265.7	29.7046
267.9	9.4724	267.7	14.2586	268.9	9.5904	267.3	19.8448	266.9	8.0538	265.8	28.2502
268	10.0422	267.8	14.41	269	11.1878	267.4	19.2058	267	8.1015	265.9	28.6806
268.2	10.438	267.9	13.9785	269.2	11.5609	267.6	19.3584	267.1	7.9179	266.1	29.4328
268.3	11.1413	268	14.3206	269.3	10.5536	267.7	19.1903	267.2	8.0407	266.2	29.3744
268.4	10.5488	268.1	13.3157	269.4	11.6432	267.8	19.4573	267.3	7.9024	266.3	29.285
268.5	10.7074	268.2	15.0192	269.4	11.4751	267.9	19.8758	267.4	8.0502	266.4	28.6269
268.6	11.1341	268.3	14.1478	269.5	11.8196	268	19.9473	267.6	7.6318	266.5	27.9629
268.7	11.7326	268.5	14.1776	269.6	12.3394	268.1	19.6159	267.7	8.1515	266.6	28.7449
268.8	10.7753	268.6	15.3172	269.7	12.0115	268.2	21.0893	267.8	8.0347	266.7	29.2051
268.9	10.9088	268.7	15.7619	269.9	13.1154	268.3	22.2504	267.9	8.4221	266.8	28.671
269.1	10.3426	268.8	16.7131	270	12.6278	268.4	19.3512	268	8.4138	267	27.9295
269.2	10.4451	268.9	16.4628	270.1	13.3765	268.6	21.5673	268.1	8.1301	267.1	28.4886
269.3	10.2842	269	17.0457	270.2	13.3801	268.7	23.1767	268.2	7.9679	267.2	27.3657
269.4	9.7251	269.2	17.0839	270.3	13.0558	268.8	22.6212	268.3	7.9966	267.3	26.8662
269.4	9.7382	269.2	16.7835	270.4	14.1525	268.9	23.725	268.5	8.539	267.4	28.4052
269.6	9.2685	269.4	16.6106	270.5	13.0677	269	23.1457	268.6	8.6308	267.5	28.0941
269.7	9.5105	269.4	16.6941	270.6	12.7852	269.1	23.5379	268.7	8.5187	267.6	27.0581
269.8	10.1674	269.5	16.7441	270.8	13.0653	269.2	24.2984	268.8	8.4603	267.7	27.4396
269.9	9.9194	269.6	17.3235	270.9	11.0948	269.4	25.5144	268.9	8.1956	267.8	28.3837
270	9.6214	269.7	17.7896	271	11.7254	269.4	25.2569	269	8.3387	268	28.255
270.1	10.7217	269.8	16.6774	271.1	10.5226	269.5	25.5454	269.1	7.9799	268.1	29.3732
270.2	10.5476	270	16.7537	271.2	10.73	269.6	25.8839	269.3	8.0013	268.2	28.3265
270.3	10.6132	270.1	16.6237	271.3	10.4582	269.7	26.1605	269.4	7.838	268.3	29.4197
270.4	10.339	270.2	16.712	271.4	10.0219	269.8	26.2773	269.4	7.9167	268.4	29.093
270.5	10.4499	270.3	15.4316	271.6	9.1505	269.9	26.4204	269.5	6.5112	268.5	29.7761
270.7	10.3867	270.4	16.8133	271.7	9.2769	270.1	26.5014	269.6	8.8429	268.6	29.887
270.8	10.072	270.5	16.3066	271.8	9.6345	270.2	27.2357	269.7	8.3911	268.7	29.0942
270.9	10.339	270.6	16.3662	271.9	10.0756	270.3	26.1176	269.9	8.3637	268.8	30.3435
271	10.1912	270.8	16.0444	272	10.3736	270.4	25.9745	270	8.6057	269	29.2516
271.1	9.9325	270.9	15.6403	272.1	10.0744	270.5	25.8696	270.1	10.0148	269.1	29.3911
271.2	9.7322	271	14.956	272.2	10.1149	270.6	25.1901	270.2	10.0112	269.2	29.6056
271.3	10.2723	271.1	15.192	272.3	9.9516	270.7	25.8505	270.3	10.2258	269.3	29.0847
271.4	9.6917	271.2	14.6782	272.5	10.4594	270.8	25.2628	270.4	11.1794	269.4	29.3374
271.6	10.0553	271.3	15.4722	272.6	11.301	271	25.3761	270.5	11.0102	269.4	29.2623
271.7	9.9218	271.4	12.8758	272.7	11.4751	271.1	25.1722	270.6	12.0008	269.5	29.043
271.8	9.2888	271.5	14.1883	272.8	12.0485	271.2	25.6491	270.8	11.6217	269.6	29.3338
271.9	9.2161	271.6	14.503	272.9	11.4632	271.3	25.5156	270.9	11.7636	269.8	28.7855
272	9.8562	271.8	13.2525	273	11.7493	271.4	26.108	271	11.9972	269.9	28.497
272.1	9.197	271.9	13.3467	273.2	11.5943	271.5	24.581	271.1	11.605	270	28.5256
272.2	9.1767	272	14.0393	273.2	11.9722	271.6	25.6968	271.2	11.4584	270.1	27.6423
272.4	10.1829	272.1	14.5865	273.4	11.5955	271.8	25.3725	271.3	11.2259	270.2	26.6469
272.5	8.3542	272.2	14.9965	273.5	10.8242	271.9	25.9149	271.4	11.1234	270.3	27.2226
272.6	9.1195	272.4	15.8358	273.6	11.1771	272	24.7753	271.5	11.2033	270.4	28.5447
272.7	9.383	272.5	16.1278	273.7	11.4214	272.1	26.1307	271.6	10.6704	270.6	28.9857
272.8	9.5284	272.6	17.6036	273.8	11.8005	272.2	25.8291	271.7	10.6096	270.7	28.038
272.9	9.4414	272.7	16.8788	274	11.3201	272.3	24.6656	271.8	9.9123	270.8	29.2051
273	10.0911	272.8	17.2782	274	12.6195	272.4	25.8088	272	10.1841	270.9	28.9202
273.1	9.5165	272.9	17.9327	274.2	11.9579	272.6	25.3272	272.1	9.2757	271	29.2349
273.3	10.6537	273	18.1758	274.3	12.0401	272.7	24.4391	272.2	10.2448	271.1	30.0634
273.4	11.5049	273.1	18.3094	274.4	12.8078	272.8	25.0649	272.3	10.519	271.2	29.6211
273.5	11.27	273.2	18.5668	274.5	13.0487	272.9	24.2078	272.4	10.4225	271.3	30.005
273.6	10.7741	273.4	18.9006	274.6	13.1166	273	23.8347	272.5	10.1423	271.4	28.8105
273.7	11.7922	273.5	18.1115	274.7	13.3228	273.1	22.0239	272.7	10.4082	271.5	28.8343
273.8	12.0103	273.6	17.5905	274.9	13.6626	273.2	23.8407	272.8	10.9804	271.6	29.0358
273.9	12.3537	273.7	17.8492	275	13.5458	273.3	24.4415	272.9	11.7707	271.8	29.0895
274.1	13.4087	273.8	17.3569	275.1	13.6375	273.5	23.7775	273	11.3356	271.9	29.2099
274.2	12.3727	274	16.6881	275.2	13.4289	273.6	24.2054	273.1	11.6491	272	28.7008
274.3	12.3274	274.1	16.3054	275.3	14.1597	273.7	24.662	273.2	11.3869	272.1	28.5792
274.4	13.1321	274.2	16.5105	275.4	14.3158	273.8	24.7085	273.3	11.6491	272.2	29.1431
274.5	13.3789	274.3	16.2399	275.5	13.9606	273.9	24.8528	273.4	11.7505	272.3	29.5067
274.6	13.3991	274.4	16.2292	275.6	14.503	274	25.084	273.6	11.2581	272.4	27.6184
274.7	13.7353	274.5	16.7978	275.8	14.1203	274.1	25.0351	273.7	11.5168	272.5	30.5963
274.9	12.4133	274.6	15.9061	275.9	14.4959	274.3	25.5203	273.8	11.2426	272.7	29.9227
275	13.0439	274.7	16.9122	276	14.4982	274.4	24.7788	273.9	10.8826	272.8	29.4185
275.1	12.4836	274.8	16.6965	276.1	13.727	274.5	24.2889	274	10.7408	272.9	29.9346
275.2	13.2132	274.9	17.1959	276.1	14.4947	274.6	25.419	274.1	10.5834	273	29.5639
275.3	13.4742	275.1	17.2246	276.2	14.5042	274.7	23.9229	274.2	10.7205	273.1	30.1695
275.4	13.2096	275.2	17.432	276.3	14.5292	274.8	23.1397	274.3	10.5572	273.2	30.0467
275.5	13.181	275.3	17.6251	276.5	13.8688	274.9	22.8965	274.4	11.059	273.3	30.0825
275.6	13.0892	275.4	17.612	276.6	15.1134	275	23.9038	274.6	10.3891	273.4	30.1218
275.8	13.5636	275.5	17.6156	276.7	14.4267	275.1	23.6654	274.7	10.5309	273.5	29
275.9	14.0142	275.6	18.5537	276.8	14.7176	275.2	23.4818	274.8	10.587	273.7	29.8512
276	13.6614	275.7	18.2199	276.9	14.801	275.4	22.0871	274.9	10.4392	273.8	29.9919
276.1	12.9306	275.8	19.2034	277	15.0669	275.5	24.91	275	10.9351	273.9	29.0668
276.1	13.5243	275.9	19.0783	277.1	14.8964	275.6	25.3093	275.1	10.761	274	29.1455
276.2	12.7351	276.1	19.9997	277.2	15.3053	275.7	25.4858	275.2	10.5166	274.1	28.9524
276.3	13.4456	276.1	20.3693	277.4	15.3458	275.8	25.3391	275.4	10.4392	274.2	28.7783
276.5	13.0785	276.2	20.7198	277.5	15.8405	276	26.1617	275.5	9.8002	274.3	29.1109
276.6	13.4945	276.3	20.5529	277.6	15.3768	276.1	26.9187	275.6	10.1984	274.4	28.553
276.7	13.2978	276.4	23.5736	277.7	16.079	276.1	27.7793	275.7	10.3724	274.5	28.8665
276.8	13.0439	276.5	19.424	277.8	16.0694	276.2	27.4789	275.8	8.8561	274.7	28.8606
276.9	13.1381	276.7	19.5265	277.9	16.4914	276.3	27.138	275.9	7.9799	274.8	28.6961
277.1	13.2656	276.8	19.1236	278	16.4032	276.4	25.6383	276	9.6464	274.9	29.5043
277.2	12.4574	276.9	20.026	278.2	15.5699	276.5	26.921	276.1	9.3329	275	29.0787
277.3	13.0272	277	19.8865	278.3	15.2743	276.6	25.7969	276.1	9.5034	275.1	29.2909
277.4	12.3084	277.1	19.5086	278.4	15.5246	276.8	25.6658	276.3	9.4378	275.2	29.7368
277.5	12.3346	277.2	19.4514	278.5	14.6961	276.9	25.4536	276.4	9.6905	275.3	28.2764
277.6	12.1439	277.3	20.1273	278.6	14.3886	277	24.2424	276.5	9.9683	275.4	28.9786
277.7	11.5538	277.4	20.0307	278.7	14.8046	277.1	23.2875	276.6	10.6752	275.5	28.0297
277.8	11.6801	277.6	20.6494	278.8	14.472	277.2	25.0232	276.7	10.4809	275.6	28.3003
277.9	11.6301	277.7	20.2727	279	14.3838	277.3	24.4272	276.8	11.5383	275.7	28.7604
278.1	12.902	277.8	21.3528	279.1	14.9512	277.4	24.9791	276.9	11.27	275.9	28.7008
278.2	12.1808	277.9	21.7271	279.2	14.4696	277.5	24.8396	277	10.4475	276	28.4946
278.3	12.8102	278	22.862	279.3	14.9655	277.7	23.905	277.2	11.8673	276.1	28.7104
278.4	12.9008	278.2	22.5794	279.4	14.7164	277.7	25.5311	277.3	11.692	276.1	28.7724
278.5	13.5624	278.3	23.5188	279.5	14.503	277.9	25.1246	277.4	11.2796	276.2	29.6962
278.6	12.9259	278.4	23.9551	279.6	15.2493	278	24.8063	277.5	12.4979	276.3	29.074
278.7	13.7126	278.5	24.2543	279.8	15.1634	278.1	25.7897	277.6	12.0819	276.5	29.4924
278.9	13.8247	278.6	24.1995	279.9	14.9632	278.2	24.6704	277.7	12.7506	276.6	29.4149
279	13.119	278.7	24.3187	280	14.571	278.3	26.1056	277.8	12.8877	276.7	30.2196
279.1	13.9248	278.8	24.302	280.1	14.9715	278.4	26.2666	277.9	12.8245	276.8	30.0598
279.2	13.5183	279	24.1005	280.1	15.3601	278.5	26.0448	278.1	13.324	276.9	29.7082
279.3	14.3898	279.1	24.6632	280.2	15.4769	278.7	26.6981	278.2	12.6874	277	30.3412
279.4	13.9332	279.2	24.5488	280.3	15.3768	278.8	27.2572	278.3	13.4707	277.1	29.5627
279.5	13.5946	279.3	24.0219	280.4	15.6224	278.9	24.8814	278.4	13.2549	277.2	31.085
279.6	13.7889	279.4	23.8872	280.5	15.3565	279	26.9556	278.5	12.9676	277.4	31.4677
279.8	14.5423	279.5	24.0731	280.7	15.707	279.1	26.0031	278.6	13.5112	277.4	31.0516
279.9	13.5696	279.6	23.7906	280.8	15.8119	279.2	26.5801	278.7	13.5088	277.6	31.2972
280	13.5517	279.8	23.3924	280.9	15.3065	279.3	26.0794	278.8	13.7246	277.7	30.9885
280.1	13.9248	279.9	23.8872	281	15.3577	279.4	25.7957	279	13.1834	277.8	31.7216
280.1	13.6447	280	23.613	281.1	16.185	279.5	26.4299	279.1	14.2181	277.9	31.6227
280.2	13.3634	280.1	23.5868	281.2	15.353	279.7	26.2857	279.2	13.1917	278	29.8917
280.3	13.4349	280.1	23.5105	281.3	15.8548	279.8	27.4587	279.3	12.8555	278.1	31.4736
280.4	12.7852	280.2	23.8693	281.4	15.769	279.9	27.9021	279.4	12.6183	278.2	30.5152
280.6	13.2835	280.3	24.0254	281.6	15.4376	280	27.0271	279.5	12.2643	278.4	30.4818
280.7	13.4408	280.5	24.662	281.7	16.6392	280.1	28.0583	279.6	11.7958	278.5	30.694
280.8	13.9809	280.6	24.2281	281.8	15.4316	280.1	27.2143	279.8	11.282	278.6	29.8476
280.9	13.5756	280.7	25.0649	281.9	16.917	280.2	27.6518	279.9	11.2546	278.7	30.1623
281	14.2455	280.8	24.7896	282	16.2494	280.3	27.6756	280	10.8767	278.8	30.365
281.1	15.2087	280.9	24.9171	282.1	17.1244	280.5	28.1346	280.1	8.1897	278.9	29.6652
281.2	15.2659	281	25.7587	282.2	17.8945	280.6	27.6828	280.1	9.6667	279	29.9895
281.3	15.0085	281.2	26.0484	282.4	17.2985	280.7	27.3979	280.2	11.9197	279.1	30.3495
281.4	15.5747	281.3	25.6574	282.5	17.4642	280.8	26.7923	280.3	12.0533	279.3	28.7938
281.6	15.527	281.4	25.9495	282.6	17.8862	280.9	27.9546	280.4	12.1915	279.4	29.5603
281.7	16.5057	281.5	25.4452	282.7	17.5977	281	26.9759	280.6	12.8317	279.5	30.2661
281.8	16.0527	281.6	25.6264	282.8	18.7004	281.1	28.1882	280.7	13.293	279.6	31.1804
281.9	16.017	281.7	25.5072	282.9	18.4536	281.3	26.9473	280.8	14.7688	279.7	30.7536
282	16.0122	281.9	25.9137	283.1	17.966	281.4	26.542	280.9	15.5222	279.8	30.6761
282.1	16.0062	282	25.5132	283.2	18.9567	281.5	27.0474	281	14.9775	279.9	31.1005
282.2	15.0561	282.1	25.6133	283.3	18.8267	281.6	26.4347	281.1	15.7952	280	31.0135
282.4	15.3625	282.2	24.7622	283.4	19.2666	281.7	26.71	281.2	15.0979	280.1	31.2579
282.5	15.223	282.3	25.4309	283.5	19.4168	281.8	27.1928	281.3	15.3148	280.2	31.1959
282.6	15.5902	282.4	24.7049	283.6	19.0055	281.9	26.4776	281.5	14.9763	280.3	30.75
282.7	15.7189	282.5	25.3701	283.7	19.5694	282	27.7805	281.6	15.2075	280.4	31.4629
282.8	14.9918	282.7	25.1901	283.8	19.3	282.1	28.6341	281.7	14.1406	280.5	30.2422
282.9	15.3697	282.8	25.8386	283.9	19.1665	282.3	29.3422	281.8	14.4112	280.6	30.8883
283	14.7975	282.9	25.9602	284.1	19.1093	282.4	28.3432	281.9	14.3027	280.7	30.117
283.1	15.5532	283	26.2463	284.1	19.1987	282.5	31.4498	282	14.1871	280.9	30.3173
283.3	15.2648	283.1	26.2594	284.2	19.3858	282.6	31.3997	282.1	13.3133	281	29.9132
283.4	15.9955	283.2	26.6218	284.3	19.1319	282.7	32.351	282.2	13.3634	281.1	30.2291
283.5	15.9895	283.3	27.2584	284.4	19.0067	282.8	31.569	282.4	13.1786	281.2	29.937
283.6	14.7176	283.4	27.4062	284.5	20.3693	282.9	32.8696	282.5	13.6352	281.3	29.7987
283.7	14.5447	283.5	27.2632	284.6	19.1927	283.1	31.6417	282.6	13.2978	281.4	29.7475
283.8	14.9345	283.7	27.4324	284.7	19.7506	283.2	33.6969	282.7	13.6483	281.5	28.5685
284	15.7535	283.8	27.864	284.9	20.7722	283.3	33.6897	282.8	13.6077	281.6	30.1397
284.1	14.7212	283.9	27.6375	285	20.0331	283.4	32.4392	282.9	13.237	281.8	30.5283
284.1	15.1634	284	27.7257	285.1	20.2251	283.5	32.9137	283.1	13.7579	281.9	30.396
284.2	14.8797	284.1	28.1823	285.2	20.5231	283.6	33.0997	283.1	14.0548	282	30.3972
284.3	14.6389	284.2	27.9117	285.3	20.5457	283.7	32.8374	283.2	14.4923	282.1	30.8454
284.4	14.8237	284.3	27.9903	285.4	20.8497	283.9	32.6788	283.4	13.9689	282.2	30.9026
284.5	15.8048	284.4	28.6043	285.6	20.1511	284	32.2676	283.5	14.0989	282.3	31.1589
284.6	15.8393	284.5	27.9665	285.7	20.7818	284.1	31.7383	283.6	14.1191	282.4	32.2628
284.8	16.017	284.6	28.5399	285.8	19.7268	284.1	31.1613	283.7	13.4766	282.5	32.2139
284.9	16.0408	284.7	29.0251	285.9	20.1166	284.2	31.0063	283.8	13.2442	282.7	32.9065
285	16.0337	284.9	28.7056	286	19.8185	284.3	30.4389	283.9	12.6159	282.8	32.4893
285.1	16.9635	285	29.1693	286.1	20.2322	284.4	31.4105	284.1	11.9317	282.9	33.0889
285.2	16.7143	285.1	29.6831	286.2	20.107	284.5	29.7201	284.1	12.2011	283	32.8076
285.3	17.8993	285.2	29.875	286.3	18.7862	284.6	30.5164	284.2	11.2736	283.1	32.3248
285.5	17.5691	285.3	30.3853	286.5	18.6884	284.8	30.117	284.3	10.9696	283.2	32.4988
285.6	17.3342	285.4	30.1731	286.6	18.9579	284.9	30.6237	284.4	12.4073	283.3	30.9444
285.7	17.3295	285.5	30.4091	286.7	18.065	285	30.8442	284.5	10.9768	283.4	30.5319
285.8	18.2056	285.6	30.8013	286.8	18.3201	285.1	30.2303	284.6	11.8995	283.5	30.2553
285.9	18.3439	285.8	30.7381	286.9	18.0161	285.2	31.0326	284.8	12.5813	283.7	29.0275
286	18.1258	285.9	30.5235	287	18.0423	285.3	30.6892	284.9	12.9342	283.8	29.8476
286.1	18.1985	286	30.5522	287.2	18.3296	285.4	29.5436	285	13.8628	283.9	29.8452
286.2	18.4321	286.1	30.9634	287.3	19.2475	285.6	29.9144	285.1	14.1466	284	29.6092
286.4	18.4798	286.2	31.1577	287.4	18.6539	285.7	29.4817	285.2	13.9225	284.1	28.9249
286.5	18.5668	286.3	31.6477	287.5	19.8221	285.8	29.4423	285.3	14.4064	284.1	29.3279
286.6	18.1294	286.5	31.0838	287.6	19.8805	285.9	26.778	285.4	14.4899	284.2	29.4459
286.7	18.394	286.6	31.4367	287.7	21.2371	286	28.5518	285.5	14.8523	284.3	29.8262
286.8	18.4131	286.7	32.0339	287.8	22.2349	286.1	27.2858	285.6	15.0383	284.4	29.844
286.9	18.9841	286.8	32.5596	287.9	22.155	286.2	27.2906	285.8	14.7629	284.6	29.1622
287	19.4848	286.9	31.9314	288	21.6711	286.4	26.0961	285.9	15.3601	284.7	29.211
287.1	19.4943	287	32.6109	288.1	22.9001	286.5	26.1545	286	13.8235	284.8	30.1361
287.3	19.8698	287.2	32.8887	288.2	22.2921	286.6	26.9687	286.1	14.0667	284.9	29.4054
287.4	20.6542	287.3	32.9351	288.3	21.9739	286.7	25.5871	286.2	13.2656	285	30.4759
287.5	20.4039	287.4	33.2761	288.4	22.4423	286.8	26.8352	286.3	13.3491	285.1	29.7999
287.6	19.5742	287.5	33.3583	288.5	21.6925	286.9	26.8292	286.5	12.4753	285.2	30.6273
287.7	20.2823	287.6	33.2713	288.6	21.6246	287	26.5551	286.6	12.3954	285.3	31.2102
287.8	20.2704	287.7	33.6111	288.8	21.7485	287.1	26.7947	286.7	13.3109	285.4	30.756
287.9	21.0834	287.9	34.1237	288.9	21.5578	287.3	26.6779	286.8	12.1021	285.6	32.0745
288.1	20.2549	288	34.3597	289	21.9548	287.4	28.0929	286.9	12.8305	285.7	32.5835
288.1	20.0677	288.1	34.312	289.1	21.7569	287.5	28.5721	287	12.1927	285.8	32.2449
288.2	21.1191	288.1	34.9987	289.2	22.2623	287.6	30.1254	287.1	12.3942	285.9	32.934
288.3	21.8773	288.2	34.5373	289.3	22.4853	287.7	29.7833	287.2	12.8901	286	32.9995
288.4	21.8821	288.3	34.7614	289.4	21.9679	287.8	30.8418	287.3	13.845	286.1	32.1293
288.5	21.559	288.4	35.6078	289.6	22.6843	287.9	31.0659	287.5	13.4921	286.2	32.2557
288.6	21.4326	288.5	35.5232	289.7	22.5616	288	31.7514	287.6	14.3504	286.3	31.7192
288.7	21.2729	288.6	35.4934	289.8	22.9919	288.1	31.6536	287.7	13.9225	286.5	32.5298
288.9	21.683	288.8	36	289.9	23.4616	288.2	32.0303	287.8	13.9916	286.6	32.053
289	22.5925	288.9	36.509	290	23.3018	288.3	30.8144	287.9	14.3683	286.7	30.7584
289.1	22.3088	289	36.6843	290.1	23.2995	288.4	30.514	288	13.9081	286.8	32.2604
289.2	21.6591	289.1	36.9072	290.2	24.3163	288.5	28.9106	288.1	13.6173	286.9	32.1031
289.3	21.8129	289.2	36.9489	290.3	22.8846	288.6	29.1109	288.1	14.509	287	31.5142
289.4	22.1276	289.3	36.8404	290.5	23.7119	288.7	29.5925	288.3	13.2275	287.1	33.1461
289.5	21.4577	289.4	36.8905	290.5	23.402	288.8	28.7688	288.4	14.1644	287.2	32.8279
289.6	21.9357	289.6	36.875	290.7	22.1372	289	28.8951	288.5	14.1251	287.3	32.7635
289.7	21.9679	289.7	36.9477	290.8	22.0597	289.1	27.8294	288.6	14.4672	287.4	32.4428
289.9	22.5556	289.8	36.3088	290.9	22.7022	289.2	28.4445	288.7	14.3206	287.6	33.3691
290	22.2707	289.9	37.2314	291	21.1966	289.3	27.9605	288.8	14.9024	287.7	34.1249
290.1	23.4509	290	36.3135	291.1	20.8569	289.4	30.6356	288.9	15.372	287.8	33.5503
290.2	23.3138	290.1	36.5865	291.2	21.2741	289.5	29.9752	289.1	15.471	287.9	33.9341
290.3	24.0278	290.3	36.6414	291.4	20.6888	289.6	30.8442	289.2	15.5783	288	33.0472
290.4	23.6928	290.4	36.391	291.5	21.4076	289.7	32.171	289.3	16.3651	288.1	33.9139
290.5	24.1816	290.5	36.5818	291.6	21.1346	289.9	32.27	289.4	16.6023	288.1	34.529
290.7	23.7799	290.6	36.9847	291.7	21.0273	290	33.0663	289.5	16.5534	288.2	33.8435
290.8	24.0183	290.7	36.5853	291.8	21.6126	290.1	31.7645	289.6	17.3271	288.3	33.2928
290.9	23.6702	290.8	37.1814	291.9	22.1169	290.2	34.3156	289.7	16.619	288.5	33.7088
291	23.6249	290.9	37.0264	292	21.8129	290.3	33.4394	289.8	17.3605	288.6	33.3393
291.1	22.9704	291.1	37.5474	292.1	21.7903	290.4	34.3096	290	17.4582	288.7	32.9316
291.2	23.4652	291.2	37.3852	292.2	22.5866	290.5	33.9341	290	17.3867	288.8	33.2463
291.3	23.2744	291.3	38.3592	292.3	22.5353	290.7	34.6255	290.1	17.5548	288.9	33.1104
291.4	23.2708	291.4	38.2018	292.4	22.6188	290.8	34.7686	290.3	17.6525	289	33.0639
291.6	23.8967	291.5	38.7907	292.5	22.3458	290.9	34.1702	290.4	17.7586	289.1	32.6419
291.7	23.3746	291.6	38.7681	292.6	22.7594	291	34.4563	290.5	17.3843	289.2	32.8195
291.8	24.5106	291.8	39.1603	292.7	23.0265	291.1	34.1296	290.6	17.1912	289.3	33.0401
291.9	24.3437	291.9	39.1316	292.8	22.403	291.2	32.6312	290.7	17.8218	289.5	32.9328
292	25.3439	292	39.8004	293	23.3269	291.3	33.4859	290.8	17.004	289.6	33.9627
292.1	25.2283	292.1	39.4344	293.1	22.7201	291.4	33.5538	291	17.2496	289.7	34.4229
292.2	25.2771	292.1	40.0662	293.2	23.8299	291.5	32.2807	291	17.0112	289.8	34.9689
292.3	25.723	292.2	39.8517	293.3	22.2158	291.7	32.5763	291.2	17.1042	289.9	34.256
292.4	25.6336	292.3	40.7493	293.4	23.2375	291.7	32.2473	291.3	17.7252	290	34.6482
292.5	26.3214	292.4	41.4801	293.5	24.0409	291.9	30.6809	291.4	17.6716	290.1	34.1988
292.6	26.1927	292.5	41.8389	293.7	23.9897	292	32.3558	291.5	18.2068	290.2	34.7042
292.7	25.8946	292.7	41.8258	293.7	24.6429	292.1	32.3951	291.6	18.1866	290.4	33.9365
292.8	25.388	292.8	42.9201	293.9	24.2794	292.1	32.5429	291.7	18.183	290.5	33.7863
292.9	25.5919	292.9	42.9189	294	25.0542	292.2	31.7109	291.8	18.0423	290.6	34.1153
293.1	25.7492	293	42.7032	294.1	26.2213	292.3	33.8697	291.9	18.4536	290.7	34.0176
293.2	25.6109	293.1	43.0822	294.2	25.748	292.5	33.4108	292.1	16.3198	290.8	32.804
293.3	25.1508	293.2	43.3397	294.3	26.2165	292.6	33.4263	292.1	18.4512	290.9	35.907
293.4	24.8194	293.3	43.3636	294.4	26.468	292.7	34.163	292.2	18.8649	291	36.4852
293.5	24.0636	293.5	43.2801	294.6	27.5111	292.8	33.6719	292.3	16.3651	291.1	37.812
293.6	24.6131	293.6	42.7735	294.7	26.8996	292.9	34.4884	292.4	18.0495	291.2	39.7468
293.7	23.9444	293.7	42.8271	294.8	27.4694	293	33.1903	292.5	17.7991	291.3	41.765
293.8	24.5726	293.8	42.5232	294.9	28.2443	293.1	33.0508	292.6	18.0566	291.5	44.1158
294	23.5665	293.9	42.702	295	27.5266	293.2	34.0211	292.7	18.909	291.6	46.7598
294.1	24.2162	294	42.6567	295.1	27.734	293.4	32.8314	292.9	18.8983	291.7	47.3607
294.2	24.4057	294.2	42.671	295.2	26.3417	293.5	32.7134	293	19.3179	291.8	49.7603
294.3	25.1269	294.3	42.6984	295.4	27.4026	293.6	33.1223	293.1	19.1867	291.9	49.4874
294.4	25.5656	294.4	43.1633	295.5	27.1761	293.7	33.046	293.2	19.1402	292	48.7459
294.5	26.3572	294.5	42.82	295.6	25.6252	293.8	32.4988	293.3	19.2845	292.1	48.9223
294.6	26.2988	294.6	43.602	295.7	26.0961	293.9	33.6289	293.4	18.8255	292.2	48.188
294.7	26.7315	294.7	43.7748	295.8	26.2821	294	32.2092	293.6	19.1224	292.3	47.493
294.8	26.871	294.8	43.813	295.9	25.9888	294.2	33.8399	293.7	18.6026	292.4	46.3116
295	28.1906	295	43.4983	296	26.4227	294.3	34.1761	293.8	17.9315	292.5	45.079
295.1	27.9665	295.1	43.8428	296.1	27.1213	294.4	34.0104	293.9	17.6942	292.6	44.7571
295.2	27.6852	295.2	43.9692	296.1	26.8149	294.5	34.1725	294	18.1615	292.7	43.0238
295.3	27.7734	295.3	43.8607	296.3	27.4956	294.6	33.7076	294.1	18.543	292.8	43.1633
295.4	27.0021	295.4	43.6115	296.4	26.9985	294.7	35.3873	294.2	19.0115	292.9	42.5804
295.5	27.0116	295.5	44.5271	296.5	28.5125	294.8	36.062	294.3	18.5752	293	41.7197
295.6	27.3454	295.7	43.5114	296.6	27.0319	295	36.0906	294.5	18.5072	293.1	40.7803
295.7	27.3383	295.8	43.9262	296.7	27.8771	295.1	36.8059	294.5	19.0532	293.3	40.3011
295.9	27.3919	295.9	43.2551	296.8	28.1012	295.2	35.9905	294.7	19.536	293.4	40.4322
296	27.4265	296	43.7689	296.9	28.6794	295.3	36.2217	294.8	19.6517	293.5	40.0925
296.1	27.3764	296.1	43.9799	297	28.2609	295.4	37.7297	294.9	19.5026	293.6	39.7801
296.1	27.8056	296.1	43.6723	297.2	28.193	295.5	37.1099	295	19.5587	293.7	38.3306
296.2	27.4372	296.2	42.3527	297.3	27.9629	295.6	36.3231	295.1	19.325	293.8	37.9849
296.3	27.9522	296.3	43.5686	297.4	27.7865	295.7	37.626	295.2	19.8257	293.9	38.6798
296.4	27.8688	296.5	44.6641	297.5	27.4015	295.9	36.844	295.3	19.145	294	37.9551
296.6	28.4112	296.6	45.7037	297.6	27.2799	296	38.2078	295.4	19.387	294.2	37.5724
296.7	28.1286	296.7	46.0351	297.7	26.989	296.1	37.0336	295.6	19.2964	294.3	36.701
296.8	28.5232	296.8	46.624	297.8	26.7732	296.1	37.9503	295.7	19.0341	294.4	34.9128
296.9	28.2383	296.9	47.4548	298	26.3107	296.2	36.8786	295.8	18.2414	294.5	35.9225
297	27.9141	297	47.1795	298.1	26.9282	296.3	37.8668	295.9	17.699	294.6	35.6126
297.1	28.286	297.1	48.0318	298.2	25.9268	296.4	38.1827	296	19.2738	294.7	33.0365
297.2	28.8081	297.3	47.8458	298.3	26.0329	296.5	37.3018	296.1	18.8196	294.8	34.9212
297.4	29.0298	297.4	48.4085	298.4	26.2094	296.7	36.67	296.1	19.6397	295	33.7637
297.5	28.3468	297.5	49.6996	298.5	26.8745	296.8	37.5426	296.2	19.3715	295.1	34.6804
297.6	28.9178	297.6	48.573	298.6	26.5181	296.9	35.6817	296.4	19.9246	295.2	33.3667
297.7	29.5353	297.7	49.1083	298.8	26.7518	297	35.9547	296.5	20.5934	295.3	34.4253
297.8	28.8451	297.8	49.603	298.9	27.5767	297.1	34.2643	296.6	21.4124	295.4	34.2429
297.9	29.7415	297.9	51.5354	299	27.6995	297.2	35.2836	296.7	21.8117	295.5	34.3263
298	28.6448	298	50.5698	299.1	27.1189	297.3	36.0096	296.8	21.9309	295.6	35.1489
298.1	29.9823	298.2	51.5735	299.2	27.8688	297.4	34.2929	296.9	22.4137	295.7	34.4169
298.3	29.0918	298.3	51.0681	299.3	27.3478	297.6	36.4518	297	22.7857	295.8	35.2585
298.4	28.9583	298.4	52.321	299.4	27.5338	297.7	35.5327	297.2	22.4781	295.9	35.4397
298.5	29.9859	298.5	51.6725	299.5	27.8246	297.8	34.5814	297.3	22.1467	296	35.4207
298.6	30.3721	298.6	52.1004	299.7	27.4444	297.9	37.1707	297.4	22.4578	296.1	36.1025
298.7	30.4854	298.7	52.2232	299.8	27.2119	298	37.5545	297.5	21.9345	296.2	35.2442
298.8	30.818	298.9	52.3424	299.9	28.3396	298.1	37.3375	297.6	22.1086	296.3	35.7413
298.9	30.4782	299	51.7845	300	28.1644	298.2	37.3173	297.7	21.7724	296.4	36.1288
299	31.1756	299.1	53.1757	300.1	29.4554	298.3	36.3815	297.9	21.3885	296.5	36.5007
299.1	32.1078	299.2	52.017	300.1	29.4423	298.4	38.6488	297.9	21.2419	296.6	36.5472
299.2	31.0278	299.3	52.6679	300.2	30.1063	298.6	37.7834	298.1	20.3013	296.7	36.2265
299.4	31.5583	299.4	52.9683	300.3	30.4842	298.7	36.1455	298.2	20.9427	296.9	35.4838
299.5	31.4629	299.5	53.0064	300.5	30.4794	298.8	36.8428	298.3	20.6375	296.9	35.6412
299.6	31.7013	299.7	53.4058	300.6	31.7371	298.9	35.4576	298.4	21.1406	297.1	35.7354
299.7	30.6106	299.8	53.2901	300.7	31.9886	299	35.6746	298.5	21.2634	297.2	35.7628
299.8	31.0743	299.9	53.5047	300.8	32.0458	299.1	35.5113	298.6	21.5578	297.3	37.0884
299.9	30.9348	300	53.5953	300.9	32.2247	299.2	34.7829	298.7	21.5244	297.4	35.8689
300	31.7216	300.1	53.2031	301	32.8457	299.4	33.704	298.8	21.8093	297.5	37.1754
300.1	31.4999	300.1	54.0292	301.2	31.7168	299.5	33.0484	299	22.1717	297.6	36.85
300.2	31.5106	300.2	53.5274	301.3	32.3081	299.6	34.7841	299.1	22.701	297.7	36.6187
300.3	32.078	300.4	54.4131	301.4	31.9934	299.7	34.7567	299.2	22.4268	297.8	35.8403
300.4	32.1734	300.5	53.9076	301.5	31.5404	299.8	34.2941	299.3	22.4638	297.9	37.1134
300.5	33.0997	300.6	54.4107	301.6	32.1412	299.9	35.224	299.4	21.5638	298.1	37.1242
300.6	33.7482	300.7	54.6396	301.7	31.0779	300	35.6543	299.5	21.5364	298.2	36.9763
300.7	34.2381	300.8	54.58	301.8	31.1673	300.1	34.3835	299.6	21.1406	298.3	36.0549
300.8	34.9665	300.9	54.6408	301.9	30.8752	300.2	37.6511	299.7	20.8592	298.4	36.0501
301	35.0905	301	54.9746	302	31.445	300.3	37.4293	299.9	20.2084	298.5	36.3863
301.1	35.3134	301.2	53.8063	302.1	31.5118	300.4	36.9823	299.9	20.1404	298.7	36.6473
301.2	35.8892	301.3	54.2533	302.3	32.3629	300.5	37.0944	300.1	20.2012	298.8	37.2648
301.3	37.055	301.4	53.9863	302.4	31.5917	300.6	36.8416	300.1	20.4575	298.9	36.6473
301.4	37.4508	301.5	53.6192	302.5	32.1329	300.7	37.3936	300.2	19.9997	299	36.037
301.5	36.7498	301.6	53.9053	302.6	32.3904	300.8	36.7951	300.3	19.4359	299.1	36.8846
301.6	36.8547	301.7	54.0197	302.7	33.3285	301	35.9511	300.4	20.4241	299.2	36.7868
301.8	37.2958	301.8	54.0745	302.8	32.4357	301.1	34.7865	300.5	20.0427	299.3	37.0038
301.9	36.9608	302	54.8291	303	32.5024	301.2	34.9879	300.6	20.7651	299.5	37.5509
302	37.0503	302.1	54.6241	303.1	33.5121	301.3	34.7734	300.8	21.1442	299.6	37.2803
302.1	36.1538	302.2	55.368	303.2	33.6301	301.4	36.1371	300.9	21.41	299.7	37.8132
302.2	35.8045	302.3	55.4502	303.3	34.0474	301.5	36.1526	301	22.1276	299.8	37.8764
302.3	35.7497	302.4	55.9056	303.4	34.2214	301.7	36.0668	301.1	21.8475	299.9	38.9969
302.4	35.3313	302.5	56.6697	303.5	35.3468	301.8	36.2682	301.2	22.2528	300	37.8585
302.5	35.1882	302.6	57.1072	303.6	34.2906	301.9	39.2091	301.3	22.1038	300.1	38.8598
302.7	35.7401	302.8	56.4158	303.7	34.6732	302	38.1374	301.4	23.402	300.1	38.3723
302.8	34.7519	302.9	57.2503	303.8	34.6148	302.1	39.3856	301.6	23.7858	300.2	40.0043
302.9	35.5172	303	57.2836	304	34.0903	302.2	39.5322	301.7	23.3305	300.4	39.3856
303	36.1788	303.1	58.378	304.1	34.3001	302.3	40.4155	301.8	23.8347	300.5	39.4344
303.1	36.3195	303.2	57.7068	304.1	34.4849	302.4	39.7337	301.9	23.551	300.6	39.0244
303.2	36.242	303.3	57.3278	304.2	34.0092	302.6	41.2715	302	24.3223	300.7	38.1064
303.3	37.1909	303.4	57.95	304.3	33.4537	302.7	40.9293	302.1	23.6464	300.8	37.0145
303.4	37.0407	303.6	57.9441	304.4	33.9556	302.8	41.0032	302.2	23.9182	300.9	38.3437
303.6	37.1158	303.7	56.5064	304.5	34.2965	302.9	40.8399	302.3	23.725	301	38.1863
303.7	37.2469	303.8	57.6508	304.6	34.3847	303	40.108	302.4	23.7334	301.1	37.8001
303.8	37.5831	303.9	57.2157	304.8	35.2323	303.1	39.7313	302.6	23.1683	301.3	37.2601
303.9	37.0145	304	57.9512	304.9	35.7246	303.2	39.9804	302.7	23.5927	301.4	37.4174
304	37.4246	304.1	58.4555	305	36.3922	303.4	37.8919	302.8	23.7751	301.5	36.4876
304.1	36.7022	304.2	57.7831	305.1	35.615	303.5	37.9229	302.9	24.1506	301.6	37.1838
304.1	36.6008	304.3	58.6236	305.2	36.4006	303.6	38.8706	303	24.0529	301.7	36.4101
304.2	37.4365	304.4	58.9454	305.3	36.9811	303.7	37.1563	303.1	23.1564	301.8	36.9978
304.3	37.3149	304.5	59.8168	305.4	36.2849	303.8	38.3294	303.2	24.7824	301.9	37.1647
304.5	37.6952	304.6	59.5725	305.5	36.7689	303.9	36.782	303.3	24.8826	302	36.8786
304.6	37.8096	304.7	58.2552	305.7	37.6284	304	37.5116	303.5	25.0387	302.1	38.3687
304.7	37.0026	304.8	59.4056	305.8	36.0131	304.1	39.1936	303.6	24.7932	302.2	37.8263
304.8	38.203	305	60.0112	305.9	37.1122	304.2	40.2319	303.7	23.8037	302.4	38.4975
304.9	39.0315	305.1	59.2935	306	36.4947	304.3	40.9174	303.8	25.0423	302.5	37.1814
305	38.681	305.2	60.0934	306.1	36.9573	304.4	40.22	303.9	24.7037	302.6	39.1519
305.1	38.8408	305.3	60.283	306.2	36.8524	304.5	40.8661	304	24.7479	302.7	39.7515
305.2	39.5095	305.4	60.9601	306.3	35.9142	304.6	42.7496	304.1	24.55	302.8	37.9038
305.3	40.6683	305.5	61.0328	306.4	36.484	304.8	42.7544	304.1	23.5581	302.9	40.3237
305.5	39.9268	305.6	62.5801	306.6	36.0477	304.9	43.3087	304.3	25.3534	303	39.6335
305.6	41.1654	305.8	62.8853	306.7	35.3885	305	43.5686	304.4	24.7204	303.2	39.8994
305.7	40.5192	305.9	62.3834	306.8	34.9748	305.1	42.8939	304.5	25.1567	303.3	39.9172
305.8	41.1713	306	63.5541	306.9	34.9176	305.2	42.2478	304.6	25.4095	303.4	39.3736
305.9	41.3787	306.1	63.4432	307	33.9627	305.3	41.548	304.7	25.6979	303.5	39.7337
306	41.5337	306.2	63.653	307.1	33.6695	305.4	42.0713	304.8	25.686	303.6	40.3845
306.1	41.3334	306.3	64.4827	307.3	34.0247	305.5	41.8294	304.9	25.9948	303.7	38.8789
306.3	42.0892	306.4	64.7366	307.4	34.6351	305.7	41.1749	305	26.1641	303.9	39.1471
306.3	42.0952	306.5	63.4527	307.5	34.38	305.8	42.1798	305.2	25.6264	303.9	38.4724
306.5	42.2585	306.7	64.9119	307.6	34.8306	305.9	43.2754	305.3	26.8352	304.1	38.0111
306.6	42.1786	306.8	65.0811	307.7	34.7841	306	43.2265	305.4	27.1344	304.1	37.9849
306.7	42.2502	306.9	63.6005	307.8	36.3827	306.1	44.3423	305.5	28.0428	304.2	37.2875
306.8	41.9617	307	65.608	307.9	36.3171	306.2	44.0121	305.6	27.8449	304.3	37.5509
306.9	42.3622	307.1	65.8155	308	36.6175	306.3	45.0468	305.7	28.1429	304.4	36.8416
307	43.1263	307.2	65.3303	308.1	36.521	306.5	45.6584	305.9	28.218	304.5	36.1764
307.2	43.5984	307.3	66.7703	308.2	36.1753	306.5	46.32	306	28.28	304.6	36.0966
307.3	42.9857	307.5	66.2124	308.3	37.7631	306.7	47.7147	306.1	28.5077	304.7	36.3112
307.4	43.1037	307.6	67.0993	308.4	37.3983	306.8	47.3094	306.2	29.0477	304.9	34.7972
307.5	43.5472	307.7	67.2436	308.5	36.9036	306.9	48.1558	306.3	28.7604	305	35.7318
307.6	43.5054	307.8	67.5225	308.6	37.7274	307	48.7661	306.4	27.8652	305.1	37.3936
307.7	43.6783	307.9	69.0925	308.7	37.0133	307.1	48.4693	306.5	28.7628	305.2	38.0302
307.8	43.6199	308	68.8982	308.8	38.0325	307.2	49.0904	306.7	28.7259	305.3	38.4545
307.9	43.1418	308.1	69.2773	309	37.8835	307.3	49.0475	306.8	28.2753	305.4	37.8704
308	42.6555	308.1	70.25	309.1	37.8716	307.5	49.9928	306.9	28.6424	305.5	38.209
308.1	43.7689	308.3	70.0748	309.2	38.7061	307.6	50.1072	307	28.6973	305.6	39.6073
308.2	42.4337	308.4	70.616	309.3	38.234	307.7	50.0763	307.1	28.8355	305.7	40.8697
308.3	42.659	308.5	70.2489	309.4	39.4285	307.8	51.4221	307.2	28.3778	305.8	40.4608
308.4	42.3002	308.6	70.4324	309.5	39.8588	307.9	54.4953	307.3	28.6365	306	41.0581
308.5	42.541	308.7	70.9558	309.6	39.978	308	54.9913	307.4	28.5614	306.1	40.8161
308.7	42.5673	308.8	69.9401	309.7	39.3546	308.1	56.3192	307.5	29.3136	306.2	41.517
308.7	42.1047	308.9	70.56	309.9	39.531	308.1	57.1966	307.6	29.1359	306.3	40.8423
308.9	42.5649	309.1	71.0905	310	38.8336	308.3	58.651	307.8	28.5482	306.4	42.5899
309	42.9714	309.2	69.6933	310.1	39.2366	308.4	59.6535	307.9	28.5387	306.5	42.088
[truncated: 6,989 more rows]

## Sheet: Figure1b
Figure 1. a H2-TPR profile for Ni,Fe monometallic and bimetallic catalysts supported on MgO and b their PXRD patterns after isothermal reduction of 450 C.
Ni_MgO			Fe_MgO			50Fe50Ni_MgO			33Fe66Ni_MgO			17Fe83Ni_MgO			66Fe33Ni_MgO
2theta	counts	normanlized counts	2theta	counts	normanlized counts	2theta	counts	normanlized counts	2theta	counts	normanlized counts	2theta	counts	normanlized counts	2theta	counts	normanlized counts
2	2715	0.19035	2	2527	0.17481	2	2134	0.21072	2	1859	0.21427	2	1617	0.08789	2	2627	0.21024
2.015	2645	0.18544	2.015	2469	0.17079	2.015	2158	0.21309	2.015	1831	0.21104	2.015	1635	0.08886	2.015	2462	0.19704
2.03	2622	0.18383	2.03	2576	0.1782	2.03	2110	0.20835	2.03	1824	0.21024	2.03	1689	0.0918	2.03	2546	0.20376
2.045	2499	0.17521	2.045	2598	0.17972	2.045	2134	0.21072	2.045	1779	0.20505	2.045	1605	0.08723	2.045	2430	0.19448
2.06	2531	0.17745	2.06	2376	0.16436	2.06	2048	0.20223	2.06	1749	0.20159	2.06	1548	0.08414	2.06	2352	0.18824
2.075	2463	0.17268	2.075	2321	0.16056	2.075	1989	0.19641	2.075	1691	0.19491	2.075	1512	0.08218	2.075	2389	0.1912
2.09	2450	0.17177	2.09	2312	0.15993	2.09	1976	0.19512	2.09	1719	0.19813	2.09	1545	0.08397	2.09	2402	0.19224
2.105	2443	0.17128	2.105	2338	0.16173	2.105	2000	0.19749	2.105	1772	0.20424	2.105	1600	0.08696	2.105	2326	0.18615
2.12	2410	0.16897	2.12	2231	0.15433	2.12	1969	0.19443	2.12	1703	0.19629	2.12	1471	0.07995	2.12	2256	0.18055
2.135	2284	0.16013	2.135	2119	0.14658	2.135	1968	0.19433	2.135	1661	0.19145	2.135	1457	0.07919	2.135	2190	0.17527
2.15	2326	0.16308	2.15	2175	0.15046	2.15	1954	0.19295	2.15	1691	0.19491	2.15	1465	0.07962	2.15	2176	0.17415
2.165	2262	0.15859	2.165	2165	0.14976	2.165	1894	0.18702	2.165	1610	0.18557	2.165	1504	0.08174	2.165	2236	0.17895
2.18	2295	0.16091	2.18	2088	0.14444	2.18	1879	0.18554	2.18	1616	0.18626	2.18	1437	0.0781	2.18	2141	0.17135
2.195	2182	0.15298	2.195	2142	0.14817	2.195	1833	0.181	2.195	1630	0.18787	2.195	1360	0.07392	2.195	2125	0.17007
2.21	2183	0.15305	2.21	2116	0.14638	2.21	1799	0.17764	2.21	1584	0.18257	2.21	1376	0.07479	2.21	2100	0.16807
2.225	2135	0.14969	2.225	1982	0.13711	2.225	1804	0.17814	2.225	1598	0.18419	2.225	1379	0.07495	2.225	1967	0.15742
2.24	2132	0.14948	2.24	1996	0.13807	2.24	1766	0.17439	2.24	1562	0.18004	2.24	1390	0.07555	2.24	1967	0.15742
2.255	2065	0.14478	2.255	1970	0.13628	2.255	1809	0.17863	2.255	1508	0.17381	2.255	1336	0.07261	2.255	1861	0.14894
2.27	2095	0.14688	2.27	1945	0.13455	2.27	1705	0.16836	2.27	1481	0.1707	2.27	1316	0.07153	2.27	1948	0.1559
2.285	2042	0.14317	2.285	1928	0.13337	2.285	1679	0.16579	2.285	1452	0.16736	2.285	1304	0.07087	2.285	1970	0.15766
2.3	1960	0.13742	2.3	1907	0.13192	2.3	1709	0.16876	2.3	1389	0.1601	2.3	1295	0.07038	2.3	1940	0.15526
2.315	1852	0.12985	2.315	1909	0.13206	2.315	1657	0.16362	2.315	1428	0.16459	2.315	1267	0.06886	2.315	1913	0.1531
2.33	1905	0.13356	2.33	1902	0.13157	2.33	1648	0.16273	2.33	1409	0.1624	2.33	1319	0.07169	2.33	1865	0.14926
2.345	1896	0.13293	2.345	1784	0.12341	2.345	1613	0.15928	2.345	1475	0.17001	2.345	1317	0.07158	2.345	1871	0.14974
2.36	1937	0.13581	2.36	1774	0.12272	2.36	1654	0.16333	2.36	1438	0.16574	2.36	1258	0.06837	2.36	1755	0.14046
2.375	1876	0.13153	2.375	1759	0.12168	2.375	1636	0.16155	2.375	1445	0.16655	2.375	1315	0.07147	2.375	1800	0.14406
2.39	1892	0.13265	2.39	1762	0.12189	2.39	1642	0.16214	2.39	1396	0.1609	2.39	1267	0.06886	2.39	1831	0.14654
2.405	1840	0.12901	2.405	1733	0.11988	2.405	1658	0.16372	2.405	1416	0.16321	2.405	1197	0.06506	2.405	1787	0.14302
2.42	1844	0.12929	2.42	1792	0.12396	2.42	1556	0.15365	2.42	1364	0.15722	2.42	1215	0.06604	2.42	1718	0.13749
2.435	1796	0.12592	2.435	1688	0.11677	2.435	1544	0.15246	2.435	1382	0.15929	2.435	1207	0.0656	2.435	1769	0.14158
2.45	1810	0.1269	2.45	1597	0.11047	2.45	1500	0.14812	2.45	1371	0.15802	2.45	1226	0.06663	2.45	1691	0.13533
2.465	1816	0.12732	2.465	1657	0.11462	2.465	1519	0.15	2.465	1349	0.15549	2.465	1188	0.06457	2.465	1710	0.13685
2.48	1811	0.12697	2.48	1599	0.11061	2.48	1500	0.14812	2.48	1360	0.15675	2.48	1167	0.06343	2.48	1682	0.13461
2.495	1735	0.12164	2.495	1585	0.10964	2.495	1471	0.14526	2.495	1345	0.15503	2.495	1197	0.06506	2.495	1658	0.13269
2.51	1640	0.11498	2.51	1638	0.11331	2.51	1494	0.14753	2.51	1285	0.14811	2.51	1199	0.06517	2.51	1667	0.13341
2.525	1683	0.118	2.525	1600	0.11068	2.525	1462	0.14437	2.525	1314	0.15145	2.525	1174	0.06381	2.525	1616	0.12933
2.54	1624	0.11386	2.54	1568	0.10847	2.54	1425	0.14071	2.54	1322	0.15237	2.54	1193	0.06484	2.54	1612	0.12901
2.555	1655	0.11603	2.555	1565	0.10826	2.555	1427	0.14091	2.555	1324	0.1526	2.555	1162	0.06316	2.555	1673	0.13389
2.57	1646	0.1154	2.57	1511	0.10452	2.57	1419	0.14012	2.57	1313	0.15134	2.57	1152	0.06261	2.57	1576	0.12613
2.585	1640	0.11498	2.585	1517	0.10494	2.585	1402	0.13844	2.585	1278	0.1473	2.585	1111	0.06038	2.585	1588	0.12709
2.6	1639	0.11491	2.6	1554	0.1075	2.6	1399	0.13815	2.6	1244	0.14338	2.6	1137	0.0618	2.6	1551	0.12413
2.615	1598	0.11204	2.615	1494	0.10335	2.615	1436	0.1418	2.615	1235	0.14235	2.615	1122	0.06098	2.615	1529	0.12237
2.63	1589	0.11141	2.63	1536	0.10625	2.63	1442	0.14239	2.63	1248	0.14385	2.63	1166	0.06337	2.63	1556	0.12453
2.645	1555	0.10902	2.645	1543	0.10674	2.645	1419	0.14012	2.645	1302	0.15007	2.645	1110	0.06033	2.645	1524	0.12197
2.66	1529	0.1072	2.66	1516	0.10487	2.66	1366	0.13489	2.66	1254	0.14454	2.66	1122	0.06098	2.66	1456	0.11653
2.675	1536	0.10769	2.675	1536	0.10625	2.675	1376	0.13587	2.675	1235	0.14235	2.675	1138	0.06185	2.675	1485	0.11885
2.69	1572	0.11022	2.69	1511	0.10452	2.69	1399	0.13815	2.69	1203	0.13866	2.69	1121	0.06093	2.69	1483	0.11869
2.705	1585	0.11113	2.705	1431	0.09899	2.705	1396	0.13785	2.705	1186	0.1367	2.705	1106	0.06011	2.705	1482	0.11861
2.72	1491	0.10454	2.72	1386	0.09588	2.72	1329	0.13123	2.72	1275	0.14696	2.72	1078	0.05859	2.72	1497	0.11981
2.735	1518	0.10643	2.735	1407	0.09733	2.735	1329	0.13123	2.735	1294	0.14915	2.735	1138	0.06185	2.735	1448	0.11589
2.75	1477	0.10355	2.75	1431	0.09899	2.75	1269	0.12531	2.75	1239	0.14281	2.75	1089	0.05919	2.75	1434	0.11477
2.765	1409	0.09879	2.765	1383	0.09567	2.765	1355	0.1338	2.765	1203	0.13866	2.765	1099	0.05973	2.765	1458	0.11669
2.78	1480	0.10376	2.78	1367	0.09456	2.78	1320	0.13034	2.78	1220	0.14062	2.78	1119	0.06082	2.78	1432	0.11461
2.795	1518	0.10643	2.795	1390	0.09615	2.795	1308	0.12916	2.795	1204	0.13877	2.795	1067	0.05799	2.795	1421	0.11373
2.81	1508	0.10573	2.81	1413	0.09774	2.81	1280	0.12639	2.81	1231	0.14189	2.81	1062	0.05772	2.81	1430	0.11445
2.825	1434	0.10054	2.825	1385	0.09581	2.825	1279	0.1263	2.825	1272	0.14661	2.825	1076	0.05848	2.825	1339	0.10716
2.84	1382	0.09689	2.84	1380	0.09546	2.84	1244	0.12284	2.84	1225	0.14119	2.84	1035	0.05625	2.84	1373	0.10988
2.855	1398	0.09802	2.855	1434	0.0992	2.855	1287	0.12709	2.855	1258	0.145	2.855	1074	0.05837	2.855	1355	0.10844
2.87	1487	0.10426	2.87	1396	0.09657	2.87	1324	0.13074	2.87	1140	0.1314	2.87	1038	0.05642	2.87	1361	0.10892
2.885	1408	0.09872	2.885	1399	0.09678	2.885	1373	0.13558	2.885	1207	0.13912	2.885	1050	0.05707	2.885	1371	0.10972
2.9	1413	0.09907	2.9	1311	0.09069	2.9	1304	0.12876	2.9	1187	0.13681	2.9	1058	0.0575	2.9	1381	0.11052
2.915	1431	0.10033	2.915	1309	0.09055	2.915	1256	0.12402	2.915	1262	0.14546	2.915	1073	0.05832	2.915	1353	0.10828
2.93	1418	0.09942	2.93	1355	0.09373	2.93	1309	0.12926	2.93	1214	0.13993	2.93	1048	0.05696	2.93	1330	0.10644
2.945	1353	0.09486	2.945	1311	0.09069	2.945	1282	0.12659	2.945	1212	0.1397	2.945	1002	0.05446	2.945	1309	0.10476
2.96	1327	0.09304	2.96	1271	0.08792	2.96	1277	0.1261	2.96	1188	0.13693	2.96	1026	0.05576	2.96	1336	0.10692
2.975	1339	0.09388	2.975	1322	0.09145	2.975	1238	0.12225	2.975	1202	0.13854	2.975	1022	0.05555	2.975	1346	0.10772
2.99	1323	0.09276	2.99	1296	0.08965	2.99	1264	0.12481	2.99	1204	0.13877	2.99	982	0.05337	2.99	1308	0.10468
3.005	1314	0.09213	3.005	1284	0.08882	3.005	1241	0.12254	3.005	1130	0.13024	3.005	1012	0.055	3.005	1310	0.10484
3.02	1290	0.09044	3.02	1264	0.08744	3.02	1204	0.11889	3.02	1098	0.12656	3.02	973	0.05288	3.02	1254	0.10036
3.035	1276	0.08946	3.035	1251	0.08654	3.035	1238	0.12225	3.035	1172	0.13509	3.035	1016	0.05522	3.035	1323	0.10588
3.05	1293	0.09065	3.05	1228	0.08495	3.05	1149	0.11346	3.05	1097	0.12644	3.05	1016	0.05522	3.05	1292	0.1034
3.065	1297	0.09093	3.065	1122	0.07761	3.065	1213	0.11978	3.065	1126	0.12978	3.065	974	0.05294	3.065	1248	0.09988
3.08	1289	0.09037	3.08	1183	0.08183	3.08	1242	0.12264	3.08	1149	0.13243	3.08	955	0.0519	3.08	1237	0.099
3.095	1289	0.09037	3.095	1205	0.08336	3.095	1196	0.1181	3.095	1143	0.13174	3.095	960	0.05218	3.095	1234	0.09876
3.11	1332	0.09339	3.11	1163	0.08045	3.11	1174	0.11593	3.11	1160	0.1337	3.11	957	0.05201	3.11	1282	0.1026
3.125	1363	0.09556	3.125	1207	0.08349	3.125	1193	0.1178	3.125	1083	0.12483	3.125	956	0.05196	3.125	1262	0.101
3.14	1329	0.09318	3.14	1208	0.08356	3.14	1174	0.11593	3.14	1106	0.12748	3.14	1014	0.05511	3.14	1172	0.0938
3.155	1281	0.08981	3.155	1196	0.08273	3.155	1130	0.11158	3.155	1140	0.1314	3.155	965	0.05245	3.155	1222	0.0978
3.17	1304	0.09143	3.17	1197	0.0828	3.17	1114	0.11	3.17	1125	0.12967	3.17	952	0.05174	3.17	1234	0.09876
3.185	1273	0.08925	3.185	1200	0.08301	3.185	1155	0.11405	3.185	1155	0.13313	3.185	978	0.05316	3.185	1244	0.09956
3.2	1303	0.09136	3.2	1220	0.08439	3.2	1222	0.12067	3.2	1141	0.13151	3.2	942	0.0512	3.2	1250	0.10004
3.215	1216	0.08526	3.215	1191	0.08239	3.215	1188	0.11731	3.215	1064	0.12264	3.215	915	0.04973	3.215	1194	0.09556
3.23	1238	0.0868	3.23	1235	0.08543	3.23	1161	0.11464	3.23	1080	0.12448	3.23	964	0.05239	3.23	1191	0.09532
3.245	1230	0.08624	3.245	1159	0.08017	3.245	1205	0.11899	3.245	1110	0.12794	3.245	982	0.05337	3.245	1155	0.09244
3.26	1228	0.0861	3.26	1140	0.07886	3.26	1199	0.1184	3.26	1088	0.1254	3.26	953	0.0518	3.26	1221	0.09772
3.275	1267	0.08883	3.275	1134	0.07844	3.275	1152	0.11376	3.275	1065	0.12275	3.275	939	0.05104	3.275	1178	0.09428
3.29	1262	0.08848	3.29	1162	0.08038	3.29	1133	0.11188	3.29	1064	0.12264	3.29	874	0.0475	3.29	1165	0.09324
3.305	1271	0.08911	3.305	1199	0.08294	3.305	1146	0.11316	3.305	1138	0.13117	3.305	922	0.05011	3.305	1202	0.0962
3.32	1265	0.08869	3.32	1139	0.07879	3.32	1120	0.1106	3.32	1119	0.12898	3.32	915	0.04973	3.32	1161	0.09292
3.335	1198	0.08399	3.335	1163	0.08045	3.335	1117	0.1103	3.335	1101	0.1269	3.335	876	0.04761	3.335	1126	0.09012
3.35	1173	0.08224	3.35	1135	0.07851	3.35	1157	0.11425	3.35	1123	0.12944	3.35	948	0.05152	3.35	1148	0.09188
3.365	1237	0.08673	3.365	1152	0.07969	3.365	1147	0.11326	3.365	1105	0.12736	3.365	931	0.0506	3.365	1157	0.0926
3.38	1199	0.08406	3.38	1114	0.07706	3.38	1149	0.11346	3.38	1155	0.13313	3.38	956	0.05196	3.38	1178	0.09428
3.395	1224	0.08582	3.395	1128	0.07803	3.395	1118	0.1104	3.395	1150	0.13255	3.395	950	0.05163	3.395	1126	0.09012
3.41	1186	0.08315	3.41	1123	0.07768	3.41	1060	0.10467	3.41	1117	0.12875	3.41	959	0.05212	3.41	1122	0.0898
3.425	1164	0.08161	3.425	1126	0.07789	3.425	1094	0.10803	3.425	1095	0.12621	3.425	973	0.05288	3.425	1150	0.09204
3.44	1177	0.08252	3.44	1075	0.07436	3.44	1073	0.10595	3.44	1138	0.13117	3.44	920	0.05	3.44	1215	0.09724
3.455	1174	0.08231	3.455	1128	0.07803	3.455	1107	0.10931	3.455	1109	0.12782	3.455	939	0.05104	3.455	1149	0.09196
3.47	1224	0.08582	3.47	1090	0.0754	3.47	1065	0.10516	3.47	1125	0.12967	3.47	933	0.05071	3.47	1172	0.0938
3.485	1176	0.08245	3.485	1112	0.07692	3.485	1053	0.10398	3.485	1106	0.12748	3.485	904	0.04913	3.485	1134	0.09076
3.5	1144	0.08021	3.5	1101	0.07616	3.5	1118	0.1104	3.5	1107	0.12759	3.5	934	0.05076	3.5	1107	0.0886
3.515	1136	0.07965	3.515	1060	0.07333	3.515	1171	0.11563	3.515	1126	0.12978	3.515	904	0.04913	3.515	1113	0.08908
3.53	1127	0.07902	3.53	1156	0.07997	3.53	1158	0.11435	3.53	1109	0.12782	3.53	937	0.05093	3.53	1142	0.0914
3.545	1171	0.0821	3.545	1151	0.07962	3.545	1155	0.11405	3.545	1052	0.12125	3.545	913	0.04962	3.545	1144	0.09156
3.56	1206	0.08455	3.56	1192	0.08246	3.56	1139	0.11247	3.56	1065	0.12275	3.56	892	0.04848	3.56	1102	0.0882
3.575	1161	0.0814	3.575	1107	0.07658	3.575	1127	0.11129	3.575	1051	0.12114	3.575	860	0.04674	3.575	1118	0.08948
3.59	1185	0.08308	3.59	1054	0.07291	3.59	1118	0.1104	3.59	1045	0.12045	3.59	853	0.04636	3.59	1126	0.09012
3.605	1214	0.08512	3.605	1116	0.0772	3.605	1090	0.10763	3.605	1079	0.12437	3.605	921	0.05006	3.605	1187	0.095
3.62	1146	0.08035	3.62	1109	0.07672	3.62	1138	0.11237	3.62	1102	0.12702	3.62	906	0.04924	3.62	1137	0.091
3.635	1182	0.08287	3.635	1124	0.07775	3.635	1192	0.11771	3.635	1117	0.12875	3.635	910	0.04946	3.635	1052	0.08419
3.65	1146	0.08035	3.65	1135	0.07851	3.65	1117	0.1103	3.65	1073	0.12367	3.65	883	0.04799	3.65	1109	0.08876
3.665	1149	0.08056	3.665	1075	0.07436	3.665	1055	0.10418	3.665	1108	0.12771	3.665	863	0.0469	3.665	1136	0.09092
3.68	1140	0.07993	3.68	1137	0.07865	3.68	1095	0.10813	3.68	1084	0.12494	3.68	916	0.04979	3.68	1115	0.08924
3.695	1122	0.07867	3.695	1077	0.0745	3.695	1083	0.10694	3.695	1010	0.11641	3.695	907	0.0493	3.695	1140	0.09124
3.71	1115	0.07817	3.71	1073	0.07423	3.71	1125	0.11109	3.71	1043	0.12022	3.71	909	0.0494	3.71	1139	0.09116
3.725	1123	0.07874	3.725	1079	0.07464	3.725	1138	0.11237	3.725	1050	0.12102	3.725	912	0.04957	3.725	1124	0.08996
3.74	1164	0.08161	3.74	1097	0.07589	3.74	1122	0.11079	3.74	1119	0.12898	3.74	894	0.04859	3.74	1150	0.09204
3.755	1221	0.08561	3.755	1088	0.07526	3.755	1102	0.10882	3.755	1074	0.12379	3.755	890	0.04837	3.755	1120	0.08964
3.77	1143	0.08014	3.77	1049	0.07257	3.77	1115	0.1101	3.77	1127	0.1299	3.77	930	0.05055	3.77	1165	0.09324
3.785	1163	0.08154	3.785	1070	0.07402	3.785	1139	0.11247	3.785	1058	0.12195	3.785	882	0.04794	3.785	1147	0.0918
3.8	1091	0.07649	3.8	1047	0.07243	3.8	1049	0.10358	3.8	1029	0.1186	3.8	880	0.04783	3.8	1142	0.0914
3.815	1137	0.07972	3.815	1083	0.07492	3.815	1123	0.11089	3.815	1137	0.13105	3.815	906	0.04924	3.815	1089	0.08715
3.83	1097	0.07691	3.83	1067	0.07381	3.83	1119	0.1105	3.83	1054	0.12148	3.83	874	0.0475	3.83	1104	0.08836
3.845	1119	0.07845	3.845	1055	0.07298	3.845	1106	0.10921	3.845	1104	0.12725	3.845	876	0.04761	3.845	1115	0.08924
3.86	1108	0.07768	3.86	1108	0.07665	3.86	1145	0.11306	3.86	1130	0.13024	3.86	881	0.04788	3.86	1091	0.08731
3.875	1148	0.08049	3.875	1129	0.0781	3.875	1092	0.10783	3.875	1084	0.12494	3.875	837	0.04549	3.875	1115	0.08924
3.89	1113	0.07803	3.89	1069	0.07395	3.89	1060	0.10467	3.89	1003	0.11561	3.89	847	0.04604	3.89	1086	0.08691
3.905	1129	0.07916	3.905	1051	0.0727	3.905	1087	0.10734	3.905	1071	0.12344	3.905	876	0.04761	3.905	1117	0.0894
3.92	1173	0.08224	3.92	1012	0.07001	3.92	1063	0.10497	3.92	1064	0.12264	3.92	827	0.04495	3.92	1095	0.08764
3.935	1196	0.08385	3.935	1013	0.07007	3.935	1072	0.10586	3.935	1028	0.11849	3.935	876	0.04761	3.935	1104	0.08836
3.95	1172	0.08217	3.95	1057	0.07312	3.95	1102	0.10882	3.95	1077	0.12414	3.95	863	0.0469	3.95	1123	0.08988
3.965	1107	0.07761	3.965	1073	0.07423	3.965	1089	0.10753	3.965	1097	0.12644	3.965	863	0.0469	3.965	1088	0.08707
3.98	1137	0.07972	3.98	1121	0.07755	3.98	1100	0.10862	3.98	1088	0.1254	3.98	898	0.04881	3.98	1093	0.08747
3.995	1102	0.07726	3.995	1089	0.07533	3.995	1085	0.10714	3.995	1075	0.12391	3.995	902	0.04902	3.995	1089	0.08715
4.01	1063	0.07453	4.01	1106	0.07651	4.01	1080	0.10665	4.01	1052	0.12125	4.01	834	0.04533	4.01	1084	0.08675
4.025	1108	0.07768	4.025	1087	0.07519	4.025	1062	0.10487	4.025	1035	0.11929	4.025	834	0.04533	4.025	1010	0.08083
4.04	1092	0.07656	4.04	1029	0.07118	4.04	1075	0.10615	4.04	1078	0.12425	4.04	894	0.04859	4.04	1056	0.08451
4.055	1084	0.076	4.055	1059	0.07326	4.055	1050	0.10368	4.055	1032	0.11895	4.055	835	0.04538	4.055	1053	0.08427
4.07	1087	0.07621	4.07	985	0.06814	4.07	1038	0.1025	4.07	1024	0.11803	4.07	818	0.04446	4.07	1060	0.08483
4.085	1037	0.07271	4.085	977	0.06758	4.085	1097	0.10832	4.085	1043	0.12022	4.085	849	0.04614	4.085	1072	0.08579
4.1	1105	0.07747	4.1	1038	0.0718	4.1	1086	0.10724	4.1	998	0.11503	4.1	851	0.04625	4.1	1034	0.08275
4.115	1105	0.07747	4.115	1072	0.07416	4.115	1068	0.10546	4.115	1009	0.1163	4.115	828	0.045	4.115	992	0.07939
4.13	1017	0.0713	4.13	967	0.06689	4.13	1021	0.10082	4.13	1033	0.11906	4.13	813	0.04419	4.13	1006	0.08051
4.145	1060	0.07432	4.145	1005	0.06952	4.145	1001	0.09884	4.145	1047	0.12068	4.145	802	0.04359	4.145	1055	0.08443
4.16	1116	0.07824	4.16	1007	0.06966	4.16	1068	0.10546	4.16	1018	0.11734	4.16	807	0.04386	4.16	1071	0.08571
4.175	1060	0.07432	4.175	993	0.06869	4.175	1078	0.10645	4.175	1029	0.1186	4.175	809	0.04397	4.175	1046	0.08371
4.19	1069	0.07495	4.19	1035	0.0716	4.19	1091	0.10773	4.19	1100	0.12679	4.19	816	0.04435	4.19	1047	0.08379
4.205	1026	0.07193	4.205	985	0.06814	4.205	1010	0.09973	4.205	1056	0.12172	4.205	810	0.04402	4.205	1017	0.08139
4.22	1068	0.07488	4.22	1035	0.0716	4.22	1007	0.09944	4.22	1062	0.12241	4.22	791	0.04299	4.22	986	0.07891
4.235	1036	0.07264	4.235	1022	0.0707	4.235	1037	0.1024	4.235	1026	0.11826	4.235	812	0.04413	4.235	1034	0.08275
4.25	1032	0.07236	4.25	1040	0.07194	4.25	1030	0.10171	4.25	1020	0.11757	4.25	853	0.04636	4.25	1058	0.08467
4.265	1038	0.07278	4.265	1038	0.0718	4.265	1020	0.10072	4.265	1067	0.12298	4.265	782	0.0425	4.265	1022	0.08179
4.28	1072	0.07516	4.28	980	0.06779	4.28	1030	0.10171	4.28	1040	0.11987	4.28	791	0.04299	4.28	1006	0.08051
4.295	1054	0.0739	4.295	1007	0.06966	4.295	1003	0.09904	4.295	983	0.1133	4.295	832	0.04522	4.295	1006	0.08051
4.31	1113	0.07803	4.31	984	0.06807	4.31	1012	0.09993	4.31	1007	0.11607	4.31	786	0.04272	4.31	1027	0.08219
4.325	1089	0.07635	4.325	1008	0.06973	4.325	1029	0.10161	4.325	1031	0.11883	4.325	844	0.04587	4.325	995	0.07963
4.34	1095	0.07677	4.34	972	0.06724	4.34	1032	0.10191	4.34	1078	0.12425	4.34	826	0.04489	4.34	1054	0.08435
4.355	1065	0.07467	4.355	959	0.06634	4.355	1074	0.10605	4.355	1063	0.12252	4.355	828	0.045	4.355	1000	0.08003
4.37	1047	0.07341	4.37	979	0.06772	4.37	1071	0.10576	4.37	1069	0.12321	4.37	817	0.0444	4.37	1055	0.08443
4.385	1037	0.07271	4.385	990	0.06848	4.385	1035	0.1022	4.385	1068	0.1231	4.385	864	0.04696	4.385	1032	0.08259
4.4	1075	0.07537	4.4	1000	0.06918	4.4	1040	0.1027	4.4	1091	0.12575	4.4	833	0.04527	4.4	1062	0.08499
4.415	1014	0.07109	4.415	1033	0.07146	4.415	1023	0.10102	4.415	1035	0.11929	4.415	853	0.04636	4.415	1039	0.08315
4.43	1070	0.07502	4.43	1040	0.07194	4.43	1004	0.09914	4.43	1078	0.12425	4.43	815	0.0443	4.43	1012	0.08099
4.445	1109	0.07775	4.445	1011	0.06994	4.445	1051	0.10378	4.445	1031	0.11883	4.445	808	0.04392	4.445	1037	0.08299
4.46	1040	0.07292	4.46	1006	0.06959	4.46	1046	0.10329	4.46	1049	0.12091	4.46	836	0.04544	4.46	978	0.07827
4.475	1034	0.0725	4.475	1010	0.06987	4.475	1004	0.09914	4.475	1084	0.12494	4.475	780	0.04239	4.475	1036	0.08291
4.49	1101	0.07719	4.49	973	0.06731	4.49	993	0.09805	4.49	1053	0.12137	4.49	774	0.04207	4.49	1054	0.08435
4.505	1096	0.07684	4.505	1030	0.07125	4.505	1034	0.1021	4.505	1068	0.1231	4.505	824	0.04479	4.505	1025	0.08203
4.52	1077	0.07551	4.52	1073	0.07423	4.52	1067	0.10536	4.52	1059	0.12206	4.52	830	0.04511	4.52	1005	0.08043
4.535	1076	0.07544	4.535	1011	0.06994	4.535	1071	0.10576	4.535	1025	0.11814	4.535	853	0.04636	4.535	1096	0.08772
4.55	1069	0.07495	4.55	950	0.06572	4.55	1061	0.10477	4.55	1002	0.11549	4.55	828	0.045	4.55	1034	0.08275
4.565	1042	0.07306	4.565	1071	0.07409	4.565	1047	0.10339	4.565	1048	0.12079	4.565	803	0.04364	4.565	1050	0.08403
4.58	1018	0.07137	4.58	979	0.06772	4.58	1030	0.10171	4.58	1091	0.12575	4.58	777	0.04223	4.58	1000	0.08003
4.595	1059	0.07425	4.595	1008	0.06973	4.595	1012	0.09993	4.595	1085	0.12506	4.595	778	0.04228	4.595	1000	0.08003
4.61	1060	0.07432	4.61	1018	0.07042	4.61	1056	0.10428	4.61	1091	0.12575	4.61	827	0.04495	4.61	1032	0.08259
4.625	1074	0.0753	4.625	1046	0.07236	4.625	1027	0.10141	4.625	1082	0.12471	4.625	858	0.04663	4.625	1043	0.08347
4.64	1079	0.07565	4.64	1072	0.07416	4.64	1048	0.10349	4.64	1084	0.12494	4.64	807	0.04386	4.64	1018	0.08147
4.655	1028	0.07207	4.655	996	0.0689	4.655	1005	0.09924	4.655	994	0.11457	4.655	867	0.04712	4.655	998	0.07987
4.67	1024	0.07179	4.67	993	0.06869	4.67	1057	0.10437	4.67	1068	0.1231	4.67	820	0.04457	4.67	974	0.07795
4.685	1024	0.07179	4.685	983	0.068	4.685	1052	0.10388	4.685	1022	0.1178	4.685	812	0.04413	4.685	949	0.07595
4.7	1064	0.0746	4.7	985	0.06814	4.7	1059	0.10457	4.7	1066	0.12287	4.7	817	0.0444	4.7	1043	0.08347
4.715	1045	0.07327	4.715	1000	0.06918	4.715	1047	0.10339	4.715	1077	0.12414	4.715	838	0.04555	4.715	1095	0.08764
4.73	1065	0.07467	4.73	983	0.068	4.73	1038	0.1025	4.73	1053	0.12137	4.73	859	0.04669	4.73	1026	0.08211
4.745	1060	0.07432	4.745	992	0.06862	4.745	1006	0.09934	4.745	1040	0.11987	4.745	869	0.04723	4.745	1007	0.08059
4.76	1024	0.07179	4.76	1010	0.06987	4.76	1054	0.10408	4.76	1087	0.12529	4.76	858	0.04663	4.76	989	0.07915
4.775	1069	0.07495	4.775	989	0.06841	4.775	1056	0.10428	4.775	1065	0.12275	4.775	810	0.04402	4.775	1007	0.08059
4.79	1095	0.07677	4.79	1036	0.07167	4.79	1035	0.1022	4.79	1104	0.12725	4.79	790	0.04294	4.79	1014	0.08115
4.805	1027	0.072	4.805	994	0.06876	4.805	1071	0.10576	4.805	1144	0.13186	4.805	786	0.04272	4.805	998	0.07987
4.82	1093	0.07663	4.82	947	0.06551	4.82	1067	0.10536	4.82	1064	0.12264	4.82	820	0.04457	4.82	1006	0.08051
4.835	1046	0.07334	4.835	983	0.068	4.835	1022	0.10092	4.835	1032	0.11895	4.835	798	0.04337	4.835	1036	0.08291
4.85	991	0.06948	4.85	984	0.06807	4.85	1063	0.10497	4.85	1037	0.11953	4.85	799	0.04343	4.85	1000	0.08003
4.865	1070	0.07502	4.865	1011	0.06994	4.865	1069	0.10556	4.865	1094	0.12609	4.865	823	0.04473	4.865	1009	0.08075
4.88	1070	0.07502	4.88	944	0.0653	4.88	1037	0.1024	4.88	1114	0.1284	4.88	820	0.04457	4.88	982	0.07859
4.895	1055	0.07397	4.895	944	0.0653	4.895	1060	0.10467	4.895	1046	0.12056	4.895	800	0.04348	4.895	995	0.07963
4.91	1022	0.07165	4.91	948	0.06558	4.91	1027	0.10141	4.91	1054	0.12148	4.91	865	0.04701	4.91	1004	0.08035
4.925	1024	0.07179	4.925	1042	0.07208	4.925	1030	0.10171	4.925	1039	0.11976	4.925	855	0.04647	4.925	1012	0.08099
4.94	1065	0.07467	4.94	986	0.06821	4.94	1003	0.09904	4.94	1058	0.12195	4.94	831	0.04517	4.94	1011	0.08091
4.955	1056	0.07404	4.955	937	0.06482	4.955	1045	0.10319	4.955	1040	0.11987	4.955	780	0.04239	4.955	1038	0.08307
4.97	1104	0.0774	4.97	964	0.06669	4.97	1056	0.10428	4.97	1116	0.12863	4.97	839	0.0456	4.97	1034	0.08275
4.985	1047	0.07341	4.985	977	0.06758	4.985	1062	0.10487	4.985	1122	0.12932	4.985	811	0.04408	4.985	992	0.07939
5	1078	0.07558	5	987	0.06828	5	994	0.09815	5	1079	0.12437	5	807	0.04386	5	993	0.07947
5.015	1033	0.07243	5.015	984	0.06807	5.015	964	0.09519	5.015	999	0.11515	5.015	810	0.04402	5.015	982	0.07859
5.03	1008	0.07067	5.03	968	0.06696	5.03	1010	0.09973	5.03	1072	0.12356	5.03	800	0.04348	5.03	1010	0.08083
5.045	1001	0.07018	5.045	954	0.06599	5.045	1041	0.10279	5.045	1064	0.12264	5.045	808	0.04392	5.045	982	0.07859
5.06	1013	0.07102	5.06	954	0.06599	5.06	1024	0.10112	5.06	1062	0.12241	5.06	804	0.0437	5.06	962	0.07699
5.075	1062	0.07446	5.075	987	0.06828	5.075	987	0.09746	5.075	1012	0.11664	5.075	791	0.04299	5.075	990	0.07923
5.09	993	0.06962	5.09	987	0.06828	5.09	1038	0.1025	5.09	1094	0.12609	5.09	786	0.04272	5.09	996	0.07971
5.105	989	0.06934	5.105	972	0.06724	5.105	1010	0.09973	5.105	1099	0.12667	5.105	780	0.04239	5.105	957	0.07659
5.12	957	0.0671	5.12	952	0.06586	5.12	1002	0.09894	5.12	1064	0.12264	5.12	790	0.04294	5.12	993	0.07947
5.135	975	0.06836	5.135	986	0.06821	5.135	1014	0.10013	5.135	1051	0.12114	5.135	769	0.0418	5.135	1025	0.08203
5.15	1012	0.07095	5.15	995	0.06883	5.15	1006	0.09934	5.15	1030	0.11872	5.15	774	0.04207	5.15	975	0.07803
5.165	1004	0.07039	5.165	948	0.06558	5.165	1000	0.09875	5.165	1111	0.12805	5.165	776	0.04218	5.165	973	0.07787
5.18	1058	0.07418	5.18	949	0.06565	5.18	1039	0.1026	5.18	1061	0.12229	5.18	758	0.0412	5.18	970	0.07763
5.195	1014	0.07109	5.195	949	0.06565	5.195	1004	0.09914	5.195	1023	0.11791	5.195	817	0.0444	5.195	953	0.07627
5.21	1003	0.07032	5.21	971	0.06717	5.21	1035	0.1022	5.21	1045	0.12045	5.21	792	0.04305	5.21	947	0.07579
5.225	1042	0.07306	5.225	934	0.06461	5.225	1021	0.10082	5.225	1047	0.12068	5.225	774	0.04207	5.225	1019	0.08155
5.24	1058	0.07418	5.24	970	0.0671	5.24	1032	0.10191	5.24	1053	0.12137	5.24	775	0.04212	5.24	929	0.07435
5.255	1048	0.07348	5.255	914	0.06323	5.255	1042	0.10289	5.255	1083	0.12483	5.255	802	0.04359	5.255	960	0.07683
5.27	986	0.06913	5.27	984	0.06807	5.27	1026	0.10131	5.27	1048	0.12079	5.27	752	0.04087	5.27	975	0.07803
5.285	973	0.06822	5.285	1000	0.06918	5.285	1019	0.10062	5.285	1132	0.13047	5.285	720	0.03913	5.285	962	0.07699
5.3	1048	0.07348	5.3	961	0.06648	5.3	981	0.09687	5.3	1038	0.11964	5.3	725	0.0394	5.3	962	0.07699
5.315	1044	0.0732	5.315	984	0.06807	5.315	1003	0.09904	5.315	1016	0.1171	5.315	762	0.04142	5.315	939	0.07515
5.33	1030	0.07221	5.33	926	0.06406	5.33	1025	0.10121	5.33	1029	0.1186	5.33	770	0.04185	5.33	944	0.07555
5.345	1033	0.07243	5.345	954	0.06599	5.345	1056	0.10428	5.345	1067	0.12298	5.345	799	0.04343	5.345	983	0.07867
5.36	1000	0.07011	5.36	977	0.06758	5.36	1022	0.10092	5.36	1067	0.12298	5.36	800	0.04348	5.36	939	0.07515
5.375	968	0.06787	5.375	982	0.06793	5.375	1004	0.09914	5.375	1061	0.12229	5.375	799	0.04343	5.375	958	0.07667
5.39	1003	0.07032	5.39	957	0.0662	5.39	958	0.0946	5.39	1084	0.12494	5.39	824	0.04479	5.39	952	0.07619
5.405	997	0.0699	5.405	991	0.06855	5.405	1052	0.10388	5.405	1038	0.11964	5.405	801	0.04353	5.405	965	0.07723
5.42	990	0.06941	5.42	982	0.06793	5.42	1036	0.1023	5.42	1051	0.12114	5.42	782	0.0425	5.42	997	0.07979
5.435	945	0.06626	5.435	951	0.06579	5.435	997	0.09845	5.435	1047	0.12068	5.435	830	0.04511	5.435	981	0.07851
5.45	1032	0.07236	5.45	989	0.06841	5.45	1045	0.10319	5.45	1053	0.12137	5.45	832	0.04522	5.45	965	0.07723
5.465	969	0.06794	5.465	957	0.0662	5.465	985	0.09726	5.465	1059	0.12206	5.465	828	0.045	5.465	965	0.07723
5.48	1050	0.07362	5.48	943	0.06523	5.48	1069	0.10556	5.48	1068	0.1231	5.48	772	0.04196	5.48	1018	0.08147
5.495	1047	0.07341	5.495	984	0.06807	5.495	997	0.09845	5.495	1064	0.12264	5.495	802	0.04359	5.495	944	0.07555
5.51	1048	0.07348	5.51	978	0.06765	5.51	1042	0.10289	5.51	1041	0.11999	5.51	796	0.04326	5.51	957	0.07659
5.525	1042	0.07306	5.525	947	0.06551	5.525	979	0.09667	5.525	1052	0.12125	5.525	808	0.04392	5.525	978	0.07827
5.54	1021	0.07158	5.54	934	0.06461	5.54	955	0.0943	5.54	1102	0.12702	5.54	783	0.04256	5.54	979	0.07835
5.555	976	0.06843	5.555	968	0.06696	5.555	1020	0.10072	5.555	1083	0.12483	5.555	763	0.04147	5.555	967	0.07739
5.57	962	0.06745	5.57	934	0.06461	5.57	1029	0.10161	5.57	1013	0.11676	5.57	801	0.04353	5.57	939	0.07515
5.585	1001	0.07018	5.585	966	0.06682	5.585	1014	0.10013	5.585	1030	0.11872	5.585	786	0.04272	5.585	956	0.07651
5.6	1033	0.07243	5.6	976	0.06752	5.6	1038	0.1025	5.6	1035	0.11929	5.6	770	0.04185	5.6	963	0.07707
5.615	1021	0.07158	5.615	939	0.06496	5.615	1010	0.09973	5.615	1078	0.12425	5.615	761	0.04136	5.615	988	0.07907
5.63	1041	0.07299	5.63	956	0.06613	5.63	1003	0.09904	5.63	1071	0.12344	5.63	749	0.04071	5.63	962	0.07699
5.645	1032	0.07236	5.645	947	0.06551	5.645	994	0.09815	5.645	1071	0.12344	5.645	791	0.04299	5.645	970	0.07763
5.66	1012	0.07095	5.66	951	0.06579	5.66	1027	0.10141	5.66	1042	0.1201	5.66	791	0.04299	5.66	1018	0.08147
5.675	1020	0.07151	5.675	954	0.06599	5.675	1003	0.09904	5.675	1084	0.12494	5.675	783	0.04256	5.675	1009	0.08075
5.69	1016	0.07123	5.69	944	0.0653	5.69	991	0.09786	5.69	1091	0.12575	5.69	749	0.04071	5.69	988	0.07907
5.705	1002	0.07025	5.705	956	0.06613	5.705	1038	0.1025	5.705	1063	0.12252	5.705	809	0.04397	5.705	969	0.07755
5.72	1008	0.07067	5.72	959	0.06634	5.72	1010	0.09973	5.72	1017	0.11722	5.72	793	0.0431	5.72	984	0.07875
5.735	1026	0.07193	5.735	975	0.06745	5.735	999	0.09865	5.735	1050	0.12102	5.735	786	0.04272	5.735	1004	0.08035
5.75	1002	0.07025	5.75	974	0.06738	5.75	1007	0.09944	5.75	1059	0.12206	5.75	793	0.0431	5.75	1016	0.08131
5.765	968	0.06787	5.765	903	0.06247	5.765	1027	0.10141	5.765	1120	0.12909	5.765	763	0.04147	5.765	989	0.07915
5.78	1015	0.07116	5.78	941	0.06509	5.78	1030	0.10171	5.78	1070	0.12333	5.78	761	0.04136	5.78	1020	0.08163
5.795	973	0.06822	5.795	990	0.06848	5.795	1057	0.10437	5.795	1058	0.12195	5.795	790	0.04294	5.795	1004	0.08035
5.81	1014	0.07109	5.81	989	0.06841	5.81	1037	0.1024	5.81	1024	0.11803	5.81	781	0.04245	5.81	1004	0.08035
5.825	1068	0.07488	5.825	1007	0.06966	5.825	1059	0.10457	5.825	1058	0.12195	5.825	819	0.04451	5.825	975	0.07803
5.84	999	0.07004	5.84	983	0.068	5.84	1065	0.10516	5.84	1049	0.12091	5.84	812	0.04413	5.84	978	0.07827
5.855	1016	0.07123	5.855	962	0.06655	5.855	1008	0.09954	5.855	1014	0.11687	5.855	789	0.04288	5.855	1002	0.08019
5.87	1060	0.07432	5.87	974	0.06738	5.87	1013	0.10003	5.87	1042	0.1201	5.87	785	0.04267	5.87	1034	0.08275
5.885	1062	0.07446	5.885	1000	0.06918	5.885	1010	0.09973	5.885	1088	0.1254	5.885	794	0.04315	5.885	973	0.07787
5.9	1037	0.07271	5.9	897	0.06205	5.9	1032	0.10191	5.9	1055	0.1216	5.9	811	0.04408	5.9	977	0.07819
5.915	964	0.06759	5.915	950	0.06572	5.915	991	0.09786	5.915	1094	0.12609	5.915	813	0.04419	5.915	987	0.07899
5.93	965	0.06766	5.93	951	0.06579	5.93	1021	0.10082	5.93	1060	0.12218	5.93	785	0.04267	5.93	979	0.07835
5.945	1039	0.07285	5.945	954	0.06599	5.945	985	0.09726	5.945	1026	0.11826	5.945	757	0.04114	5.945	1005	0.08043
5.96	1048	0.07348	5.96	949	0.06565	5.96	972	0.09598	5.96	1036	0.11941	5.96	728	0.03957	5.96	957	0.07659
5.975	1033	0.07243	5.975	981	0.06786	5.975	998	0.09855	5.975	1121	0.12921	5.975	789	0.04288	5.975	985	0.07883
5.99	1033	0.07243	5.99	1018	0.07042	5.99	938	0.09262	5.99	1108	0.12771	5.99	798	0.04337	5.99	1008	0.08067
6.005	1078	0.07558	6.005	984	0.06807	6.005	962	0.09499	6.005	1070	0.12333	6.005	794	0.04315	6.005	971	0.07771
6.02	1025	0.07186	6.02	935	0.06468	6.02	987	0.09746	6.02	1052	0.12125	6.02	750	0.04076	6.02	964	0.07715
6.035	998	0.06997	6.035	934	0.06461	6.035	978	0.09657	6.035	1039	0.11976	6.035	728	0.03957	6.035	987	0.07899
6.05	986	0.06913	6.05	937	0.06482	6.05	1041	0.10279	6.05	1050	0.12102	6.05	772	0.04196	6.05	977	0.07819
6.065	981	0.06878	6.065	930	0.06433	6.065	1004	0.09914	6.065	1007	0.11607	6.065	752	0.04087	6.065	968	0.07747
6.08	950	0.06661	6.08	929	0.06426	6.08	1000	0.09875	6.08	1027	0.11837	6.08	773	0.04201	6.08	916	0.07331
6.095	960	0.06731	6.095	942	0.06516	6.095	951	0.09391	6.095	1033	0.11906	6.095	744	0.04044	6.095	925	0.07403
6.11	987	0.0692	6.11	905	0.0626	6.11	994	0.09815	6.11	1042	0.1201	6.11	762	0.04142	6.11	958	0.07667
6.125	1018	0.07137	6.125	914	0.06323	6.125	999	0.09865	6.125	1049	0.12091	6.125	754	0.04098	6.125	967	0.07739
6.14	965	0.06766	6.14	929	0.06426	6.14	994	0.09815	6.14	957	0.1103	6.14	768	0.04174	6.14	969	0.07755
6.155	1008	0.07067	6.155	961	0.06648	6.155	1029	0.10161	6.155	1007	0.11607	6.155	770	0.04185	6.155	920	0.07363
6.17	1017	0.0713	6.17	957	0.0662	6.17	972	0.09598	6.17	1038	0.11964	6.17	748	0.04065	6.17	958	0.07667
6.185	991	0.06948	6.185	994	0.06876	6.185	1037	0.1024	6.185	1059	0.12206	6.185	738	0.04011	6.185	914	0.07315
6.2	1044	0.0732	6.2	1000	0.06918	6.2	1009	0.09963	6.2	1086	0.12517	6.2	757	0.04114	6.2	925	0.07403
6.215	1011	0.07088	6.215	928	0.06419	6.215	940	0.09282	6.215	1042	0.1201	6.215	776	0.04218	6.215	954	0.07635
6.23	1004	0.07039	6.23	904	0.06253	6.23	966	0.09539	6.23	1053	0.12137	6.23	772	0.04196	6.23	950	0.07603
6.245	1022	0.07165	6.245	950	0.06572	6.245	951	0.09391	6.245	1065	0.12275	6.245	770	0.04185	6.245	968	0.07747
6.26	996	0.06983	6.26	929	0.06426	6.26	1000	0.09875	6.26	1044	0.12033	6.26	808	0.04392	6.26	1003	0.08027
6.275	990	0.06941	6.275	916	0.06336	6.275	971	0.09588	6.275	1064	0.12264	6.275	747	0.0406	6.275	993	0.07947
6.29	948	0.06647	6.29	926	0.06406	6.29	953	0.0941	6.29	1080	0.12448	6.29	736	0.04	6.29	945	0.07563
6.305	967	0.0678	6.305	924	0.06392	6.305	1024	0.10112	6.305	1054	0.12148	6.305	784	0.04261	6.305	959	0.07675
6.32	956	0.06703	6.32	977	0.06758	6.32	949	0.09371	6.32	1031	0.11883	6.32	748	0.04065	6.32	974	0.07795
6.335	994	0.06969	6.335	976	0.06752	6.335	949	0.09371	6.335	1050	0.12102	6.335	751	0.04082	6.335	974	0.07795
6.35	998	0.06997	6.35	991	0.06855	6.35	1014	0.10013	6.35	1051	0.12114	6.35	781	0.04245	6.35	953	0.07627
6.365	972	0.06815	6.365	956	0.06613	6.365	992	0.09796	6.365	1077	0.12414	6.365	747	0.0406	6.365	966	0.07731
6.38	975	0.06836	6.38	940	0.06502	6.38	1011	0.09983	6.38	1052	0.12125	6.38	747	0.0406	6.38	989	0.07915
6.395	1030	0.07221	6.395	985	0.06814	6.395	996	0.09835	6.395	1059	0.12206	6.395	765	0.04158	6.395	999	0.07995
6.41	979	0.06864	6.41	942	0.06516	6.41	1005	0.09924	6.41	1062	0.12241	6.41	724	0.03935	6.41	982	0.07859
6.425	963	0.06752	6.425	948	0.06558	6.425	972	0.09598	6.425	1066	0.12287	6.425	757	0.04114	6.425	958	0.07667
6.44	994	0.06969	6.44	1005	0.06952	6.44	1031	0.10181	6.44	1028	0.11849	6.44	779	0.04234	6.44	975	0.07803
6.455	1011	0.07088	6.455	987	0.06828	6.455	1015	0.10023	6.455	1039	0.11976	6.455	762	0.04142	6.455	995	0.07963
6.47	967	0.0678	6.47	983	0.068	6.47	956	0.0944	6.47	1053	0.12137	6.47	754	0.04098	6.47	970	0.07763
6.485	974	0.06829	6.485	970	0.0671	6.485	992	0.09796	6.485	1057	0.12183	6.485	766	0.04163	6.485	929	0.07435
6.5	954	0.06689	6.5	943	0.06523	6.5	962	0.09499	6.5	1106	0.12748	6.5	762	0.04142	6.5	956	0.07651
6.515	938	0.06576	6.515	977	0.06758	6.515	971	0.09588	6.515	1114	0.1284	6.515	719	0.03908	6.515	952	0.07619
6.53	999	0.07004	6.53	961	0.06648	6.53	952	0.09401	6.53	1052	0.12125	6.53	770	0.04185	6.53	992	0.07939
6.545	965	0.06766	6.545	956	0.06613	6.545	960	0.0948	6.545	1030	0.11872	6.545	794	0.04315	6.545	998	0.07987
6.56	956	0.06703	6.56	976	0.06752	6.56	898	0.08867	6.56	1093	0.12598	6.56	731	0.03973	6.56	978	0.07827
6.575	986	0.06913	6.575	967	0.06689	6.575	961	0.09489	6.575	1020	0.11757	6.575	775	0.04212	6.575	975	0.07803
6.59	978	0.06857	6.59	979	0.06772	6.59	984	0.09717	6.59	1063	0.12252	6.59	791	0.04299	6.59	957	0.07659
6.605	982	0.06885	6.605	938	0.06489	6.605	1003	0.09904	6.605	1090	0.12563	6.605	799	0.04343	6.605	922	0.07379
6.62	1040	0.07292	6.62	961	0.06648	6.62	1031	0.10181	6.62	1084	0.12494	6.62	786	0.04272	6.62	952	0.07619
6.635	1047	0.07341	6.635	942	0.06516	6.635	1036	0.1023	6.635	1100	0.12679	6.635	790	0.04294	6.635	935	0.07483
6.65	1011	0.07088	6.65	939	0.06496	6.65	1002	0.09894	6.65	1102	0.12702	6.65	785	0.04267	6.65	949	0.07595
6.665	968	0.06787	6.665	973	0.06731	6.665	1037	0.1024	6.665	1060	0.12218	6.665	736	0.04	6.665	963	0.07707
6.68	1018	0.07137	6.68	943	0.06523	6.68	973	0.09608	6.68	1081	0.1246	6.68	737	0.04006	6.68	974	0.07795
6.695	1009	0.07074	6.695	962	0.06655	6.695	1012	0.09993	6.695	1088	0.1254	6.695	729	0.03962	6.695	1002	0.08019
6.71	968	0.06787	6.71	986	0.06821	6.71	1004	0.09914	6.71	1093	0.12598	6.71	739	0.04017	6.71	963	0.07707
6.725	991	0.06948	6.725	999	0.06911	6.725	961	0.09489	6.725	1102	0.12702	6.725	729	0.03962	6.725	950	0.07603
6.74	1010	0.07081	6.74	961	0.06648	6.74	958	0.0946	6.74	1128	0.13001	6.74	760	0.04131	6.74	963	0.07707
6.755	989	0.06934	6.755	949	0.06565	6.755	1014	0.10013	6.755	1147	0.1322	6.755	781	0.04245	6.755	992	0.07939
6.77	967	0.0678	6.77	949	0.06565	6.77	1086	0.10724	6.77	1077	0.12414	6.77	773	0.04201	6.77	977	0.07819
6.785	965	0.06766	6.785	925	0.06399	6.785	978	0.09657	6.785	1091	0.12575	6.785	776	0.04218	6.785	963	0.07707
6.8	1036	0.07264	6.8	943	0.06523	6.8	1061	0.10477	6.8	1120	0.12909	6.8	726	0.03946	6.8	982	0.07859
6.815	1033	0.07243	6.815	939	0.06496	6.815	1026	0.10131	6.815	1093	0.12598	6.815	762	0.04142	6.815	961	0.07691
6.83	1037	0.07271	6.83	955	0.06606	6.83	1023	0.10102	6.83	1094	0.12609	6.83	769	0.0418	6.83	991	0.07931
6.845	1045	0.07327	6.845	1009	0.0698	6.845	1008	0.09954	6.845	1089	0.12552	6.845	749	0.04071	6.845	987	0.07899
6.86	960	0.06731	6.86	938	0.06489	6.86	987	0.09746	6.86	1087	0.12529	6.86	777	0.04223	6.86	972	0.07779
6.875	1044	0.0732	6.875	971	0.06717	6.875	991	0.09786	6.875	1144	0.13186	6.875	757	0.04114	6.875	951	0.07611
6.89	1028	0.07207	6.89	973	0.06731	6.89	979	0.09667	6.89	1065	0.12275	6.89	794	0.04315	6.89	1003	0.08027
6.905	1059	0.07425	6.905	965	0.06675	6.905	1021	0.10082	6.905	1102	0.12702	6.905	776	0.04218	6.905	1039	0.08315
6.92	966	0.06773	6.92	939	0.06496	6.92	1002	0.09894	6.92	1124	0.12955	6.92	767	0.04169	6.92	1040	0.08323
6.935	1038	0.07278	6.935	967	0.06689	6.935	1008	0.09954	6.935	1159	0.13359	6.935	736	0.04	6.935	1016	0.08131
6.95	1039	0.07285	6.95	983	0.068	6.95	971	0.09588	6.95	1136	0.13094	6.95	760	0.04131	6.95	1022	0.08179
6.965	1010	0.07081	6.965	960	0.06641	6.965	946	0.09341	6.965	1064	0.12264	6.965	711	0.03864	6.965	973	0.07787
6.98	1013	0.07102	6.98	997	0.06897	6.98	992	0.09796	6.98	1117	0.12875	6.98	762	0.04142	6.98	971	0.07771
6.995	996	0.06983	6.995	993	0.06869	6.995	1000	0.09875	6.995	1142	0.13163	6.995	750	0.04076	6.995	1004	0.08035
7.01	975	0.06836	7.01	989	0.06841	7.01	1036	0.1023	7.01	1108	0.12771	7.01	766	0.04163	7.01	1025	0.08203
7.025	985	0.06906	7.025	932	0.06447	7.025	1021	0.10082	7.025	1052	0.12125	7.025	767	0.04169	7.025	1003	0.08027
7.04	1021	0.07158	7.04	1003	0.06938	7.04	1007	0.09944	7.04	1069	0.12321	7.04	758	0.0412	7.04	1012	0.08099
7.055	981	0.06878	7.055	973	0.06731	7.055	997	0.09845	7.055	1067	0.12298	7.055	761	0.04136	7.055	961	0.07691
7.07	965	0.06766	7.07	969	0.06703	7.07	963	0.09509	7.07	1091	0.12575	7.07	735	0.03995	7.07	968	0.07747
7.085	950	0.06661	7.085	995	0.06883	7.085	926	0.09144	7.085	1138	0.13117	7.085	717	0.03897	7.085	996	0.07971
7.1	987	0.0692	7.1	952	0.06586	7.1	941	0.09292	7.1	1087	0.12529	7.1	751	0.04082	7.1	962	0.07699
7.115	962	0.06745	7.115	981	0.06786	7.115	951	0.09391	7.115	1040	0.11987	7.115	757	0.04114	7.115	993	0.07947
7.13	965	0.06766	7.13	941	0.06509	7.13	1027	0.10141	7.13	1080	0.12448	7.13	745	0.04049	7.13	1020	0.08163
7.145	1010	0.07081	7.145	920	0.06364	7.145	1037	0.1024	7.145	1089	0.12552	7.145	769	0.0418	7.145	1034	0.08275
7.16	973	0.06822	7.16	947	0.06551	7.16	1026	0.10131	7.16	1120	0.12909	7.16	769	0.0418	7.16	1019	0.08155
7.175	992	0.06955	7.175	971	0.06717	7.175	1021	0.10082	7.175	1106	0.12748	7.175	749	0.04071	7.175	998	0.07987
7.19	985	0.06906	7.19	1004	0.06945	7.19	996	0.09835	7.19	1127	0.1299	7.19	702	0.03815	7.19	953	0.07627
7.205	1037	0.07271	7.205	947	0.06551	7.205	1030	0.10171	7.205	1101	0.1269	7.205	735	0.03995	7.205	960	0.07683
7.22	1012	0.07095	7.22	955	0.06606	7.22	1002	0.09894	7.22	1112	0.12817	7.22	774	0.04207	7.22	982	0.07859
7.235	1007	0.0706	7.235	937	0.06482	7.235	1036	0.1023	7.235	1137	0.13105	7.235	754	0.04098	7.235	996	0.07971
7.25	993	0.06962	7.25	920	0.06364	7.25	1038	0.1025	7.25	1120	0.12909	7.25	726	0.03946	7.25	1002	0.08019
7.265	1014	0.07109	7.265	936	0.06475	7.265	1078	0.10645	7.265	1128	0.13001	7.265	705	0.03832	7.265	994	0.07955
7.28	994	0.06969	7.28	956	0.06613	7.28	1025	0.10121	7.28	1159	0.13359	7.28	749	0.04071	7.28	1010	0.08083
7.295	1004	0.07039	7.295	908	0.06281	7.295	994	0.09815	7.295	1151	0.13266	7.295	766	0.04163	7.295	948	0.07587
7.31	1028	0.07207	7.31	951	0.06579	7.31	943	0.09312	7.31	1131	0.13036	7.31	749	0.04071	7.31	945	0.07563
7.325	1051	0.07369	7.325	917	0.06343	7.325	1037	0.1024	7.325	1110	0.12794	7.325	771	0.0419	7.325	968	0.07747
7.34	1033	0.07243	7.34	976	0.06752	7.34	1053	0.10398	7.34	1180	0.13601	7.34	739	0.04017	7.34	990	0.07923
7.355	1003	0.07032	7.355	1011	0.06994	7.355	1021	0.10082	7.355	1156	0.13324	7.355	729	0.03962	7.355	963	0.07707
7.37	1009	0.07074	7.37	966	0.06682	7.37	1051	0.10378	7.37	1106	0.12748	7.37	705	0.03832	7.37	1002	0.08019
7.385	1014	0.07109	7.385	950	0.06572	7.385	1044	0.10309	7.385	1155	0.13313	7.385	731	0.03973	7.385	982	0.07859
7.4	1009	0.07074	7.4	1009	0.0698	7.4	1029	0.10161	7.4	1169	0.13474	7.4	777	0.04223	7.4	1009	0.08075
7.415	997	0.0699	7.415	990	0.06848	7.415	1002	0.09894	7.415	1188	0.13693	7.415	760	0.04131	7.415	1043	0.08347
7.43	978	0.06857	7.43	987	0.06828	7.43	1010	0.09973	7.43	1126	0.12978	7.43	785	0.04267	7.43	1057	0.08459
7.445	1013	0.07102	7.445	967	0.06689	7.445	1034	0.1021	7.445	1120	0.12909	7.445	729	0.03962	7.445	985	0.07883
7.46	1053	0.07383	7.46	965	0.06675	7.46	1022	0.10092	7.46	1097	0.12644	7.46	717	0.03897	7.46	996	0.07971
7.475	1040	0.07292	7.475	953	0.06592	7.475	1003	0.09904	7.475	1174	0.13532	7.475	715	0.03886	7.475	1003	0.08027
7.49	1006	0.07053	7.49	982	0.06793	7.49	1027	0.10141	7.49	1195	0.13774	7.49	729	0.03962	7.49	1012	0.08099
7.505	1005	0.07046	7.505	994	0.06876	7.505	1033	0.102	7.505	1203	0.13866	7.505	731	0.03973	7.505	966	0.07731
7.52	1013	0.07102	7.52	1012	0.07001	7.52	1042	0.10289	7.52	1201	0.13843	7.52	774	0.04207	7.52	1014	0.08115
7.535	983	0.06892	7.535	1012	0.07001	7.535	1037	0.1024	7.535	1241	0.14304	7.535	745	0.04049	7.535	1017	0.08139
7.55	1030	0.07221	7.55	976	0.06752	7.55	1061	0.10477	7.55	1196	0.13785	7.55	763	0.04147	7.55	1014	0.08115
7.565	1084	0.076	7.565	1009	0.0698	7.565	1074	0.10605	7.565	1205	0.13889	7.565	730	0.03968	7.565	1014	0.08115
7.58	1071	0.07509	7.58	1003	0.06938	7.58	1070	0.10566	7.58	1152	0.13278	7.58	725	0.0394	7.58	993	0.07947
7.595	1060	0.07432	7.595	1035	0.0716	7.595	1071	0.10576	7.595	1169	0.13474	7.595	738	0.04011	7.595	1017	0.08139
7.61	1058	0.07418	7.61	938	0.06489	7.61	1048	0.10349	7.61	1161	0.13382	7.61	744	0.04044	7.61	1031	0.08251
7.625	1082	0.07586	7.625	1036	0.07167	7.625	1060	0.10467	7.625	1163	0.13405	7.625	751	0.04082	7.625	1136	0.09092
7.64	1060	0.07432	7.64	1009	0.0698	7.64	1060	0.10467	7.64	1227	0.14142	7.64	756	0.04109	7.64	1024	0.08195
7.655	1038	0.07278	7.655	991	0.06855	7.655	1015	0.10023	7.655	1232	0.142	7.655	761	0.04136	7.655	998	0.07987
7.67	1017	0.0713	7.67	995	0.06883	7.67	1066	0.10526	7.67	1213	0.13981	7.67	690	0.0375	7.67	985	0.07883
7.685	1020	0.07151	7.685	1065	0.07367	7.685	1041	0.10279	7.685	1175	0.13543	7.685	756	0.04109	7.685	995	0.07963
7.7	1040	0.07292	7.7	1039	0.07187	7.7	1030	0.10171	7.7	1255	0.14465	7.7	763	0.04147	7.7	976	0.07811
7.715	1052	0.07376	7.715	999	0.06911	7.715	1021	0.10082	7.715	1267	0.14604	7.715	765	0.04158	7.715	1026	0.08211
7.73	1115	0.07817	7.73	979	0.06772	7.73	1048	0.10349	7.73	1219	0.1405	7.73	757	0.04114	7.73	1047	0.08379
7.745	1087	0.07621	7.745	978	0.06765	7.745	1102	0.10882	7.745	1214	0.13993	7.745	794	0.04315	7.745	1047	0.08379
7.76	1098	0.07698	7.76	1027	0.07104	7.76	1097	0.10832	7.76	1189	0.13704	7.76	780	0.04239	7.76	1031	0.08251
7.775	1068	0.07488	7.775	1046	0.07236	7.775	1083	0.10694	7.775	1157	0.13336	7.775	759	0.04125	7.775	1085	0.08683
7.79	1069	0.07495	7.79	1051	0.0727	7.79	1075	0.10615	7.79	1203	0.13866	7.79	740	0.04022	7.79	1026	0.08211
7.805	1049	0.07355	7.805	1009	0.0698	7.805	1073	0.10595	7.805	1269	0.14627	7.805	735	0.03995	7.805	1043	0.08347
7.82	993	0.06962	7.82	1012	0.07001	7.82	1017	0.10042	7.82	1214	0.13993	7.82	750	0.04076	7.82	1073	0.08587
7.835	1074	0.0753	7.835	1037	0.07173	7.835	1076	0.10625	7.835	1217	0.14027	7.835	791	0.04299	7.835	1075	0.08603
7.85	1078	0.07558	7.85	1086	0.07512	7.85	1088	0.10744	7.85	1232	0.142	7.85	747	0.0406	7.85	1059	0.08475
7.865	1123	0.07874	7.865	977	0.06758	7.865	1068	0.10546	7.865	1197	0.13797	7.865	757	0.04114	7.865	1090	0.08723
7.88	1106	0.07754	7.88	998	0.06904	7.88	1098	0.10842	7.88	1287	0.14834	7.88	756	0.04109	7.88	1048	0.08387
7.895	1070	0.07502	7.895	1068	0.07388	7.895	1092	0.10783	7.895	1227	0.14142	7.895	757	0.04114	7.895	1046	0.08371
7.91	1101	0.07719	7.91	1089	0.07533	7.91	1118	0.1104	7.91	1215	0.14004	7.91	745	0.04049	7.91	1066	0.08531
7.925	1051	0.07369	7.925	1077	0.0745	7.925	1103	0.10892	7.925	1269	0.14627	7.925	775	0.04212	7.925	1080	0.08643
7.94	1084	0.076	7.94	1087	0.07519	7.94	1060	0.10467	7.94	1303	0.15018	7.94	762	0.04142	7.94	1093	0.08747
7.955	1102	0.07726	7.955	1064	0.0736	7.955	1061	0.10477	7.955	1273	0.14673	7.955	845	0.04593	7.955	1079	0.08635
7.97	1089	0.07635	7.97	1087	0.07519	7.97	1100	0.10862	7.97	1326	0.15284	7.97	741	0.04027	7.97	1096	0.08772
7.985	1072	0.07516	7.985	1073	0.07423	7.985	1072	0.10586	7.985	1371	0.15802	7.985	810	0.04402	7.985	1047	0.08379
8	1080	0.07572	8	1052	0.07277	8	1059	0.10457	8	1376	0.1586	8	806	0.04381	8	1024	0.08195
8.015	1124	0.07881	8.015	1052	0.07277	8.015	1115	0.1101	8.015	1268	0.14615	8.015	772	0.04196	8.015	1089	0.08715
8.03	1106	0.07754	8.03	1061	0.0734	8.03	1075	0.10615	8.03	1288	0.14846	8.03	724	0.03935	8.03	1081	0.08651
8.045	1040	0.07292	8.045	1090	0.0754	8.045	1100	0.10862	8.045	1271	0.1465	8.045	719	0.03908	8.045	1072	0.08579
8.06	1059	0.07425	8.06	1089	0.07533	8.06	1064	0.10507	8.06	1297	0.14949	8.06	782	0.0425	8.06	1054	0.08435
8.075	1054	0.0739	8.075	1078	0.07457	8.075	1119	0.1105	8.075	1202	0.13854	8.075	732	0.03978	8.075	1055	0.08443
8.09	1069	0.07495	8.09	1091	0.07547	8.09	1092	0.10783	8.09	1247	0.14373	8.09	689	0.03745	8.09	1024	0.08195
8.105	1056	0.07404	8.105	1010	0.06987	8.105	1106	0.10921	8.105	1236	0.14246	8.105	719	0.03908	8.105	994	0.07955
8.12	1076	0.07544	8.12	1012	0.07001	8.12	1056	0.10428	8.12	1289	0.14857	8.12	780	0.04239	8.12	1018	0.08147
8.135	1099	0.07705	8.135	1025	0.0709	8.135	1092	0.10783	8.135	1289	0.14857	8.135	744	0.04044	8.135	1053	0.08427
8.15	1029	0.07214	8.15	1089	0.07533	8.15	1071	0.10576	8.15	1290	0.14869	8.15	743	0.04038	8.15	1089	0.08715
8.165	1097	0.07691	8.165	1047	0.07243	8.165	1110	0.10961	8.165	1290	0.14869	8.165	714	0.03881	8.165	1032	0.08259
8.18	1108	0.07768	8.18	1069	0.07395	8.18	1067	0.10536	8.18	1280	0.14753	8.18	710	0.03859	8.18	1083	0.08667
8.195	1106	0.07754	8.195	1077	0.0745	8.195	1132	0.11178	8.195	1313	0.15134	8.195	744	0.04044	8.195	1110	0.08884
8.21	1030	0.07221	8.21	1114	0.07706	8.21	1119	0.1105	8.21	1297	0.14949	8.21	745	0.04049	8.21	1089	0.08715
8.225	1092	0.07656	8.225	1069	0.07395	8.225	1108	0.10941	8.225	1324	0.1526	8.225	753	0.04093	8.225	1082	0.08659
8.24	1083	0.07593	8.24	1038	0.0718	8.24	1119	0.1105	8.24	1261	0.14534	8.24	732	0.03978	8.24	1046	0.08371
8.255	1068	0.07488	8.255	1095	0.07575	8.255	1111	0.10971	8.255	1327	0.15295	8.255	737	0.04006	8.255	1143	0.09148
8.27	1145	0.08028	8.27	1060	0.07333	8.27	1131	0.11168	8.27	1318	0.15191	8.27	812	0.04413	8.27	1136	0.09092
8.285	1105	0.07747	8.285	1091	0.07547	8.285	1173	0.11583	8.285	1334	0.15376	8.285	818	0.04446	8.285	1094	0.08756
8.3	1097	0.07691	8.3	1082	0.07485	8.3	1091	0.10773	8.3	1292	0.14892	8.3	797	0.04332	8.3	1084	0.08675
8.315	1103	0.07733	8.315	1050	0.07263	8.315	1131	0.11168	8.315	1301	0.14995	8.315	762	0.04142	8.315	1074	0.08595
8.33	1107	0.07761	8.33	1117	0.07727	8.33	1120	0.1106	8.33	1338	0.15422	8.33	735	0.03995	8.33	1076	0.08611
8.345	1092	0.07656	8.345	1119	0.07741	8.345	1127	0.11129	8.345	1359	0.15664	8.345	752	0.04087	8.345	1073	0.08587
8.36	1156	0.08105	8.36	1115	0.07713	8.36	1142	0.11277	8.36	1360	0.15675	8.36	750	0.04076	8.36	1122	0.0898
8.375	1079	0.07565	8.375	1108	0.07665	8.375	1188	0.11731	8.375	1353	0.15595	8.375	752	0.04087	8.375	1063	0.08507
8.39	1184	0.08301	8.39	1092	0.07554	8.39	1181	0.11662	8.39	1325	0.15272	8.39	746	0.04055	8.39	1080	0.08643
8.405	1151	0.0807	8.405	1101	0.07616	8.405	1125	0.11109	8.405	1406	0.16206	8.405	760	0.04131	8.405	1141	0.09132
8.42	1165	0.08168	8.42	1120	0.07748	8.42	1153	0.11385	8.42	1410	0.16252	8.42	780	0.04239	8.42	1127	0.0902
8.435	1163	0.08154	8.435	1074	0.07429	8.435	1167	0.11524	8.435	1348	0.15537	8.435	769	0.0418	8.435	1162	0.093
8.45	1126	0.07895	8.45	1108	0.07665	8.45	1189	0.11741	8.45	1346	0.15514	8.45	744	0.04044	8.45	1151	0.09212
8.465	1137	0.07972	8.465	1072	0.07416	8.465	1165	0.11504	8.465	1396	0.1609	8.465	741	0.04027	8.465	1131	0.09052
8.48	1166	0.08175	8.48	1115	0.07713	8.48	1183	0.11682	8.48	1377	0.15871	8.48	790	0.04294	8.48	1148	0.09188
8.495	1156	0.08105	8.495	1132	0.07831	8.495	1188	0.11731	8.495	1372	0.15814	8.495	769	0.0418	8.495	1176	0.09412
8.51	1115	0.07817	8.51	1167	0.08073	8.51	1176	0.11613	8.51	1363	0.1571	8.51	769	0.0418	8.51	1125	0.09004
8.525	1153	0.08084	8.525	1153	0.07976	8.525	1165	0.11504	8.525	1452	0.16736	8.525	745	0.04049	8.525	1175	0.09404
8.54	1135	0.07958	8.54	1141	0.07893	8.54	1175	0.11603	8.54	1455	0.1677	8.54	750	0.04076	8.54	1133	0.09068
8.555	1178	0.08259	8.555	1117	0.07727	8.555	1133	0.11188	8.555	1388	0.15998	8.555	729	0.03962	8.555	1149	0.09196
8.57	1163	0.08154	8.57	1130	0.07817	8.57	1187	0.11721	8.57	1360	0.15675	8.57	767	0.04169	8.57	1181	0.09452
8.585	1175	0.08238	8.585	1108	0.07665	8.585	1239	0.12235	8.585	1359	0.15664	8.585	768	0.04174	8.585	1174	0.09396
8.6	1133	0.07944	8.6	1139	0.07879	8.6	1190	0.11751	8.6	1378	0.15883	8.6	770	0.04185	8.6	1104	0.08836
8.615	1136	0.07965	8.615	1120	0.07748	8.615	1192	0.11771	8.615	1420	0.16367	8.615	763	0.04147	8.615	1141	0.09132
8.63	1162	0.08147	8.63	1181	0.0817	8.63	1173	0.11583	8.63	1400	0.16136	8.63	768	0.04174	8.63	1182	0.0946
8.645	1232	0.08638	8.645	1149	0.07948	8.645	1176	0.11613	8.645	1387	0.15987	8.645	776	0.04218	8.645	1166	0.09332
8.66	1187	0.08322	8.66	1159	0.08017	8.66	1242	0.12264	8.66	1391	0.16033	8.66	746	0.04055	8.66	1140	0.09124
8.675	1158	0.08119	8.675	1144	0.07914	8.675	1260	0.12442	8.675	1396	0.1609	8.675	739	0.04017	8.675	1158	0.09268
8.69	1163	0.08154	8.69	1178	0.08149	8.69	1254	0.12383	8.69	1392	0.16044	8.69	775	0.04212	8.69	1219	0.09756
8.705	1162	0.08147	8.705	1157	0.08004	8.705	1174	0.11593	8.705	1455	0.1677	8.705	753	0.04093	8.705	1202	0.0962
8.72	1137	0.07972	8.72	1144	0.07914	8.72	1129	0.11148	8.72	1472	0.16966	8.72	760	0.04131	8.72	1145	0.09164
8.735	1172	0.08217	8.735	1169	0.08087	8.735	1156	0.11415	8.735	1511	0.17416	8.735	769	0.0418	8.735	1173	0.09388
8.75	1169	0.08196	8.75	1159	0.08017	8.75	1196	0.1181	8.75	1422	0.1639	8.75	754	0.04098	8.75	1227	0.0982
8.765	1193	0.08364	8.765	1214	0.08398	8.765	1198	0.1183	8.765	1432	0.16505	8.765	763	0.04147	8.765	1172	0.0938
8.78	1230	0.08624	8.78	1148	0.07941	8.78	1154	0.11395	8.78	1406	0.16206	8.78	754	0.04098	8.78	1178	0.09428
8.795	1204	0.08441	8.795	1123	0.07768	8.795	1223	0.12077	8.795	1391	0.16033	8.795	776	0.04218	8.795	1159	0.09276
8.81	1164	0.08161	8.81	1210	0.0837	8.81	1240	0.12244	8.81	1403	0.16171	8.81	779	0.04234	8.81	1182	0.0946
8.825	1170	0.08203	8.825	1178	0.08149	8.825	1170	0.11553	8.825	1443	0.16632	8.825	772	0.04196	8.825	1203	0.09628
8.84	1176	0.08245	8.84	1153	0.07976	8.84	1228	0.12126	8.84	1442	0.16621	8.84	769	0.0418	8.84	1247	0.0998
8.855	1222	0.08568	8.855	1179	0.08156	8.855	1266	0.12501	8.855	1486	0.17128	8.855	758	0.0412	8.855	1227	0.0982
8.87	1267	0.08883	8.87	1166	0.08066	8.87	1220	0.12047	8.87	1454	0.16759	8.87	785	0.04267	8.87	1226	0.09812
8.885	1245	0.08729	8.885	1175	0.08128	8.885	1246	0.12304	8.885	1539	0.17739	8.885	744	0.04044	8.885	1185	0.09484
8.9	1226	0.08596	8.9	1205	0.08336	8.9	1255	0.12393	8.9	1511	0.17416	8.9	796	0.04326	8.9	1215	0.09724
8.915	1191	0.0835	8.915	1174	0.08121	8.915	1240	0.12244	8.915	1541	0.17762	8.915	791	0.04299	8.915	1279	0.10236
8.93	1192	0.08357	8.93	1199	0.08294	8.93	1232	0.12165	8.93	1525	0.17577	8.93	785	0.04267	8.93	1204	0.09636
8.945	1172	0.08217	8.945	1271	0.08792	8.945	1272	0.1256	8.945	1510	0.17404	8.945	808	0.04392	8.945	1219	0.09756
8.96	1256	0.08806	8.96	1212	0.08384	8.96	1275	0.1259	8.96	1531	0.17646	8.96	777	0.04223	8.96	1231	0.09852
8.975	1271	0.08911	8.975	1190	0.08232	8.975	1306	0.12896	8.975	1551	0.17877	8.975	770	0.04185	8.975	1200	0.09604
8.99	1274	0.08932	8.99	1181	0.0817	8.99	1252	0.12363	8.99	1559	0.17969	8.99	832	0.04522	8.99	1188	0.09508
9.005	1248	0.0875	9.005	1249	0.0864	9.005	1239	0.12235	9.005	1575	0.18154	9.005	807	0.04386	9.005	1215	0.09724
9.02	1262	0.08848	9.02	1235	0.08543	9.02	1303	0.12867	9.02	1547	0.17831	9.02	763	0.04147	9.02	1269	0.10156
9.035	1184	0.08301	9.035	1185	0.08197	9.035	1228	0.12126	9.035	1561	0.17992	9.035	731	0.03973	9.035	1195	0.09564
9.05	1185	0.08308	9.05	1176	0.08135	9.05	1206	0.11909	9.05	1486	0.17128	9.05	735	0.03995	9.05	1173	0.09388
9.065	1189	0.08336	9.065	1184	0.0819	9.065	1305	0.12886	9.065	1567	0.18061	9.065	787	0.04277	9.065	1232	0.0986
9.08	1157	0.08112	9.08	1171	0.081	9.08	1274	0.1258	9.08	1474	0.16989	9.08	783	0.04256	9.08	1193	0.09548
9.095	1183	0.08294	9.095	1197	0.0828	9.095	1264	0.12481	9.095	1494	0.1722	9.095	801	0.04353	9.095	1176	0.09412
9.11	1181	0.0828	9.11	1191	0.08239	9.11	1288	0.12718	9.11	1471	0.16955	9.11	798	0.04337	9.11	1202	0.0962
9.125	1250	0.08764	9.125	1173	0.08114	9.125	1260	0.12442	9.125	1487	0.17139	9.125	752	0.04087	9.125	1190	0.09524
9.14	1185	0.08308	9.14	1152	0.07969	9.14	1228	0.12126	9.14	1499	0.17278	9.14	778	0.04228	9.14	1203	0.09628
9.155	1235	0.08659	9.155	1201	0.08308	9.155	1167	0.11524	9.155	1468	0.1692	9.155	771	0.0419	9.155	1230	0.09844
9.17	1254	0.08792	9.17	1209	0.08363	9.17	1229	0.12136	9.17	1485	0.17116	9.17	767	0.04169	9.17	1214	0.09716
9.185	1232	0.08638	9.185	1232	0.08522	9.185	1239	0.12235	9.185	1518	0.17497	9.185	778	0.04228	9.185	1226	0.09812
9.2	1221	0.08561	9.2	1241	0.08585	9.2	1257	0.12412	9.2	1492	0.17197	9.2	792	0.04305	9.2	1196	0.09572
9.215	1221	0.08561	9.215	1173	0.08114	9.215	1275	0.1259	9.215	1550	0.17865	9.215	834	0.04533	9.215	1181	0.09452
9.23	1247	0.08743	9.23	1196	0.08273	9.23	1260	0.12442	9.23	1559	0.17969	9.23	808	0.04392	9.23	1222	0.0978
9.245	1282	0.08988	9.245	1202	0.08315	9.245	1199	0.1184	9.245	1560	0.17981	9.245	757	0.04114	9.245	1282	0.1026
9.26	1257	0.08813	9.26	1196	0.08273	9.26	1228	0.12126	9.26	1485	0.17116	9.26	746	0.04055	9.26	1279	0.10236
9.275	1214	0.08512	9.275	1197	0.0828	9.275	1261	0.12452	9.275	1499	0.17278	9.275	761	0.04136	9.275	1244	0.09956
9.29	1226	0.08596	9.29	1233	0.08529	9.29	1277	0.1261	9.29	1484	0.17105	9.29	757	0.04114	9.29	1188	0.09508
9.305	1237	0.08673	9.305	1240	0.08578	9.305	1287	0.12709	9.305	1487	0.17139	9.305	787	0.04277	9.305	1270	0.10164
9.32	1242	0.08708	9.32	1246	0.08619	9.32	1285	0.12689	9.32	1561	0.17992	9.32	791	0.04299	9.32	1223	0.09788
9.335	1247	0.08743	9.335	1251	0.08654	9.335	1282	0.12659	9.335	1558	0.17958	9.335	811	0.04408	9.335	1278	0.10228
9.35	1230	0.08624	9.35	1209	0.08363	9.35	1282	0.12659	9.35	1578	0.18188	9.35	783	0.04256	9.35	1268	0.10148
9.365	1227	0.08603	9.365	1209	0.08363	9.365	1266	0.12501	9.365	1566	0.1805	9.365	826	0.04489	9.365	1237	0.099
9.38	1202	0.08427	9.38	1224	0.08467	9.38	1269	0.12531	9.38	1582	0.18234	9.38	820	0.04457	9.38	1279	0.10236
9.395	1274	0.08932	9.395	1214	0.08398	9.395	1278	0.1262	9.395	1579	0.182	9.395	759	0.04125	9.395	1235	0.09884
9.41	1259	0.08827	9.41	1231	0.08515	9.41	1338	0.13212	9.41	1597	0.18407	9.41	756	0.04109	9.41	1245	0.09964
9.425	1252	0.08778	9.425	1280	0.08854	9.425	1235	0.12195	9.425	1536	0.17704	9.425	812	0.04413	9.425	1234	0.09876
9.44	1201	0.0842	9.44	1171	0.081	9.44	1279	0.1263	9.44	1552	0.17888	9.44	839	0.0456	9.44	1206	0.09652
9.455	1274	0.08932	9.455	1174	0.08121	9.455	1269	0.12531	9.455	1529	0.17623	9.455	797	0.04332	9.455	1227	0.0982
9.47	1237	0.08673	9.47	1215	0.08405	9.47	1277	0.1261	9.47	1543	0.17785	9.47	824	0.04479	9.47	1291	0.10332
9.485	1210	0.08483	9.485	1262	0.0873	9.485	1274	0.1258	9.485	1555	0.17923	9.485	781	0.04245	9.485	1222	0.0978
9.5	1236	0.08666	9.5	1258	0.08702	9.5	1363	0.13459	9.5	1597	0.18407	9.5	793	0.0431	9.5	1251	0.10012
9.515	1221	0.08561	9.515	1202	0.08315	9.515	1318	0.13015	9.515	1561	0.17992	9.515	804	0.0437	9.515	1199	0.09596
9.53	1261	0.08841	9.53	1252	0.08661	9.53	1294	0.12778	9.53	1607	0.18522	9.53	793	0.0431	9.53	1271	0.10172
9.545	1265	0.08869	9.545	1259	0.08709	9.545	1292	0.12758	9.545	1587	0.18292	9.545	746	0.04055	9.545	1212	0.097
9.56	1216	0.08526	9.56	1196	0.08273	9.56	1318	0.13015	9.56	1543	0.17785	9.56	775	0.04212	9.56	1222	0.0978
9.575	1244	0.08722	9.575	1183	0.08183	9.575	1299	0.12827	9.575	1587	0.18292	9.575	781	0.04245	9.575	1241	0.09932
9.59	1265	0.08869	9.59	1252	0.08661	9.59	1263	0.12472	9.59	1621	0.18684	9.59	776	0.04218	9.59	1241	0.09932
9.605	1294	0.09072	9.605	1250	0.08647	9.605	1278	0.1262	9.605	1614	0.18603	9.605	804	0.0437	9.605	1189	0.09516
9.62	1240	0.08694	9.62	1280	0.08854	9.62	1294	0.12778	9.62	1603	0.18476	9.62	805	0.04375	9.62	1282	0.1026
9.635	1242	0.08708	9.635	1207	0.08349	9.635	1276	0.126	9.635	1556	0.17935	9.635	763	0.04147	9.635	1268	0.10148
9.65	1277	0.08953	9.65	1206	0.08343	9.65	1270	0.12541	9.65	1616	0.18626	9.65	764	0.04152	9.65	1227	0.0982
9.665	1249	0.08757	9.665	1243	0.08599	9.665	1270	0.12541	9.665	1572	0.18119	9.665	800	0.04348	9.665	1258	0.10068
9.68	1233	0.08645	9.68	1259	0.08709	9.68	1289	0.12728	9.68	1554	0.17911	9.68	771	0.0419	9.68	1305	0.10444
9.695	1297	0.09093	9.695	1236	0.0855	9.695	1228	0.12126	9.695	1539	0.17739	9.695	812	0.04413	9.695	1234	0.09876
9.71	1267	0.08883	9.71	1219	0.08432	9.71	1261	0.12452	9.71	1583	0.18246	9.71	805	0.04375	9.71	1184	0.09476
9.725	1281	0.08981	9.725	1210	0.0837	9.725	1309	0.12926	9.725	1545	0.17808	9.725	774	0.04207	9.725	1276	0.10212
9.74	1284	0.09002	9.74	1285	0.08889	9.74	1317	0.13005	9.74	1500	0.17289	9.74	802	0.04359	9.74	1275	0.10204
9.755	1201	0.0842	9.755	1260	0.08716	9.755	1285	0.12689	9.755	1504	0.17335	9.755	790	0.04294	9.755	1276	0.10212
9.77	1291	0.09051	9.77	1246	0.08619	9.77	1322	0.13054	9.77	1598	0.18419	9.77	858	0.04663	9.77	1266	0.10132
9.785	1284	0.09002	9.785	1236	0.0855	9.785	1321	0.13044	9.785	1577	0.18177	9.785	816	0.04435	9.785	1266	0.10132
9.8	1258	0.0882	9.8	1245	0.08612	9.8	1275	0.1259	9.8	1548	0.17842	9.8	794	0.04315	9.8	1222	0.0978
9.815	1211	0.0849	9.815	1201	0.08308	9.815	1226	0.12106	9.815	1548	0.17842	9.815	803	0.04364	9.815	1283	0.10268
9.83	1235	0.08659	9.83	1203	0.08322	9.83	1243	0.12274	9.83	1571	0.18107	9.83	772	0.04196	9.83	1259	0.10076
9.845	1248	0.0875	9.845	1230	0.08509	9.845	1264	0.12481	9.845	1551	0.17877	9.845	838	0.04555	9.845	1311	0.10492
9.86	1250	0.08764	9.86	1149	0.07948	9.86	1307	0.12906	9.86	1535	0.17692	9.86	814	0.04424	9.86	1311	0.10492
9.875	1283	0.08995	9.875	1176	0.08135	9.875	1238	0.12225	9.875	1525	0.17577	9.875	825	0.04484	9.875	1206	0.09652
9.89	1218	0.0854	9.89	1219	0.08432	9.89	1248	0.12323	9.89	1582	0.18234	9.89	837	0.04549	9.89	1228	0.09828
9.905	1214	0.08512	9.905	1192	0.08246	9.905	1300	0.12837	9.905	1568	0.18073	9.905	810	0.04402	9.905	1296	0.10372
9.92	1223	0.08575	9.92	1208	0.08356	9.92	1369	0.13518	9.92	1589	0.18315	9.92	804	0.0437	9.92	1244	0.09956
9.935	1193	0.08364	9.935	1213	0.08391	9.935	1257	0.12412	9.935	1553	0.179	9.935	816	0.04435	9.935	1239	0.09916
9.95	1248	0.0875	9.95	1153	0.07976	9.95	1257	0.12412	9.95	1533	0.17669	9.95	839	0.0456	9.95	1262	0.101
9.965	1238	0.0868	9.965	1201	0.08308	9.965	1302	0.12857	9.965	1601	0.18453	9.965	814	0.04424	9.965	1247	0.0998
9.98	1195	0.08378	9.98	1169	0.08087	9.98	1275	0.1259	9.98	1548	0.17842	9.98	827	0.04495	9.98	1269	0.10156
9.995	1265	0.08869	9.995	1230	0.08509	9.995	1265	0.12491	9.995	1551	0.17877	9.995	757	0.04114	9.995	1259	0.10076
10.01	1256	0.08806	10.01	1162	0.08038	10.01	1255	0.12393	10.01	1612	0.1858	10.01	807	0.04386	10.01	1255	0.10044
10.025	1208	0.08469	10.025	1199	0.08294	10.025	1252	0.12363	10.025	1627	0.18753	10.025	807	0.04386	10.025	1248	0.09988
10.04	1152	0.08077	10.04	1221	0.08446	10.04	1250	0.12343	10.04	1508	0.17381	10.04	806	0.04381	10.04	1187	0.095
10.055	1182	0.08287	10.055	1180	0.08163	10.055	1222	0.12067	10.055	1508	0.17381	10.055	790	0.04294	10.055	1180	0.09444
10.07	1254	0.08792	10.07	1157	0.08004	10.07	1219	0.12037	10.07	1503	0.17324	10.07	798	0.04337	10.07	1230	0.09844
10.085	1210	0.08483	10.085	1113	0.07699	10.085	1171	0.11563	10.085	1461	0.1684	10.085	772	0.04196	10.085	1254	0.10036
10.1	1166	0.08175	10.1	1169	0.08087	10.1	1203	0.11879	10.1	1496	0.17243	10.1	759	0.04125	10.1	1133	0.09068
10.115	1162	0.08147	10.115	1183	0.08183	10.115	1227	0.12116	10.115	1487	0.17139	10.115	802	0.04359	10.115	1184	0.09476
10.13	1151	0.0807	10.13	1164	0.08052	10.13	1189	0.11741	10.13	1478	0.17036	10.13	745	0.04049	10.13	1178	0.09428
10.145	1250	0.08764	10.145	1126	0.07789	10.145	1215	0.11998	10.145	1551	0.17877	10.145	774	0.04207	10.145	1197	0.0958
10.16	1150	0.08063	10.16	1151	0.07962	10.16	1280	0.12639	10.16	1445	0.16655	10.16	785	0.04267	10.16	1167	0.0934
10.175	1151	0.0807	10.175	1147	0.07934	10.175	1171	0.11563	10.175	1412	0.16275	10.175	771	0.0419	10.175	1176	0.09412
10.19	1140	0.07993	10.19	1137	0.07865	10.19	1196	0.1181	10.19	1499	0.17278	10.19	797	0.04332	10.19	1210	0.09684
10.205	1185	0.08308	10.205	1136	0.07858	10.205	1248	0.12323	10.205	1477	0.17024	10.205	813	0.04419	10.205	1173	0.09388
10.22	1163	0.08154	10.22	1168	0.0808	10.22	1205	0.11899	10.22	1476	0.17012	10.22	787	0.04277	10.22	1210	0.09684
10.235	1149	0.08056	10.235	1183	0.08183	10.235	1170	0.11553	10.235	1494	0.1722	10.235	758	0.0412	10.235	1147	0.0918
10.25	1136	0.07965	10.25	1178	0.08149	10.25	1220	0.12047	10.25	1435	0.1654	10.25	748	0.04065	10.25	1154	0.09236
10.265	1134	0.07951	10.265	1189	0.08225	10.265	1218	0.12027	10.265	1406	0.16206	10.265	811	0.04408	10.265	1163	0.09308
10.28	1146	0.08035	10.28	1118	0.07734	10.28	1154	0.11395	10.28	1404	0.16183	10.28	775	0.04212	10.28	1141	0.09132
10.295	1123	0.07874	10.295	1151	0.07962	10.295	1171	0.11563	10.295	1480	0.17059	10.295	717	0.03897	10.295	1169	0.09356
10.31	1132	0.07937	10.31	1158	0.08011	10.31	1157	0.11425	10.31	1430	0.16482	10.31	778	0.04228	10.31	1138	0.09108
10.325	1147	0.08042	10.325	1101	0.07616	10.325	1232	0.12165	10.325	1417	0.16332	10.325	756	0.04109	10.325	1166	0.09332
10.34	1160	0.08133	10.34	1102	0.07623	10.34	1211	0.11958	10.34	1421	0.16379	10.34	776	0.04218	10.34	1113	0.08908
10.355	1185	0.08308	10.355	1094	0.07568	10.355	1180	0.11652	10.355	1382	0.15929	10.355	802	0.04359	10.355	1107	0.0886
10.37	1185	0.08308	10.37	1121	0.07755	10.37	1167	0.11524	10.37	1454	0.16759	10.37	817	0.0444	10.37	1161	0.09292
10.385	1106	0.07754	10.385	1107	0.07658	10.385	1216	0.12008	10.385	1433	0.16517	10.385	788	0.04283	10.385	1136	0.09092
10.4	1103	0.07733	10.4	1105	0.07644	10.4	1169	0.11543	10.4	1469	0.16932	10.4	795	0.04321	10.4	1145	0.09164
10.415	1133	0.07944	10.415	1137	0.07865	10.415	1183	0.11682	10.415	1468	0.1692	10.415	775	0.04212	10.415	1115	0.08924
10.43	1126	0.07895	10.43	1142	0.079	10.43	1193	0.1178	10.43	1499	0.17278	10.43	788	0.04283	10.43	1140	0.09124
10.445	1113	0.07803	10.445	1048	0.0725	10.445	1182	0.11672	10.445	1466	0.16897	10.445	800	0.04348	10.445	1147	0.0918
10.46	1147	0.08042	10.46	1072	0.07416	10.46	1217	0.12017	10.46	1401	0.16148	10.46	801	0.04353	10.46	1120	0.08964
10.475	1159	0.08126	10.475	1109	0.07672	10.475	1200	0.1185	10.475	1424	0.16413	10.475	798	0.04337	10.475	1103	0.08828
10.49	1203	0.08434	10.49	1100	0.07609	10.49	1128	0.11139	10.49	1414	0.16298	10.49	792	0.04305	10.49	1096	0.08772
10.505	1074	0.0753	10.505	1114	0.07706	10.505	1148	0.11336	10.505	1396	0.1609	10.505	792	0.04305	10.505	1158	0.09268
10.52	1096	0.07684	10.52	1057	0.07312	10.52	1162	0.11474	10.52	1450	0.16713	10.52	766	0.04163	10.52	1138	0.09108
10.535	1139	0.07986	10.535	1067	0.07381	10.535	1140	0.11257	10.535	1383	0.15941	10.535	810	0.04402	10.535	1134	0.09076
10.55	1128	0.07909	10.55	1031	0.07132	10.55	1103	0.10892	10.55	1304	0.1503	10.55	806	0.04381	10.55	1088	0.08707
10.565	1168	0.08189	10.565	1080	0.07471	10.565	1162	0.11474	10.565	1354	0.15606	10.565	816	0.04435	10.565	1144	0.09156
10.58	1073	0.07523	10.58	1061	0.0734	10.58	1127	0.11129	10.58	1383	0.15941	10.58	808	0.04392	10.58	1110	0.08884
10.595	1112	0.07796	10.595	1072	0.07416	10.595	1150	0.11356	10.595	1392	0.16044	10.595	798	0.04337	10.595	1102	0.0882
10.61	1085	0.07607	10.61	1115	0.07713	10.61	1142	0.11277	10.61	1389	0.1601	10.61	837	0.04549	10.61	1106	0.08852
10.625	1124	0.07881	10.625	1153	0.07976	10.625	1118	0.1104	10.625	1355	0.15618	10.625	794	0.04315	10.625	1042	0.08339
10.64	1116	0.07824	10.64	1108	0.07665	10.64	1112	0.10981	10.64	1390	0.16021	10.64	811	0.04408	10.64	1090	0.08723
10.655	1071	0.07509	10.655	1094	0.07568	10.655	1113	0.1099	10.655	1427	0.16448	10.655	799	0.04343	10.655	1051	0.08411
10.67	1090	0.07642	10.67	1104	0.07637	10.67	1042	0.10289	10.67	1365	0.15733	10.67	820	0.04457	10.67	1109	0.08876
10.685	1086	0.07614	10.685	1063	0.07353	10.685	1100	0.10862	10.685	1372	0.15814	10.685	739	0.04017	10.685	1129	0.09036
10.7	1071	0.07509	10.7	1050	0.07263	10.7	1120	0.1106	10.7	1316	0.15168	10.7	780	0.04239	10.7	1129	0.09036
10.715	1068	0.07488	10.715	1056	0.07305	10.715	1101	0.10872	10.715	1366	0.15745	10.715	771	0.0419	10.715	1053	0.08427
10.73	1035	0.07257	10.73	1087	0.07519	10.73	1082	0.10684	10.73	1365	0.15733	10.73	723	0.0393	10.73	1046	0.08371
10.745	1070	0.07502	10.745	1042	0.07208	10.745	1063	0.10497	10.745	1346	0.15514	10.745	784	0.04261	10.745	1114	0.08916
10.76	1076	0.07544	10.76	1058	0.07319	10.76	1144	0.11297	10.76	1341	0.15456	10.76	781	0.04245	10.76	1087	0.08699
10.775	1066	0.07474	10.775	1067	0.07381	10.775	1145	0.11306	10.775	1302	0.15007	10.775	780	0.04239	10.775	1059	0.08475
10.79	1106	0.07754	10.79	1087	0.07519	10.79	1081	0.10674	10.79	1378	0.15883	10.79	796	0.04326	10.79	1084	0.08675
10.805	1064	0.0746	10.805	1078	0.07457	10.805	1092	0.10783	10.805	1382	0.15929	10.805	821	0.04462	10.805	1057	0.08459
10.82	1040	0.07292	10.82	1028	0.07111	10.82	1109	0.10951	10.82	1373	0.15825	10.82	790	0.04294	10.82	1027	0.08219
10.835	1018	0.07137	10.835	1022	0.0707	10.835	1117	0.1103	10.835	1363	0.1571	10.835	749	0.04071	10.835	1049	0.08395
10.85	1075	0.07537	10.85	1028	0.07111	10.85	1075	0.10615	10.85	1319	0.15203	10.85	790	0.04294	10.85	1040	0.08323
10.865	1053	0.07383	10.865	1046	0.07236	10.865	1071	0.10576	10.865	1325	0.15272	10.865	815	0.0443	10.865	1110	0.08884
10.88	1038	0.07278	10.88	1050	0.07263	10.88	1105	0.10911	10.88	1303	0.15018	10.88	767	0.04169	10.88	1036	0.08291
10.895	1030	0.07221	10.895	1072	0.07416	10.895	1113	0.1099	10.895	1333	0.15364	10.895	756	0.04109	10.895	1064	0.08515
10.91	1060	0.07432	10.91	1060	0.07333	10.91	1081	0.10674	10.91	1293	0.14903	10.91	794	0.04315	10.91	1034	0.08275
10.925	1085	0.07607	10.925	1036	0.07167	10.925	1021	0.10082	10.925	1279	0.14742	10.925	769	0.0418	10.925	1080	0.08643
10.94	1074	0.0753	10.94	1021	0.07063	10.94	1051	0.10378	10.94	1339	0.15433	10.94	787	0.04277	10.94	1050	0.08403
10.955	1021	0.07158	10.955	1025	0.0709	10.955	1051	0.10378	10.955	1281	0.14765	10.955	796	0.04326	10.955	1034	0.08275
10.97	990	0.06941	10.97	1069	0.07395	10.97	1111	0.10971	10.97	1250	0.14408	10.97	778	0.04228	10.97	1035	0.08283
10.985	977	0.0685	10.985	995	0.06883	10.985	1073	0.10595	10.985	1251	0.14419	10.985	759	0.04125	10.985	1046	0.08371
11	1043	0.07313	11	983	0.068	11	1084	0.10704	11	1279	0.14742	11	778	0.04228	11	1035	0.08283
11.015	988	0.06927	11.015	1019	0.07049	11.015	1070	0.10566	11.015	1303	0.15018	11.015	785	0.04267	11.015	1039	0.08315
11.03	1024	0.07179	11.03	1044	0.07222	11.03	1040	0.1027	11.03	1212	0.1397	11.03	771	0.0419	11.03	1052	0.08419
11.045	957	0.0671	11.045	996	0.0689	11.045	1034	0.1021	11.045	1218	0.14039	11.045	741	0.04027	11.045	942	0.07539
11.06	993	0.06962	11.06	991	0.06855	11.06	993	0.09805	11.06	1219	0.1405	11.06	737	0.04006	11.06	993	0.07947
11.075	1007	0.0706	11.075	989	0.06841	11.075	997	0.09845	11.075	1230	0.14177	11.075	796	0.04326	11.075	975	0.07803
11.09	988	0.06927	11.09	980	0.06779	11.09	976	0.09638	11.09	1174	0.13532	11.09	755	0.04103	11.09	968	0.07747
11.105	1000	0.07011	11.105	948	0.06558	11.105	957	0.0945	11.105	1210	0.13947	11.105	764	0.04152	11.105	980	0.07843
11.12	1021	0.07158	11.12	973	0.06731	11.12	1019	0.10062	11.12	1203	0.13866	11.12	759	0.04125	11.12	1005	0.08043
11.135	952	0.06675	11.135	931	0.0644	11.135	974	0.09618	11.135	1199	0.1382	11.135	765	0.04158	11.135	963	0.07707
11.15	944	0.06619	11.15	957	0.0662	11.15	1008	0.09954	11.15	1226	0.14131	11.15	817	0.0444	11.15	968	0.07747
11.165	995	0.06976	11.165	938	0.06489	11.165	989	0.09766	11.165	1186	0.1367	11.165	788	0.04283	11.165	976	0.07811
11.18	956	0.06703	11.18	928	0.06419	11.18	975	0.09628	11.18	1207	0.13912	11.18	772	0.04196	11.18	926	0.07411
11.195	979	0.06864	11.195	933	0.06454	11.195	960	0.0948	11.195	1181	0.13612	11.195	704	0.03826	11.195	987	0.07899
11.21	1030	0.07221	11.21	909	0.06288	11.21	971	0.09588	11.21	1161	0.13382	11.21	778	0.04228	11.21	968	0.07747
11.225	1017	0.0713	11.225	944	0.0653	11.225	968	0.09559	11.225	1214	0.13993	11.225	777	0.04223	11.225	971	0.07771
11.24	989	0.06934	11.24	927	0.06413	11.24	979	0.09667	11.24	1122	0.12932	11.24	725	0.0394	11.24	947	0.07579
11.255	959	0.06724	11.255	931	0.0644	11.255	977	0.09647	11.255	1140	0.1314	11.255	709	0.03853	11.255	935	0.07483
11.27	992	0.06955	11.27	924	0.06392	11.27	949	0.09371	11.27	1162	0.13393	11.27	790	0.04294	11.27	912	0.07299
11.285	980	0.06871	11.285	949	0.06565	11.285	938	0.09262	11.285	1130	0.13024	11.285	739	0.04017	11.285	921	0.07371
11.3	926	0.06492	11.3	978	0.06765	11.3	905	0.08937	11.3	1143	0.13174	11.3	711	0.03864	11.3	875	0.07003
11.315	949	0.06654	11.315	873	0.06039	11.315	994	0.09815	11.315	1160	0.1337	11.315	740	0.04022	11.315	910	0.07283
11.33	959	0.06724	11.33	896	0.06198	11.33	932	0.09203	11.33	1177	0.13566	11.33	735	0.03995	11.33	958	0.07667
11.345	934	0.06548	11.345	944	0.0653	11.345	929	0.09173	11.345	1133	0.13059	11.345	786	0.04272	11.345	923	0.07387
11.36	1004	0.07039	11.36	916	0.06336	11.36	923	0.09114	11.36	1131	0.13036	11.36	770	0.04185	11.36	881	0.07051
11.375	919	0.06443	11.375	928	0.06419	11.375	980	0.09677	11.375	1210	0.13947	11.375	717	0.03897	11.375	926	0.07411
11.39	925	0.06485	11.39	912	0.06309	11.39	968	0.09559	11.39	1123	0.12944	11.39	746	0.04055	11.39	951	0.07611
11.405	943	0.06612	11.405	904	0.06253	11.405	881	0.087	11.405	1096	0.12633	11.405	741	0.04027	11.405	882	0.07059
11.42	953	0.06682	11.42	954	0.06599	11.42	926	0.09144	11.42	1141	0.13151	11.42	736	0.04	11.42	903	0.07227
11.435	986	0.06913	11.435	888	0.06143	11.435	920	0.09085	11.435	1153	0.1329	11.435	722	0.03924	11.435	891	0.07131
11.45	935	0.06555	11.45	884	0.06115	11.45	967	0.09549	11.45	1108	0.12771	11.45	741	0.04027	11.45	914	0.07315
11.465	914	0.06408	11.465	915	0.0633	11.465	921	0.09094	11.465	1092	0.12586	11.465	725	0.0394	11.465	902	0.07219
11.48	874	0.06128	11.48	915	0.0633	11.48	912	0.09006	11.48	1101	0.1269	11.48	718	0.03902	11.48	902	0.07219
11.495	878	0.06156	11.495	889	0.0615	11.495	876	0.0865	11.495	1135	0.13082	11.495	750	0.04076	11.495	922	0.07379
11.51	880	0.0617	11.51	920	0.06364	11.51	891	0.08798	11.51	1087	0.12529	11.51	738	0.04011	11.51	834	0.06675
11.525	916	0.06422	11.525	866	0.05991	11.525	939	0.09272	11.525	1076	0.12402	11.525	729	0.03962	11.525	889	0.07115
11.54	969	0.06794	11.54	916	0.06336	11.54	923	0.09114	11.54	1036	0.11941	11.54	738	0.04011	11.54	908	0.07267
11.555	931	0.06527	11.555	902	0.0624	11.555	895	0.08838	11.555	1093	0.12598	11.555	781	0.04245	11.555	893	0.07147
11.57	890	0.0624	11.57	875	0.06053	11.57	917	0.09055	11.57	1134	0.13071	11.57	770	0.04185	11.57	866	0.06931
11.585	890	0.0624	11.585	841	0.05818	11.585	894	0.08828	11.585	1110	0.12794	11.585	782	0.0425	11.585	857	0.06859
11.6	891	0.06247	11.6	886	0.06129	11.6	892	0.08808	11.6	1145	0.13197	11.6	762	0.04142	11.6	843	0.06747
11.615	887	0.06219	11.615	872	0.06032	11.615	933	0.09213	11.615	1102	0.12702	11.615	775	0.04212	11.615	868	0.06947
11.63	854	0.05988	11.63	850	0.0588	11.63	909	0.08976	11.63	1081	0.1246	11.63	778	0.04228	11.63	886	0.07091
11.645	860	0.0603	11.645	867	0.05998	11.645	876	0.0865	11.645	1093	0.12598	11.645	757	0.04114	11.645	884	0.07075
11.66	855	0.05995	11.66	819	0.05665	11.66	866	0.08551	11.66	1066	0.12287	11.66	759	0.04125	11.66	884	0.07075
11.675	883	0.06191	11.675	815	0.05638	11.675	903	0.08917	11.675	1044	0.12033	11.675	738	0.04011	11.675	860	0.06883
11.69	887	0.06219	11.69	875	0.06053	11.69	881	0.087	11.69	1008	0.11618	11.69	745	0.04049	11.69	866	0.06931
11.705	890	0.0624	11.705	897	0.06205	11.705	875	0.0864	11.705	1030	0.11872	11.705	744	0.04044	11.705	891	0.07131
11.72	854	0.05988	11.72	820	0.05672	11.72	889	0.08779	11.72	1069	0.12321	11.72	723	0.0393	11.72	868	0.06947
11.735	846	0.05931	11.735	830	0.05742	11.735	874	0.0863	11.735	1076	0.12402	11.735	736	0.04	11.735	869	0.06955
11.75	854	0.05988	11.75	855	0.05914	11.75	861	0.08502	11.75	1030	0.11872	11.75	740	0.04022	11.75	842	0.06739
11.765	881	0.06177	11.765	810	0.05603	11.765	818	0.08077	11.765	1064	0.12264	11.765	731	0.03973	11.765	883	0.07067
11.78	856	0.06002	11.78	881	0.06094	11.78	928	0.09164	11.78	1043	0.12022	11.78	763	0.04147	11.78	853	0.06827
11.795	827	0.05798	11.795	898	0.06212	11.795	850	0.08393	11.795	1093	0.12598	11.795	736	0.04	11.795	855	0.06843
11.81	859	0.06023	11.81	850	0.0588	11.81	838	0.08275	11.81	983	0.1133	11.81	703	0.03821	11.81	852	0.06819
11.825	846	0.05931	11.825	836	0.05783	11.825	842	0.08314	11.825	976	0.11249	11.825	761	0.04136	11.825	831	0.06651
11.84	856	0.06002	11.84	825	0.05707	11.84	824	0.08137	11.84	1016	0.1171	11.84	738	0.04011	11.84	859	0.06875
11.855	835	0.05854	11.855	841	0.05818	11.855	873	0.08621	11.855	1038	0.11964	11.855	715	0.03886	11.855	816	0.06531
11.87	854	0.05988	11.87	836	0.05783	11.87	886	0.08749	11.87	1011	0.11653	11.87	694	0.03772	11.87	828	0.06627
11.885	880	0.0617	11.885	829	0.05735	11.885	857	0.08463	11.885	961	0.11077	11.885	739	0.04017	11.885	856	0.06851
11.9	865	0.06065	11.9	889	0.0615	11.9	819	0.08087	11.9	1015	0.11699	11.9	728	0.03957	11.9	836	0.06691
11.915	866	0.06072	11.915	815	0.05638	11.915	827	0.08166	11.915	1024	0.11803	11.915	718	0.03902	11.915	833	0.06667
11.93	898	0.06296	11.93	844	0.05838	11.93	854	0.08433	11.93	976	0.11249	11.93	736	0.04	11.93	882	0.07059
11.945	832	0.05833	11.945	812	0.05617	11.945	874	0.0863	11.945	1020	0.11757	11.945	711	0.03864	11.945	876	0.07011
11.96	809	0.05672	11.96	850	0.0588	11.96	840	0.08295	11.96	1000	0.11526	11.96	736	0.04	11.96	861	0.06891
11.975	841	0.05896	11.975	834	0.05769	11.975	897	0.08858	11.975	996	0.1148	11.975	763	0.04147	11.975	853	0.06827
11.99	833	0.0584	11.99	798	0.0552	11.99	851	0.08403	11.99	987	0.11376	11.99	730	0.03968	11.99	755	0.06042
12.005	821	0.05756	12.005	793	0.05486	12.005	875	0.0864	12.005	964	0.11111	12.005	709	0.03853	12.005	790	0.06323
12.02	778	0.05455	12.02	811	0.0561	12.02	861	0.08502	12.02	998	0.11503	12.02	796	0.04326	12.02	807	0.06459
12.035	807	0.05658	12.035	787	0.05444	12.035	817	0.08068	12.035	1048	0.12079	12.035	720	0.03913	12.035	835	0.06683
12.05	807	0.05658	12.05	741	0.05126	12.05	798	0.0788	12.05	972	0.11203	12.05	693	0.03767	12.05	814	0.06515
12.065	821	0.05756	12.065	717	0.0496	12.065	785	0.07752	12.065	950	0.1095	12.065	720	0.03913	12.065	772	0.06178
12.08	761	0.05335	12.08	747	0.05167	12.08	819	0.08087	12.08	987	0.11376	12.08	709	0.03853	12.08	752	0.06018
12.095	779	0.05462	12.095	777	0.05375	12.095	827	0.08166	12.095	956	0.11019	12.095	713	0.03875	12.095	804	0.06435
12.11	790	0.05539	12.11	753	0.05209	12.11	805	0.07949	12.11	907	0.10454	12.11	725	0.0394	12.11	756	0.0605
12.125	798	0.05595	12.125	732	0.05064	12.125	758	0.07485	12.125	924	0.1065	12.125	717	0.03897	12.125	792	0.06339
12.14	803	0.0563	12.14	722	0.04994	12.14	790	0.07801	12.14	938	0.10811	12.14	738	0.04011	12.14	786	0.06291
12.155	751	0.05265	12.155	738	0.05105	12.155	802	0.07919	12.155	942	0.10858	12.155	674	0.03663	12.155	764	0.06114
12.17	784	0.05497	12.17	767	0.05306	12.17	778	0.07682	12.17	932	0.10742	12.17	703	0.03821	12.17	783	0.06267
12.185	795	0.05574	12.185	777	0.05375	12.185	797	0.0787	12.185	943	0.10869	12.185	700	0.03805	12.185	767	0.06138
12.2	814	0.05707	12.2	761	0.05264	12.2	784	0.07742	12.2	954	0.10996	12.2	754	0.04098	12.2	802	0.06419
12.215	793	0.0556	12.215	735	0.05084	12.215	792	0.07821	12.215	972	0.11203	12.215	726	0.03946	12.215	802	0.06419
12.23	769	0.05392	12.23	774	0.05354	12.23	768	0.07584	12.23	946	0.10904	12.23	732	0.03978	12.23	790	0.06323
12.245	800	0.05609	12.245	772	0.0534	12.245	743	0.07337	12.245	924	0.1065	12.245	677	0.0368	12.245	739	0.05914
12.26	778	0.05455	12.26	749	0.05181	12.26	785	0.07752	12.26	945	0.10892	12.26	730	0.03968	12.26	735	0.05882
12.275	788	0.05525	12.275	760	0.05257	12.275	773	0.07633	12.275	929	0.10708	12.275	705	0.03832	12.275	733	0.05866
12.29	785	0.05504	12.29	725	0.05015	12.29	765	0.07554	12.29	935	0.10777	12.29	702	0.03815	12.29	790	0.06323
12.305	756	0.053	12.305	801	0.05541	12.305	759	0.07495	12.305	940	0.10834	12.305	696	0.03783	12.305	777	0.06218
12.32	774	0.05427	12.32	770	0.05327	12.32	775	0.07653	12.32	934	0.10765	12.32	731	0.03973	12.32	768	0.06146
12.335	752	0.05272	12.335	720	0.04981	12.335	765	0.07554	12.335	941	0.10846	12.335	720	0.03913	12.335	769	0.06154
12.35	744	0.05216	12.35	787	0.05444	12.35	732	0.07228	12.35	899	0.10362	12.35	691	0.03756	12.35	764	0.06114
12.365	758	0.05314	12.365	705	0.04877	12.365	740	0.07307	12.365	908	0.10466	12.365	707	0.03843	12.365	745	0.05962
12.38	750	0.05258	12.38	728	0.05036	12.38	723	0.07139	12.38	905	0.10431	12.38	692	0.03761	12.38	741	0.0593
12.395	780	0.05469	12.395	716	0.04953	12.395	767	0.07574	12.395	867	0.09993	12.395	716	0.03892	12.395	747	0.05978
12.41	784	0.05497	12.41	737	0.05098	12.41	731	0.07218	12.41	909	0.10477	12.41	695	0.03777	12.41	746	0.0597
12.425	752	0.05272	12.425	729	0.05043	12.425	774	0.07643	12.425	913	0.10523	12.425	706	0.03837	12.425	795	0.06363
12.44	738	0.05174	12.44	758	0.05243	12.44	759	0.07495	12.44	845	0.0974	12.44	745	0.04049	12.44	712	0.05698
12.455	756	0.053	12.455	748	0.05174	12.455	739	0.07297	12.455	896	0.10327	12.455	679	0.0369	12.455	708	0.05666
12.47	748	0.05244	12.47	720	0.04981	12.47	731	0.07218	12.47	856	0.09866	12.47	692	0.03761	12.47	702	0.05618
12.485	766	0.05371	12.485	752	0.05202	12.485	716	0.0707	12.485	862	0.09935	12.485	720	0.03913	12.485	731	0.0585
12.5	774	0.05427	12.5	734	0.05077	12.5	763	0.07534	12.5	909	0.10477	12.5	703	0.03821	12.5	731	0.0585
12.515	778	0.05455	12.515	747	0.05167	12.515	770	0.07603	12.515	920	0.10604	12.515	707	0.03843	12.515	768	0.06146
12.53	741	0.05195	12.53	741	0.05126	12.53	731	0.07218	12.53	892	0.10281	12.53	666	0.0362	12.53	732	0.05858
12.545	746	0.0523	12.545	776	0.05368	12.545	748	0.07386	12.545	865	0.0997	12.545	696	0.03783	12.545	739	0.05914
12.56	715	0.05013	12.56	775	0.05361	12.56	759	0.07495	12.56	846	0.09751	12.56	694	0.03772	12.56	745	0.05962
12.575	787	0.05518	12.575	753	0.05209	12.575	743	0.07337	12.575	881	0.10154	12.575	710	0.03859	12.575	772	0.06178
12.59	757	0.05307	12.59	720	0.04981	12.59	702	0.06932	12.59	852	0.0982	12.59	709	0.03853	12.59	711	0.0569
12.605	731	0.05125	12.605	756	0.0523	12.605	718	0.0709	12.605	886	0.10212	12.605	720	0.03913	12.605	723	0.05786
12.62	717	0.05027	12.62	706	0.04884	12.62	730	0.07208	12.62	877	0.10108	12.62	681	0.03701	12.62	721	0.0577
12.635	733	0.05139	12.635	715	0.04946	12.635	682	0.06734	12.635	892	0.10281	12.635	696	0.03783	12.635	727	0.05818
12.65	758	0.05314	12.65	727	0.05029	12.65	742	0.07327	12.65	895	0.10316	12.65	694	0.03772	12.65	706	0.0565
12.665	740	0.05188	12.665	707	0.04891	12.665	756	0.07465	12.665	843	0.09716	12.665	689	0.03745	12.665	727	0.05818
12.68	758	0.05314	12.68	696	0.04815	12.68	740	0.07307	12.68	869	0.10016	12.68	661	0.03593	12.68	739	0.05914
12.695	746	0.0523	12.695	686	0.04745	12.695	708	0.06991	12.695	832	0.0959	12.695	678	0.03685	12.695	722	0.05778
12.71	759	0.05321	12.71	727	0.05029	12.71	715	0.0706	12.71	861	0.09924	12.71	679	0.0369	12.71	694	0.05554
12.725	782	0.05483	12.725	704	0.0487	12.725	697	0.06883	12.725	810	0.09336	12.725	629	0.03419	12.725	690	0.05522
12.74	767	0.05378	12.74	714	0.04939	12.74	752	0.07426	12.74	816	0.09405	12.74	665	0.03614	12.74	715	0.05722
12.755	774	0.05427	12.755	703	0.04863	12.755	730	0.07208	12.755	837	0.09647	12.755	679	0.0369	12.755	709	0.05674
12.77	731	0.05125	12.77	750	0.05188	12.77	723	0.07139	12.77	828	0.09544	12.77	667	0.03625	12.77	713	0.05706
12.785	760	0.05328	12.785	708	0.04898	12.785	721	0.0712	12.785	831	0.09578	12.785	687	0.03734	12.785	700	0.05602
12.8	731	0.05125	12.8	703	0.04863	12.8	723	0.07139	12.8	845	0.0974	12.8	679	0.0369	12.8	656	0.0525
12.815	768	0.05385	12.815	672	0.04649	12.815	704	0.06952	12.815	806	0.0929	12.815	665	0.03614	12.815	694	0.05554
12.83	756	0.053	12.83	651	0.04503	12.83	703	0.06942	12.83	864	0.09959	12.83	734	0.03989	12.83	690	0.05522
12.845	727	0.05097	12.845	677	0.04683	12.845	680	0.06715	12.845	859	0.09901	12.845	717	0.03897	12.845	641	0.0513
12.86	717	0.05027	12.86	703	0.04863	12.86	653	0.06448	12.86	842	0.09705	12.86	673	0.03658	12.86	679	0.05434
12.875	682	0.04782	12.875	739	0.05112	12.875	658	0.06497	12.875	820	0.09451	12.875	666	0.0362	12.875	744	0.05954
12.89	717	0.05027	12.89	705	0.04877	12.89	690	0.06813	12.89	801	0.09232	12.89	675	0.03669	12.89	699	0.05594
12.905	713	0.04999	12.905	755	0.05223	12.905	735	0.07258	12.905	804	0.09267	12.905	654	0.03555	12.905	729	0.05834
12.92	725	0.05083	12.92	741	0.05126	12.92	700	0.06912	12.92	816	0.09405	12.92	707	0.03843	12.92	755	0.06042
12.935	716	0.0502	12.935	693	0.04794	12.935	676	0.06675	12.935	824	0.09497	12.935	717	0.03897	12.935	735	0.05882
12.95	733	0.05139	12.95	664	0.04593	12.95	671	0.06626	12.95	868	0.10005	12.95	688	0.03739	12.95	705	0.05642
12.965	745	0.05223	12.965	670	0.04635	12.965	675	0.06665	12.965	896	0.10327	12.965	651	0.03538	12.965	719	0.05754
12.98	721	0.05055	12.98	670	0.04635	12.98	692	0.06833	12.98	856	0.09866	12.98	646	0.03511	12.98	697	0.05578
12.995	730	0.05118	12.995	687	0.04752	12.995	667	0.06586	12.995	872	0.10051	12.995	677	0.0368	12.995	672	0.05378
13.01	716	0.0502	13.01	632	0.04372	13.01	719	0.071	13.01	862	0.09935	13.01	662	0.03598	13.01	695	0.05562
13.025	770	0.05399	13.025	685	0.04739	13.025	690	0.06813	13.025	790	0.09106	13.025	696	0.03783	13.025	686	0.0549
13.04	701	0.04915	13.04	684	0.04732	13.04	682	0.06734	13.04	830	0.09567	13.04	681	0.03701	13.04	716	0.0573
13.055	703	0.04929	13.055	678	0.0469	13.055	649	0.06409	13.055	763	0.08794	13.055	646	0.03511	13.055	683	0.05466
13.07	695	0.04873	13.07	679	0.04697	13.07	682	0.06734	13.07	753	0.08679	13.07	640	0.03478	13.07	630	0.05042
13.085	720	0.05048	13.085	638	0.04413	13.085	677	0.06685	13.085	750	0.08645	13.085	658	0.03576	13.085	657	0.05258
13.1	694	0.04866	13.1	653	0.04517	13.1	629	0.06211	13.1	742	0.08552	13.1	613	0.03332	13.1	678	0.05426
13.115	694	0.04866	13.115	636	0.044	13.115	637	0.0629	13.115	737	0.08495	13.115	620	0.0337	13.115	665	0.05322
13.13	715	0.05013	13.13	671	0.04642	13.13	686	0.06774	13.13	731	0.08426	13.13	678	0.03685	13.13	614	0.04914
13.145	713	0.04999	13.145	656	0.04538	13.145	658	0.06497	13.145	735	0.08472	13.145	694	0.03772	13.145	655	0.05242
13.16	661	0.04634	13.16	694	0.04801	13.16	663	0.06547	13.16	792	0.09129	13.16	642	0.03489	13.16	688	0.05506
13.175	665	0.04662	13.175	662	0.04579	13.175	678	0.06695	13.175	725	0.08356	13.175	650	0.03533	13.175	653	0.05226
13.19	662	0.04641	13.19	624	0.04317	13.19	654	0.06458	13.19	780	0.0899	13.19	667	0.03625	13.19	637	0.05098
13.205	643	0.04508	13.205	674	0.04662	13.205	680	0.06715	13.205	804	0.09267	13.205	661	0.03593	13.205	680	0.05442
13.22	673	0.04719	13.22	629	0.04351	13.22	692	0.06833	13.22	736	0.08483	13.22	661	0.03593	13.22	677	0.05418
13.235	651	0.04564	13.235	671	0.04642	13.235	636	0.0628	13.235	735	0.08472	13.235	672	0.03652	13.235	634	0.05074
13.25	676	0.0474	13.25	632	0.04372	13.25	659	0.06507	13.25	758	0.08737	13.25	678	0.03685	13.25	659	0.05274
13.265	667	0.04676	13.265	667	0.04614	13.265	652	0.06438	13.265	764	0.08806	13.265	642	0.03489	13.265	631	0.0505
13.28	675	0.04733	13.28	715	0.04946	13.28	644	0.06359	13.28	744	0.08575	13.28	655	0.0356	13.28	618	0.04946
13.295	658	0.04613	13.295	625	0.04323	13.295	644	0.06359	13.295	760	0.0876	13.295	694	0.03772	13.295	671	0.0537
13.31	650	0.04557	13.31	653	0.04517	13.31	649	0.06409	13.31	762	0.08783	13.31	648	0.03522	13.31	670	0.05362
13.325	660	0.04627	13.325	626	0.0433	13.325	652	0.06438	13.325	730	0.08414	13.325	615	0.03343	13.325	638	0.05106
13.34	654	0.04585	13.34	642	0.04441	13.34	653	0.06448	13.34	773	0.0891	13.34	653	0.03549	13.34	645	0.05162
13.355	694	0.04866	13.355	657	0.04545	13.355	634	0.0626	13.355	737	0.08495	13.355	676	0.03674	13.355	670	0.05362
13.37	630	0.04417	13.37	643	0.04448	13.37	650	0.06418	13.37	702	0.08091	13.37	624	0.03391	13.37	658	0.05266
13.385	643	0.04508	13.385	652	0.0451	13.385	672	0.06636	13.385	755	0.08702	13.385	647	0.03516	13.385	672	0.05378
13.4	662	0.04641	13.4	637	0.04406	13.4	644	0.06359	13.4	772	0.08898	13.4	634	0.03446	13.4	668	0.05346
13.415	684	0.04796	13.415	662	0.04579	13.415	643	0.06349	13.415	772	0.08898	13.415	626	0.03402	13.415	619	0.04954
13.43	655	0.04592	13.43	603	0.04171	13.43	661	0.06527	13.43	733	0.08449	13.43	600	0.03261	13.43	642	0.05138
13.445	674	0.04726	13.445	656	0.04538	13.445	619	0.06112	13.445	770	0.08875	13.445	630	0.03424	13.445	662	0.05298
13.46	714	0.05006	13.46	674	0.04662	13.46	659	0.06507	13.46	714	0.0823	13.46	620	0.0337	13.46	678	0.05426
13.475	666	0.04669	13.475	621	0.04296	13.475	627	0.06191	13.475	724	0.08345	13.475	641	0.03484	13.475	663	0.05306
13.49	632	0.04431	13.49	642	0.04441	13.49	625	0.06172	13.49	758	0.08737	13.49	620	0.0337	13.49	666	0.0533
13.505	671	0.04704	13.505	652	0.0451	13.505	614	0.06063	13.505	784	0.09036	13.505	658	0.03576	13.505	642	0.05138
13.52	705	0.04943	13.52	673	0.04656	13.52	630	0.06221	13.52	748	0.08621	13.52	670	0.03642	13.52	643	0.05146
13.535	641	0.04494	13.535	643	0.04448	13.535	652	0.06438	13.535	752	0.08668	13.535	650	0.03533	13.535	614	0.04914
13.55	651	0.04564	13.55	644	0.04455	13.55	648	0.06399	13.55	771	0.08887	13.55	684	0.03718	13.55	645	0.05162
13.565	676	0.0474	13.565	627	0.04337	13.565	655	0.06468	13.565	713	0.08218	13.565	612	0.03326	13.565	645	0.05162
13.58	647	0.04536	13.58	620	0.04289	13.58	632	0.06241	13.58	744	0.08575	13.58	616	0.03348	13.58	623	0.04986
13.595	619	0.0434	13.595	603	0.04171	13.595	646	0.06379	13.595	736	0.08483	13.595	620	0.0337	13.595	622	0.04978
13.61	668	0.04683	13.61	625	0.04323	13.61	615	0.06073	13.61	742	0.08552	13.61	623	0.03386	13.61	612	0.04898
13.625	634	0.04445	13.625	603	0.04171	13.625	624	0.06162	13.625	757	0.08725	13.625	632	0.03435	13.625	596	0.0477
13.64	626	0.04389	13.64	646	0.04469	13.64	628	0.06201	13.64	732	0.08437	13.64	676	0.03674	13.64	626	0.0501
13.655	617	0.04326	13.655	644	0.04455	13.655	622	0.06142	13.655	735	0.08472	13.655	637	0.03462	13.655	678	0.05426
13.67	624	0.04375	13.67	600	0.04151	13.67	618	0.06102	13.67	734	0.0846	13.67	628	0.03413	13.67	648	0.05186
13.685	671	0.04704	13.685	656	0.04538	13.685	613	0.06053	13.685	709	0.08172	13.685	625	0.03397	13.685	616	0.0493
13.7	661	0.04634	13.7	595	0.04116	13.7	671	0.06626	13.7	698	0.08045	13.7	631	0.0343	13.7	642	0.05138
13.715	637	0.04466	13.715	616	0.04261	13.715	655	0.06468	13.715	728	0.08391	13.715	642	0.03489	13.715	635	0.05082
13.73	604	0.04235	13.73	615	0.04254	13.73	646	0.06379	13.73	721	0.0831	13.73	640	0.03478	13.73	641	0.0513
13.745	630	0.04417	13.745	614	0.04247	13.745	601	0.05935	13.745	689	0.07941	13.745	648	0.03522	13.745	652	0.05218
13.76	631	0.04424	13.76	647	0.04476	13.76	608	0.06004	13.76	709	0.08172	13.76	644	0.035	13.76	625	0.05002
13.775	676	0.0474	13.775	614	0.04247	13.775	580	0.05727	13.775	744	0.08575	13.775	635	0.03451	13.775	614	0.04914
13.79	622	0.04361	13.79	637	0.04406	13.79	579	0.05717	13.79	739	0.08518	13.79	645	0.03506	13.79	613	0.04906
13.805	636	0.04459	13.805	606	0.04192	13.805	642	0.06339	13.805	688	0.0793	13.805	578	0.03141	13.805	601	0.0481
13.82	646	0.04529	13.82	603	0.04171	13.82	597	0.05895	13.82	685	0.07895	13.82	605	0.03288	13.82	682	0.05458
13.835	635	0.04452	13.835	638	0.04413	13.835	596	0.05885	13.835	702	0.08091	13.835	625	0.03397	13.835	628	0.05026
13.85	641	0.04494	13.85	582	0.04026	13.85	632	0.06241	13.85	660	0.07607	13.85	625	0.03397	13.85	588	0.04706
13.865	649	0.0455	13.865	648	0.04483	13.865	642	0.06339	13.865	700	0.08068	13.865	597	0.03245	13.865	653	0.05226
13.88	607	0.04256	13.88	666	0.04607	13.88	613	0.06053	13.88	700	0.08068	13.88	626	0.03402	13.88	609	0.04874
13.895	638	0.04473	13.895	630	0.04358	13.895	634	0.0626	13.895	708	0.0816	13.895	614	0.03337	13.895	583	0.04666
13.91	661	0.04634	13.91	644	0.04455	13.91	633	0.06251	13.91	712	0.08207	13.91	636	0.03457	13.91	630	0.05042
13.925	646	0.04529	13.925	651	0.04503	13.925	603	0.05954	13.925	743	0.08564	13.925	591	0.03212	13.925	642	0.05138
13.94	622	0.04361	13.94	639	0.0442	13.94	601	0.05935	13.94	696	0.08022	13.94	609	0.0331	13.94	659	0.05274
13.955	626	0.04389	13.955	638	0.04413	13.955	628	0.06201	13.955	700	0.08068	13.955	623	0.03386	13.955	615	0.04922
13.97	636	0.04459	13.97	616	0.04261	13.97	618	0.06102	13.97	678	0.07815	13.97	632	0.03435	13.97	617	0.04938
13.985	644	0.04515	13.985	655	0.04531	13.985	607	0.05994	13.985	701	0.0808	13.985	594	0.03228	13.985	614	0.04914
14	600	0.04207	14	589	0.04074	14	609	0.06014	14	724	0.08345	14	600	0.03261	14	573	0.04586
14.015	634	0.04445	14.015	603	0.04171	14.015	622	0.06142	14.015	740	0.08529	14.015	595	0.03234	14.015	631	0.0505
14.03	605	0.04242	14.03	623	0.0431	14.03	647	0.06389	14.03	704	0.08114	14.03	595	0.03234	14.03	576	0.0461
14.045	630	0.04417	14.045	601	0.04157	14.045	631	0.06231	14.045	706	0.08137	14.045	581	0.03158	14.045	603	0.04826
14.06	584	0.04095	14.06	584	0.0404	14.06	610	0.06024	14.06	683	0.07872	14.06	584	0.03174	14.06	573	0.04586
14.075	628	0.04403	14.075	591	0.04088	14.075	616	0.06083	14.075	661	0.07619	14.075	615	0.03343	14.075	588	0.04706
14.09	629	0.0441	14.09	607	0.04199	14.09	613	0.06053	14.09	652	0.07515	14.09	673	0.03658	14.09	611	0.0489
14.105	627	0.04396	14.105	600	0.04151	14.105	632	0.06241	14.105	713	0.08218	14.105	606	0.03294	14.105	626	0.0501
14.12	623	0.04368	14.12	562	0.03888	14.12	591	0.05836	14.12	693	0.07988	14.12	625	0.03397	14.12	608	0.04866
14.135	615	0.04312	14.135	584	0.0404	14.135	588	0.05806	14.135	677	0.07803	14.135	612	0.03326	14.135	574	0.04594
14.15	594	0.04165	14.15	613	0.0424	14.15	580	0.05727	14.15	666	0.07676	14.15	587	0.0319	14.15	635	0.05082
14.165	601	0.04214	14.165	603	0.04171	14.165	559	0.0552	14.165	724	0.08345	14.165	590	0.03207	14.165	585	0.04682
14.18	612	0.04291	14.18	619	0.04282	14.18	599	0.05915	14.18	669	0.07711	14.18	564	0.03065	14.18	579	0.04634
14.195	644	0.04515	14.195	623	0.0431	14.195	601	0.05935	14.195	674	0.07769	14.195	611	0.03321	14.195	602	0.04818
14.21	630	0.04417	14.21	609	0.04213	14.21	605	0.05974	14.21	630	0.07261	14.21	590	0.03207	14.21	564	0.04514
14.225	618	0.04333	14.225	574	0.03971	14.225	645	0.06369	14.225	660	0.07607	14.225	600	0.03261	14.225	609	0.04874
14.24	601	0.04214	14.24	604	0.04178	14.24	622	0.06142	14.24	698	0.08045	14.24	604	0.03283	14.24	555	0.04442
14.255	630	0.04417	14.255	596	0.04123	14.255	596	0.05885	14.255	621	0.07158	14.255	541	0.0294	14.255	599	0.04794
14.27	611	0.04284	14.27	580	0.04012	14.27	595	0.05875	14.27	662	0.0763	14.27	540	0.02935	14.27	573	0.04586
14.285	596	0.04179	14.285	624	0.04317	14.285	597	0.05895	14.285	694	0.07999	14.285	578	0.03141	14.285	557	0.04458
14.3	572	0.0401	14.3	610	0.0422	14.3	581	0.05737	14.3	700	0.08068	14.3	536	0.02913	14.3	574	0.04594
14.315	607	0.04256	14.315	591	0.04088	14.315	587	0.05796	14.315	708	0.0816	14.315	566	0.03076	14.315	562	0.04498
14.33	612	0.04291	14.33	584	0.0404	14.33	607	0.05994	14.33	690	0.07953	14.33	591	0.03212	14.33	566	0.0453
14.345	573	0.04017	14.345	604	0.04178	14.345	588	0.05806	14.345	650	0.07492	14.345	606	0.03294	14.345	568	0.04546
14.36	608	0.04263	14.36	584	0.0404	14.36	614	0.06063	14.36	670	0.07722	14.36	620	0.0337	14.36	567	0.04538
14.375	606	0.04249	14.375	572	0.03957	14.375	558	0.0551	14.375	702	0.08091	14.375	623	0.03386	14.375	573	0.04586
14.39	602	0.04221	14.39	578	0.03998	14.39	596	0.05885	14.39	694	0.07999	14.39	619	0.03364	14.39	606	0.0485
14.405	598	0.04193	14.405	553	0.03825	14.405	620	0.06122	14.405	637	0.07342	14.405	571	0.03103	14.405	597	0.04778
14.42	598	0.04193	14.42	599	0.04144	14.42	559	0.0552	14.42	660	0.07607	14.42	548	0.02978	14.42	588	0.04706
14.435	627	0.04396	14.435	602	0.04164	14.435	582	0.05747	14.435	675	0.0778	14.435	578	0.03141	14.435	605	0.04842
14.45	640	0.04487	14.45	582	0.04026	14.45	594	0.05866	14.45	687	0.07918	14.45	584	0.03174	14.45	598	0.04786
14.465	602	0.04221	14.465	545	0.0377	14.465	560	0.0553	14.465	667	0.07688	14.465	590	0.03207	14.465	558	0.04466
14.48	621	0.04354	14.48	585	0.04047	14.48	578	0.05708	14.48	661	0.07619	14.48	579	0.03147	14.48	570	0.04562
14.495	610	0.04277	14.495	586	0.04054	14.495	577	0.05698	14.495	680	0.07838	14.495	594	0.03228	14.495	576	0.0461
14.51	557	0.03905	14.51	543	0.03756	14.51	581	0.05737	14.51	657	0.07573	14.51	582	0.03163	14.51	562	0.04498
14.525	626	0.04389	14.525	582	0.04026	14.525	599	0.05915	14.525	667	0.07688	14.525	569	0.03093	14.525	534	0.04274
14.54	627	0.04396	14.54	577	0.03991	14.54	577	0.05698	14.54	633	0.07296	14.54	570	0.03098	14.54	556	0.0445
14.555	572	0.0401	14.555	576	0.03985	14.555	557	0.055	14.555	643	0.07411	14.555	567	0.03082	14.555	598	0.04786
14.57	633	0.04438	14.57	616	0.04261	14.57	565	0.05579	14.57	646	0.07446	14.57	545	0.02962	14.57	576	0.0461
14.585	656	0.04599	14.585	582	0.04026	14.585	564	0.05569	14.585	644	0.07423	14.585	603	0.03277	14.585	588	0.04706
14.6	617	0.04326	14.6	583	0.04033	14.6	604	0.05964	14.6	634	0.07308	14.6	581	0.03158	14.6	590	0.04722
14.615	631	0.04424	14.615	572	0.03957	14.615	590	0.05826	14.615	645	0.07434	14.615	582	0.03163	14.615	585	0.04682
14.63	628	0.04403	14.63	592	0.04095	14.63	592	0.05846	14.63	626	0.07215	14.63	599	0.03256	14.63	608	0.04866
14.645	592	0.04151	14.645	576	0.03985	14.645	562	0.0555	14.645	659	0.07596	14.645	585	0.0318	14.645	572	0.04578
14.66	617	0.04326	14.66	566	0.03915	14.66	578	0.05708	14.66	661	0.07619	14.66	591	0.03212	14.66	609	0.04874
14.675	603	0.04228	14.675	572	0.03957	14.675	567	0.05599	14.675	657	0.07573	14.675	569	0.03093	14.675	637	0.05098
14.69	623	0.04368	14.69	570	0.03943	14.69	539	0.05322	14.69	692	0.07976	14.69	609	0.0331	14.69	630	0.05042
14.705	566	0.03968	14.705	584	0.0404	14.705	609	0.06014	14.705	661	0.07619	14.705	568	0.03087	14.705	602	0.04818
14.72	556	0.03898	14.72	618	0.04275	14.72	553	0.05461	14.72	643	0.07411	14.72	546	0.02968	14.72	571	0.0457
14.735	563	0.03947	14.735	600	0.04151	14.735	553	0.05461	14.735	612	0.07054	14.735	590	0.03207	14.735	592	0.04738
14.75	568	0.03982	14.75	581	0.04019	14.75	573	0.05658	14.75	653	0.07527	14.75	565	0.03071	14.75	563	0.04506
14.765	590	0.04137	14.765	568	0.03929	14.765	579	0.05717	14.765	662	0.0763	14.765	560	0.03044	14.765	620	0.04962
14.78	613	0.04298	14.78	601	0.04157	14.78	596	0.05885	14.78	651	0.07503	14.78	535	0.02908	14.78	621	0.0497
14.795	580	0.04066	14.795	613	0.0424	14.795	598	0.05905	14.795	651	0.07503	14.795	566	0.03076	14.795	575	0.04602
14.81	563	0.03947	14.81	600	0.04151	14.81	567	0.05599	14.81	628	0.07238	14.81	557	0.03027	14.81	560	0.04482
14.825	576	0.04038	14.825	589	0.04074	14.825	555	0.0548	14.825	649	0.0748	14.825	552	0.03	14.825	568	0.04546
14.84	622	0.04361	14.84	603	0.04171	14.84	583	0.05757	14.84	644	0.07423	14.84	570	0.03098	14.84	594	0.04754
14.855	637	0.04466	14.855	574	0.03971	14.855	593	0.05856	14.855	669	0.07711	14.855	544	0.02957	14.855	578	0.04626
14.87	630	0.04417	14.87	586	0.04054	14.87	547	0.05401	14.87	652	0.07515	14.87	531	0.02886	14.87	565	0.04522
14.885	566	0.03968	14.885	609	0.04213	14.885	565	0.05579	14.885	643	0.07411	14.885	581	0.03158	14.885	568	0.04546
14.9	585	0.04102	14.9	588	0.04068	14.9	562	0.0555	14.9	607	0.06996	14.9	609	0.0331	14.9	585	0.04682
14.915	594	0.04165	14.915	566	0.03915	14.915	553	0.05461	14.915	629	0.0725	14.915	574	0.0312	14.915	560	0.04482
14.93	566	0.03968	14.93	581	0.04019	14.93	588	0.05806	14.93	660	0.07607	14.93	540	0.02935	14.93	580	0.04642
14.945	549	0.03849	14.945	578	0.03998	14.945	604	0.05964	14.945	659	0.07596	14.945	564	0.03065	14.945	592	0.04738
14.96	584	0.04095	14.96	570	0.03943	14.96	576	0.05688	14.96	647	0.07457	14.96	575	0.03125	14.96	575	0.04602
14.975	613	0.04298	14.975	587	0.04061	14.975	555	0.0548	14.975	637	0.07342	14.975	548	0.02978	14.975	598	0.04786
14.99	601	0.04214	14.99	537	0.03715	14.99	560	0.0553	14.99	643	0.07411	14.99	580	0.03152	14.99	595	0.04762
15.005	595	0.04172	15.005	585	0.04047	15.005	560	0.0553	15.005	618	0.07123	15.005	571	0.03103	15.005	553	0.04426
15.02	573	0.04017	15.02	602	0.04164	15.02	556	0.0549	15.02	610	0.07031	15.02	601	0.03266	15.02	571	0.0457
15.035	566	0.03968	15.035	565	0.03908	15.035	568	0.05609	15.035	653	0.07527	15.035	553	0.03006	15.035	581	0.0465
15.05	594	0.04165	15.05	573	0.03964	15.05	554	0.05471	15.05	624	0.07192	15.05	563	0.0306	15.05	607	0.04858
15.065	611	0.04284	15.065	554	0.03832	15.065	550	0.05431	15.065	616	0.071	15.065	521	0.02832	15.065	574	0.04594
15.08	545	0.03821	15.08	569	0.03936	15.08	573	0.05658	15.08	611	0.07042	15.08	563	0.0306	15.08	544	0.04354
15.095	612	0.04291	15.095	578	0.03998	15.095	563	0.05559	15.095	625	0.07204	15.095	558	0.03033	15.095	552	0.04418
15.11	588	0.04123	15.11	572	0.03957	15.11	524	0.05174	15.11	655	0.0755	15.11	558	0.03033	15.11	578	0.04626
15.125	587	0.04116	15.125	563	0.03895	15.125	520	0.05135	15.125	642	0.074	15.125	497	0.02701	15.125	591	0.0473
15.14	588	0.04123	15.14	576	0.03985	15.14	538	0.05313	15.14	640	0.07377	15.14	523	0.02843	15.14	594	0.04754
15.155	553	0.03877	15.155	572	0.03957	15.155	532	0.05253	15.155	608	0.07008	15.155	512	0.02783	15.155	534	0.04274
15.17	585	0.04102	15.17	597	0.0413	15.17	554	0.05471	15.17	654	0.07538	15.17	530	0.02881	15.17	544	0.04354
15.185	569	0.03989	15.185	584	0.0404	15.185	550	0.05431	15.185	653	0.07527	15.185	524	0.02848	15.185	572	0.04578
15.2	593	0.04158	15.2	588	0.04068	15.2	516	0.05095	15.2	664	0.07653	15.2	540	0.02935	15.2	580	0.04642
15.215	606	0.04249	15.215	558	0.0386	15.215	555	0.0548	15.215	634	0.07308	15.215	548	0.02978	15.215	555	0.04442
15.23	626	0.04389	15.23	561	0.03881	15.23	544	0.05372	15.23	615	0.07089	15.23	552	0.03	15.23	604	0.04834
15.245	617	0.04326	15.245	585	0.04047	15.245	563	0.05559	15.245	608	0.07008	15.245	558	0.03033	15.245	616	0.0493
15.26	575	0.04031	15.26	583	0.04033	15.26	543	0.05362	15.26	640	0.07377	15.26	501	0.02723	15.26	583	0.04666
15.275	610	0.04277	15.275	592	0.04095	15.275	542	0.05352	15.275	655	0.0755	15.275	546	0.02968	15.275	586	0.0469
15.29	586	0.04109	15.29	614	0.04247	15.29	527	0.05204	15.29	637	0.07342	15.29	563	0.0306	15.29	545	0.04362
15.305	589	0.0413	15.305	581	0.04019	15.305	574	0.05668	15.305	641	0.07388	15.305	523	0.02843	15.305	574	0.04594
15.32	600	0.04207	15.32	526	0.03639	15.32	588	0.05806	15.32	623	0.07181	15.32	547	0.02973	15.32	612	0.04898
15.335	544	0.03814	15.335	543	0.03756	15.335	582	0.05747	15.335	679	0.07826	15.335	546	0.02968	15.335	604	0.04834
15.35	547	0.03835	15.35	533	0.03687	15.35	564	0.05569	15.35	618	0.07123	15.35	538	0.02924	15.35	604	0.04834
15.365	579	0.04059	15.365	574	0.03971	15.365	539	0.05322	15.365	603	0.0695	15.365	541	0.0294	15.365	562	0.04498
15.38	595	0.04172	15.38	546	0.03777	15.38	553	0.05461	15.38	610	0.07031	15.38	567	0.03082	15.38	552	0.04418
15.395	589	0.0413	15.395	551	0.03812	15.395	581	0.05737	15.395	617	0.07112	15.395	548	0.02978	15.395	539	0.04314
15.41	597	0.04186	15.41	564	0.03901	15.41	605	0.05974	15.41	607	0.06996	15.41	513	0.02788	15.41	583	0.04666
15.425	606	0.04249	15.425	571	0.0395	15.425	583	0.05757	15.425	643	0.07411	15.425	561	0.03049	15.425	574	0.04594
15.44	585	0.04102	15.44	599	0.04144	15.44	583	0.05757	15.44	603	0.0695	15.44	524	0.02848	15.44	589	0.04714
15.455	552	0.0387	15.455	599	0.04144	15.455	568	0.05609	15.455	632	0.07284	15.455	553	0.03006	15.455	607	0.04858
15.47	590	0.04137	15.47	588	0.04068	15.47	562	0.0555	15.47	585	0.06743	15.47	490	0.02663	15.47	589	0.04714
15.485	608	0.04263	15.485	620	0.04289	15.485	561	0.0554	15.485	611	0.07042	15.485	515	0.02799	15.485	598	0.04786
15.5	604	0.04235	15.5	599	0.04144	15.5	567	0.05599	15.5	627	0.07227	15.5	547	0.02973	15.5	606	0.0485
15.515	590	0.04137	15.515	579	0.04005	15.515	566	0.05589	15.515	639	0.07365	15.515	570	0.03098	15.515	638	0.05106
15.53	602	0.04221	15.53	601	0.04157	15.53	572	0.05648	15.53	610	0.07031	15.53	522	0.02837	15.53	581	0.0465
15.545	622	0.04361	15.545	613	0.0424	15.545	563	0.05559	15.545	627	0.07227	15.545	494	0.02685	15.545	572	0.04578
15.56	601	0.04214	15.56	593	0.04102	15.56	560	0.0553	15.56	634	0.07308	15.56	525	0.02853	15.56	593	0.04746
15.575	606	0.04249	15.575	606	0.04192	15.575	550	0.05431	15.575	577	0.06651	15.575	502	0.02728	15.575	562	0.04498
15.59	602	0.04221	15.59	606	0.04192	15.59	514	0.05076	15.59	627	0.07227	15.59	553	0.03006	15.59	577	0.04618
15.605	608	0.04263	15.605	582	0.04026	15.605	573	0.05658	15.605	655	0.0755	15.605	538	0.02924	15.605	574	0.04594
15.62	618	0.04333	15.62	569	0.03936	15.62	604	0.05964	15.62	622	0.07169	15.62	539	0.0293	15.62	587	0.04698
15.635	618	0.04333	15.635	548	0.03791	15.635	566	0.05589	15.635	610	0.07031	15.635	519	0.02821	15.635	569	0.04554
15.65	609	0.0427	15.65	579	0.04005	15.65	544	0.05372	15.65	639	0.07365	15.65	491	0.02669	15.65	562	0.04498
15.665	609	0.0427	15.665	593	0.04102	15.665	525	0.05184	15.665	645	0.07434	15.665	520	0.02826	15.665	599	0.04794
15.68	594	0.04165	15.68	572	0.03957	15.68	588	0.05806	15.68	650	0.07492	15.68	529	0.02875	15.68	564	0.04514
15.695	593	0.04158	15.695	608	0.04206	15.695	587	0.05796	15.695	619	0.07135	15.695	564	0.03065	15.695	585	0.04682
15.71	578	0.04052	15.71	585	0.04047	15.71	595	0.05875	15.71	629	0.0725	15.71	535	0.02908	15.71	603	0.04826
15.725	622	0.04361	15.725	573	0.03964	15.725	524	0.05174	15.725	620	0.07146	15.725	530	0.02881	15.725	583	0.04666
15.74	650	0.04557	15.74	564	0.03901	15.74	542	0.05352	15.74	605	0.06973	15.74	533	0.02897	15.74	632	0.05058
15.755	636	0.04459	15.755	558	0.0386	15.755	556	0.0549	15.755	590	0.068	15.755	520	0.02826	15.755	630	0.05042
15.77	628	0.04403	15.77	598	0.04137	15.77	579	0.05717	15.77	605	0.06973	15.77	484	0.02631	15.77	573	0.04586
15.785	575	0.04031	15.785	608	0.04206	15.785	603	0.05954	15.785	653	0.07527	15.785	524	0.02848	15.785	578	0.04626
15.8	573	0.04017	15.8	605	0.04185	15.8	539	0.05322	15.8	629	0.0725	15.8	529	0.02875	15.8	572	0.04578
15.815	599	0.042	15.815	596	0.04123	15.815	609	0.06014	15.815	636	0.07331	15.815	553	0.03006	15.815	614	0.04914
15.83	598	0.04193	15.83	615	0.04254	15.83	575	0.05678	15.83	612	0.07054	15.83	523	0.02843	15.83	613	0.04906
15.845	629	0.0441	15.845	604	0.04178	15.845	572	0.05648	15.845	648	0.07469	15.845	530	0.02881	15.845	650	0.05202
15.86	615	0.04312	15.86	604	0.04178	15.86	565	0.05579	15.86	660	0.07607	15.86	601	0.03266	15.86	631	0.0505
15.875	599	0.042	15.875	599	0.04144	15.875	601	0.05935	15.875	688	0.0793	15.875	567	0.03082	15.875	639	0.05114
15.89	630	0.04417	15.89	603	0.04171	15.89	553	0.05461	15.89	646	0.07446	15.89	508	0.02761	15.89	590	0.04722
15.905	593	0.04158	15.905	588	0.04068	15.905	549	0.05421	15.905	658	0.07584	15.905	525	0.02853	15.905	591	0.0473
15.92	625	0.04382	15.92	594	0.04109	15.92	552	0.05451	15.92	618	0.07123	15.92	554	0.03011	15.92	620	0.04962
15.935	590	0.04137	15.935	615	0.04254	15.935	618	0.06102	15.935	614	0.07077	15.935	592	0.03218	15.935	644	0.05154
15.95	646	0.04529	15.95	610	0.0422	15.95	616	0.06083	15.95	638	0.07354	15.95	604	0.03283	15.95	673	0.05386
15.965	614	0.04305	15.965	629	0.04351	15.965	604	0.05964	15.965	629	0.0725	15.965	552	0.03	15.965	635	0.05082
15.98	632	0.04431	15.98	616	0.04261	15.98	585	0.05777	15.98	634	0.07308	15.98	542	0.02946	15.98	624	0.04994
15.995	590	0.04137	15.995	624	0.04317	15.995	552	0.05451	15.995	617	0.07112	15.995	533	0.02897	15.995	598	0.04786
16.01	602	0.04221	16.01	638	0.04413	16.01	571	0.05638	16.01	702	0.08091	16.01	564	0.03065	16.01	586	0.0469
16.025	633	0.04438	16.025	637	0.04406	16.025	587	0.05796	16.025	662	0.0763	16.025	562	0.03055	16.025	614	0.04914
16.04	620	0.04347	16.04	644	0.04455	16.04	612	0.06043	16.04	635	0.07319	16.04	559	0.03038	16.04	608	0.04866
16.055	623	0.04368	16.055	644	0.04455	16.055	564	0.05569	16.055	635	0.07319	16.055	572	0.03109	16.055	616	0.0493
16.07	588	0.04123	16.07	603	0.04171	16.07	564	0.05569	16.07	623	0.07181	16.07	531	0.02886	16.07	592	0.04738
16.085	609	0.0427	16.085	569	0.03936	16.085	568	0.05609	16.085	615	0.07089	16.085	556	0.03022	16.085	608	0.04866
16.1	628	0.04403	16.1	647	0.04476	16.1	578	0.05708	16.1	587	0.06766	16.1	560	0.03044	16.1	627	0.05018
16.115	610	0.04277	16.115	641	0.04434	16.115	544	0.05372	16.115	648	0.07469	16.115	528	0.0287	16.115	623	0.04986
16.13	624	0.04375	16.13	581	0.04019	16.13	588	0.05806	16.13	606	0.06985	16.13	532	0.02891	16.13	619	0.04954
16.145	621	0.04354	16.145	613	0.0424	16.145	609	0.06014	16.145	617	0.07112	16.145	535	0.02908	16.145	646	0.0517
16.16	601	0.04214	16.16	601	0.04157	16.16	614	0.06063	16.16	586	0.06754	16.16	535	0.02908	16.16	638	0.05106
16.175	657	0.04606	16.175	636	0.044	16.175	572	0.05648	16.175	634	0.07308	16.175	546	0.02968	16.175	643	0.05146
16.19	650	0.04557	16.19	635	0.04393	16.19	545	0.05382	16.19	623	0.07181	16.19	556	0.03022	16.19	649	0.05194
16.205	643	0.04508	16.205	637	0.04406	16.205	548	0.05411	16.205	617	0.07112	16.205	514	0.02794	16.205	665	0.05322
16.22	636	0.04459	16.22	673	0.04656	16.22	594	0.05866	16.22	651	0.07503	16.22	512	0.02783	16.22	644	0.05154
16.235	647	0.04536	16.235	697	0.04822	16.235	586	0.05787	16.235	727	0.08379	16.235	518	0.02815	16.235	623	0.04986
16.25	705	0.04943	16.25	668	0.04621	16.25	652	0.06438	16.25	665	0.07665	16.25	539	0.0293	16.25	666	0.0533
16.265	681	0.04775	16.265	660	0.04566	16.265	630	0.06221	16.265	644	0.07423	16.265	531	0.02886	16.265	693	0.05546
16.28	674	0.04726	16.28	676	0.04676	16.28	615	0.06073	16.28	631	0.07273	16.28	533	0.02897	16.28	671	0.0537
16.295	699	0.04901	16.295	704	0.0487	16.295	604	0.05964	16.295	657	0.07573	16.295	562	0.03055	16.295	715	0.05722
16.31	702	0.04922	16.31	699	0.04835	16.31	611	0.06033	16.31	688	0.0793	16.31	553	0.03006	16.31	712	0.05698
16.325	670	0.04697	16.325	730	0.0505	16.325	618	0.06102	16.325	707	0.08149	16.325	556	0.03022	16.325	659	0.05274
16.34	685	0.04803	16.34	735	0.05084	16.34	644	0.06359	16.34	699	0.08057	16.34	604	0.03283	16.34	704	0.05634
16.355	713	0.04999	16.355	762	0.05271	16.355	649	0.06409	16.355	694	0.07999	16.355	588	0.03196	16.355	712	0.05698
16.37	722	0.05062	16.37	731	0.05057	16.37	691	0.06823	16.37	683	0.07872	16.37	583	0.03169	16.37	737	0.05898
16.385	789	0.05532	16.385	729	0.05043	16.385	666	0.06576	16.385	682	0.07861	16.385	618	0.03359	16.385	739	0.05914
16.4	821	0.05756	16.4	792	0.05479	16.4	699	0.06902	16.4	714	0.0823	16.4	610	0.03315	16.4	786	0.06291
16.415	810	0.05679	16.415	834	0.05769	16.415	717	0.0708	16.415	692	0.07976	16.415	653	0.03549	16.415	800	0.06403
16.43	842	0.05903	16.43	835	0.05776	16.43	705	0.06962	16.43	705	0.08126	16.43	674	0.03663	16.43	784	0.06275
16.445	868	0.06086	16.445	885	0.06122	16.445	698	0.06892	16.445	755	0.08702	16.445	686	0.03728	16.445	828	0.06627
16.46	884	0.06198	16.46	920	0.06364	16.46	721	0.0712	16.46	788	0.09083	16.46	669	0.03636	16.46	815	0.06523
16.475	887	0.06219	16.475	946	0.06544	16.475	756	0.07465	16.475	710	0.08183	16.475	681	0.03701	16.475	818	0.06547
16.49	910	0.0638	16.49	937	0.06482	16.49	738	0.07287	16.49	733	0.08449	16.49	706	0.03837	16.49	878	0.07027
16.505	942	0.06605	16.505	1002	0.06931	16.505	744	0.07347	16.505	761	0.08771	16.505	731	0.03973	16.505	901	0.07211
16.52	1009	0.07074	16.52	988	0.06835	16.52	788	0.07781	16.52	818	0.09428	16.52	747	0.0406	16.52	904	0.07235
16.535	1005	0.07046	16.535	1029	0.07118	16.535	812	0.08018	16.535	846	0.09751	16.535	785	0.04267	16.535	916	0.07331
16.55	1058	0.07418	16.55	1064	0.0736	16.55	854	0.08433	16.55	843	0.09716	16.55	783	0.04256	16.55	1011	0.08091
16.565	1075	0.07537	16.565	1126	0.07789	16.565	884	0.08729	16.565	824	0.09497	16.565	837	0.04549	16.565	1019	0.08155
16.58	1210	0.08483	16.58	1172	0.08107	16.58	825	0.08147	16.58	874	0.10074	16.58	899	0.04886	16.58	990	0.07923
16.595	1242	0.08708	16.595	1200	0.08301	16.595	891	0.08798	16.595	911	0.105	16.595	930	0.05055	16.595	1050	0.08403
16.61	1294	0.09072	16.61	1221	0.08446	16.61	921	0.09094	16.61	907	0.10454	16.61	983	0.05343	16.61	1063	0.08507
16.625	1319	0.09248	16.625	1224	0.08467	16.625	959	0.0947	16.625	988	0.11388	16.625	1014	0.05511	16.625	1094	0.08756
16.64	1333	0.09346	16.64	1290	0.08924	16.64	1035	0.1022	16.64	976	0.11249	16.64	1058	0.0575	16.64	1169	0.09356
16.655	1397	0.09795	16.655	1330	0.092	16.655	1053	0.10398	16.655	994	0.11457	16.655	1097	0.05962	16.655	1162	0.093
16.67	1462	0.1025	16.67	1371	0.09484	16.67	1069	0.10556	16.67	1016	0.1171	16.67	1216	0.06609	16.67	1259	0.10076
16.685	1567	0.10986	16.685	1401	0.09691	16.685	1069	0.10556	16.685	1079	0.12437	16.685	1299	0.0706	16.685	1327	0.1062
16.7	1566	0.10979	16.7	1469	0.10162	16.7	1074	0.10605	16.7	1091	0.12575	16.7	1454	0.07903	16.7	1353	0.10828
16.715	1690	0.11849	16.715	1531	0.10591	16.715	1184	0.11692	16.715	1146	0.13209	16.715	1609	0.08745	16.715	1415	0.11325
16.73	1731	0.12136	16.73	1566	0.10833	16.73	1188	0.11731	16.73	1102	0.12702	16.73	1742	0.09468	16.73	1443	0.11549
16.745	1756	0.12312	16.745	1645	0.11379	16.745	1284	0.12679	16.745	1114	0.1284	16.745	1917	0.10419	16.745	1439	0.11517
16.76	1684	0.11807	16.76	1657	0.11462	16.76	1314	0.12975	16.76	1237	0.14258	16.76	1983	0.10778	16.76	1467	0.11741
16.775	1594	0.11176	16.775	1596	0.1104	16.775	1249	0.12333	16.775	1224	0.14108	16.775	1903	0.10343	16.775	1435	0.11485
16.79	1451	0.10173	16.79	1438	0.09947	16.79	1057	0.10437	16.79	1063	0.12252	16.79	1570	0.08533	16.79	1342	0.1074
16.805	1310	0.09185	16.805	1247	0.08626	16.805	937	0.09252	16.805	937	0.108	16.805	1194	0.06489	16.805	1139	0.09116
16.82	1169	0.08196	16.82	1083	0.07492	16.82	847	0.08364	16.82	839	0.0967	16.82	971	0.05277	16.82	995	0.07963
16.835	1102	0.07726	16.835	964	0.06669	16.835	802	0.07919	16.835	821	0.09463	16.835	815	0.0443	16.835	928	0.07427
16.85	1068	0.07488	16.85	958	0.06627	16.85	763	0.07534	16.85	744	0.08575	16.85	788	0.04283	16.85	917	0.07339
16.865	978	0.06857	16.865	875	0.06053	16.865	691	0.06823	16.865	757	0.08725	16.865	687	0.03734	16.865	880	0.07043
16.88	958	0.06717	16.88	821	0.05679	16.88	749	0.07396	16.88	745	0.08587	16.88	717	0.03897	16.88	818	0.06547
16.895	904	0.06338	16.895	787	0.05444	16.895	687	0.06784	16.895	730	0.08414	16.895	730	0.03968	16.895	784	0.06275
16.91	826	0.05791	16.91	769	0.0532	16.91	679	0.06705	16.91	673	0.07757	16.91	656	0.03565	16.91	768	0.06146
16.925	856	0.06002	16.925	741	0.05126	16.925	682	0.06734	16.925	706	0.08137	16.925	613	0.03332	16.925	750	0.06002
16.94	869	0.06093	16.94	685	0.04739	16.94	665	0.06567	16.94	693	0.07988	16.94	625	0.03397	16.94	740	0.05922
16.955	769	0.05392	16.955	702	0.04856	16.955	629	0.06211	16.955	647	0.07457	16.955	624	0.03391	16.955	689	0.05514
16.97	760	0.05328	16.97	671	0.04642	16.97	640	0.0632	16.97	636	0.07331	16.97	603	0.03277	16.97	652	0.05218
16.985	714	0.05006	16.985	642	0.04441	16.985	606	0.05984	16.985	619	0.07135	16.985	585	0.0318	16.985	660	0.05282
17	741	0.05195	17	629	0.04351	17	621	0.06132	17	653	0.07527	17	546	0.02968	17	606	0.0485
17.015	709	0.04971	17.015	618	0.04275	17.015	594	0.05866	17.015	644	0.07423	17.015	526	0.02859	17.015	629	0.05034
17.03	688	0.04824	17.03	652	0.0451	17.03	589	0.05816	17.03	640	0.07377	17.03	531	0.02886	17.03	654	0.05234
17.045	708	0.04964	17.045	611	0.04227	17.045	564	0.05569	17.045	632	0.07284	17.045	563	0.0306	17.045	593	0.04746
17.06	700	0.04908	17.06	597	0.0413	17.06	557	0.055	17.06	601	0.06927	17.06	545	0.02962	17.06	630	0.05042
17.075	658	0.04613	17.075	602	0.04164	17.075	567	0.05599	17.075	597	0.06881	17.075	532	0.02891	17.075	613	0.04906
17.09	650	0.04557	17.09	627	0.04337	17.09	583	0.05757	17.09	543	0.06259	17.09	474	0.02576	17.09	587	0.04698
17.105	629	0.0441	17.105	588	0.04068	17.105	566	0.05589	17.105	601	0.06927	17.105	508	0.02761	17.105	573	0.04586
17.12	641	0.04494	17.12	576	0.03985	17.12	569	0.05619	17.12	578	0.06662	17.12	515	0.02799	17.12	527	0.04218
17.135	607	0.04256	17.135	564	0.03901	17.135	517	0.05105	17.135	554	0.06385	17.135	481	0.02614	17.135	547	0.04378
17.15	601	0.04214	17.15	525	0.03632	17.15	521	0.05145	17.15	562	0.06478	17.15	492	0.02674	17.15	552	0.04418
17.165	586	0.04109	17.165	536	0.03708	17.165	509	0.05026	17.165	559	0.06443	17.165	520	0.02826	17.165	563	0.04506
17.18	595	0.04172	17.18	521	0.03604	17.18	474	0.04681	17.18	574	0.06616	17.18	484	0.02631	17.18	570	0.04562
17.195	608	0.04263	17.195	531	0.03673	17.195	507	0.05006	17.195	565	0.06512	17.195	461	0.02506	17.195	563	0.04506
17.21	589	0.0413	17.21	550	0.03805	17.21	530	0.05234	17.21	558	0.06432	17.21	485	0.02636	17.21	528	0.04226
17.225	605	0.04242	17.225	544	0.03763	17.225	491	0.04848	17.225	550	0.06339	17.225	504	0.02739	17.225	551	0.0441
17.24	562	0.0394	17.24	537	0.03715	17.24	504	0.04977	17.24	609	0.07019	17.24	480	0.02609	17.24	556	0.0445
17.255	528	0.03702	17.255	542	0.03749	17.255	540	0.05332	17.255	600	0.06916	17.255	526	0.02859	17.255	555	0.04442
17.27	588	0.04123	17.27	526	0.03639	17.27	512	0.05056	17.27	560	0.06455	17.27	496	0.02696	17.27	539	0.04314
17.285	588	0.04123	17.285	499	0.03452	17.285	505	0.04987	17.285	563	0.06489	17.285	505	0.02745	17.285	530	0.04242
17.3	603	0.04228	17.3	492	0.03403	17.3	552	0.05451	17.3	593	0.06835	17.3	477	0.02593	17.3	515	0.04122
17.315	592	0.04151	17.315	498	0.03445	17.315	524	0.05174	17.315	529	0.06097	17.315	490	0.02663	17.315	553	0.04426
17.33	567	0.03975	17.33	510	0.03528	17.33	495	0.04888	17.33	547	0.06305	17.33	461	0.02506	17.33	566	0.0453
17.345	561	0.03933	17.345	546	0.03777	17.345	486	0.04799	17.345	549	0.06328	17.345	487	0.02647	17.345	549	0.04394
17.36	580	0.04066	17.36	541	0.03742	17.36	515	0.05085	17.36	551	0.06351	17.36	452	0.02457	17.36	532	0.04258
17.375	594	0.04165	17.375	515	0.03563	17.375	533	0.05263	17.375	546	0.06293	17.375	486	0.02641	17.375	516	0.0413
17.39	573	0.04017	17.39	525	0.03632	17.39	494	0.04878	17.39	546	0.06293	17.39	514	0.02794	17.39	533	0.04266
17.405	547	0.03835	17.405	485	0.03355	17.405	493	0.04868	17.405	543	0.06259	17.405	479	0.02603	17.405	571	0.0457
17.42	563	0.03947	17.42	513	0.03549	17.42	517	0.05105	17.42	540	0.06224	17.42	441	0.02397	17.42	591	0.0473
17.435	553	0.03877	17.435	503	0.0348	17.435	479	0.0473	17.435	525	0.06051	17.435	485	0.02636	17.435	536	0.0429
17.45	545	0.03821	17.45	480	0.0332	17.45	536	0.05293	17.45	567	0.06535	17.45	501	0.02723	17.45	534	0.04274
17.465	554	0.03884	17.465	506	0.035	17.465	502	0.04957	17.465	568	0.06547	17.465	477	0.02593	17.465	518	0.04146
17.48	547	0.03835	17.48	505	0.03493	17.48	463	0.04572	17.48	551	0.06351	17.48	473	0.02571	17.48	519	0.04154
17.495	563	0.03947	17.495	524	0.03625	17.495	508	0.05016	17.495	547	0.06305	17.495	442	0.02402	17.495	519	0.04154
17.51	573	0.04017	17.51	522	0.03611	17.51	497	0.04908	17.51	569	0.06558	17.51	431	0.02343	17.51	544	0.04354
17.525	572	0.0401	17.525	506	0.035	17.525	496	0.04898	17.525	548	0.06316	17.525	447	0.02429	17.525	512	0.04098
17.54	595	0.04172	17.54	498	0.03445	17.54	483	0.04769	17.54	523	0.06028	17.54	483	0.02625	17.54	528	0.04226
17.555	596	0.04179	17.555	542	0.03749	17.555	509	0.05026	17.555	528	0.06086	17.555	506	0.0275	17.555	540	0.04322
17.57	566	0.03968	17.57	513	0.03549	17.57	492	0.04858	17.57	558	0.06432	17.57	489	0.02658	17.57	557	0.04458
17.585	569	0.03989	17.585	525	0.03632	17.585	486	0.04799	17.585	585	0.06743	17.585	468	0.02544	17.585	532	0.04258
17.6	565	0.03961	17.6	527	0.03646	17.6	508	0.05016	17.6	519	0.05982	17.6	447	0.02429	17.6	507	0.04058
17.615	559	0.03919	17.615	503	0.0348	17.615	471	0.04651	17.615	556	0.06408	17.615	431	0.02343	17.615	537	0.04298
17.63	547	0.03835	17.63	507	0.03507	17.63	464	0.04582	17.63	545	0.06282	17.63	478	0.02598	17.63	535	0.04282
17.645	568	0.03982	17.645	498	0.03445	17.645	499	0.04927	17.645	556	0.06408	17.645	505	0.02745	17.645	526	0.0421
17.66	580	0.04066	17.66	500	0.03459	17.66	491	0.04848	17.66	499	0.05751	17.66	464	0.02522	17.66	550	0.04402
17.675	575	0.04031	17.675	500	0.03459	17.675	458	0.04523	17.675	560	0.06455	17.675	465	0.02527	17.675	531	0.0425
17.69	562	0.0394	17.69	529	0.03659	17.69	490	0.04839	17.69	546	0.06293	17.69	497	0.02701	17.69	522	0.04178
17.705	567	0.03975	17.705	529	0.03659	17.705	509	0.05026	17.705	543	0.06259	17.705	477	0.02593	17.705	598	0.04786
17.72	545	0.03821	17.72	512	0.03542	17.72	516	0.05095	17.72	526	0.06063	17.72	482	0.0262	17.72	555	0.04442
17.735	564	0.03954	17.735	495	0.03424	17.735	505	0.04987	17.735	507	0.05844	17.735	486	0.02641	17.735	524	0.04194
17.75	564	0.03954	17.75	495	0.03424	17.75	482	0.0476	17.75	484	0.05579	17.75	465	0.02527	17.75	502	0.04018
17.765	550	0.03856	17.765	529	0.03659	17.765	531	0.05243	17.765	523	0.06028	17.765	460	0.025	17.765	507	0.04058
17.78	578	0.04052	17.78	550	0.03805	17.78	518	0.05115	17.78	537	0.06189	17.78	491	0.02669	17.78	505	0.04042
17.795	567	0.03975	17.795	532	0.0368	17.795	505	0.04987	17.795	528	0.06086	17.795	517	0.0281	17.795	553	0.04426
17.81	567	0.03975	17.81	575	0.03978	17.81	511	0.05046	17.81	548	0.06316	17.81	467	0.02538	17.81	542	0.04338
17.825	565	0.03961	17.825	555	0.03839	17.825	518	0.05115	17.825	531	0.0612	17.825	499	0.02712	17.825	590	0.04722
17.84	542	0.038	17.84	547	0.03784	17.84	484	0.04779	17.84	578	0.06662	17.84	476	0.02587	17.84	553	0.04426
17.855	546	0.03828	17.855	533	0.03687	17.855	489	0.04829	17.855	574	0.06616	17.855	502	0.02728	17.855	557	0.04458
17.87	562	0.0394	17.87	536	0.03708	17.87	500	0.04937	17.87	547	0.06305	17.87	518	0.02815	17.87	526	0.0421
17.885	551	0.03863	17.885	524	0.03625	17.885	512	0.05056	17.885	521	0.06005	17.885	497	0.02701	17.885	547	0.04378
17.9	562	0.0394	17.9	503	0.0348	17.9	515	0.05085	17.9	507	0.05844	17.9	506	0.0275	17.9	590	0.04722
17.915	563	0.03947	17.915	540	0.03735	17.915	533	0.05263	17.915	521	0.06005	17.915	503	0.02734	17.915	540	0.04322
17.93	586	0.04109	17.93	541	0.03742	17.93	511	0.05046	17.93	527	0.06074	17.93	465	0.02527	17.93	538	0.04306
17.945	562	0.0394	17.945	551	0.03812	17.945	508	0.05016	17.945	538	0.06201	17.945	471	0.0256	17.945	546	0.0437
17.96	565	0.03961	17.96	550	0.03805	17.96	503	0.04967	17.96	564	0.06501	17.96	472	0.02565	17.96	563	0.04506
17.975	576	0.04038	17.975	555	0.03839	17.975	565	0.05579	17.975	570	0.0657	17.975	454	0.02468	17.975	553	0.04426
17.99	577	0.04045	17.99	527	0.03646	17.99	534	0.05273	17.99	557	0.0642	17.99	470	0.02554	17.99	563	0.04506
18.005	585	0.04102	18.005	564	0.03901	18.005	516	0.05095	18.005	584	0.06731	18.005	530	0.02881	18.005	545	0.04362
18.02	580	0.04066	18.02	529	0.03659	18.02	508	0.05016	18.02	543	0.06259	18.02	522	0.02837	18.02	573	0.04586
18.035	603	0.04228	18.035	563	0.03895	18.035	539	0.05322	18.035	568	0.06547	18.035	515	0.02799	18.035	575	0.04602
18.05	613	0.04298	18.05	569	0.03936	18.05	532	0.05253	18.05	561	0.06466	18.05	487	0.02647	18.05	563	0.04506
18.065	601	0.04214	18.065	563	0.03895	18.065	526	0.05194	18.065	561	0.06466	18.065	502	0.02728	18.065	580	0.04642
18.08	583	0.04087	18.08	538	0.03722	18.08	525	0.05184	18.08	569	0.06558	18.08	478	0.02598	18.08	562	0.04498
18.095	614	0.04305	18.095	555	0.03839	18.095	521	0.05145	18.095	541	0.06236	18.095	495	0.0269	18.095	541	0.0433
18.11	607	0.04256	18.11	577	0.03991	18.11	528	0.05214	18.11	573	0.06604	18.11	477	0.02593	18.11	552	0.04418
18.125	594	0.04165	18.125	563	0.03895	18.125	538	0.05313	18.125	566	0.06524	18.125	472	0.02565	18.125	574	0.04594
18.14	607	0.04256	18.14	526	0.03639	18.14	491	0.04848	18.14	560	0.06455	18.14	471	0.0256	18.14	564	0.04514
18.155	603	0.04228	18.155	551	0.03812	18.155	526	0.05194	18.155	574	0.06616	18.155	483	0.02625	18.155	573	0.04586
18.17	583	0.04087	18.17	543	0.03756	18.17	520	0.05135	18.17	604	0.06962	18.17	479	0.02603	18.17	546	0.0437
18.185	574	0.04024	18.185	580	0.04012	18.185	525	0.05184	18.185	557	0.0642	18.185	464	0.02522	18.185	572	0.04578
18.2	597	0.04186	18.2	581	0.04019	18.2	522	0.05155	18.2	540	0.06224	18.2	465	0.02527	18.2	624	0.04994
18.215	582	0.0408	18.215	604	0.04178	18.215	497	0.04908	18.215	562	0.06478	18.215	482	0.0262	18.215	587	0.04698
18.23	593	0.04158	18.23	617	0.04268	18.23	547	0.05401	18.23	574	0.06616	18.23	491	0.02669	18.23	595	0.04762
18.245	607	0.04256	18.245	607	0.04199	18.245	566	0.05589	18.245	561	0.06466	18.245	526	0.02859	18.245	601	0.0481
18.26	611	0.04284	18.26	599	0.04144	18.26	534	0.05273	18.26	549	0.06328	18.26	503	0.02734	18.26	612	0.04898
18.275	654	0.04585	18.275	576	0.03985	18.275	532	0.05253	18.275	573	0.06604	18.275	485	0.02636	18.275	574	0.04594
18.29	641	0.04494	18.29	580	0.04012	18.29	545	0.05382	18.29	547	0.06305	18.29	521	0.02832	18.29	588	0.04706
18.305	600	0.04207	18.305	606	0.04192	18.305	532	0.05253	18.305	634	0.07308	18.305	537	0.02919	18.305	595	0.04762
18.32	641	0.04494	18.32	630	0.04358	18.32	549	0.05421	18.32	570	0.0657	18.32	531	0.02886	18.32	610	0.04882
18.335	687	0.04817	18.335	617	0.04268	18.335	527	0.05204	18.335	600	0.06916	18.335	506	0.0275	18.335	626	0.0501
18.35	668	0.04683	18.35	607	0.04199	18.35	534	0.05273	18.35	587	0.06766	18.35	487	0.02647	18.35	630	0.05042
18.365	683	0.04789	18.365	642	0.04441	18.365	555	0.0548	18.365	617	0.07112	18.365	524	0.02848	18.365	607	0.04858
18.38	694	0.04866	18.38	629	0.04351	18.38	550	0.05431	18.38	590	0.068	18.38	537	0.02919	18.38	658	0.05266
18.395	682	0.04782	18.395	637	0.04406	18.395	560	0.0553	18.395	595	0.06858	18.395	508	0.02761	18.395	677	0.05418
18.41	655	0.04592	18.41	636	0.044	18.41	612	0.06043	18.41	607	0.06996	18.41	534	0.02902	18.41	668	0.05346
18.425	639	0.0448	18.425	629	0.04351	18.425	612	0.06043	18.425	589	0.06789	18.425	558	0.03033	18.425	690	0.05522
18.44	633	0.04438	18.44	667	0.04614	18.44	572	0.05648	18.44	629	0.0725	18.44	515	0.02799	18.44	640	0.05122
18.455	692	0.04852	18.455	681	0.04711	18.455	602	0.05945	18.455	665	0.07665	18.455	546	0.02968	18.455	675	0.05402
18.47	734	0.05146	18.47	675	0.04669	18.47	591	0.05836	18.47	655	0.0755	18.47	582	0.03163	18.47	716	0.0573
18.485	699	0.04901	18.485	719	0.04974	18.485	610	0.06024	18.485	633	0.07296	18.485	550	0.02989	18.485	692	0.05538
18.5	710	0.04978	18.5	747	0.05167	18.5	614	0.06063	18.5	688	0.0793	18.5	548	0.02978	18.5	700	0.05602
18.515	723	0.05069	18.515	699	0.04835	18.515	636	0.0628	18.515	639	0.07365	18.515	542	0.02946	18.515	770	0.06162
18.53	735	0.05153	18.53	692	0.04787	18.53	651	0.06428	18.53	615	0.07089	18.53	583	0.03169	18.53	728	0.05826
18.545	749	0.05251	18.545	739	0.05112	18.545	661	0.06527	18.545	663	0.07642	18.545	588	0.03196	18.545	759	0.06074
18.56	756	0.053	18.56	767	0.05306	18.56	656	0.06478	18.56	704	0.08114	18.56	572	0.03109	18.56	784	0.06275
18.575	778	0.05455	18.575	761	0.05264	18.575	663	0.06547	18.575	690	0.07953	18.575	598	0.0325	18.575	803	0.06427
18.59	814	0.05707	18.59	797	0.05513	18.59	690	0.06813	18.59	712	0.08207	18.59	585	0.0318	18.59	790	0.06323
18.605	866	0.06072	18.605	819	0.05665	18.605	693	0.06843	18.605	712	0.08207	18.605	592	0.03218	18.605	795	0.06363
18.62	821	0.05756	18.62	797	0.05513	18.62	703	0.06942	18.62	725	0.08356	18.62	626	0.03402	18.62	819	0.06555
18.635	818	0.05735	18.635	827	0.05721	18.635	756	0.07465	18.635	711	0.08195	18.635	629	0.03419	18.635	881	0.07051
18.65	860	0.0603	18.65	849	0.05873	18.65	734	0.07248	18.65	718	0.08276	18.65	611	0.03321	18.65	889	0.07115
18.665	886	0.06212	18.665	891	0.06164	18.665	773	0.07633	18.665	759	0.08748	18.665	589	0.03201	18.665	902	0.07219
18.68	918	0.06436	18.68	955	0.06606	18.68	799	0.0789	18.68	789	0.09094	18.68	660	0.03587	18.68	904	0.07235
18.695	942	0.06605	18.695	961	0.06648	18.695	845	0.08344	18.695	796	0.09175	18.695	644	0.035	18.695	928	0.07427
18.71	950	0.06661	18.71	978	0.06765	18.71	798	0.0788	18.71	817	0.09417	18.71	671	0.03647	18.71	997	0.07979
18.725	1003	0.07032	18.725	1033	0.07146	18.725	873	0.08621	18.725	865	0.0997	18.725	704	0.03826	18.725	1024	0.08195
18.74	1025	0.07186	18.74	1062	0.07346	18.74	914	0.09025	18.74	832	0.0959	18.74	697	0.03788	18.74	1042	0.08339
18.755	1014	0.07109	18.755	1034	0.07153	18.755	928	0.09164	18.755	894	0.10304	18.755	726	0.03946	18.755	1081	0.08651
18.77	1044	0.0732	18.77	1087	0.07519	18.77	984	0.09717	18.77	897	0.10339	18.77	742	0.04033	18.77	1129	0.09036
18.785	1124	0.07881	18.785	1127	0.07796	18.785	918	0.09065	18.785	914	0.10535	18.785	785	0.04267	18.785	1225	0.09804
18.8	1178	0.08259	18.8	1244	0.08605	18.8	1008	0.09954	18.8	960	0.11065	18.8	768	0.04174	18.8	1244	0.09956
18.815	1204	0.08441	18.815	1300	0.08993	18.815	1071	0.10576	18.815	991	0.11422	18.815	781	0.04245	18.815	1309	0.10476
18.83	1279	0.08967	18.83	1347	0.09318	18.83	1069	0.10556	18.83	1057	0.12183	18.83	826	0.04489	18.83	1351	0.10812
18.845	1276	0.08946	18.845	1429	0.09885	18.845	1134	0.11198	18.845	1109	0.12782	18.845	889	0.04832	18.845	1409	0.11277
18.86	1397	0.09795	18.86	1573	0.10881	18.86	1200	0.1185	18.86	1114	0.1284	18.86	922	0.05011	18.86	1512	0.12101
18.875	1466	0.10278	18.875	1601	0.11075	18.875	1209	0.11938	18.875	1160	0.1337	18.875	948	0.05152	18.875	1608	0.12869
18.89	1521	0.10664	18.89	1715	0.11864	18.89	1311	0.12946	18.89	1273	0.14673	18.89	963	0.05234	18.89	1658	0.13269
18.905	1671	0.11716	18.905	1841	0.12735	18.905	1354	0.1337	18.905	1242	0.14315	18.905	991	0.05386	18.905	1734	0.13878
18.92	1776	0.12452	18.92	1931	0.13358	18.92	1436	0.1418	18.92	1251	0.14419	18.92	1061	0.05767	18.92	1858	0.1487
18.935	1918	0.13447	18.935	2002	0.13849	18.935	1516	0.1497	18.935	1428	0.16459	18.935	1166	0.06337	18.935	1975	0.15806
18.95	2008	0.14078	18.95	2173	0.15032	18.95	1614	0.15938	18.95	1512	0.17427	18.95	1173	0.06375	18.95	2166	0.17335
18.965	2194	0.15382	18.965	2320	0.16049	18.965	1659	0.16382	18.965	1565	0.18038	18.965	1204	0.06544	18.965	2197	0.17583
18.98	2266	0.15887	18.98	2504	0.17322	18.98	1839	0.18159	18.98	1581	0.18223	18.98	1334	0.0725	18.98	2332	0.18663
18.995	2531	0.17745	18.995	2763	0.19113	18.995	1997	0.1972	18.995	1724	0.19871	18.995	1379	0.07495	18.995	2528	0.20232
19.01	2722	0.19084	19.01	2907	0.20109	19.01	2078	0.20519	19.01	1829	0.21081	19.01	1482	0.08055	19.01	2784	0.22281
19.025	2909	0.20395	19.025	3169	0.21922	19.025	2245	0.22168	19.025	1968	0.22683	19.025	1592	0.08653	19.025	2897	0.23185
19.04	3129	0.21938	19.04	3518	0.24336	19.04	2411	0.23808	19.04	2156	0.2485	19.04	1798	0.09772	19.04	3170	0.2537
19.055	3357	0.23536	19.055	3773	0.261	19.055	2558	0.25259	19.055	2268	0.26141	19.055	1905	0.10354	19.055	3383	0.27075
19.07	3653	0.25612	19.07	3895	0.26944	19.07	2777	0.27422	19.07	2356	0.27155	19.07	2061	0.11202	19.07	3679	0.29444
19.085	3799	0.26635	19.085	4112	0.28445	19.085	2890	0.28538	19.085	2537	0.29242	19.085	2123	0.11539	19.085	3761	0.301
19.1	4172	0.29251	19.1	4533	0.31357	19.1	3079	0.30404	19.1	2702	0.31143	19.1	2347	0.12756	19.1	4015	0.32133
19.115	4643	0.32553	19.115	4945	0.34207	19.115	3335	0.32932	19.115	2796	0.32227	19.115	2563	0.1393	19.115	4324	0.34606
19.13	5024	0.35224	19.13	5122	0.35432	19.13	3532	0.34877	19.13	2970	0.34232	19.13	2798	0.15207	19.13	4668	0.37359
19.145	5467	0.3833	19.145	5524	0.38213	19.145	3875	0.38264	19.145	3210	0.36999	19.145	3089	0.16789	19.145	4961	0.39704
19.16	6048	0.42403	19.16	5932	0.41035	19.16	4048	0.39972	19.16	3493	0.4026	19.16	3386	0.18403	19.16	5344	0.42769
19.175	6400	0.44871	19.175	6492	0.44909	19.175	4371	0.43162	19.175	3860	0.44491	19.175	3863	0.20996	19.175	5715	0.45738
19.19	6996	0.4905	19.19	6879	0.47586	19.19	4734	0.46746	19.19	4153	0.47868	19.19	4319	0.23474	19.19	6257	0.50076
19.205	7606	0.53327	19.205	7400	0.5119	19.205	5035	0.49719	19.205	4324	0.49839	19.205	4742	0.25773	19.205	6762	0.54118
19.22	8073	0.56601	19.22	7880	0.5451	19.22	5419	0.5351	19.22	4629	0.53354	19.22	5272	0.28654	19.22	7058	0.56487
19.235	8825	0.61873	19.235	8540	0.59076	19.235	5892	0.58181	19.235	5051	0.58218	19.235	5998	0.326	19.235	7582	0.6068
19.25	9470	0.66396	19.25	9090	0.6288	19.25	6163	0.60857	19.25	5300	0.61088	19.25	6739	0.36627	19.25	8261	0.66114
19.265	10059	0.70525	19.265	9613	0.66498	19.265	6498	0.64165	19.265	5752	0.66298	19.265	7521	0.40877	19.265	8575	0.68627
19.28	10747	0.75349	19.28	10128	0.70061	19.28	6975	0.68875	19.28	5991	0.69053	19.28	8430	0.45818	19.28	9269	0.74182
19.295	11501	0.80635	19.295	10696	0.7399	19.295	7492	0.7398	19.295	6371	0.73432	19.295	9488	0.51568	19.295	9780	0.78271
19.31	12114	0.84933	19.31	11503	0.79572	19.31	7948	0.78483	19.31	6704	0.77271	19.31	10773	0.58552	19.31	10344	0.82785
19.325	12745	0.89357	19.325	12375	0.85605	19.325	8358	0.82532	19.325	7034	0.81074	19.325	12465	0.67748	19.325	10839	0.86747
19.34	13520	0.94791	19.34	13010	0.89997	19.34	8953	0.88407	19.34	7389	0.85166	19.34	14309	0.77771	19.34	11443	0.91581
19.355	14174	0.99376	19.355	13823	0.95621	19.355	9568	0.9448	19.355	7976	0.91932	19.355	16621	0.90336	19.355	12050	0.96439
19.37	14263	1	19.37	14456	1	19.37	10127	1	19.37	8597	0.99089	19.37	18399	1	19.37	12495	1
19.385	13785	0.96649	19.385	14104	0.97565	19.385	9929	0.98045	19.385	8676	1	19.385	18375	0.9987	19.385	12199	0.97631
19.4	12477	0.87478	19.4	12943	0.89534	19.4	8778	0.86679	19.4	7750	0.89327	19.4	16105	0.87532	19.4	11087	0.88731
19.415	10599	0.74311	19.415	11043	0.7639	19.415	7198	0.71077	19.415	6301	0.72626	19.415	12112	0.6583	19.415	9491	0.75958
19.43	9019	0.63234	19.43	8990	0.62189	19.43	5783	0.57105	19.43	5116	0.58967	19.43	8230	0.44731	19.43	7917	0.63361
19.445	7779	0.5454	19.445	7285	0.50394	19.445	4958	0.48958	19.445	4278	0.49308	19.445	5757	0.3129	19.445	6652	0.53237
19.46	6807	0.47725	19.46	6366	0.44037	19.46	4318	0.42638	19.46	3844	0.44306	19.46	4544	0.24697	19.46	5822	0.46595
19.475	6237	0.43729	19.475	5675	0.39257	19.475	4015	0.39646	19.475	3532	0.4071	19.475	3705	0.20137	19.475	5246	0.41985
19.49	5518	0.38688	19.49	4946	0.34214	19.49	3528	0.34838	19.49	3199	0.36872	19.49	3201	0.17398	19.49	4739	0.37927
19.505	4933	0.34586	19.505	4526	0.31309	19.505	3348	0.3306	19.505	2851	0.32861	19.505	2825	0.15354	19.505	4390	0.35134
19.52	4522	0.31704	19.52	4121	0.28507	19.52	3023	0.29851	19.52	2594	0.29899	19.52	2524	0.13718	19.52	3960	0.31693
19.535	4138	0.29012	19.535	3809	0.26349	19.535	2791	0.2756	19.535	2466	0.28423	19.535	2284	0.12414	19.535	3723	0.29796
19.55	3778	0.26488	19.55	3540	0.24488	19.55	2605	0.25723	19.55	2321	0.26752	19.55	2065	0.11223	19.55	3327	0.26627
19.565	3302	0.23151	19.565	3225	0.22309	19.565	2393	0.2363	19.565	2080	0.23974	19.565	1906	0.10359	19.565	3115	0.2493
19.58	3093	0.21685	19.58	2957	0.20455	19.58	2268	0.22396	19.58	2002	0.23075	19.58	1802	0.09794	19.58	2902	0.23225
19.595	2801	0.19638	19.595	2676	0.18511	19.595	2159	0.21319	19.595	1855	0.21381	19.595	1682	0.09142	19.595	2609	0.2088
19.61	2661	0.18657	19.61	2608	0.18041	19.61	2038	0.20124	19.61	1708	0.19686	19.61	1563	0.08495	19.61	2495	0.19968
19.625	2435	0.17072	19.625	2335	0.16152	19.625	1832	0.1809	19.625	1648	0.18995	19.625	1445	0.07854	19.625	2343	0.18752
19.64	2233	0.15656	19.64	2166	0.14983	19.64	1736	0.17142	19.64	1533	0.17669	19.64	1367	0.0743	19.64	2126	0.17015
19.655	2047	0.14352	19.655	2029	0.14036	19.655	1610	0.15898	19.655	1421	0.16379	19.655	1322	0.07185	19.655	1949	0.15598
19.67	1896	0.13293	19.67	1884	0.13033	19.67	1500	0.14812	19.67	1324	0.1526	19.67	1269	0.06897	19.67	1919	0.15358
19.685	1761	0.12347	19.685	1763	0.12196	19.685	1485	0.14664	19.685	1332	0.15353	19.685	1214	0.06598	19.685	1917	0.15342
19.7	1643	0.11519	19.7	1660	0.11483	19.7	1385	0.13676	19.7	1265	0.1458	19.7	1124	0.06109	19.7	1815	0.14526
19.715	1560	0.10937	19.715	1583	0.1095	19.715	1313	0.12965	19.715	1221	0.14073	19.715	1112	0.06044	19.715	1650	0.13205
19.73	1529	0.1072	19.73	1493	0.10328	19.73	1238	0.12225	19.73	1156	0.13324	19.73	1077	0.05854	19.73	1529	0.12237
19.745	1407	0.09865	19.745	1333	0.09221	19.745	1188	0.11731	19.745	1094	0.12609	19.745	1017	0.05527	19.745	1459	0.11677
19.76	1338	0.09381	19.76	1349	0.09332	19.76	1155	0.11405	19.76	1045	0.12045	19.76	997	0.05419	19.76	1379	0.11036
19.775	1308	0.09171	19.775	1281	0.08861	19.775	1117	0.1103	19.775	999	0.11515	19.775	959	0.05212	19.775	1371	0.10972
19.79	1253	0.08785	19.79	1222	0.08453	19.79	1069	0.10556	19.79	995	0.11468	19.79	902	0.04902	19.79	1286	0.10292
19.805	1194	0.08371	19.805	1185	0.08197	19.805	1037	0.1024	19.805	959	0.11053	19.805	867	0.04712	19.805	1201	0.09612
19.82	1139	0.07986	19.82	1152	0.07969	19.82	953	0.0941	19.82	922	0.10627	19.82	828	0.045	19.82	1201	0.09612
19.835	1177	0.08252	19.835	1070	0.07402	19.835	1005	0.09924	19.835	923	0.10639	19.835	810	0.04402	19.835	1148	0.09188
19.85	1025	0.07186	19.85	1044	0.07222	19.85	1016	0.10033	19.85	854	0.09843	19.85	787	0.04277	19.85	1093	0.08747
19.865	1002	0.07025	19.865	1027	0.07104	19.865	913	0.09016	19.865	848	0.09774	19.865	778	0.04228	19.865	1063	0.08507
19.88	992	0.06955	19.88	972	0.06724	19.88	824	0.08137	19.88	824	0.09497	19.88	768	0.04174	19.88	1038	0.08307
19.895	1004	0.07039	19.895	933	0.06454	19.895	861	0.08502	19.895	850	0.09797	19.895	744	0.04044	19.895	1012	0.08099
19.91	964	0.06759	19.91	953	0.06592	19.91	846	0.08354	19.91	785	0.09048	19.91	719	0.03908	19.91	980	0.07843
19.925	887	0.06219	19.925	896	0.06198	19.925	782	0.07722	19.925	785	0.09048	19.925	747	0.0406	19.925	1040	0.08323
19.94	892	0.06254	19.94	902	0.0624	19.94	785	0.07752	19.94	752	0.08668	19.94	696	0.03783	19.94	998	0.07987
19.955	876	0.06142	19.955	916	0.06336	19.955	794	0.0784	19.955	793	0.0914	19.955	641	0.03484	19.955	979	0.07835
19.97	869	0.06093	19.97	840	0.05811	19.97	785	0.07752	19.97	706	0.08137	19.97	655	0.0356	19.97	924	0.07395
19.985	849	0.05952	19.985	844	0.05838	19.985	788	0.07781	19.985	705	0.08126	19.985	636	0.03457	19.985	909	0.07275
20	803	0.0563	20	861	0.05956	20	752	0.07426	20	697	0.08034	20	685	0.03723	20	875	0.07003
20.015	775	0.05434	20.015	863	0.0597	20.015	756	0.07465	20.015	738	0.08506	20.015	654	0.03555	20.015	890	0.07123
20.03	775	0.05434	20.03	854	0.05908	20.03	706	0.06971	20.03	686	0.07907	20.03	651	0.03538	20.03	854	0.06835
20.045	752	0.05272	20.045	837	0.0579	20.045	691	0.06823	20.045	665	0.07665	20.045	639	0.03473	20.045	867	0.06939
20.06	765	0.05364	20.06	848	0.05866	20.06	650	0.06418	20.06	671	0.07734	20.06	640	0.03478	20.06	845	0.06763
20.075	754	0.05286	20.075	867	0.05998	20.075	674	0.06655	20.075	647	0.07457	20.075	621	0.03375	20.075	847	0.06779
20.09	706	0.0495	20.09	796	0.05506	20.09	689	0.06804	20.09	652	0.07515	20.09	590	0.03207	20.09	809	0.06475
20.105	722	0.05062	20.105	825	0.05707	20.105	634	0.0626	20.105	626	0.07215	20.105	600	0.03261	20.105	796	0.06371
20.12	672	0.04711	20.12	812	0.05617	20.12	686	0.06774	20.12	617	0.07112	20.12	575	0.03125	20.12	805	0.06443
20.135	661	0.04634	20.135	791	0.05472	20.135	620	0.06122	20.135	602	0.06939	20.135	571	0.03103	20.135	807	0.06459
20.15	642	0.04501	20.15	777	0.05375	20.15	616	0.06083	20.15	586	0.06754	20.15	591	0.03212	20.15	737	0.05898
20.165	628	0.04403	20.165	757	0.05237	20.165	616	0.06083	20.165	620	0.07146	20.165	575	0.03125	20.165	729	0.05834
20.18	687	0.04817	20.18	745	0.05154	20.18	604	0.05964	20.18	623	0.07181	20.18	557	0.03027	20.18	725	0.05802
20.195	652	0.04571	20.195	749	0.05181	20.195	580	0.05727	20.195	623	0.07181	20.195	543	0.02951	20.195	732	0.05858
20.21	637	0.04466	20.21	737	0.05098	20.21	625	0.06172	20.21	608	0.07008	20.21	534	0.02902	20.21	672	0.05378
20.225	644	0.04515	20.225	659	0.04559	20.225	606	0.05984	20.225	581	0.06697	20.225	530	0.02881	20.225	657	0.05258
20.24	626	0.04389	20.24	678	0.0469	20.24	594	0.05866	20.24	581	0.06697	20.24	484	0.02631	20.24	684	0.05474
20.255	618	0.04333	20.255	648	0.04483	20.255	568	0.05609	20.255	596	0.0687	20.255	480	0.02609	20.255	696	0.0557
20.27	617	0.04326	20.27	639	0.0442	20.27	597	0.05895	20.27	564	0.06501	20.27	487	0.02647	20.27	670	0.05362
20.285	587	0.04116	20.285	592	0.04095	20.285	562	0.0555	20.285	580	0.06685	20.285	489	0.02658	20.285	614	0.04914
20.3	593	0.04158	20.3	584	0.0404	20.3	545	0.05382	20.3	576	0.06639	20.3	503	0.02734	20.3	649	0.05194
20.315	603	0.04228	20.315	612	0.04234	20.315	559	0.0552	20.315	591	0.06812	20.315	522	0.02837	20.315	621	0.0497
20.33	598	0.04193	20.33	589	0.04074	20.33	520	0.05135	20.33	564	0.06501	20.33	522	0.02837	20.33	572	0.04578
20.345	606	0.04249	20.345	581	0.04019	20.345	520	0.05135	20.345	546	0.06293	20.345	518	0.02815	20.345	615	0.04922
20.36	589	0.0413	20.36	587	0.04061	20.36	520	0.05135	20.36	572	0.06593	20.36	484	0.02631	20.36	620	0.04962
20.375	580	0.04066	20.375	545	0.0377	20.375	550	0.05431	20.375	569	0.06558	20.375	492	0.02674	20.375	616	0.0493
20.39	565	0.03961	20.39	534	0.03694	20.39	505	0.04987	20.39	544	0.0627	20.39	485	0.02636	20.39	578	0.04626
20.405	549	0.03849	20.405	543	0.03756	20.405	533	0.05263	20.405	533	0.06143	20.405	464	0.02522	20.405	557	0.04458
20.42	539	0.03779	20.42	517	0.03576	20.42	544	0.05372	20.42	529	0.06097	20.42	526	0.02859	20.42	554	0.04434
20.435	596	0.04179	20.435	526	0.03639	20.435	523	0.05164	20.435	535	0.06166	20.435	484	0.02631	20.435	603	0.04826
20.45	596	0.04179	20.45	529	0.03659	20.45	520	0.05135	20.45	513	0.05913	20.45	488	0.02652	20.45	578	0.04626
20.465	554	0.03884	20.465	524	0.03625	20.465	540	0.05332	20.465	525	0.06051	20.465	475	0.02582	20.465	538	0.04306
20.48	591	0.04144	20.48	507	0.03507	20.48	515	0.05085	20.48	550	0.06339	20.48	466	0.02533	20.48	537	0.04298
20.495	546	0.03828	20.495	473	0.03272	20.495	504	0.04977	20.495	524	0.0604	20.495	461	0.02506	20.495	552	0.04418
20.51	534	0.03744	20.51	532	0.0368	20.51	507	0.05006	20.51	538	0.06201	20.51	453	0.02462	20.51	535	0.04282
20.525	559	0.03919	20.525	503	0.0348	20.525	501	0.04947	20.525	548	0.06316	20.525	463	0.02516	20.525	568	0.04546
20.54	543	0.03807	20.54	498	0.03445	20.54	515	0.05085	20.54	565	0.06512	20.54	474	0.02576	20.54	565	0.04522
20.555	529	0.03709	20.555	499	0.03452	20.555	506	0.04997	20.555	543	0.06259	20.555	455	0.02473	20.555	533	0.04266
20.57	548	0.03842	20.57	510	0.03528	20.57	482	0.0476	20.57	539	0.06213	20.57	452	0.02457	20.57	507	0.04058
20.585	530	0.03716	20.585	532	0.0368	20.585	489	0.04829	20.585	521	0.06005	20.585	450	0.02446	20.585	520	0.04162
20.6	541	0.03793	20.6	480	0.0332	20.6	479	0.0473	20.6	536	0.06178	20.6	448	0.02435	20.6	537	0.04298
20.615	537	0.03765	20.615	489	0.03383	20.615	444	0.04384	20.615	539	0.06213	20.615	449	0.0244	20.615	499	0.03994
20.63	524	0.03674	20.63	503	0.0348	20.63	482	0.0476	20.63	562	0.06478	20.63	451	0.02451	20.63	486	0.0389
20.645	493	0.03456	20.645	493	0.0341	20.645	516	0.05095	20.645	522	0.06017	20.645	442	0.02402	20.645	498	0.03986
20.66	532	0.0373	20.66	471	0.03258	20.66	470	0.04641	20.66	513	0.05913	20.66	439	0.02386	20.66	495	0.03962
20.675	503	0.03527	20.675	495	0.03424	20.675	463	0.04572	20.675	557	0.0642	20.675	428	0.02326	20.675	495	0.03962
20.69	492	0.03449	20.69	512	0.03542	20.69	507	0.05006	20.69	524	0.0604	20.69	434	0.02359	20.69	540	0.04322
20.705	514	0.03604	20.705	494	0.03417	20.705	472	0.04661	20.705	537	0.06189	20.705	427	0.02321	20.705	497	0.03978
20.72	492	0.03449	20.72	505	0.03493	20.72	476	0.047	20.72	553	0.06374	20.72	469	0.02549	20.72	508	0.04066
20.735	517	0.03625	20.735	486	0.03362	20.735	497	0.04908	20.735	529	0.06097	20.735	450	0.02446	20.735	527	0.04218
20.75	487	0.03414	20.75	502	0.03473	20.75	460	0.04542	20.75	497	0.05728	20.75	426	0.02315	20.75	520	0.04162
20.765	498	0.03492	20.765	460	0.03182	20.765	482	0.0476	20.765	489	0.05636	20.765	429	0.02332	20.765	511	0.0409
20.78	535	0.03751	20.78	447	0.03092	20.78	486	0.04799	20.78	503	0.05798	20.78	442	0.02402	20.78	493	0.03946
20.795	508	0.03562	20.795	467	0.0323	20.795	445	0.04394	20.795	522	0.06017	20.795	435	0.02364	20.795	493	0.03946
20.81	461	0.03232	20.81	479	0.03314	20.81	463	0.04572	20.81	521	0.06005	20.81	467	0.02538	20.81	538	0.04306
20.825	498	0.03492	20.825	489	0.03383	20.825	462	0.04562	20.825	488	0.05625	20.825	464	0.02522	20.825	535	0.04282
20.84	551	0.03863	20.84	499	0.03452	20.84	477	0.0471	20.84	495	0.05705	20.84	443	0.02408	20.84	521	0.0417
20.855	479	0.03358	20.855	459	0.03175	20.855	466	0.04602	20.855	526	0.06063	20.855	459	0.02495	20.855	505	0.04042
20.87	486	0.03407	20.87	438	0.0303	20.87	465	0.04592	20.87	538	0.06201	20.87	437	0.02375	20.87	518	0.04146
20.885	521	0.03653	20.885	483	0.03341	20.885	468	0.04621	20.885	515	0.05936	20.885	416	0.02261	20.885	515	0.04122
20.9	504	0.03534	20.9	472	0.03265	20.9	454	0.04483	20.9	492	0.05671	20.9	402	0.02185	20.9	503	0.04026
20.915	464	0.03253	20.915	454	0.03141	20.915	452	0.04463	20.915	525	0.06051	20.915	415	0.02256	20.915	494	0.03954
20.93	480	0.03365	20.93	441	0.03051	20.93	431	0.04256	20.93	512	0.05901	20.93	408	0.02218	20.93	506	0.0405
20.945	504	0.03534	20.945	498	0.03445	20.945	450	0.04444	20.945	495	0.05705	20.945	417	0.02266	20.945	479	0.03834
20.96	546	0.03828	20.96	477	0.033	20.96	460	0.04542	20.96	516	0.05947	20.96	456	0.02478	20.96	464	0.03713
20.975	501	0.03513	20.975	464	0.0321	20.975	457	0.04513	20.975	455	0.05244	20.975	440	0.02391	20.975	481	0.0385
20.99	479	0.03358	20.99	445	0.03078	20.99	429	0.04236	20.99	513	0.05913	20.99	417	0.02266	20.99	480	0.03842
21.005	498	0.03492	21.005	445	0.03078	21.005	427	0.04216	21.005	505	0.05821	21.005	434	0.02359	21.005	484	0.03874
21.02	537	0.03765	21.02	468	0.03237	21.02	412	0.04068	21.02	498	0.0574	21.02	451	0.02451	21.02	471	0.0377
21.035	500	0.03506	21.035	445	0.03078	21.035	455	0.04493	21.035	526	0.06063	21.035	440	0.02391	21.035	442	0.03537
21.05	476	0.03337	21.05	467	0.0323	21.05	414	0.04088	21.05	512	0.05901	21.05	452	0.02457	21.05	466	0.03729
21.065	499	0.03499	21.065	431	0.02981	21.065	430	0.04246	21.065	482	0.05556	21.065	393	0.02136	21.065	452	0.03617
21.08	523	0.03667	21.08	421	0.02912	21.08	442	0.04365	21.08	509	0.05867	21.08	434	0.02359	21.08	461	0.03689
21.095	486	0.03407	21.095	412	0.0285	21.095	433	0.04276	21.095	478	0.05509	21.095	418	0.02272	21.095	465	0.03721
21.11	465	0.0326	21.11	448	0.03099	21.11	395	0.039	21.11	496	0.05717	21.11	414	0.0225	21.11	439	0.03513
21.125	479	0.03358	21.125	450	0.03113	21.125	427	0.04216	21.125	471	0.05429	21.125	423	0.02299	21.125	459	0.03673
21.14	470	0.03295	21.14	432	0.02988	21.14	433	0.04276	21.14	435	0.05014	21.14	418	0.02272	21.14	450	0.03601
21.155	444	0.03113	21.155	398	0.02753	21.155	435	0.04295	21.155	435	0.05014	21.155	400	0.02174	21.155	443	0.03545
21.17	469	0.03288	21.17	437	0.03023	21.17	440	0.04345	21.17	466	0.05371	21.17	371	0.02016	21.17	430	0.03441
21.185	465	0.0326	21.185	451	0.0312	21.185	464	0.04582	21.185	463	0.05337	21.185	389	0.02114	21.185	443	0.03545
21.2	472	0.03309	21.2	427	0.02954	21.2	420	0.04147	21.2	466	0.05371	21.2	400	0.02174	21.2	445	0.03561
21.215	442	0.03099	21.215	417	0.02885	21.215	431	0.04256	21.215	441	0.05083	21.215	396	0.02152	21.215	441	0.03529
21.23	455	0.0319	21.23	427	0.02954	21.23	421	0.04157	21.23	425	0.04899	21.23	398	0.02163	21.23	429	0.03433
21.245	458	0.03211	21.245	430	0.02975	21.245	420	0.04147	21.245	462	0.05325	21.245	399	0.02169	21.245	480	0.03842
21.26	474	0.03323	21.26	412	0.0285	21.26	440	0.04345	21.26	454	0.05233	21.26	408	0.02218	21.26	465	0.03721
21.275	478	0.03351	21.275	430	0.02975	21.275	410	0.04049	21.275	473	0.05452	21.275	403	0.0219	21.275	431	0.03449
21.29	496	0.03478	21.29	421	0.02912	21.29	398	0.0393	21.29	463	0.05337	21.29	401	0.02179	21.29	439	0.03513
21.305	488	0.03421	21.305	414	0.02864	21.305	398	0.0393	21.305	491	0.05659	21.305	396	0.02152	21.305	455	0.03641
21.32	485	0.034	21.32	414	0.02864	21.32	409	0.04039	21.32	479	0.05521	21.32	405	0.02201	21.32	457	0.03657
21.335	469	0.03288	21.335	425	0.0294	21.335	425	0.04197	21.335	475	0.05475	21.335	423	0.02299	21.335	436	0.03489
21.35	452	0.03169	21.35	436	0.03016	21.35	429	0.04236	21.35	471	0.05429	21.35	392	0.02131	21.35	434	0.03473
21.365	445	0.0312	21.365	410	0.02836	21.365	422	0.04167	21.365	473	0.05452	21.365	374	0.02033	21.365	432	0.03457
21.38	463	0.03246	21.38	406	0.02809	21.38	407	0.04019	21.38	477	0.05498	21.38	417	0.02266	21.38	435	0.03481
21.395	453	0.03176	21.395	419	0.02898	21.395	396	0.0391	21.395	487	0.05613	21.395	382	0.02076	21.395	436	0.03489
21.41	460	0.03225	21.41	421	0.02912	21.41	404	0.03989	21.41	484	0.05579	21.41	392	0.02131	21.41	449	0.03593
21.425	473	0.03316	21.425	431	0.02981	21.425	403	0.03979	21.425	478	0.05509	21.425	389	0.02114	21.425	467	0.03737
21.44	437	0.03064	21.44	423	0.02926	21.44	396	0.0391	21.44	448	0.05164	21.44	387	0.02103	21.44	451	0.03609
21.455	458	0.03211	21.455	434	0.03002	21.455	408	0.04029	21.455	462	0.05325	21.455	396	0.02152	21.455	434	0.03473
21.47	461	0.03232	21.47	411	0.02843	21.47	402	0.0397	21.47	441	0.05083	21.47	402	0.02185	21.47	450	0.03601
21.485	479	0.03358	21.485	453	0.03134	21.485	403	0.03979	21.485	445	0.05129	21.485	410	0.02228	21.485	415	0.03321
21.5	465	0.0326	21.5	389	0.02691	21.5	401	0.0396	21.5	452	0.0521	21.5	380	0.02065	21.5	433	0.03465
21.515	472	0.03309	21.515	402	0.02781	21.515	413	0.04078	21.515	483	0.05567	21.515	401	0.02179	21.515	436	0.03489
21.53	477	0.03344	21.53	382	0.02643	21.53	436	0.04305	21.53	494	0.05694	21.53	404	0.02196	21.53	456	0.03649
21.545	444	0.03113	21.545	367	0.02539	21.545	452	0.04463	21.545	480	0.05533	21.545	350	0.01902	21.545	424	0.03393
21.56	463	0.03246	21.56	424	0.02933	21.56	425	0.04197	21.56	470	0.05417	21.56	406	0.02207	21.56	431	0.03449
21.575	450	0.03155	21.575	420	0.02905	21.575	429	0.04236	21.575	463	0.05337	21.575	439	0.02386	21.575	457	0.03657
21.59	454	0.03183	21.59	396	0.02739	21.59	445	0.04394	21.59	466	0.05371	21.59	395	0.02147	21.59	452	0.03617
21.605	445	0.0312	21.605	406	0.02809	21.605	426	0.04207	21.605	484	0.05579	21.605	419	0.02277	21.605	480	0.03842
21.62	475	0.0333	21.62	460	0.03182	21.62	464	0.04582	21.62	495	0.05705	21.62	401	0.02179	21.62	443	0.03545
21.635	438	0.03071	21.635	425	0.0294	21.635	426	0.04207	21.635	472	0.0544	21.635	386	0.02098	21.635	398	0.03185
21.65	481	0.03372	21.65	414	0.02864	21.65	413	0.04078	21.65	478	0.05509	21.65	399	0.02169	21.65	402	0.03217
21.665	433	0.03036	21.665	417	0.02885	21.665	403	0.03979	21.665	462	0.05325	21.665	374	0.02033	21.665	394	0.03153
21.68	459	0.03218	21.68	420	0.02905	21.68	418	0.04128	21.68	465	0.0536	21.68	351	0.01908	21.68	411	0.03289
21.695	466	0.03267	21.695	420	0.02905	21.695	384	0.03792	21.695	476	0.05486	21.695	400	0.02174	21.695	405	0.03241
21.71	454	0.03183	21.71	413	0.02857	21.71	385	0.03802	21.71	450	0.05187	21.71	381	0.02071	21.71	431	0.03449
21.725	453	0.03176	21.725	431	0.02981	21.725	433	0.04276	21.725	471	0.05429	21.725	408	0.02218	21.725	432	0.03457
21.74	473	0.03316	21.74	421	0.02912	21.74	431	0.04256	21.74	483	0.05567	21.74	433	0.02353	21.74	397	0.03177
21.755	448	0.03141	21.755	454	0.03141	21.755	434	0.04286	21.755	470	0.05417	21.755	382	0.02076	21.755	416	0.03329
21.77	473	0.03316	21.77	440	0.03044	21.77	436	0.04305	21.77	469	0.05406	21.77	400	0.02174	21.77	415	0.03321
21.785	465	0.0326	21.785	407	0.02815	21.785	449	0.04434	21.785	444	0.05118	21.785	389	0.02114	21.785	414	0.03313
21.8	440	0.03085	21.8	416	0.02878	21.8	423	0.04177	21.8	471	0.05429	21.8	393	0.02136	21.8	423	0.03385
21.815	462	0.03239	21.815	421	0.02912	21.815	430	0.04246	21.815	463	0.05337	21.815	362	0.01967	21.815	446	0.03569
21.83	470	0.03295	21.83	418	0.02892	21.83	449	0.04434	21.83	442	0.05095	21.83	380	0.02065	21.83	460	0.03681
21.845	462	0.03239	21.845	402	0.02781	21.845	432	0.04266	21.845	433	0.04991	21.845	393	0.02136	21.845	471	0.0377
21.86	460	0.03225	21.86	422	0.02919	21.86	425	0.04197	21.86	437	0.05037	21.86	380	0.02065	21.86	425	0.03401
21.875	447	0.03134	21.875	402	0.02781	21.875	421	0.04157	21.875	481	0.05544	21.875	390	0.0212	21.875	450	0.03601
21.89	435	0.0305	21.89	395	0.02732	21.89	413	0.04078	21.89	542	0.06247	21.89	393	0.02136	21.89	415	0.03321
21.905	459	0.03218	21.905	446	0.03085	21.905	432	0.04266	21.905	510	0.05878	21.905	414	0.0225	21.905	435	0.03481
21.92	435	0.0305	21.92	397	0.02746	21.92	414	0.04088	21.92	471	0.05429	21.92	418	0.02272	21.92	435	0.03481
21.935	439	0.03078	21.935	400	0.02767	21.935	416	0.04108	21.935	473	0.05452	21.935	395	0.02147	21.935	419	0.03353
21.95	389	0.02727	21.95	407	0.02815	21.95	446	0.04404	21.95	462	0.05325	21.95	400	0.02174	21.95	423	0.03385
21.965	465	0.0326	21.965	428	0.02961	21.965	403	0.03979	21.965	458	0.05279	21.965	377	0.02049	21.965	432	0.03457
21.98	475	0.0333	21.98	409	0.02829	21.98	437	0.04315	21.98	489	0.05636	21.98	373	0.02027	21.98	429	0.03433
21.995	459	0.03218	21.995	417	0.02885	21.995	437	0.04315	21.995	485	0.0559	21.995	387	0.02103	21.995	458	0.03665
22.01	451	0.03162	22.01	440	0.03044	22.01	430	0.04246	22.01	503	0.05798	22.01	397	0.02158	22.01	467	0.03737
22.025	433	0.03036	22.025	423	0.02926	22.025	455	0.04493	22.025	451	0.05198	22.025	391	0.02125	22.025	452	0.03617
22.04	436	0.03057	22.04	414	0.02864	22.04	403	0.03979	22.04	479	0.05521	22.04	400	0.02174	22.04	456	0.03649
22.055	458	0.03211	22.055	386	0.0267	22.055	410	0.04049	22.055	457	0.05267	22.055	422	0.02294	22.055	465	0.03721
22.07	454	0.03183	22.07	391	0.02705	22.07	416	0.04108	22.07	424	0.04887	22.07	381	0.02071	22.07	452	0.03617
22.085	491	0.03442	22.085	409	0.02829	22.085	416	0.04108	22.085	466	0.05371	22.085	402	0.02185	22.085	429	0.03433
22.1	414	0.02903	22.1	379	0.02622	22.1	397	0.0392	22.1	442	0.05095	22.1	400	0.02174	22.1	464	0.03713
22.115	431	0.03022	22.115	397	0.02746	22.115	400	0.0395	22.115	423	0.04876	22.115	375	0.02038	22.115	435	0.03481
22.13	452	0.03169	22.13	409	0.02829	22.13	409	0.04039	22.13	453	0.05221	22.13	402	0.02185	22.13	481	0.0385
22.145	431	0.03022	22.145	366	0.02532	22.145	424	0.04187	22.145	445	0.05129	22.145	338	0.01837	22.145	425	0.03401
22.16	410	0.02875	22.16	396	0.02739	22.16	423	0.04177	22.16	450	0.05187	22.16	384	0.02087	22.16	391	0.03129
22.175	438	0.03071	22.175	408	0.02822	22.175	416	0.04108	22.175	425	0.04899	22.175	381	0.02071	22.175	443	0.03545
22.19	421	0.02952	22.19	405	0.02802	22.19	426	0.04207	22.19	442	0.05095	22.19	431	0.02343	22.19	405	0.03241
22.205	453	0.03176	22.205	403	0.02788	22.205	405	0.03999	22.205	479	0.05521	22.205	386	0.02098	22.205	432	0.03457
22.22	446	0.03127	22.22	415	0.02871	22.22	363	0.03584	22.22	483	0.05567	22.22	369	0.02006	22.22	415	0.03321
22.235	422	0.02959	22.235	392	0.02712	22.235	389	0.03841	22.235	440	0.05071	22.235	391	0.02125	22.235	400	0.03201
22.25	429	0.03008	22.25	429	0.02968	22.25	414	0.04088	22.25	453	0.05221	22.25	400	0.02174	22.25	432	0.03457
22.265	440	0.03085	22.265	418	0.02892	22.265	395	0.039	22.265	452	0.0521	22.265	382	0.02076	22.265	434	0.03473
22.28	422	0.02959	22.28	418	0.02892	22.28	416	0.04108	22.28	466	0.05371	22.28	368	0.02	22.28	409	0.03273
22.295	420	0.02945	22.295	379	0.02622	22.295	419	0.04137	22.295	456	0.05256	22.295	387	0.02103	22.295	388	0.03105
22.31	408	0.02861	22.31	415	0.02871	22.31	413	0.04078	22.31	438	0.05048	22.31	374	0.02033	22.31	398	0.03185
22.325	415	0.0291	22.325	400	0.02767	22.325	414	0.04088	22.325	479	0.05521	22.325	379	0.0206	22.325	405	0.03241
22.34	402	0.02818	22.34	370	0.02559	22.34	434	0.04286	22.34	455	0.05244	22.34	374	0.02033	22.34	397	0.03177
22.355	438	0.03071	22.355	383	0.02649	22.355	400	0.0395	22.355	464	0.05348	22.355	403	0.0219	22.355	438	0.03505
22.37	457	0.03204	22.37	407	0.02815	22.37	413	0.04078	22.37	446	0.05141	22.37	365	0.01984	22.37	430	0.03441
22.385	421	0.02952	22.385	401	0.02774	22.385	418	0.04128	22.385	419	0.04829	22.385	357	0.0194	22.385	416	0.03329
22.4	422	0.02959	22.4	406	0.02809	22.4	429	0.04236	22.4	441	0.05083	22.4	369	0.02006	22.4	389	0.03113
22.415	432	0.03029	22.415	413	0.02857	22.415	415	0.04098	22.415	432	0.04979	22.415	378	0.02054	22.415	432	0.03457
22.43	424	0.02973	22.43	389	0.02691	22.43	386	0.03812	22.43	426	0.0491	22.43	354	0.01924	22.43	415	0.03321
22.445	437	0.03064	22.445	422	0.02919	22.445	383	0.03782	22.445	450	0.05187	22.445	375	0.02038	22.445	413	0.03305
22.46	440	0.03085	22.46	401	0.02774	22.46	404	0.03989	22.46	451	0.05198	22.46	376	0.02044	22.46	438	0.03505
22.475	450	0.03155	22.475	388	0.02684	22.475	422	0.04167	22.475	445	0.05129	22.475	380	0.02065	22.475	430	0.03441
22.49	471	0.03302	22.49	401	0.02774	22.49	395	0.039	22.49	449	0.05175	22.49	388	0.02109	22.49	436	0.03489
22.505	434	0.03043	22.505	389	0.02691	22.505	422	0.04167	22.505	443	0.05106	22.505	373	0.02027	22.505	388	0.03105
22.52	448	0.03141	22.52	371	0.02566	22.52	409	0.04039	22.52	440	0.05071	22.52	390	0.0212	22.52	407	0.03257
22.535	440	0.03085	22.535	387	0.02677	22.535	391	0.03861	22.535	427	0.04922	22.535	398	0.02163	22.535	420	0.03361
22.55	443	0.03106	22.55	376	0.02601	22.55	392	0.03871	22.55	452	0.0521	22.55	368	0.02	22.55	388	0.03105
22.565	421	0.02952	22.565	404	0.02795	22.565	393	0.03881	22.565	455	0.05244	22.565	372	0.02022	22.565	394	0.03153
22.58	431	0.03022	22.58	403	0.02788	22.58	421	0.04157	22.58	456	0.05256	22.58	372	0.02022	22.58	432	0.03457
22.595	446	0.03127	22.595	387	0.02677	22.595	381	0.03762	22.595	490	0.05648	22.595	390	0.0212	22.595	426	0.03409
22.61	452	0.03169	22.61	399	0.0276	22.61	421	0.04157	22.61	482	0.05556	22.61	378	0.02054	22.61	399	0.03193
22.625	449	0.03148	22.625	418	0.02892	22.625	416	0.04108	22.625	452	0.0521	22.625	378	0.02054	22.625	408	0.03265
22.64	408	0.02861	22.64	394	0.02726	22.64	406	0.04009	22.64	488	0.05625	22.64	399	0.02169	22.64	366	0.02929
22.655	421	0.02952	22.655	411	0.02843	22.655	415	0.04098	22.655	451	0.05198	22.655	421	0.02288	22.655	401	0.03209
22.67	459	0.03218	22.67	394	0.02726	22.67	436	0.04305	22.67	419	0.04829	22.67	403	0.0219	22.67	414	0.03313
22.685	456	0.03197	22.685	376	0.02601	22.685	440	0.04345	22.685	441	0.05083	22.685	390	0.0212	22.685	401	0.03209
22.7	457	0.03204	22.7	381	0.02636	22.7	386	0.03812	22.7	437	0.05037	22.7	398	0.02163	22.7	400	0.03201
22.715	461	0.03232	22.715	394	0.02726	22.715	391	0.03861	22.715	436	0.05025	22.715	408	0.02218	22.715	424	0.03393
22.73	467	0.03274	22.73	406	0.02809	22.73	410	0.04049	22.73	442	0.05095	22.73	380	0.02065	22.73	411	0.03289
22.745	489	0.03428	22.745	393	0.02719	22.745	389	0.03841	22.745	459	0.0529	22.745	394	0.02141	22.745	403	0.03225
22.76	446	0.03127	22.76	406	0.02809	22.76	385	0.03802	22.76	464	0.05348	22.76	388	0.02109	22.76	419	0.03353
22.775	417	0.02924	22.775	405	0.02802	22.775	410	0.04049	22.775	423	0.04876	22.775	384	0.02087	22.775	413	0.03305
22.79	400	0.02804	22.79	398	0.02753	22.79	415	0.04098	22.79	446	0.05141	22.79	394	0.02141	22.79	425	0.03401
22.805	419	0.02938	22.805	420	0.02905	22.805	417	0.04118	22.805	474	0.05463	22.805	386	0.02098	22.805	424	0.03393
22.82	443	0.03106	22.82	391	0.02705	22.82	411	0.04058	22.82	490	0.05648	22.82	376	0.02044	22.82	420	0.03361
22.835	420	0.02945	22.835	406	0.02809	22.835	402	0.0397	22.835	442	0.05095	22.835	399	0.02169	22.835	433	0.03465
22.85	433	0.03036	22.85	407	0.02815	22.85	392	0.03871	22.85	442	0.05095	22.85	400	0.02174	22.85	392	0.03137
22.865	425	0.0298	22.865	410	0.02836	22.865	395	0.039	22.865	472	0.0544	22.865	384	0.02087	22.865	395	0.03161
22.88	432	0.03029	22.88	400	0.02767	22.88	379	0.03742	22.88	452	0.0521	22.88	405	0.02201	22.88	420	0.03361
22.895	435	0.0305	22.895	375	0.02594	22.895	414	0.04088	22.895	441	0.05083	22.895	391	0.02125	22.895	418	0.03345
22.91	432	0.03029	22.91	421	0.02912	22.91	394	0.03891	22.91	445	0.05129	22.91	415	0.02256	22.91	379	0.03033
22.925	420	0.02945	22.925	408	0.02822	22.925	409	0.04039	22.925	437	0.05037	22.925	395	0.02147	22.925	382	0.03057
22.94	422	0.02959	22.94	426	0.02947	22.94	393	0.03881	22.94	440	0.05071	22.94	393	0.02136	22.94	429	0.03433
22.955	459	0.03218	22.955	403	0.02788	22.955	431	0.04256	22.955	444	0.05118	22.955	392	0.02131	22.955	447	0.03577
22.97	461	0.03232	22.97	403	0.02788	22.97	407	0.04019	22.97	461	0.05314	22.97	407	0.02212	22.97	450	0.03601
22.985	436	0.03057	22.985	427	0.02954	22.985	390	0.03851	22.985	456	0.05256	22.985	386	0.02098	22.985	410	0.03281
23	420	0.02945	23	389	0.02691	23	412	0.04068	23	455	0.05244	23	371	0.02016	23	407	0.03257
23.015	420	0.02945	23.015	417	0.02885	23.015	412	0.04068	23.015	447	0.05152	23.015	407	0.02212	23.015	389	0.03113
23.03	419	0.02938	23.03	418	0.02892	23.03	391	0.03861	23.03	455	0.05244	23.03	397	0.02158	23.03	386	0.03089
23.045	429	0.03008	23.045	399	0.0276	23.045	408	0.04029	23.045	446	0.05141	23.045	401	0.02179	23.045	448	0.03585
23.06	426	0.02987	23.06	400	0.02767	23.06	449	0.04434	23.06	451	0.05198	23.06	371	0.02016	23.06	435	0.03481
23.075	420	0.02945	23.075	392	0.02712	23.075	389	0.03841	23.075	474	0.05463	23.075	375	0.02038	23.075	407	0.03257
23.09	442	0.03099	23.09	417	0.02885	23.09	396	0.0391	23.09	464	0.05348	23.09	380	0.02065	23.09	435	0.03481
23.105	458	0.03211	23.105	396	0.02739	23.105	384	0.03792	23.105	434	0.05002	23.105	402	0.02185	23.105	425	0.03401
23.12	436	0.03057	23.12	402	0.02781	23.12	377	0.03723	23.12	464	0.05348	23.12	377	0.02049	23.12	373	0.02985
23.135	428	0.03001	23.135	419	0.02898	23.135	371	0.03663	23.135	435	0.05014	23.135	382	0.02076	23.135	372	0.02977
23.15	397	0.02783	23.15	388	0.02684	23.15	404	0.03989	23.15	420	0.04841	23.15	370	0.02011	23.15	397	0.03177
23.165	411	0.02882	23.165	378	0.02615	23.165	388	0.03831	23.165	430	0.04956	23.165	349	0.01897	23.165	385	0.03081
23.18	460	0.03225	23.18	407	0.02815	23.18	384	0.03792	23.18	422	0.04864	23.18	375	0.02038	23.18	397	0.03177
23.195	420	0.02945	23.195	393	0.02719	23.195	363	0.03584	23.195	436	0.05025	23.195	367	0.01995	23.195	405	0.03241
23.21	400	0.02804	23.21	406	0.02809	23.21	351	0.03466	23.21	431	0.04968	23.21	379	0.0206	23.21	438	0.03505
23.225	417	0.02924	23.225	394	0.02726	23.225	359	0.03545	23.225	435	0.05014	23.225	395	0.02147	23.225	377	0.03017
23.24	389	0.02727	23.24	399	0.0276	23.24	408	0.04029	23.24	458	0.05279	23.24	369	0.02006	23.24	408	0.03265
23.255	419	0.02938	23.255	414	0.02864	23.255	436	0.04305	23.255	439	0.0506	23.255	395	0.02147	23.255	428	0.03425
23.27	423	0.02966	23.27	398	0.02753	23.27	418	0.04128	23.27	452	0.0521	23.27	389	0.02114	23.27	448	0.03585
23.285	448	0.03141	23.285	369	0.02553	23.285	394	0.03891	23.285	420	0.04841	23.285	395	0.02147	23.285	429	0.03433
23.3	404	0.02833	23.3	382	0.02643	23.3	388	0.03831	23.3	416	0.04795	23.3	396	0.02152	23.3	422	0.03377
23.315	425	0.0298	23.315	419	0.02898	23.315	414	0.04088	23.315	418	0.04818	23.315	338	0.01837	23.315	396	0.03169
23.33	424	0.02973	23.33	406	0.02809	23.33	426	0.04207	23.33	481	0.05544	23.33	379	0.0206	23.33	409	0.03273
23.345	434	0.03043	23.345	375	0.02594	23.345	395	0.039	23.345	441	0.05083	23.345	362	0.01967	23.345	410	0.03281
23.36	420	0.02945	23.36	392	0.02712	23.36	374	0.03693	23.36	433	0.04991	23.36	375	0.02038	23.36	389	0.03113
23.375	400	0.02804	23.375	389	0.02691	23.375	376	0.03713	23.375	429	0.04945	23.375	406	0.02207	23.375	406	0.03249
23.39	413	0.02896	23.39	392	0.02712	23.39	400	0.0395	23.39	447	0.05152	23.39	373	0.02027	23.39	429	0.03433
23.405	447	0.03134	23.405	392	0.02712	23.405	403	0.03979	23.405	443	0.05106	23.405	352	0.01913	23.405	411	0.03289
23.42	442	0.03099	23.42	387	0.02677	23.42	396	0.0391	23.42	450	0.05187	23.42	347	0.01886	23.42	394	0.03153
23.435	391	0.02741	23.435	388	0.02684	23.435	382	0.03772	23.435	440	0.05071	23.435	380	0.02065	23.435	405	0.03241
23.45	431	0.03022	23.45	378	0.02615	23.45	396	0.0391	23.45	417	0.04806	23.45	350	0.01902	23.45	394	0.03153
23.465	459	0.03218	23.465	379	0.02622	23.465	379	0.03742	23.465	433	0.04991	23.465	344	0.0187	23.465	396	0.03169
23.48	421	0.02952	23.48	377	0.02608	23.48	385	0.03802	23.48	441	0.05083	23.48	382	0.02076	23.48	365	0.02921
23.495	402	0.02818	23.495	397	0.02746	23.495	379	0.03742	23.495	405	0.04668	23.495	360	0.01957	23.495	425	0.03401
23.51	411	0.02882	23.51	384	0.02656	23.51	373	0.03683	23.51	420	0.04841	23.51	348	0.01891	23.51	403	0.03225
23.525	445	0.0312	23.525	413	0.02857	23.525	399	0.0394	23.525	456	0.05256	23.525	368	0.02	23.525	393	0.03145
23.54	418	0.02931	23.54	375	0.02594	23.54	395	0.039	23.54	439	0.0506	23.54	386	0.02098	23.54	394	0.03153
23.555	405	0.0284	23.555	398	0.02753	23.555	401	0.0396	23.555	398	0.04587	23.555	408	0.02218	23.555	377	0.03017
23.57	429	0.03008	23.57	431	0.02981	23.57	404	0.03989	23.57	420	0.04841	23.57	385	0.02093	23.57	380	0.03041
23.585	439	0.03078	23.585	412	0.0285	23.585	372	0.03673	23.585	458	0.05279	23.585	386	0.02098	23.585	421	0.03369
23.6	441	0.03092	23.6	404	0.02795	23.6	379	0.03742	23.6	466	0.05371	23.6	392	0.02131	23.6	399	0.03193
23.615	405	0.0284	23.615	382	0.02643	23.615	375	0.03703	23.615	456	0.05256	23.615	338	0.01837	23.615	396	0.03169
23.63	429	0.03008	23.63	375	0.02594	23.63	381	0.03762	23.63	465	0.0536	23.63	360	0.01957	23.63	388	0.03105
23.645	427	0.02994	23.645	399	0.0276	23.645	396	0.0391	23.645	420	0.04841	23.645	366	0.01989	23.645	393	0.03145
23.66	430	0.03015	23.66	384	0.02656	23.66	378	0.03733	23.66	424	0.04887	23.66	374	0.02033	23.66	374	0.02993
23.675	430	0.03015	23.675	395	0.02732	23.675	380	0.03752	23.675	465	0.0536	23.675	372	0.02022	23.675	382	0.03057
23.69	418	0.02931	23.69	398	0.02753	23.69	368	0.03634	23.69	472	0.0544	23.69	392	0.02131	23.69	388	0.03105
23.705	428	0.03001	23.705	394	0.02726	23.705	398	0.0393	23.705	449	0.05175	23.705	391	0.02125	23.705	385	0.03081
23.72	455	0.0319	23.72	377	0.02608	23.72	394	0.03891	23.72	428	0.04933	23.72	376	0.02044	23.72	391	0.03129
23.735	441	0.03092	23.735	418	0.02892	23.735	397	0.0392	23.735	450	0.05187	23.735	387	0.02103	23.735	411	0.03289
23.75	413	0.02896	23.75	409	0.02829	23.75	406	0.04009	23.75	445	0.05129	23.75	392	0.02131	23.75	406	0.03249
23.765	445	0.0312	23.765	384	0.02656	23.765	393	0.03881	23.765	441	0.05083	23.765	393	0.02136	23.765	393	0.03145
23.78	413	0.02896	23.78	375	0.02594	23.78	415	0.04098	23.78	422	0.04864	23.78	394	0.02141	23.78	430	0.03441
23.795	440	0.03085	23.795	400	0.02767	23.795	409	0.04039	23.795	431	0.04968	23.795	374	0.02033	23.795	407	0.03257
23.81	429	0.03008	23.81	402	0.02781	23.81	370	0.03654	23.81	457	0.05267	23.81	386	0.02098	23.81	399	0.03193
23.825	405	0.0284	23.825	360	0.0249	23.825	403	0.03979	23.825	440	0.05071	23.825	397	0.02158	23.825	421	0.03369
23.84	423	0.02966	23.84	389	0.02691	23.84	390	0.03851	23.84	472	0.0544	23.84	373	0.02027	23.84	411	0.03289
23.855	409	0.02868	23.855	393	0.02719	23.855	384	0.03792	23.855	436	0.05025	23.855	373	0.02027	23.855	425	0.03401
23.87	442	0.03099	23.87	423	0.02926	23.87	375	0.03703	23.87	444	0.05118	23.87	359	0.01951	23.87	404	0.03233
23.885	424	0.02973	23.885	393	0.02719	23.885	387	0.03821	23.885	420	0.04841	23.885	387	0.02103	23.885	416	0.03329
23.9	419	0.02938	23.9	390	0.02698	23.9	381	0.03762	23.9	462	0.05325	23.9	378	0.02054	23.9	403	0.03225
23.915	425	0.0298	23.915	410	0.02836	23.915	383	0.03782	23.915	455	0.05244	23.915	420	0.02283	23.915	422	0.03377
23.93	417	0.02924	23.93	394	0.02726	23.93	383	0.03782	23.93	479	0.05521	23.93	409	0.02223	23.93	417	0.03337
23.945	428	0.03001	23.945	395	0.02732	23.945	380	0.03752	23.945	427	0.04922	23.945	401	0.02179	23.945	415	0.03321
23.96	436	0.03057	23.96	379	0.02622	23.96	383	0.03782	23.96	438	0.05048	23.96	396	0.02152	23.96	431	0.03449
23.975	436	0.03057	23.975	447	0.03092	23.975	393	0.03881	23.975	445	0.05129	23.975	377	0.02049	23.975	432	0.03457
23.99	457	0.03204	23.99	400	0.02767	23.99	388	0.03831	23.99	472	0.0544	23.99	404	0.02196	23.99	395	0.03161
24.005	414	0.02903	24.005	385	0.02663	24.005	400	0.0395	24.005	461	0.05314	24.005	384	0.02087	24.005	396	0.03169
24.02	408	0.02861	24.02	405	0.02802	24.02	381	0.03762	24.02	480	0.05533	24.02	409	0.02223	24.02	415	0.03321
24.035	403	0.02825	24.035	378	0.02615	24.035	401	0.0396	24.035	449	0.05175	24.035	366	0.01989	24.035	412	0.03297
24.05	422	0.02959	24.05	375	0.02594	24.05	389	0.03841	24.05	458	0.05279	24.05	386	0.02098	24.05	411	0.03289
24.065	420	0.02945	24.065	418	0.02892	24.065	401	0.0396	24.065	437	0.05037	24.065	400	0.02174	24.065	384	0.03073
24.08	450	0.03155	24.08	397	0.02746	24.08	395	0.039	24.08	459	0.0529	24.08	367	0.01995	24.08	403	0.03225
24.095	416	0.02917	24.095	394	0.02726	24.095	363	0.03584	24.095	465	0.0536	24.095	359	0.01951	24.095	420	0.03361
24.11	430	0.03015	24.11	373	0.0258	24.11	372	0.03673	24.11	457	0.05267	24.11	360	0.01957	24.11	423	0.03385
24.125	401	0.02811	24.125	392	0.02712	24.125	387	0.03821	24.125	442	0.05095	24.125	346	0.01881	24.125	403	0.03225
24.14	433	0.03036	24.14	378	0.02615	24.14	374	0.03693	24.14	426	0.0491	24.14	368	0.02	24.14	417	0.03337
24.155	433	0.03036	24.155	380	0.02629	24.155	350	0.03456	24.155	400	0.0461	24.155	357	0.0194	24.155	403	0.03225
24.17	411	0.02882	24.17	377	0.02608	24.17	392	0.03871	24.17	428	0.04933	24.17	370	0.02011	24.17	392	0.03137
24.185	384	0.02692	24.185	388	0.02684	24.185	390	0.03851	24.185	461	0.05314	24.185	341	0.01853	24.185	408	0.03265
24.2	411	0.02882	24.2	392	0.02712	24.2	367	0.03624	24.2	468	0.05394	24.2	354	0.01924	24.2	431	0.03449
24.215	421	0.02952	24.215	410	0.02836	24.215	364	0.03594	24.215	444	0.05118	24.215	363	0.01973	24.215	389	0.03113
24.23	440	0.03085	24.23	406	0.02809	24.23	378	0.03733	24.23	441	0.05083	24.23	370	0.02011	24.23	398	0.03185
24.245	376	0.02636	24.245	392	0.02712	24.245	348	0.03436	24.245	419	0.04829	24.245	370	0.02011	24.245	409	0.03273
24.26	429	0.03008	24.26	390	0.02698	24.26	362	0.03575	24.26	423	0.04876	24.26	377	0.02049	24.26	397	0.03177
24.275	411	0.02882	24.275	384	0.02656	24.275	381	0.03762	24.275	437	0.05037	24.275	383	0.02082	24.275	403	0.03225
24.29	429	0.03008	24.29	385	0.02663	24.29	393	0.03881	24.29	444	0.05118	24.29	382	0.02076	24.29	416	0.03329
24.305	442	0.03099	24.305	360	0.0249	24.305	411	0.04058	24.305	415	0.04783	24.305	383	0.02082	24.305	425	0.03401
24.32	431	0.03022	24.32	400	0.02767	24.32	406	0.04009	24.32	426	0.0491	24.32	376	0.02044	24.32	429	0.03433
24.335	416	0.02917	24.335	411	0.02843	24.335	398	0.0393	24.335	429	0.04945	24.335	344	0.0187	24.335	375	0.03001
24.35	398	0.0279	24.35	390	0.02698	24.35	410	0.04049	24.35	420	0.04841	24.35	339	0.01842	24.35	362	0.02897
24.365	398	0.0279	24.365	403	0.02788	24.365	372	0.03673	24.365	410	0.04726	24.365	367	0.01995	24.365	426	0.03409
24.38	422	0.02959	24.38	414	0.02864	24.38	370	0.03654	24.38	424	0.04887	24.38	362	0.01967	24.38	421	0.03369
24.395	417	0.02924	24.395	397	0.02746	24.395	358	0.03535	24.395	449	0.05175	24.395	372	0.02022	24.395	417	0.03337
24.41	426	0.02987	24.41	386	0.0267	24.41	384	0.03792	24.41	437	0.05037	24.41	358	0.01946	24.41	416	0.03329
24.425	418	0.02931	24.425	388	0.02684	24.425	397	0.0392	24.425	422	0.04864	24.425	357	0.0194	24.425	411	0.03289
24.44	446	0.03127	24.44	416	0.02878	24.44	396	0.0391	24.44	403	0.04645	24.44	358	0.01946	24.44	410	0.03281
24.455	461	0.03232	24.455	407	0.02815	24.455	390	0.03851	24.455	401	0.04622	24.455	368	0.02	24.455	379	0.03033
24.47	424	0.02973	24.47	407	0.02815	24.47	392	0.03871	24.47	437	0.05037	24.47	390	0.0212	24.47	395	0.03161
24.485	406	0.02847	24.485	380	0.02629	24.485	412	0.04068	24.485	450	0.05187	24.485	363	0.01973	24.485	429	0.03433
24.5	411	0.02882	24.5	408	0.02822	24.5	411	0.04058	24.5	440	0.05071	24.5	381	0.02071	24.5	443	0.03545
24.515	431	0.03022	24.515	373	0.0258	24.515	356	0.03515	24.515	437	0.05037	24.515	349	0.01897	24.515	414	0.03313
24.53	440	0.03085	24.53	400	0.02767	24.53	387	0.03821	24.53	447	0.05152	24.53	340	0.01848	24.53	396	0.03169
24.545	433	0.03036	24.545	387	0.02677	24.545	398	0.0393	24.545	414	0.04772	24.545	367	0.01995	24.545	424	0.03393
24.56	396	0.02776	24.56	405	0.02802	24.56	381	0.03762	24.56	442	0.05095	24.56	377	0.02049	24.56	414	0.03313
24.575	416	0.02917	24.575	395	0.02732	24.575	369	0.03644	24.575	441	0.05083	24.575	416	0.02261	24.575	437	0.03497
24.59	428	0.03001	24.59	393	0.02719	24.59	381	0.03762	24.59	441	0.05083	24.59	381	0.02071	24.59	423	0.03385
24.605	420	0.02945	24.605	397	0.02746	24.605	392	0.03871	24.605	440	0.05071	24.605	377	0.02049	24.605	399	0.03193
24.62	394	0.02762	24.62	414	0.02864	24.62	392	0.03871	24.62	451	0.05198	24.62	355	0.01929	24.62	439	0.03513
24.635	421	0.02952	24.635	423	0.02926	24.635	413	0.04078	24.635	462	0.05325	24.635	358	0.01946	24.635	411	0.03289
24.65	430	0.03015	24.65	401	0.02774	24.65	390	0.03851	24.65	461	0.05314	24.65	352	0.01913	24.65	402	0.03217
24.665	439	0.03078	24.665	395	0.02732	24.665	397	0.0392	24.665	447	0.05152	24.665	364	0.01978	24.665	399	0.03193
24.68	398	0.0279	24.68	415	0.02871	24.68	390	0.03851	24.68	472	0.0544	24.68	338	0.01837	24.68	422	0.03377
24.695	426	0.02987	24.695	401	0.02774	24.695	370	0.03654	24.695	443	0.05106	24.695	358	0.01946	24.695	407	0.03257
24.71	437	0.03064	24.71	412	0.0285	24.71	406	0.04009	24.71	453	0.05221	24.71	379	0.0206	24.71	361	0.02889
24.725	454	0.03183	24.725	412	0.0285	24.725	385	0.03802	24.725	434	0.05002	24.725	352	0.01913	24.725	417	0.03337
24.74	414	0.02903	24.74	396	0.02739	24.74	366	0.03614	24.74	439	0.0506	24.74	365	0.01984	24.74	446	0.03569
24.755	438	0.03071	24.755	382	0.02643	24.755	414	0.04088	24.755	435	0.05014	24.755	356	0.01935	24.755	418	0.03345
24.77	415	0.0291	24.77	401	0.02774	24.77	382	0.03772	24.77	429	0.04945	24.77	371	0.02016	24.77	401	0.03209
24.785	433	0.03036	24.785	399	0.0276	24.785	384	0.03792	24.785	435	0.05014	24.785	372	0.02022	24.785	420	0.03361
24.8	430	0.03015	24.8	402	0.02781	24.8	412	0.04068	24.8	435	0.05014	24.8	389	0.02114	24.8	415	0.03321
24.815	434	0.03043	24.815	365	0.02525	24.815	401	0.0396	24.815	429	0.04945	24.815	364	0.01978	24.815	418	0.03345
24.83	438	0.03071	24.83	392	0.02712	24.83	401	0.0396	24.83	469	0.05406	24.83	362	0.01967	24.83	400	0.03201
24.845	440	0.03085	24.845	424	0.02933	24.845	390	0.03851	24.845	444	0.05118	24.845	377	0.02049	24.845	411	0.03289
24.86	446	0.03127	24.86	417	0.02885	24.86	375	0.03703	24.86	488	0.05625	24.86	395	0.02147	24.86	398	0.03185
24.875	452	0.03169	24.875	421	0.02912	24.875	401	0.0396	24.875	450	0.05187	24.875	357	0.0194	24.875	385	0.03081
24.89	450	0.03155	24.89	389	0.02691	24.89	354	0.03496	24.89	441	0.05083	24.89	395	0.02147	24.89	420	0.03361
24.905	421	0.02952	24.905	401	0.02774	24.905	401	0.0396	24.905	423	0.04876	24.905	379	0.0206	24.905	403	0.03225
24.92	443	0.03106	24.92	407	0.02815	24.92	367	0.03624	24.92	422	0.04864	24.92	405	0.02201	24.92	403	0.03225
24.935	433	0.03036	24.935	392	0.02712	24.935	403	0.03979	24.935	445	0.05129	24.935	389	0.02114	24.935	399	0.03193
24.95	452	0.03169	24.95	426	0.02947	24.95	392	0.03871	24.95	419	0.04829	24.95	395	0.02147	24.95	421	0.03369
24.965	424	0.02973	24.965	414	0.02864	24.965	396	0.0391	24.965	419	0.04829	24.965	370	0.02011	24.965	448	0.03585
24.98	426	0.02987	24.98	414	0.02864	24.98	407	0.04019	24.98	454	0.05233	24.98	379	0.0206	24.98	438	0.03505
24.995	462	0.03239	24.995	406	0.02809	24.995	396	0.0391	24.995	443	0.05106	24.995	384	0.02087	24.995	426	0.03409
25.01	427	0.02994	25.01	425	0.0294	25.01	411	0.04058	25.01	454	0.05233	25.01	395	0.02147	25.01	435	0.03481
25.025	447	0.03134	25.025	455	0.03147	25.025	367	0.03624	25.025	440	0.05071	25.025	395	0.02147	25.025	431	0.03449
25.04	449	0.03148	25.04	417	0.02885	25.04	369	0.03644	25.04	437	0.05037	25.04	398	0.02163	25.04	413	0.03305
25.055	453	0.03176	25.055	384	0.02656	25.055	384	0.03792	25.055	465	0.0536	25.055	361	0.01962	25.055	438	0.03505
25.07	409	0.02868	25.07	421	0.02912	25.07	375	0.03703	25.07	471	0.05429	25.07	360	0.01957	25.07	455	0.03641
25.085	405	0.0284	25.085	402	0.02781	25.085	420	0.04147	25.085	471	0.05429	25.085	396	0.02152	25.085	406	0.03249
25.1	439	0.03078	25.1	408	0.02822	25.1	420	0.04147	25.1	438	0.05048	25.1	397	0.02158	25.1	421	0.03369
25.115	397	0.02783	25.115	420	0.02905	25.115	396	0.0391	25.115	413	0.0476	25.115	394	0.02141	25.115	415	0.03321
25.13	424	0.02973	25.13	403	0.02788	25.13	392	0.03871	25.13	413	0.0476	25.13	379	0.0206	25.13	421	0.03369
25.145	406	0.02847	25.145	405	0.02802	25.145	404	0.03989	25.145	410	0.04726	25.145	418	0.02272	25.145	385	0.03081
25.16	433	0.03036	25.16	415	0.02871	25.16	384	0.03792	25.16	424	0.04887	25.16	366	0.01989	25.16	417	0.03337
25.175	442	0.03099	25.175	410	0.02836	25.175	391	0.03861	25.175	440	0.05071	25.175	361	0.01962	25.175	401	0.03209
25.19	423	0.02966	25.19	437	0.03023	25.19	395	0.039	25.19	429	0.04945	25.19	367	0.01995	25.19	418	0.03345
25.205	417	0.02924	25.205	395	0.02732	25.205	377	0.03723	25.205	420	0.04841	25.205	389	0.02114	25.205	406	0.03249
25.22	405	0.0284	25.22	427	0.02954	25.22	416	0.04108	25.22	447	0.05152	25.22	373	0.02027	25.22	416	0.03329
25.235	450	0.03155	25.235	423	0.02926	25.235	378	0.03733	25.235	436	0.05025	25.235	387	0.02103	25.235	402	0.03217
25.25	422	0.02959	25.25	423	0.02926	25.25	390	0.03851	25.25	425	0.04899	25.25	389	0.02114	25.25	405	0.03241
25.265	436	0.03057	25.265	459	0.03175	25.265	394	0.03891	25.265	442	0.05095	25.265	376	0.02044	25.265	413	0.03305
25.28	424	0.02973	25.28	418	0.02892	25.28	403	0.03979	25.28	476	0.05486	25.28	374	0.02033	25.28	411	0.03289
25.295	411	0.02882	25.295	389	0.02691	25.295	436	0.04305	25.295	455	0.05244	25.295	382	0.02076	25.295	400	0.03201
25.31	424	0.02973	25.31	398	0.02753	25.31	376	0.03713	25.31	439	0.0506	25.31	359	0.01951	25.31	422	0.03377
25.325	413	0.02896	25.325	423	0.02926	25.325	372	0.03673	25.325	443	0.05106	25.325	395	0.02147	25.325	413	0.03305
25.34	389	0.02727	25.34	401	0.02774	25.34	404	0.03989	25.34	440	0.05071	25.34	413	0.02245	25.34	412	0.03297
25.355	480	0.03365	25.355	390	0.02698	25.355	395	0.039	25.355	442	0.05095	25.355	388	0.02109	25.355	408	0.03265
25.37	416	0.02917	25.37	414	0.02864	25.37	401	0.0396	25.37	440	0.05071	25.37	360	0.01957	25.37	438	0.03505
25.385	426	0.02987	25.385	430	0.02975	25.385	408	0.04029	25.385	438	0.05048	25.385	384	0.02087	25.385	394	0.03153
25.4	448	0.03141	25.4	429	0.02968	25.4	412	0.04068	25.4	447	0.05152	25.4	407	0.02212	25.4	418	0.03345
25.415	446	0.03127	25.415	451	0.0312	25.415	409	0.04039	25.415	424	0.04887	25.415	368	0.02	25.415	406	0.03249
25.43	458	0.03211	25.43	405	0.02802	25.43	420	0.04147	25.43	421	0.04852	25.43	376	0.02044	25.43	412	0.03297
25.445	476	0.03337	25.445	402	0.02781	25.445	422	0.04167	25.445	441	0.05083	25.445	379	0.0206	25.445	408	0.03265
25.46	437	0.03064	25.46	424	0.02933	25.46	412	0.04068	25.46	452	0.0521	25.46	360	0.01957	25.46	425	0.03401
25.475	424	0.02973	25.475	419	0.02898	25.475	369	0.03644	25.475	434	0.05002	25.475	365	0.01984	25.475	446	0.03569
25.49	462	0.03239	25.49	445	0.03078	25.49	376	0.03713	25.49	481	0.05544	25.49	351	0.01908	25.49	433	0.03465
25.505	438	0.03071	25.505	427	0.02954	25.505	416	0.04108	25.505	485	0.0559	25.505	373	0.02027	25.505	427	0.03417
25.52	415	0.0291	25.52	406	0.02809	25.52	427	0.04216	25.52	458	0.05279	25.52	393	0.02136	25.52	409	0.03273
25.535	415	0.0291	25.535	410	0.02836	25.535	408	0.04029	25.535	456	0.05256	25.535	379	0.0206	25.535	431	0.03449
25.55	438	0.03071	25.55	411	0.02843	25.55	414	0.04088	25.55	459	0.0529	25.55	387	0.02103	25.55	434	0.03473
25.565	438	0.03071	25.565	406	0.02809	25.565	415	0.04098	25.565	485	0.0559	25.565	364	0.01978	25.565	426	0.03409
25.58	435	0.0305	25.58	411	0.02843	25.58	454	0.04483	25.58	466	0.05371	25.58	379	0.0206	25.58	429	0.03433
25.595	443	0.03106	25.595	435	0.03009	25.595	421	0.04157	25.595	448	0.05164	25.595	390	0.0212	25.595	417	0.03337
25.61	431	0.03022	25.61	438	0.0303	25.61	426	0.04207	25.61	470	0.05417	25.61	384	0.02087	25.61	478	0.03826
25.625	442	0.03099	25.625	400	0.02767	25.625	394	0.03891	25.625	474	0.05463	25.625	385	0.02093	25.625	447	0.03577
25.64	429	0.03008	25.64	416	0.02878	25.64	421	0.04157	25.64	487	0.05613	25.64	381	0.02071	25.64	439	0.03513
25.655	454	0.03183	25.655	464	0.0321	25.655	386	0.03812	25.655	448	0.05164	25.655	418	0.02272	25.655	431	0.03449
25.67	436	0.03057	25.67	434	0.03002	25.67	423	0.04177	25.67	484	0.05579	25.67	415	0.02256	25.67	434	0.03473
25.685	450	0.03155	25.685	418	0.02892	25.685	390	0.03851	25.685	452	0.0521	25.685	401	0.02179	25.685	431	0.03449
25.7	452	0.03169	25.7	428	0.02961	25.7	420	0.04147	25.7	429	0.04945	25.7	390	0.0212	25.7	434	0.03473
25.715	445	0.0312	25.715	457	0.03161	25.715	427	0.04216	25.715	477	0.05498	25.715	386	0.02098	25.715	428	0.03425
25.73	424	0.02973	25.73	440	0.03044	25.73	413	0.04078	25.73	469	0.05406	25.73	377	0.02049	25.73	441	0.03529
25.745	399	0.02797	25.745	429	0.02968	25.745	414	0.04088	25.745	474	0.05463	25.745	370	0.02011	25.745	431	0.03449
25.76	459	0.03218	25.76	437	0.03023	25.76	420	0.04147	25.76	469	0.05406	25.76	406	0.02207	25.76	447	0.03577
25.775	479	0.03358	25.775	437	0.03023	25.775	407	0.04019	25.775	488	0.05625	25.775	412	0.02239	25.775	442	0.03537
25.79	444	0.03113	25.79	427	0.02954	25.79	431	0.04256	25.79	483	0.05567	25.79	372	0.02022	25.79	436	0.03489
25.805	487	0.03414	25.805	416	0.02878	25.805	436	0.04305	25.805	431	0.04968	25.805	384	0.02087	25.805	414	0.03313
25.82	509	0.03569	25.82	434	0.03002	25.82	433	0.04276	25.82	475	0.05475	25.82	391	0.02125	25.82	445	0.03561
25.835	457	0.03204	25.835	424	0.02933	25.835	418	0.04128	25.835	449	0.05175	25.835	399	0.02169	25.835	429	0.03433
25.85	446	0.03127	25.85	454	0.03141	25.85	412	0.04068	25.85	493	0.05682	25.85	400	0.02174	25.85	454	0.03633
25.865	479	0.03358	25.865	433	0.02995	25.865	437	0.04315	25.865	488	0.05625	25.865	406	0.02207	25.865	461	0.03689
25.88	504	0.03534	25.88	452	0.03127	25.88	439	0.04335	25.88	478	0.05509	25.88	392	0.02131	25.88	458	0.03665
25.895	471	0.03302	25.895	449	0.03106	25.895	403	0.03979	25.895	476	0.05486	25.895	389	0.02114	25.895	461	0.03689
25.91	484	0.03393	25.91	445	0.03078	25.91	379	0.03742	25.91	454	0.05233	25.91	388	0.02109	25.91	446	0.03569
25.925	496	0.03478	25.925	448	0.03099	25.925	417	0.04118	25.925	488	0.05625	25.925	356	0.01935	25.925	462	0.03697
25.94	541	0.03793	25.94	460	0.03182	25.94	400	0.0395	25.94	488	0.05625	25.94	364	0.01978	25.94	479	0.03834
25.955	495	0.03471	25.955	432	0.02988	25.955	437	0.04315	25.955	456	0.05256	25.955	413	0.02245	25.955	500	0.04002
25.97	478	0.03351	25.97	447	0.03092	25.97	434	0.04286	25.97	494	0.05694	25.97	395	0.02147	25.97	479	0.03834
25.985	469	0.03288	25.985	468	0.03237	25.985	395	0.039	25.985	508	0.05855	25.985	429	0.02332	25.985	440	0.03521
26	477	0.03344	26	457	0.03161	26	446	0.04404	26	493	0.05682	26	417	0.02266	26	444	0.03553
26.015	433	0.03036	26.015	478	0.03307	26.015	450	0.04444	26.015	486	0.05602	26.015	396	0.02152	26.015	459	0.03673
26.03	449	0.03148	26.03	465	0.03217	26.03	429	0.04236	26.03	491	0.05659	26.03	369	0.02006	26.03	437	0.03497
26.045	476	0.03337	26.045	495	0.03424	26.045	426	0.04207	26.045	442	0.05095	26.045	418	0.02272	26.045	443	0.03545
26.06	486	0.03407	26.06	484	0.03348	26.06	468	0.04621	26.06	466	0.05371	26.06	387	0.02103	26.06	480	0.03842
26.075	462	0.03239	26.075	478	0.03307	26.075	464	0.04582	26.075	493	0.05682	26.075	366	0.01989	26.075	470	0.03762
26.09	453	0.03176	26.09	460	0.03182	26.09	406	0.04009	26.09	507	0.05844	26.09	407	0.02212	26.09	468	0.03745
26.105	488	0.03421	26.105	495	0.03424	26.105	436	0.04305	26.105	491	0.05659	26.105	407	0.02212	26.105	455	0.03641
26.12	475	0.0333	26.12	465	0.03217	26.12	431	0.04256	26.12	494	0.05694	26.12	404	0.02196	26.12	436	0.03489
26.135	468	0.03281	26.135	463	0.03203	26.135	436	0.04305	26.135	486	0.05602	26.135	410	0.02228	26.135	451	0.03609
26.15	457	0.03204	26.15	461	0.03189	26.15	434	0.04286	26.15	498	0.0574	26.15	440	0.02391	26.15	467	0.03737
26.165	479	0.03358	26.165	480	0.0332	26.165	395	0.039	26.165	483	0.05567	26.165	384	0.02087	26.165	465	0.03721
26.18	488	0.03421	26.18	424	0.02933	26.18	413	0.04078	26.18	455	0.05244	26.18	383	0.02082	26.18	451	0.03609
26.195	482	0.03379	26.195	462	0.03196	26.195	422	0.04167	26.195	475	0.05475	26.195	381	0.02071	26.195	482	0.03858
26.21	470	0.03295	26.21	460	0.03182	26.21	402	0.0397	26.21	487	0.05613	26.21	406	0.02207	26.21	415	0.03321
26.225	535	0.03751	26.225	496	0.03431	26.225	434	0.04286	26.225	489	0.05636	26.225	434	0.02359	26.225	470	0.03762
26.24	492	0.03449	26.24	479	0.03314	26.24	412	0.04068	26.24	505	0.05821	26.24	399	0.02169	26.24	471	0.0377
26.255	459	0.03218	26.255	466	0.03224	26.255	424	0.04187	26.255	499	0.05751	26.255	405	0.02201	26.255	467	0.03737
26.27	484	0.03393	26.27	462	0.03196	26.27	416	0.04108	26.27	486	0.05602	26.27	400	0.02174	26.27	498	0.03986
26.285	492	0.03449	26.285	497	0.03438	26.285	443	0.04374	26.285	493	0.05682	26.285	408	0.02218	26.285	497	0.03978
26.3	507	0.03555	26.3	457	0.03161	26.3	474	0.04681	26.3	505	0.05821	26.3	384	0.02087	26.3	500	0.04002
26.315	541	0.03793	26.315	459	0.03175	26.315	421	0.04157	26.315	509	0.05867	26.315	408	0.02218	26.315	481	0.0385
26.33	510	0.03576	26.33	469	0.03244	26.33	410	0.04049	26.33	480	0.05533	26.33	426	0.02315	26.33	485	0.03882
26.345	499	0.03499	26.345	449	0.03106	26.345	431	0.04256	26.345	512	0.05901	26.345	427	0.02321	26.345	480	0.03842
26.36	516	0.03618	26.36	461	0.03189	26.36	463	0.04572	26.36	496	0.05717	26.36	455	0.02473	26.36	463	0.03705
26.375	491	0.03442	26.375	468	0.03237	26.375	463	0.04572	26.375	482	0.05556	26.375	410	0.02228	26.375	483	0.03866
26.39	501	0.03513	26.39	476	0.03293	26.39	429	0.04236	26.39	486	0.05602	26.39	421	0.02288	26.39	487	0.03898
26.405	498	0.03492	26.405	499	0.03452	26.405	444	0.04384	26.405	496	0.05717	26.405	429	0.02332	26.405	476	0.0381
26.42	473	0.03316	26.42	499	0.03452	26.42	465	0.04592	26.42	485	0.0559	26.42	455	0.02473	26.42	485	0.03882
26.435	493	0.03456	26.435	542	0.03749	26.435	488	0.04819	26.435	483	0.05567	26.435	449	0.0244	26.435	491	0.0393
26.45	525	0.03681	26.45	536	0.03708	26.45	476	0.047	26.45	486	0.05602	26.45	440	0.02391	26.45	503	0.04026
26.465	534	0.03744	26.465	534	0.03694	26.465	461	0.04552	26.465	478	0.05509	26.465	445	0.02419	26.465	514	0.04114
26.48	535	0.03751	26.48	509	0.03521	26.48	484	0.04779	26.48	509	0.05867	26.48	400	0.02174	26.48	506	0.0405
26.495	531	0.03723	26.495	569	0.03936	26.495	477	0.0471	26.495	483	0.05567	26.495	411	0.02234	26.495	490	0.03922
26.51	533	0.03737	26.51	551	0.03812	26.51	493	0.04868	26.51	520	0.05994	26.51	439	0.02386	26.51	545	0.04362
26.525	511	0.03583	26.525	540	0.03735	26.525	482	0.0476	26.525	528	0.06086	26.525	409	0.02223	26.525	567	0.04538
26.54	536	0.03758	26.54	509	0.03521	26.54	459	0.04532	26.54	507	0.05844	26.54	424	0.02304	26.54	505	0.04042
26.555	546	0.03828	26.555	520	0.03597	26.555	474	0.04681	26.555	532	0.06132	26.555	432	0.02348	26.555	527	0.04218
26.57	549	0.03849	26.57	533	0.03687	26.57	495	0.04888	26.57	553	0.06374	26.57	394	0.02141	26.57	543	0.04346
26.585	520	0.03646	26.585	548	0.03791	26.585	521	0.05145	26.585	536	0.06178	26.585	413	0.02245	26.585	569	0.04554
26.6	540	0.03786	26.6	557	0.03853	26.6	528	0.05214	26.6	540	0.06224	26.6	434	0.02359	26.6	552	0.04418
26.615	559	0.03919	26.615	572	0.03957	26.615	531	0.05243	26.615	555	0.06397	26.615	444	0.02413	26.615	521	0.0417
26.63	545	0.03821	26.63	616	0.04261	26.63	553	0.05461	26.63	545	0.06282	26.63	445	0.02419	26.63	556	0.0445
26.645	541	0.03793	26.645	591	0.04088	26.645	519	0.05125	26.645	552	0.06362	26.645	453	0.02462	26.645	573	0.04586
26.66	576	0.04038	26.66	582	0.04026	26.66	510	0.05036	26.66	503	0.05798	26.66	454	0.02468	26.66	572	0.04578
26.675	571	0.04003	26.675	592	0.04095	26.675	495	0.04888	26.675	574	0.06616	26.675	475	0.02582	26.675	567	0.04538
26.69	586	0.04109	26.69	575	0.03978	26.69	506	0.04997	26.69	555	0.06397	26.69	460	0.025	26.69	603	0.04826
26.705	621	0.04354	26.705	592	0.04095	26.705	564	0.05569	26.705	542	0.06247	26.705	471	0.0256	26.705	633	0.05066
26.72	621	0.04354	26.72	663	0.04586	26.72	546	0.05392	26.72	566	0.06524	26.72	461	0.02506	26.72	632	0.05058
26.735	567	0.03975	26.735	637	0.04406	26.735	575	0.05678	26.735	600	0.06916	26.735	482	0.0262	26.735	643	0.05146
26.75	585	0.04102	26.75	634	0.04386	26.75	518	0.05115	26.75	574	0.06616	26.75	491	0.02669	26.75	678	0.05426
26.765	618	0.04333	26.765	599	0.04144	26.765	557	0.055	26.765	589	0.06789	26.765	502	0.02728	26.765	670	0.05362
26.78	636	0.04459	26.78	627	0.04337	26.78	571	0.05638	26.78	579	0.06674	26.78	466	0.02533	26.78	694	0.05554
26.795	649	0.0455	26.795	719	0.04974	26.795	574	0.05668	26.795	600	0.06916	26.795	496	0.02696	26.795	667	0.05338
26.81	661	0.04634	26.81	651	0.04503	26.81	566	0.05589	26.81	635	0.07319	26.81	494	0.02685	26.81	692	0.05538
26.825	676	0.0474	26.825	659	0.04559	26.825	557	0.055	26.825	597	0.06881	26.825	539	0.0293	26.825	689	0.05514
26.84	706	0.0495	26.84	725	0.05015	26.84	612	0.06043	26.84	624	0.07192	26.84	537	0.02919	26.84	722	0.05778
26.855	712	0.04992	26.855	689	0.04766	26.855	640	0.0632	26.855	669	0.07711	26.855	558	0.03033	26.855	728	0.05826
26.87	694	0.04866	26.87	710	0.04911	26.87	634	0.0626	26.87	647	0.07457	26.87	552	0.03	26.87	750	0.06002
26.885	689	0.04831	26.885	759	0.0525	26.885	651	0.06428	26.885	655	0.0755	26.885	529	0.02875	26.885	752	0.06018
26.9	695	0.04873	26.9	743	0.0514	26.9	677	0.06685	26.9	674	0.07769	26.9	531	0.02886	26.9	839	0.06715
26.915	814	0.05707	26.915	768	0.05313	26.915	684	0.06754	26.915	697	0.08034	26.915	516	0.02805	26.915	799	0.06395
26.93	806	0.05651	26.93	814	0.05631	26.93	691	0.06823	26.93	739	0.08518	26.93	567	0.03082	26.93	782	0.06259
26.945	760	0.05328	26.945	853	0.05901	26.945	687	0.06784	26.945	666	0.07676	26.945	568	0.03087	26.945	818	0.06547
26.96	790	0.05539	26.96	912	0.06309	26.96	706	0.06971	26.96	684	0.07884	26.96	568	0.03087	26.96	836	0.06691
26.975	848	0.05945	26.975	927	0.06413	26.975	703	0.06942	26.975	733	0.08449	26.975	602	0.03272	26.975	913	0.07307
26.99	854	0.05988	26.99	961	0.06648	26.99	770	0.07603	26.99	767	0.0884	26.99	591	0.03212	26.99	979	0.07835
27.005	896	0.06282	27.005	944	0.0653	27.005	825	0.08147	27.005	845	0.0974	27.005	605	0.03288	27.005	966	0.07731
27.02	952	0.06675	27.02	1046	0.07236	27.02	843	0.08324	27.02	825	0.09509	27.02	648	0.03522	27.02	996	0.07971
27.035	964	0.06759	27.035	1112	0.07692	27.035	827	0.08166	27.035	831	0.09578	27.035	622	0.03381	27.035	1030	0.08243
27.05	1027	0.072	27.05	1112	0.07692	27.05	900	0.08887	27.05	797	0.09186	27.05	650	0.03533	27.05	1086	0.08691
27.065	1057	0.07411	27.065	1160	0.08024	27.065	915	0.09035	27.065	845	0.0974	27.065	644	0.035	27.065	1174	0.09396
27.08	1103	0.07733	27.08	1297	0.08972	27.08	943	0.09312	27.08	940	0.10834	27.08	692	0.03761	27.08	1177	0.0942
27.095	1128	0.07909	27.095	1363	0.09429	27.095	989	0.09766	27.095	908	0.10466	27.095	720	0.03913	27.095	1271	0.10172
27.11	1261	0.08841	27.11	1439	0.09954	27.11	1029	0.10161	27.11	1012	0.11664	27.11	752	0.04087	27.11	1285	0.10284
27.125	1265	0.08869	27.125	1477	0.10217	27.125	1097	0.10832	27.125	993	0.11445	27.125	761	0.04136	27.125	1338	0.10708
27.14	1342	0.09409	27.14	1552	0.10736	27.14	1147	0.11326	27.14	1065	0.12275	27.14	813	0.04419	27.14	1424	0.11397
27.155	1437	0.10075	27.155	1592	0.11013	27.155	1243	0.12274	27.155	1133	0.13059	27.155	870	0.04729	27.155	1501	0.12013
27.17	1557	0.10916	27.17	1825	0.12625	27.17	1247	0.12314	27.17	1185	0.13658	27.17	883	0.04799	27.17	1589	0.12717
27.185	1662	0.11653	27.185	1837	0.12708	27.185	1311	0.12946	27.185	1197	0.13797	27.185	926	0.05033	27.185	1714	0.13717
27.2	1775	0.12445	27.2	2016	0.13946	27.2	1447	0.14289	27.2	1222	0.14085	27.2	986	0.05359	27.2	1797	0.14382
27.215	1880	0.13181	27.215	2155	0.14907	27.215	1489	0.14703	27.215	1351	0.15572	27.215	993	0.05397	27.215	1908	0.1527
27.23	2053	0.14394	27.23	2359	0.16318	27.23	1591	0.1571	27.23	1449	0.16701	27.23	1132	0.06153	27.23	2136	0.17095
27.245	2292	0.1607	27.245	2438	0.16865	27.245	1720	0.16984	27.245	1495	0.17231	27.245	1170	0.06359	27.245	2184	0.17479
27.26	2369	0.16609	27.26	2628	0.18179	27.26	1824	0.18011	27.26	1604	0.18488	27.26	1210	0.06576	27.26	2300	0.18407
27.275	2571	0.18026	27.275	2781	0.19238	27.275	2008	0.19828	27.275	1760	0.20286	27.275	1379	0.07495	27.275	2622	0.20984
27.29	2913	0.20423	27.29	3011	0.20829	27.29	2158	0.21309	27.29	1831	0.21104	27.29	1473	0.08006	27.29	2721	0.21777
27.305	3085	0.21629	27.305	3278	0.22676	27.305	2248	0.22198	27.305	2001	0.23064	27.305	1648	0.08957	27.305	2928	0.23433
27.32	3436	0.2409	27.32	3590	0.24834	27.32	2437	0.24064	27.32	2130	0.2455	27.32	1752	0.09522	27.32	3213	0.25714
27.335	3672	0.25745	27.335	3797	0.26266	27.335	2606	0.25733	27.335	2287	0.2636	27.335	1965	0.1068	27.335	3475	0.27811
27.35	4035	0.2829	27.35	4148	0.28694	27.35	2802	0.27669	27.35	2503	0.2885	27.35	2276	0.1237	27.35	3712	0.29708
27.365	4476	0.31382	27.365	4406	0.30479	27.365	3090	0.30512	27.365	2670	0.30775	27.365	2505	0.13615	27.365	3968	0.31757
27.38	4832	0.33878	27.38	4755	0.32893	27.38	3289	0.32478	27.38	2857	0.3293	27.38	2819	0.15321	27.38	4222	0.3379
27.395	5305	0.37194	27.395	5092	0.35224	27.395	3477	0.34334	27.395	3071	0.35396	27.395	3170	0.17229	27.395	4614	0.36927
27.41	5700	0.39964	27.41	5447	0.3768	27.41	3781	0.37336	27.41	3318	0.38243	27.41	3592	0.19523	27.41	4980	0.39856
27.425	6120	0.42908	27.425	5857	0.40516	27.425	4053	0.40022	27.425	3564	0.41079	27.425	4065	0.22094	27.425	5279	0.42249
27.44	6663	0.46715	27.44	6196	0.42861	27.44	4292	0.42382	27.44	3752	0.43246	27.44	4773	0.25942	27.44	5672	0.45394
27.455	7101	0.49786	27.455	6568	0.45434	27.455	4621	0.4563	27.455	3963	0.45678	27.455	5451	0.29627	27.455	5981	0.47867
27.47	7536	0.52836	27.47	7043	0.4872	27.47	4873	0.48119	27.47	4225	0.48698	27.47	6210	0.33752	27.47	6461	0.51709
27.485	7979	0.55942	27.485	7545	0.52193	27.485	5172	0.51071	27.485	4548	0.5242	27.485	7264	0.3948	27.485	6698	0.53605
27.5	8370	0.58683	27.5	8059	0.55748	27.5	5568	0.54982	27.5	4762	0.54887	27.5	8485	0.46117	27.5	6929	0.55454
27.515	8662	0.60731	27.515	8596	0.59463	27.515	5941	0.58665	27.515	5100	0.58783	27.515	9794	0.53231	27.515	7454	0.59656
27.53	8536	0.59847	27.53	8620	0.59629	27.53	6102	0.60255	27.53	5243	0.60431	27.53	10859	0.5902	27.53	7543	0.60368
27.545	8253	0.57863	27.545	8362	0.57844	27.545	5971	0.58961	27.545	5242	0.6042	27.545	11054	0.60079	27.545	7257	0.58079
27.56	7763	0.54428	27.56	7782	0.53832	27.56	5556	0.54863	27.56	4826	0.55625	27.56	10216	0.55525	27.56	6791	0.5435
27.575	6861	0.48103	27.575	6890	0.47662	27.575	4739	0.46796	27.575	4367	0.50334	27.575	8539	0.4641	27.575	6019	0.48171
27.59	6044	0.42375	27.59	6008	0.41561	27.59	3959	0.39094	27.59	3505	0.40399	27.59	6450	0.35056	27.59	5111	0.40904
27.605	5057	0.35455	27.605	4949	0.34235	27.605	3196	0.31559	27.605	2896	0.33379	27.605	4602	0.25012	27.605	4264	0.34126
27.62	4395	0.30814	27.62	4174	0.28874	27.62	2744	0.27096	27.62	2492	0.28723	27.62	3363	0.18278	27.62	3657	0.29268
27.635	3805	0.26677	27.635	3523	0.24371	27.635	2446	0.24153	27.635	2137	0.24631	27.635	2687	0.14604	27.635	3183	0.25474
27.65	3308	0.23193	27.65	3092	0.21389	27.65	2289	0.22603	27.65	1987	0.22902	27.65	2258	0.12272	27.65	2857	0.22865
27.665	3042	0.21328	27.665	2729	0.18878	27.665	1986	0.19611	27.665	1895	0.21842	27.665	1887	0.10256	27.665	2583	0.20672
27.68	2758	0.19337	27.68	2537	0.1755	27.68	1854	0.18307	27.68	1742	0.20078	27.68	1665	0.09049	27.68	2370	0.18968
27.695	2515	0.17633	27.695	2328	0.16104	27.695	1758	0.1736	27.695	1625	0.1873	27.695	1525	0.08288	27.695	2241	0.17935
27.71	2382	0.16701	27.71	2094	0.14485	27.71	1653	0.16323	27.71	1443	0.16632	27.71	1440	0.07827	27.71	2035	0.16287
27.725	2172	0.15228	27.725	1996	0.13807	27.725	1508	0.14891	27.725	1396	0.1609	27.725	1353	0.07354	27.725	1893	0.1515
27.74	2074	0.14541	27.74	1811	0.12528	27.74	1339	0.13222	27.74	1309	0.15088	27.74	1242	0.0675	27.74	1770	0.14166
27.755	1812	0.12704	27.755	1742	0.1205	27.755	1332	0.13153	27.755	1212	0.1397	27.755	1116	0.06066	27.755	1697	0.13581
27.77	1772	0.12424	27.77	1595	0.11033	27.77	1289	0.12728	27.77	1165	0.13428	27.77	1020	0.05544	27.77	1566	0.12533
27.785	1585	0.11113	27.785	1472	0.10183	27.785	1175	0.11603	27.785	1086	0.12517	27.785	982	0.05337	27.785	1475	0.11805
27.8	1429	0.10019	27.8	1405	0.09719	27.8	1108	0.10941	27.8	1057	0.12183	27.8	959	0.05212	27.8	1397	0.1118
27.815	1381	0.09682	27.815	1269	0.08778	27.815	1021	0.10082	27.815	1043	0.12022	27.815	938	0.05098	27.815	1367	0.1094
27.83	1361	0.09542	27.83	1258	0.08702	27.83	1039	0.1026	27.83	976	0.11249	27.83	897	0.04875	27.83	1249	0.09996
27.845	1278	0.0896	27.845	1267	0.08765	27.845	971	0.09588	27.845	938	0.10811	27.845	844	0.04587	27.845	1201	0.09612
27.86	1185	0.08308	27.86	1153	0.07976	27.86	958	0.0946	27.86	909	0.10477	27.86	807	0.04386	27.86	1122	0.0898
27.875	1120	0.07852	27.875	1097	0.07589	27.875	964	0.09519	27.875	875	0.10085	27.875	751	0.04082	27.875	1072	0.08579
27.89	1053	0.07383	27.89	1005	0.06952	27.89	862	0.08512	27.89	879	0.10131	27.89	708	0.03848	27.89	1071	0.08571
27.905	1013	0.07102	27.905	999	0.06911	27.905	831	0.08206	27.905	834	0.09613	27.905	732	0.03978	27.905	1032	0.08259
27.92	1007	0.0706	27.92	953	0.06592	27.92	808	0.07979	27.92	789	0.09094	27.92	679	0.0369	27.92	919	0.07355
27.935	1011	0.07088	27.935	942	0.06516	27.935	777	0.07673	27.935	797	0.09186	27.935	671	0.03647	27.935	898	0.07187
27.95	964	0.06759	27.95	901	0.06233	27.95	778	0.07682	27.95	772	0.08898	27.95	668	0.03631	27.95	927	0.07419
27.965	898	0.06296	27.965	844	0.05838	27.965	674	0.06655	27.965	717	0.08264	27.965	650	0.03533	27.965	865	0.06923
27.98	857	0.06009	27.98	776	0.05368	27.98	715	0.0706	27.98	687	0.07918	27.98	643	0.03495	27.98	842	0.06739
27.995	837	0.05868	27.995	850	0.0588	27.995	690	0.06813	27.995	696	0.08022	27.995	642	0.03489	27.995	831	0.06651
28.01	825	0.05784	28.01	818	0.05659	28.01	641	0.0633	28.01	651	0.07503	28.01	593	0.03223	28.01	766	0.0613
28.025	801	0.05616	28.025	764	0.05285	28.025	671	0.06626	28.025	689	0.07941	28.025	580	0.03152	28.025	777	0.06218
28.04	818	0.05735	28.04	707	0.04891	28.04	658	0.06497	28.04	648	0.07469	28.04	579	0.03147	28.04	735	0.05882
28.055	826	0.05791	28.055	714	0.04939	28.055	632	0.06241	28.055	660	0.07607	28.055	566	0.03076	28.055	718	0.05746
28.07	721	0.05055	28.07	741	0.05126	28.07	603	0.05954	28.07	671	0.07734	28.07	571	0.03103	28.07	710	0.05682
28.085	713	0.04999	28.085	703	0.04863	28.085	635	0.0627	28.085	661	0.07619	28.085	516	0.02805	28.085	722	0.05778
28.1	710	0.04978	28.1	698	0.04828	28.1	579	0.05717	28.1	623	0.07181	28.1	527	0.02864	28.1	675	0.05402
28.115	732	0.05132	28.115	672	0.04649	28.115	594	0.05866	28.115	633	0.07296	28.115	484	0.02631	28.115	696	0.0557
28.13	683	0.04789	28.13	627	0.04337	28.13	580	0.05727	28.13	615	0.07089	28.13	472	0.02565	28.13	672	0.05378
28.145	656	0.04599	28.145	637	0.04406	28.145	539	0.05322	28.145	587	0.06766	28.145	482	0.0262	28.145	638	0.05106
28.16	684	0.04796	28.16	587	0.04061	28.16	544	0.05372	28.16	569	0.06558	28.16	504	0.02739	28.16	645	0.05162
28.175	606	0.04249	28.175	551	0.03812	28.175	542	0.05352	28.175	572	0.06593	28.175	490	0.02663	28.175	572	0.04578
28.19	638	0.04473	28.19	564	0.03901	28.19	522	0.05155	28.19	543	0.06259	28.19	458	0.02489	28.19	580	0.04642
28.205	627	0.04396	28.205	599	0.04144	28.205	517	0.05105	28.205	539	0.06213	28.205	473	0.02571	28.205	609	0.04874
28.22	585	0.04102	28.22	625	0.04323	28.22	527	0.05204	28.22	571	0.06581	28.22	488	0.02652	28.22	597	0.04778
28.235	575	0.04031	28.235	604	0.04178	28.235	572	0.05648	28.235	579	0.06674	28.235	466	0.02533	28.235	581	0.0465
28.25	571	0.04003	28.25	572	0.03957	28.25	474	0.04681	28.25	575	0.06627	28.25	469	0.02549	28.25	571	0.0457
28.265	618	0.04333	28.265	586	0.04054	28.265	505	0.04987	28.265	557	0.0642	28.265	467	0.02538	28.265	569	0.04554
28.28	594	0.04165	28.28	547	0.03784	28.28	532	0.05253	28.28	529	0.06097	28.28	483	0.02625	28.28	549	0.04394
28.295	624	0.04375	28.295	577	0.03991	28.295	512	0.05056	28.295	535	0.06166	28.295	436	0.0237	28.295	562	0.04498
28.31	587	0.04116	28.31	545	0.0377	28.31	518	0.05115	28.31	577	0.06651	28.31	427	0.02321	28.31	569	0.04554
28.325	575	0.04031	28.325	568	0.03929	28.325	510	0.05036	28.325	534	0.06155	28.325	431	0.02343	28.325	549	0.04394
28.34	558	0.03912	28.34	521	0.03604	28.34	474	0.04681	28.34	524	0.0604	28.34	431	0.02343	28.34	546	0.0437
28.355	590	0.04137	28.355	534	0.03694	28.355	477	0.0471	28.355	534	0.06155	28.355	448	0.02435	28.355	540	0.04322
28.37	572	0.0401	28.37	511	0.03535	28.37	484	0.04779	28.37	536	0.06178	28.37	435	0.02364	28.37	532	0.04258
28.385	543	0.03807	28.385	544	0.03763	28.385	498	0.04918	28.385	535	0.06166	28.385	427	0.02321	28.385	544	0.04354
28.4	560	0.03926	28.4	550	0.03805	28.4	494	0.04878	28.4	542	0.06247	28.4	423	0.02299	28.4	521	0.0417
28.415	520	0.03646	28.415	535	0.03701	28.415	534	0.05273	28.415	509	0.05867	28.415	436	0.0237	28.415	517	0.04138
28.43	552	0.0387	28.43	517	0.03576	28.43	486	0.04799	28.43	491	0.05659	28.43	447	0.02429	28.43	521	0.0417
28.445	611	0.04284	28.445	527	0.03646	28.445	493	0.04868	28.445	542	0.06247	28.445	425	0.0231	28.445	497	0.03978
28.46	592	0.04151	28.46	541	0.03742	28.46	496	0.04898	28.46	503	0.05798	28.46	420	0.02283	28.46	522	0.04178
28.475	564	0.03954	28.475	505	0.03493	28.475	477	0.0471	28.475	512	0.05901	28.475	429	0.02332	28.475	526	0.0421
28.49	537	0.03765	28.49	515	0.03563	28.49	490	0.04839	28.49	496	0.05717	28.49	443	0.02408	28.49	495	0.03962
28.505	549	0.03849	28.505	491	0.03397	28.505	480	0.0474	28.505	510	0.05878	28.505	422	0.02294	28.505	516	0.0413
28.52	556	0.03898	28.52	510	0.03528	28.52	483	0.04769	28.52	545	0.06282	28.52	405	0.02201	28.52	539	0.04314
28.535	564	0.03954	28.535	488	0.03376	28.535	455	0.04493	28.535	492	0.05671	28.535	390	0.0212	28.535	542	0.04338
28.55	546	0.03828	28.55	495	0.03424	28.55	461	0.04552	28.55	505	0.05821	28.55	435	0.02364	28.55	504	0.04034
28.565	537	0.03765	28.565	546	0.03777	28.565	458	0.04523	28.565	534	0.06155	28.565	434	0.02359	28.565	515	0.04122
28.58	534	0.03744	28.58	530	0.03666	28.58	448	0.04424	28.58	525	0.06051	28.58	418	0.02272	28.58	493	0.03946
28.595	514	0.03604	28.595	533	0.03687	28.595	426	0.04207	28.595	506	0.05832	28.595	401	0.02179	28.595	506	0.0405
28.61	529	0.03709	28.61	497	0.03438	28.61	429	0.04236	28.61	513	0.05913	28.61	392	0.02131	28.61	543	0.04346
28.625	521	0.03653	28.625	497	0.03438	28.625	472	0.04661	28.625	512	0.05901	28.625	426	0.02315	28.625	515	0.04122
28.64	460	0.03225	28.64	506	0.035	28.64	468	0.04621	28.64	504	0.05809	28.64	442	0.02402	28.64	467	0.03737
28.655	499	0.03499	28.655	521	0.03604	28.655	450	0.04444	28.655	547	0.06305	28.655	407	0.02212	28.655	514	0.04114
28.67	499	0.03499	28.67	502	0.03473	28.67	465	0.04592	28.67	527	0.06074	28.67	409	0.02223	28.67	487	0.03898
28.685	501	0.03513	28.685	504	0.03486	28.685	459	0.04532	28.685	491	0.05659	28.685	405	0.02201	28.685	481	0.0385
28.7	521	0.03653	28.7	527	0.03646	28.7	427	0.04216	28.7	497	0.05728	28.7	435	0.02364	28.7	463	0.03705
28.715	518	0.03632	28.715	486	0.03362	28.715	456	0.04503	28.715	518	0.0597	28.715	439	0.02386	28.715	464	0.03713
28.73	534	0.03744	28.73	473	0.03272	28.73	458	0.04523	28.73	523	0.06028	28.73	400	0.02174	28.73	486	0.0389
28.745	488	0.03421	28.745	472	0.03265	28.745	471	0.04651	28.745	499	0.05751	28.745	439	0.02386	28.745	439	0.03513
28.76	499	0.03499	28.76	473	0.03272	28.76	455	0.04493	28.76	542	0.06247	28.76	443	0.02408	28.76	499	0.03994
28.775	513	0.03597	28.775	463	0.03203	28.775	464	0.04582	28.775	529	0.06097	28.775	411	0.02234	28.775	492	0.03938
28.79	487	0.03414	28.79	483	0.03341	28.79	431	0.04256	28.79	504	0.05809	28.79	414	0.0225	28.79	477	0.03818
28.805	468	0.03281	28.805	491	0.03397	28.805	456	0.04503	28.805	494	0.05694	28.805	409	0.02223	28.805	472	0.03778
28.82	513	0.03597	28.82	487	0.03369	28.82	474	0.04681	28.82	501	0.05775	28.82	414	0.0225	28.82	510	0.04082
28.835	507	0.03555	28.835	444	0.03071	28.835	454	0.04483	28.835	509	0.05867	28.835	397	0.02158	28.835	479	0.03834
28.85	522	0.0366	28.85	488	0.03376	28.85	444	0.04384	28.85	481	0.05544	28.85	378	0.02054	28.85	496	0.0397
28.865	441	0.03092	28.865	480	0.0332	28.865	418	0.04128	28.865	515	0.05936	28.865	439	0.02386	28.865	490	0.03922
28.88	495	0.03471	28.88	464	0.0321	28.88	423	0.04177	28.88	492	0.05671	28.88	396	0.02152	28.88	506	0.0405
28.895	469	0.03288	28.895	461	0.03189	28.895	438	0.04325	28.895	511	0.0589	28.895	389	0.02114	28.895	536	0.0429
28.91	494	0.03464	28.91	461	0.03189	28.91	447	0.04414	28.91	508	0.05855	28.91	422	0.02294	28.91	492	0.03938
28.925	510	0.03576	28.925	451	0.0312	28.925	437	0.04315	28.925	480	0.05533	28.925	429	0.02332	28.925	486	0.0389
28.94	466	0.03267	28.94	464	0.0321	28.94	433	0.04276	28.94	477	0.05498	28.94	413	0.02245	28.94	473	0.03786
28.955	461	0.03232	28.955	441	0.03051	28.955	422	0.04167	28.955	470	0.05417	28.955	395	0.02147	28.955	434	0.03473
28.97	459	0.03218	28.97	465	0.03217	28.97	425	0.04197	28.97	497	0.05728	28.97	409	0.02223	28.97	452	0.03617
28.985	472	0.03309	28.985	426	0.02947	28.985	424	0.04187	28.985	495	0.05705	28.985	381	0.02071	28.985	446	0.03569
29	439	0.03078	29	453	0.03134	29	409	0.04039	29	505	0.05821	29	398	0.02163	29	472	0.03778
29.015	516	0.03618	29.015	427	0.02954	29.015	465	0.04592	29.015	522	0.06017	29.015	426	0.02315	29.015	483	0.03866
29.03	521	0.03653	29.03	469	0.03244	29.03	465	0.04592	29.03	507	0.05844	29.03	402	0.02185	29.03	467	0.03737
29.045	466	0.03267	29.045	450	0.03113	29.045	470	0.04641	29.045	527	0.06074	29.045	418	0.02272	29.045	438	0.03505
29.06	464	0.03253	29.06	428	0.02961	29.06	442	0.04365	29.06	511	0.0589	29.06	406	0.02207	29.06	454	0.03633
29.075	481	0.03372	29.075	420	0.02905	29.075	417	0.04118	29.075	462	0.05325	29.075	376	0.02044	29.075	468	0.03745
29.09	508	0.03562	29.09	441	0.03051	29.09	434	0.04286	29.09	498	0.0574	29.09	375	0.02038	29.09	496	0.0397
29.105	490	0.03435	29.105	439	0.03037	29.105	419	0.04137	29.105	487	0.05613	29.105	389	0.02114	29.105	516	0.0413
29.12	414	0.02903	29.12	425	0.0294	29.12	430	0.04246	29.12	505	0.05821	29.12	387	0.02103	29.12	454	0.03633
29.135	469	0.03288	29.135	392	0.02712	29.135	421	0.04157	29.135	496	0.05717	29.135	391	0.02125	29.135	465	0.03721
29.15	459	0.03218	29.15	452	0.03127	29.15	441	0.04355	29.15	459	0.0529	29.15	400	0.02174	29.15	479	0.03834
29.165	464	0.03253	29.165	451	0.0312	29.165	446	0.04404	29.165	451	0.05198	29.165	384	0.02087	29.165	448	0.03585
29.18	486	0.03407	29.18	428	0.02961	29.18	458	0.04523	29.18	468	0.05394	29.18	395	0.02147	29.18	474	0.03794
29.195	478	0.03351	29.195	417	0.02885	29.195	436	0.04305	29.195	472	0.0544	29.195	395	0.02147	29.195	463	0.03705
29.21	477	0.03344	29.21	427	0.02954	29.21	411	0.04058	29.21	482	0.05556	29.21	361	0.01962	29.21	444	0.03553
29.225	474	0.03323	29.225	427	0.02954	29.225	409	0.04039	29.225	432	0.04979	29.225	368	0.02	29.225	444	0.03553
29.24	457	0.03204	29.24	438	0.0303	29.24	405	0.03999	29.24	469	0.05406	29.24	397	0.02158	29.24	445	0.03561
29.255	468	0.03281	29.255	452	0.03127	29.255	409	0.04039	29.255	483	0.05567	29.255	399	0.02169	29.255	445	0.03561
29.27	463	0.03246	29.27	462	0.03196	29.27	415	0.04098	29.27	487	0.05613	29.27	389	0.02114	29.27	417	0.03337
29.285	465	0.0326	29.285	436	0.03016	29.285	423	0.04177	29.285	456	0.05256	29.285	368	0.02	29.285	458	0.03665
29.3	455	0.0319	29.3	453	0.03134	29.3	425	0.04197	29.3	497	0.05728	29.3	411	0.02234	29.3	428	0.03425
29.315	470	0.03295	29.315	447	0.03092	29.315	410	0.04049	29.315	506	0.05832	29.315	388	0.02109	29.315	422	0.03377
29.33	477	0.03344	29.33	438	0.0303	29.33	408	0.04029	29.33	517	0.05959	29.33	398	0.02163	29.33	469	0.03754
29.345	434	0.03043	29.345	436	0.03016	29.345	420	0.04147	29.345	500	0.05763	29.345	371	0.02016	29.345	460	0.03681
29.36	442	0.03099	29.36	435	0.03009	29.36	407	0.04019	29.36	435	0.05014	29.36	365	0.01984	29.36	427	0.03417
29.375	450	0.03155	29.375	466	0.03224	29.375	423	0.04177	29.375	447	0.05152	29.375	357	0.0194	29.375	422	0.03377
29.39	461	0.03232	29.39	421	0.02912	29.39	411	0.04058	29.39	470	0.05417	29.39	340	0.01848	29.39	444	0.03553
29.405	458	0.03211	29.405	411	0.02843	29.405	400	0.0395	29.405	474	0.05463	29.405	376	0.02044	29.405	473	0.03786
29.42	450	0.03155	29.42	438	0.0303	29.42	395	0.039	29.42	498	0.0574	29.42	351	0.01908	29.42	432	0.03457
29.435	468	0.03281	29.435	446	0.03085	29.435	433	0.04276	29.435	498	0.0574	29.435	387	0.02103	29.435	436	0.03489
29.45	457	0.03204	29.45	414	0.02864	29.45	413	0.04078	29.45	502	0.05786	29.45	387	0.02103	29.45	449	0.03593
29.465	501	0.03513	29.465	451	0.0312	29.465	398	0.0393	29.465	504	0.05809	29.465	383	0.02082	29.465	435	0.03481
29.48	485	0.034	29.48	407	0.02815	29.48	408	0.04029	29.48	471	0.05429	29.48	376	0.02044	29.48	447	0.03577
29.495	442	0.03099	29.495	448	0.03099	29.495	371	0.03663	29.495	471	0.05429	29.495	351	0.01908	29.495	432	0.03457
29.51	452	0.03169	29.51	443	0.03064	29.51	364	0.03594	29.51	505	0.05821	29.51	387	0.02103	29.51	424	0.03393
29.525	485	0.034	29.525	430	0.02975	29.525	425	0.04197	29.525	473	0.05452	29.525	363	0.01973	29.525	443	0.03545
29.54	437	0.03064	29.54	426	0.02947	29.54	412	0.04068	29.54	468	0.05394	29.54	363	0.01973	29.54	447	0.03577
29.555	455	0.0319	29.555	424	0.02933	29.555	424	0.04187	29.555	490	0.05648	29.555	361	0.01962	29.555	435	0.03481
29.57	430	0.03015	29.57	416	0.02878	29.57	414	0.04088	29.57	454	0.05233	29.57	384	0.02087	29.57	438	0.03505
29.585	437	0.03064	29.585	439	0.03037	29.585	415	0.04098	29.585	461	0.05314	29.585	337	0.01832	29.585	424	0.03393
29.6	445	0.0312	29.6	441	0.03051	29.6	444	0.04384	29.6	514	0.05924	29.6	372	0.02022	29.6	445	0.03561
29.615	461	0.03232	29.615	423	0.02926	29.615	402	0.0397	29.615	477	0.05498	29.615	402	0.02185	29.615	422	0.03377
29.63	433	0.03036	29.63	436	0.03016	29.63	410	0.04049	29.63	472	0.0544	29.63	389	0.02114	29.63	413	0.03305
29.645	448	0.03141	29.645	456	0.03154	29.645	414	0.04088	29.645	489	0.05636	29.645	377	0.02049	29.645	409	0.03273
29.66	472	0.03309	29.66	449	0.03106	29.66	399	0.0394	29.66	516	0.05947	29.66	394	0.02141	29.66	456	0.03649
29.675	492	0.03449	29.675	443	0.03064	29.675	417	0.04118	29.675	463	0.05337	29.675	372	0.02022	29.675	444	0.03553
29.69	464	0.03253	29.69	412	0.0285	29.69	409	0.04039	29.69	465	0.0536	29.69	393	0.02136	29.69	455	0.03641
29.705	461	0.03232	29.705	423	0.02926	29.705	406	0.04009	29.705	464	0.05348	29.705	388	0.02109	29.705	420	0.03361
29.72	461	0.03232	29.72	465	0.03217	29.72	386	0.03812	29.72	463	0.05337	29.72	372	0.02022	29.72	417	0.03337
29.735	481	0.03372	29.735	429	0.02968	29.735	432	0.04266	29.735	493	0.05682	29.735	353	0.01919	29.735	390	0.03121
29.75	485	0.034	29.75	416	0.02878	29.75	425	0.04197	29.75	517	0.05959	29.75	356	0.01935	29.75	424	0.03393
29.765	472	0.03309	29.765	471	0.03258	29.765	425	0.04197	29.765	481	0.05544	29.765	377	0.02049	29.765	427	0.03417
29.78	481	0.03372	29.78	447	0.03092	29.78	385	0.03802	29.78	466	0.05371	29.78	359	0.01951	29.78	397	0.03177
29.795	461	0.03232	29.795	448	0.03099	29.795	402	0.0397	29.795	445	0.05129	29.795	373	0.02027	29.795	409	0.03273
29.81	464	0.03253	29.81	431	0.02981	29.81	453	0.04473	29.81	489	0.05636	29.81	381	0.02071	29.81	401	0.03209
29.825	480	0.03365	29.825	451	0.0312	29.825	414	0.04088	29.825	465	0.0536	29.825	357	0.0194	29.825	452	0.03617
29.84	475	0.0333	29.84	433	0.02995	29.84	407	0.04019	29.84	474	0.05463	29.84	378	0.02054	29.84	472	0.03778
29.855	465	0.0326	29.855	404	0.02795	29.855	407	0.04019	29.855	485	0.0559	29.855	363	0.01973	29.855	431	0.03449
29.87	449	0.03148	29.87	428	0.02961	29.87	370	0.03654	29.87	462	0.05325	29.87	367	0.01995	29.87	427	0.03417
29.885	455	0.0319	29.885	454	0.03141	29.885	375	0.03703	29.885	441	0.05083	29.885	375	0.02038	29.885	448	0.03585
29.9	436	0.03057	29.9	422	0.02919	29.9	414	0.04088	29.9	459	0.0529	29.9	419	0.02277	29.9	415	0.03321
29.915	457	0.03204	29.915	466	0.03224	29.915	404	0.03989	29.915	527	0.06074	29.915	367	0.01995	29.915	417	0.03337
29.93	428	0.03001	29.93	459	0.03175	29.93	430	0.04246	29.93	485	0.0559	29.93	380	0.02065	29.93	420	0.03361
29.945	446	0.03127	29.945	432	0.02988	29.945	436	0.04305	29.945	494	0.05694	29.945	398	0.02163	29.945	407	0.03257
29.96	483	0.03386	29.96	413	0.02857	29.96	423	0.04177	29.96	471	0.05429	29.96	415	0.02256	29.96	424	0.03393
29.975	491	0.03442	29.975	417	0.02885	29.975	381	0.03762	29.975	443	0.05106	29.975	381	0.02071	29.975	397	0.03177
29.99	474	0.03323	29.99	451	0.0312	29.99	409	0.04039	29.99	458	0.05279	29.99	355	0.01929	29.99	405	0.03241
30.005	459	0.03218	30.005	461	0.03189	30.005	360	0.03555	30.005	498	0.0574	30.005	417	0.02266	30.005	411	0.03289
30.02	474	0.03323	30.02	469	0.03244	30.02	410	0.04049	30.02	530	0.06109	30.02	402	0.02185	30.02	428	0.03425
30.035	476	0.03337	30.035	433	0.02995	30.035	410	0.04049	30.035	483	0.05567	30.035	371	0.02016	30.035	411	0.03289
30.05	435	0.0305	30.05	424	0.02933	30.05	415	0.04098	30.05	471	0.05429	30.05	375	0.02038	30.05	429	0.03433
30.065	434	0.03043	30.065	440	0.03044	30.065	414	0.04088	30.065	455	0.05244	30.065	358	0.01946	30.065	407	0.03257
30.08	459	0.03218	30.08	434	0.03002	30.08	421	0.04157	30.08	487	0.05613	30.08	360	0.01957	30.08	429	0.03433
30.095	459	0.03218	30.095	445	0.03078	30.095	432	0.04266	30.095	491	0.05659	30.095	342	0.01859	30.095	410	0.03281
30.11	453	0.03176	30.11	390	0.02698	30.11	440	0.04345	30.11	481	0.05544	30.11	375	0.02038	30.11	420	0.03361
30.125	445	0.0312	30.125	443	0.03064	30.125	414	0.04088	30.125	444	0.05118	30.125	367	0.01995	30.125	444	0.03553
30.14	426	0.02987	30.14	430	0.02975	30.14	396	0.0391	30.14	452	0.0521	30.14	359	0.01951	30.14	458	0.03665
30.155	457	0.03204	30.155	418	0.02892	30.155	394	0.03891	30.155	426	0.0491	30.155	338	0.01837	30.155	430	0.03441
30.17	455	0.0319	30.17	391	0.02705	30.17	400	0.0395	30.17	457	0.05267	30.17	401	0.02179	30.17	422	0.03377
30.185	427	0.02994	30.185	439	0.03037	30.185	416	0.04108	30.185	497	0.05728	30.185	397	0.02158	30.185	423	0.03385
30.2	426	0.02987	30.2	399	0.0276	30.2	399	0.0394	30.2	449	0.05175	30.2	366	0.01989	30.2	421	0.03369
30.215	436	0.03057	30.215	427	0.02954	30.215	418	0.04128	30.215	471	0.05429	30.215	362	0.01967	30.215	389	0.03113
30.23	426	0.02987	30.23	395	0.02732	30.23	417	0.04118	30.23	476	0.05486	30.23	367	0.01995	30.23	421	0.03369
30.245	420	0.02945	30.245	417	0.02885	30.245	388	0.03831	30.245	471	0.05429	30.245	372	0.02022	30.245	408	0.03265
30.26	433	0.03036	30.26	409	0.02829	30.26	397	0.0392	30.26	452	0.0521	30.26	345	0.01875	30.26	431	0.03449
30.275	455	0.0319	30.275	409	0.02829	30.275	417	0.04118	30.275	442	0.05095	30.275	334	0.01815	30.275	434	0.03473
30.29	429	0.03008	30.29	422	0.02919	30.29	396	0.0391	30.29	451	0.05198	30.29	342	0.01859	30.29	423	0.03385
30.305	435	0.0305	30.305	451	0.0312	30.305	417	0.04118	30.305	469	0.05406	30.305	366	0.01989	30.305	435	0.03481
30.32	419	0.02938	30.32	397	0.02746	30.32	386	0.03812	30.32	476	0.05486	30.32	381	0.02071	30.32	422	0.03377
30.335	428	0.03001	30.335	432	0.02988	30.335	389	0.03841	30.335	477	0.05498	30.335	368	0.02	30.335	418	0.03345
30.35	419	0.02938	30.35	409	0.02829	30.35	398	0.0393	30.35	481	0.05544	30.35	369	0.02006	30.35	436	0.03489
30.365	438	0.03071	30.365	440	0.03044	30.365	405	0.03999	30.365	441	0.05083	30.365	345	0.01875	30.365	408	0.03265
30.38	452	0.03169	30.38	410	0.02836	30.38	387	0.03821	30.38	433	0.04991	30.38	345	0.01875	30.38	436	0.03489
30.395	447	0.03134	30.395	424	0.02933	30.395	401	0.0396	30.395	460	0.05302	30.395	385	0.02093	30.395	458	0.03665
30.41	422	0.02959	30.41	401	0.02774	30.41	392	0.03871	30.41	459	0.0529	30.41	340	0.01848	30.41	453	0.03625
30.425	448	0.03141	30.425	406	0.02809	30.425	397	0.0392	30.425	475	0.05475	30.425	364	0.01978	30.425	436	0.03489
30.44	443	0.03106	30.44	423	0.02926	30.44	391	0.03861	30.44	487	0.05613	30.44	388	0.02109	30.44	416	0.03329
30.455	457	0.03204	30.455	421	0.02912	30.455	374	0.03693	30.455	474	0.05463	30.455	384	0.02087	30.455	442	0.03537
30.47	465	0.0326	30.47	444	0.03071	30.47	412	0.04068	30.47	463	0.05337	30.47	346	0.01881	30.47	476	0.0381
30.485	448	0.03141	30.485	408	0.02822	30.485	375	0.03703	30.485	451	0.05198	30.485	348	0.01891	30.485	441	0.03529
30.5	426	0.02987	30.5	410	0.02836	30.5	385	0.03802	30.5	449	0.05175	30.5	353	0.01919	30.5	413	0.03305
30.515	439	0.03078	30.515	439	0.03037	30.515	412	0.04068	30.515	433	0.04991	30.515	339	0.01842	30.515	456	0.03649
30.53	453	0.03176	30.53	462	0.03196	30.53	415	0.04098	30.53	497	0.05728	30.53	357	0.0194	30.53	447	0.03577
30.545	436	0.03057	30.545	414	0.02864	30.545	409	0.04039	30.545	480	0.05533	30.545	388	0.02109	30.545	426	0.03409
30.56	412	0.02889	30.56	399	0.0276	30.56	401	0.0396	30.56	468	0.05394	30.56	389	0.02114	30.56	399	0.03193
30.575	415	0.0291	30.575	420	0.02905	30.575	400	0.0395	30.575	473	0.05452	30.575	341	0.01853	30.575	427	0.03417
30.59	411	0.02882	30.59	409	0.02829	30.59	356	0.03515	30.59	494	0.05694	30.59	367	0.01995	30.59	461	0.03689
30.605	416	0.02917	30.605	390	0.02698	30.605	410	0.04049	30.605	459	0.0529	30.605	353	0.01919	30.605	475	0.03802
30.62	458	0.03211	30.62	421	0.02912	30.62	420	0.04147	30.62	501	0.05775	30.62	379	0.0206	30.62	416	0.03329
30.635	444	0.03113	30.635	417	0.02885	30.635	413	0.04078	30.635	492	0.05671	30.635	360	0.01957	30.635	417	0.03337
30.65	455	0.0319	30.65	395	0.02732	30.65	430	0.04246	30.65	501	0.05775	30.65	363	0.01973	30.65	449	0.03593
30.665	446	0.03127	30.665	420	0.02905	30.665	384	0.03792	30.665	471	0.05429	30.665	356	0.01935	30.665	452	0.03617
30.68	469	0.03288	30.68	403	0.02788	30.68	431	0.04256	30.68	494	0.05694	30.68	354	0.01924	30.68	397	0.03177
30.695	461	0.03232	30.695	425	0.0294	30.695	426	0.04207	30.695	493	0.05682	30.695	350	0.01902	30.695	406	0.03249
30.71	442	0.03099	30.71	414	0.02864	30.71	411	0.04058	30.71	459	0.0529	30.71	328	0.01783	30.71	420	0.03361
30.725	400	0.02804	30.725	423	0.02926	30.725	438	0.04325	30.725	489	0.05636	30.725	336	0.01826	30.725	426	0.03409
30.74	441	0.03092	30.74	416	0.02878	30.74	425	0.04197	30.74	487	0.05613	30.74	345	0.01875	30.74	410	0.03281
30.755	467	0.03274	30.755	454	0.03141	30.755	394	0.03891	30.755	462	0.05325	30.755	329	0.01788	30.755	396	0.03169
30.77	454	0.03183	30.77	475	0.03286	30.77	402	0.0397	30.77	459	0.0529	30.77	350	0.01902	30.77	429	0.03433
30.785	436	0.03057	30.785	447	0.03092	30.785	450	0.04444	30.785	494	0.05694	30.785	355	0.01929	30.785	442	0.03537
30.8	451	0.03162	30.8	442	0.03058	30.8	411	0.04058	30.8	454	0.05233	30.8	321	0.01745	30.8	434	0.03473
30.815	454	0.03183	30.815	413	0.02857	30.815	408	0.04029	30.815	458	0.05279	30.815	332	0.01804	30.815	433	0.03465
30.83	437	0.03064	30.83	398	0.02753	30.83	364	0.03594	30.83	491	0.05659	30.83	366	0.01989	30.83	431	0.03449
30.845	429	0.03008	30.845	463	0.03203	30.845	384	0.03792	30.845	463	0.05337	30.845	367	0.01995	30.845	448	0.03585
30.86	456	0.03197	30.86	425	0.0294	30.86	390	0.03851	30.86	472	0.0544	30.86	365	0.01984	30.86	430	0.03441
30.875	476	0.03337	30.875	439	0.03037	30.875	368	0.03634	30.875	474	0.05463	30.875	377	0.02049	30.875	413	0.03305
30.89	474	0.03323	30.89	442	0.03058	30.89	430	0.04246	30.89	481	0.05544	30.89	373	0.02027	30.89	413	0.03305
30.905	458	0.03211	30.905	435	0.03009	30.905	405	0.03999	30.905	454	0.05233	30.905	425	0.0231	30.905	447	0.03577
30.92	441	0.03092	30.92	441	0.03051	30.92	438	0.04325	30.92	455	0.05244	30.92	410	0.02228	30.92	442	0.03537
30.935	431	0.03022	30.935	406	0.02809	30.935	430	0.04246	30.935	472	0.0544	30.935	362	0.01967	30.935	420	0.03361
30.95	449	0.03148	30.95	432	0.02988	30.95	427	0.04216	30.95	480	0.05533	30.95	373	0.02027	30.95	460	0.03681
30.965	478	0.03351	30.965	414	0.02864	30.965	412	0.04068	30.965	478	0.05509	30.965	370	0.02011	30.965	459	0.03673
30.98	485	0.034	30.98	427	0.02954	30.98	439	0.04335	30.98	430	0.04956	30.98	391	0.02125	30.98	437	0.03497
30.995	482	0.03379	30.995	401	0.02774	30.995	400	0.0395	30.995	494	0.05694	30.995	366	0.01989	30.995	425	0.03401
31.01	480	0.03365	31.01	430	0.02975	31.01	395	0.039	31.01	487	0.05613	31.01	371	0.02016	31.01	416	0.03329
31.025	479	0.03358	31.025	438	0.0303	31.025	438	0.04325	31.025	485	0.0559	31.025	366	0.01989	31.025	442	0.03537
31.04	470	0.03295	31.04	453	0.03134	31.04	429	0.04236	31.04	476	0.05486	31.04	327	0.01777	31.04	411	0.03289
31.055	429	0.03008	31.055	428	0.02961	31.055	405	0.03999	31.055	498	0.0574	31.055	381	0.02071	31.055	436	0.03489
31.07	447	0.03134	31.07	430	0.02975	31.07	440	0.04345	31.07	490	0.05648	31.07	392	0.02131	31.07	452	0.03617
31.085	434	0.03043	31.085	381	0.02636	31.085	409	0.04039	31.085	464	0.05348	31.085	364	0.01978	31.085	437	0.03497
31.1	464	0.03253	31.1	447	0.03092	31.1	402	0.0397	31.1	457	0.05267	31.1	368	0.02	31.1	427	0.03417
31.115	484	0.03393	31.115	444	0.03071	31.115	407	0.04019	31.115	470	0.05417	31.115	372	0.02022	31.115	419	0.03353
31.13	478	0.03351	31.13	453	0.03134	31.13	433	0.04276	31.13	466	0.05371	31.13	361	0.01962	31.13	446	0.03569
31.145	427	0.02994	31.145	432	0.02988	31.145	407	0.04019	31.145	447	0.05152	31.145	350	0.01902	31.145	429	0.03433
31.16	422	0.02959	31.16	407	0.02815	31.16	442	0.04365	31.16	482	0.05556	31.16	348	0.01891	31.16	418	0.03345
31.175	446	0.03127	31.175	427	0.02954	31.175	413	0.04078	31.175	471	0.05429	31.175	360	0.01957	31.175	396	0.03169
31.19	460	0.03225	31.19	387	0.02677	31.19	404	0.03989	31.19	452	0.0521	31.19	349	0.01897	31.19	398	0.03185
31.205	467	0.03274	31.205	437	0.03023	31.205	393	0.03881	31.205	473	0.05452	31.205	356	0.01935	31.205	407	0.03257
31.22	447	0.03134	31.22	390	0.02698	31.22	437	0.04315	31.22	465	0.0536	31.22	347	0.01886	31.22	393	0.03145
31.235	452	0.03169	31.235	390	0.02698	31.235	406	0.04009	31.235	423	0.04876	31.235	369	0.02006	31.235	404	0.03233
31.25	453	0.03176	31.25	427	0.02954	31.25	402	0.0397	31.25	442	0.05095	31.25	377	0.02049	31.25	449	0.03593
31.265	436	0.03057	31.265	428	0.02961	31.265	407	0.04019	31.265	459	0.0529	31.265	347	0.01886	31.265	445	0.03561
31.28	397	0.02783	31.28	419	0.02898	31.28	414	0.04088	31.28	449	0.05175	31.28	341	0.01853	31.28	429	0.03433
31.295	448	0.03141	31.295	440	0.03044	31.295	404	0.03989	31.295	461	0.05314	31.295	361	0.01962	31.295	419	0.03353
31.31	474	0.03323	31.31	438	0.0303	31.31	427	0.04216	31.31	478	0.05509	31.31	367	0.01995	31.31	447	0.03577
31.325	453	0.03176	31.325	429	0.02968	31.325	392	0.03871	31.325	500	0.05763	31.325	347	0.01886	31.325	476	0.0381
31.34	441	0.03092	31.34	417	0.02885	31.34	415	0.04098	31.34	492	0.05671	31.34	373	0.02027	31.34	475	0.03802
31.355	438	0.03071	31.355	404	0.02795	31.355	410	0.04049	31.355	486	0.05602	31.355	359	0.01951	31.355	443	0.03545
31.37	443	0.03106	31.37	423	0.02926	31.37	407	0.04019	31.37	480	0.05533	31.37	358	0.01946	31.37	428	0.03425
31.385	458	0.03211	31.385	448	0.03099	31.385	413	0.04078	31.385	473	0.05452	31.385	350	0.01902	31.385	441	0.03529
31.4	442	0.03099	31.4	424	0.02933	31.4	410	0.04049	31.4	463	0.05337	31.4	371	0.02016	31.4	459	0.03673
31.415	458	0.03211	31.415	443	0.03064	31.415	415	0.04098	31.415	451	0.05198	31.415	374	0.02033	31.415	445	0.03561
31.43	502	0.0352	31.43	441	0.03051	31.43	428	0.04226	31.43	487	0.05613	31.43	350	0.01902	31.43	435	0.03481
31.445	477	0.03344	31.445	406	0.02809	31.445	437	0.04315	31.445	477	0.05498	31.445	367	0.01995	31.445	451	0.03609
31.46	454	0.03183	31.46	417	0.02885	31.46	436	0.04305	31.46	431	0.04968	31.46	355	0.01929	31.46	453	0.03625
31.475	456	0.03197	31.475	427	0.02954	31.475	441	0.04355	31.475	468	0.05394	31.475	357	0.0194	31.475	418	0.03345
31.49	472	0.03309	31.49	444	0.03071	31.49	422	0.04167	31.49	470	0.05417	31.49	359	0.01951	31.49	436	0.03489
31.505	474	0.03323	31.505	419	0.02898	31.505	448	0.04424	31.505	479	0.05521	31.505	384	0.02087	31.505	454	0.03633
31.52	463	0.03246	31.52	428	0.02961	31.52	419	0.04137	31.52	490	0.05648	31.52	375	0.02038	31.52	429	0.03433
31.535	461	0.03232	31.535	461	0.03189	31.535	418	0.04128	31.535	525	0.06051	31.535	369	0.02006	31.535	434	0.03473
31.55	474	0.03323	31.55	415	0.02871	31.55	407	0.04019	31.55	494	0.05694	31.55	371	0.02016	31.55	439	0.03513
31.565	470	0.03295	31.565	426	0.02947	31.565	418	0.04128	31.565	486	0.05602	31.565	388	0.02109	31.565	431	0.03449
31.58	469	0.03288	31.58	476	0.03293	31.58	427	0.04216	31.58	490	0.05648	31.58	361	0.01962	31.58	425	0.03401
31.595	476	0.03337	31.595	448	0.03099	31.595	442	0.04365	31.595	485	0.0559	31.595	340	0.01848	31.595	450	0.03601
31.61	450	0.03155	31.61	440	0.03044	31.61	397	0.0392	31.61	488	0.05625	31.61	359	0.01951	31.61	486	0.0389
31.625	419	0.02938	31.625	436	0.03016	31.625	421	0.04157	31.625	460	0.05302	31.625	396	0.02152	31.625	491	0.0393
31.64	469	0.03288	31.64	419	0.02898	31.64	408	0.04029	31.64	506	0.05832	31.64	360	0.01957	31.64	506	0.0405
31.655	483	0.03386	31.655	429	0.02968	31.655	392	0.03871	31.655	480	0.05533	31.655	355	0.01929	31.655	465	0.03721
31.67	504	0.03534	31.67	457	0.03161	31.67	440	0.04345	31.67	506	0.05832	31.67	373	0.02027	31.67	467	0.03737
31.685	486	0.03407	31.685	453	0.03134	31.685	412	0.04068	31.685	497	0.05728	31.685	377	0.02049	31.685	518	0.04146
31.7	513	0.03597	31.7	452	0.03127	31.7	392	0.03871	31.7	482	0.05556	31.7	390	0.0212	31.7	513	0.04106
31.715	514	0.03604	31.715	465	0.03217	31.715	422	0.04167	31.715	495	0.05705	31.715	379	0.0206	31.715	442	0.03537
31.73	516	0.03618	31.73	474	0.03279	31.73	452	0.04463	31.73	505	0.05821	31.73	366	0.01989	31.73	460	0.03681
31.745	466	0.03267	31.745	470	0.03251	31.745	451	0.04453	31.745	472	0.0544	31.745	413	0.02245	31.745	473	0.03786
31.76	487	0.03414	31.76	472	0.03265	31.76	469	0.04631	31.76	511	0.0589	31.76	403	0.0219	31.76	484	0.03874
31.775	522	0.0366	31.775	491	0.03397	31.775	476	0.047	31.775	518	0.0597	31.775	408	0.02218	31.775	496	0.0397
31.79	513	0.03597	31.79	504	0.03486	31.79	454	0.04483	31.79	493	0.05682	31.79	387	0.02103	31.79	502	0.04018
31.805	482	0.03379	31.805	507	0.03507	31.805	452	0.04463	31.805	490	0.05648	31.805	427	0.02321	31.805	529	0.04234
31.82	487	0.03414	31.82	525	0.03632	31.82	452	0.04463	31.82	445	0.05129	31.82	382	0.02076	31.82	480	0.03842
31.835	479	0.03358	31.835	511	0.03535	31.835	473	0.04671	31.835	507	0.05844	31.835	384	0.02087	31.835	483	0.03866
31.85	485	0.034	31.85	515	0.03563	31.85	463	0.04572	31.85	507	0.05844	31.85	386	0.02098	31.85	518	0.04146
31.865	479	0.03358	31.865	544	0.03763	31.865	464	0.04582	31.865	499	0.05751	31.865	409	0.02223	31.865	507	0.04058
31.88	554	0.03884	31.88	554	0.03832	31.88	477	0.0471	31.88	508	0.05855	31.88	397	0.02158	31.88	512	0.04098
31.895	549	0.03849	31.895	557	0.03853	31.895	466	0.04602	31.895	510	0.05878	31.895	414	0.0225	31.895	504	0.04034
31.91	544	0.03814	31.91	544	0.03763	31.91	479	0.0473	31.91	517	0.05959	31.91	388	0.02109	31.91	550	0.04402
31.925	570	0.03996	31.925	544	0.03763	31.925	493	0.04868	31.925	534	0.06155	31.925	410	0.02228	31.925	607	0.04858
31.94	548	0.03842	31.94	597	0.0413	31.94	463	0.04572	31.94	530	0.06109	31.94	416	0.02261	31.94	575	0.04602
[truncated: 549 more rows]

## Sheet: Figure2 & SI Figure S2
Figure 2. a CO2 conversion, b selectivity towards CH4, c methanation rate and d RWGS rate as a function of TOS for MgO-supported catalysts with various Ni:Fe ratios at 350 °C.
Time	conv co2	sel co	sel CH4	rate CO/molNi	rate CO/gM	rate CH4/molNi	rate CH4/gM	Time	conv co2	sel co	sel CH4	rate CO/molNi	rate CO/gM	rate CH4/molNi	rate CH4/gM	Time	conv co2	sel co	sel CH4	rate CO/molNi	rate CO/gM	rate CH4/molNi	rate CH4/gM	Time	conv co2	sel co	sel CH4	rate CO/molNi	rate CO/gM	rate CH4/molNi	rate CH4/gM	Time	conv co2	sel co	sel CH4	rate CO/molNi	rate CO/gM	rate CH4/molNi	rate CH4/gM	Time	conv co2	sel co	sel CH4	rate CO/molNi	rate CO/gM	rate CH4/molNi	rate CH4/gM
				molCO/s*molNi	molCO/s*gM	molCH4/s*molNi	molCH4/s*gM					molCO/s*molNi	molCO/s*gM	molCH4/s*molNi	molCH4/s*gM					molCO/s*molNi	molCO/s*gM	molCH4/s*molNi	molCH4/s*gM					molCO/s*molNi	molCO/s*gM	molCH4/s*molNi	molCH4/s*gM					molCO/s*molNi	molCO/s*gM	molCH4/s*molNi	molCH4/s*gM					molCO/s*molNi	molCO/s*gM	molCH4/s*molNi	molCH4/s*gM
	50Fe50Ni_MgO	50Fe50Ni_MgO	50Fe50Ni_MgO	50Fe50Ni_MgO	50Fe50Ni_MgO	50Fe50Ni_MgO	50Fe50Ni_MgO		Fe_MgO	Fe_MgO	Fe_MgO	Fe_MgO	Fe_MgO	Fe_MgO	Fe_MgO		66Fe33Ni_MgO	66Fe33Ni_MgO	66Fe33Ni_MgO	66Fe33Ni_MgO	66Fe33Ni_MgO	66Fe33Ni_MgO	66Fe33Ni_MgO		33Fe66Ni_MgO	33Fe66Ni_MgO	33Fe66Ni_MgO	33Fe66Ni_MgO	33Fe66Ni_MgO	33Fe66Ni_MgO	33Fe66Ni_MgO		Ni_MgO	Ni_MgO	Ni_MgO	Ni_MgO	Ni_MgO	Ni_MgO	Ni_MgO		17Fe83Ni_MgO	17Fe83Ni_MgO	17Fe83Ni_MgO	17Fe83Ni_MgO	17Fe83Ni_MgO	17Fe83Ni_MgO	17Fe83Ni_MgO
59			--	0.01911		0.0036		2690	0.02192	--	--	0	0	0	0	2792	0.08261	0.96246	0.03754	0.0096	0.000165549	0.00037451	6.45707e-06	2380	0.18676	0.84279	0.15721	0.02261	0.000389909	0.00422	7.27332e-05	2739	0.09557	0.89205	0.10795	0.01154	0.000198884	0.0014	2.40675e-05	304			--	0		0
59			--	0.01911		0.0036		2690	0.02192	--	--	0	0	0	0	2792	0.08261	0.96246	0.03754	0.0096	0.000165549	0.00037451	6.45707e-06	2380	0.18676	0.84279	0.15721	0.02261	0.000389909	0.00422	7.27332e-05	2739	0.09557	0.89205	0.10795	0.01154	0.000198884	0.0014	2.40675e-05	304			--	0		0
203			--	0.01875		0.00327		2836	0.01589	--	--	0	0	0	0	2935	0.08309	0.96406	0.03594	0.00945	0.000162936	0.00035233	6.07465e-06	2523	0.18764	0.84511	0.15489	0.0224	0.000386238	0.00411	7.07909e-05	2885	0.09561	0.89289	0.10711	0.01154	0.000199049	0.00138	2.38777e-05	447			--	0		0
346	0.15175	0.85931	0.14069	0.01896	0.000326878	0.0031	5.3516e-05	2980	0.01924	--	--	0	0	0	0	3078	0.08169	0.96474	0.03526	0.00941	0.000162237	0.000343957	5.93029e-06	2668	0.18619	0.84819	0.15181	0.0224	0.000386288	0.00401	6.91399e-05	3028	0.0961	0.89348	0.10652	0.01142	0.000196876	0.00136	2.34722e-05	590	0.23625	0.70704	0.29296	0.02323	0.000400547	0.00963	0.000165968
494	0.15457	0.86346	0.13654	0.01914	0.000330073	0.00303	5.21968e-05	3124	0.01919	--	--	0	0	0	0	3221	0.08158	0.96618	0.03382	0.00934	0.000161015	0.00032687	5.63568e-06	2814	0.18598	0.85009	0.14991	0.0225	0.000387886	0.00397	6.84015e-05	3172	0.09687	0.89323	0.10677	0.01156	0.000199341	0.00138	2.38271e-05	733	0.23078	0.72373	0.27627	0.02343	0.000403911	0.00894	0.000154183
638	0.15395	0.8682	0.1318	0.01956	0.000337279	0.00297	5.11998e-05	3268	0.02102	--	--	0	0	0	0	3364	0.0822	0.96696	0.03304	0.00928	0.00015999	0.000317106	5.46734e-06	2957	0.18551	0.85288	0.14712	0.02259	0.000389482	0.0039	6.71837e-05	3316	0.09619	0.89455	0.10545	0.0115	0.000198216	0.00136	2.33646e-05	876	0.22949	0.73434	0.26566	0.02366	0.000407883	0.00856	0.000147557
781	0.15471	0.87259	0.12741	0.01953	0.000336717	0.00285	4.91649e-05	3413	0.01904	1	0	0.000160541	2.76795e-06	0	0	3508	0.0801	0.96812	0.03188	0.00925	0.000159502	0.000304635	5.25232e-06	3100	0.18516	0.85506	0.14494	0.02217	0.000382261	0.00376	6.47982e-05	3459	0.09658	0.89401	0.10599	0.01146	0.000197539	0.00136	2.34185e-05	1019	0.22788	0.74146	0.25854	0.02354	0.000405881	0.00821	0.000141527
923	0.15472	0.87705	0.12295	0.01956	0.000337193	0.00274	4.72684e-05	3558	0.02014	1	0	0.000120114	2.07092e-06	0	0	3652	0.08112	0.96896	0.03104	0.00917	0.000158047	0.000293691	5.06364e-06	3245	0.18315	0.8558	0.1442	0.02242	0.000386529	0.00378	6.51273e-05	3601	0.09596	0.89604	0.10396	0.01162	0.000200296	0.00135	2.32395e-05	1163	0.22824	0.74926	0.25074	0.02356	0.000406187	0.00788	0.00013593
1066	0.15218	0.88144	0.11856	0.01963	0.000338368	0.00264	4.55114e-05	3701	0.02036	1	0	0.000165656	2.85614e-06	0	0	3797	0.07898	0.96968	0.03032	0.00904	0.000155934	0.000282768	4.87531e-06	3389	0.18276	0.85861	0.14139	0.02205	0.000380142	0.00363	6.25982e-05	3746	0.09683	0.89508	0.10492	0.01159	0.000199845	0.00136	2.3425e-05	1306	0.22853	0.75618	0.24382	0.024	0.000413789	0.00774	0.000133419
1210	0.1538	0.88486	0.11514	0.01948	0.000335915	0.00254	4.37122e-05	3845	0.02051	1	0	0.000179347	3.09218e-06	0	0	3942	0.07898	0.96868	0.03132	0.00902	0.000155515	0.000291618	5.0279e-06	3535	0.18232	0.85959	0.14041	0.02204	0.000380017	0.0036	6.20746e-05	3888	0.0963	0.89554	0.10446	0.01162	0.000200277	0.00135	2.33605e-05	1449	0.22633	0.76005	0.23995	0.0238	0.0004104	0.00751	0.000129567
1353	0.15056	0.88771	0.11229	0.01937	0.000333936	0.00245	4.22426e-05	3988	0.02093	1	0	0.00013065	2.25259e-06	0	0	4085	0.07905	0.97095	0.02905	0.00878	0.000151319	0.000262619	4.52792e-06	3680	0.1816	0.86234	0.13766	0.02228	0.000384185	0.00356	6.13286e-05	4032	0.09635	0.8969	0.1031	0.01159	0.000199766	0.00133	2.29638e-05	1593	0.22599	0.76541	0.23459	0.02379	0.000410181	0.00729	0.000125715
1496	0.14992	0.89118	0.10882	0.01921	0.000331238	0.00235	4.04464e-05	4134	0.01895	1	0	0.000135824	2.34179e-06	0	0	4229	0.07798	0.97024	0.02976	0.00884	0.000152499	0.000271286	4.67734e-06	3825	0.18131	0.86411	0.13589	0.02215	0.000381835	0.00348	6.00474e-05	4175	0.09776	0.89714	0.10286	0.01142	0.000196846	0.00131	2.25689e-05	1736	0.22604	0.76937	0.23063	0.02387	0.000411498	0.00715	0.000123352
1639	0.14817	0.89348	0.10652	0.01908	0.000328893	0.00227	3.92124e-05	4278	0.02073	1	0	0.000148262	2.55625e-06	0	0	4371	0.07832	0.97202	0.02798	0.00875	0.00015092	0.000251989	4.34465e-06	3969	0.18046	0.86498	0.13502	0.02206	0.000380348	0.00344	5.93711e-05	4318	0.09454	0.89718	0.10282	0.01162	0.000200325	0.00133	2.29582e-05	1881	0.22378	0.77292	0.22708	0.02415	0.000416325	0.00709	0.000122317
1782	0.14767	0.89689	0.10311	0.01904	0.000328288	0.00219	3.77411e-05	4422	0.02012	1	0	0.000160943	2.77488e-06	0	0	4514	0.07631	0.97299	0.02701	0.00883	0.000152191	0.000245062	4.22521e-06	4113	0.17914	0.86699	0.13301	0.02216	0.00038214	0.0034	5.86256e-05	4464	0.0964	0.89663	0.10337	0.01154	0.000198888	0.00133	2.29296e-05	2024	0.22416	0.77583	0.22417	0.0239	0.00041214	0.00691	0.000119087
1925	0.14648	0.89892	0.10108	0.01868	0.000322031	0.0021	3.62105e-05	4568	0.02127	1	0	0.000204087	3.51875e-06	0	0	4658	0.07699	0.97224	0.02776	0.00859	0.000148037	0.000245116	4.22615e-06	4260	0.17867	0.86809	0.13191	0.02216	0.000382149	0.00337	5.80689e-05	4609	0.09557	0.89625	0.10375	0.01146	0.000197553	0.00133	2.28699e-05	2167	0.22243	0.77901	0.22099	0.02389	0.000411862	0.00678	0.000116834
2068	0.14496	0.90058	0.09942	0.01896	0.000326827	0.00209	3.60814e-05	4713	0.02145	1	0	0.000196746	3.39217e-06	0	0	4801	0.07567	0.97285	0.02715	0.00856	0.000147617	0.000238912	4.11917e-06	4404	0.17838	0.86922	0.13078	0.02169	0.000373935	0.00326	5.62627e-05	4753	0.09704	0.89727	0.10273	0.01162	0.000200374	0.00133	2.2942e-05	2310	0.22244	0.78201	0.21799	0.02408	0.000415247	0.00671	0.000115754
2211	0.14442	0.90253	0.09747	0.01868	0.00032211	0.00202	3.4786e-05	4858	0.02028	1	0	0.000213153	3.67506e-06	0	0	4945	0.0757	0.97373	0.02627	0.00855	0.000147458	0.00023077	3.9788e-06	4547	0.17806	0.87091	0.12909	0.02189	0.00037748	0.00325	5.59523e-05	4896	0.09651	0.89646	0.10354	0.01155	0.00019914	0.00133	2.29995e-05	2455	0.22126	0.78437	0.21563	0.02372	0.000409022	0.00652	0.000112446
2354	0.1442	0.90458	0.09542	0.01884	0.000324866	0.00199	3.42688e-05	5003	0.01991	1	0	0.0001575	2.71551e-06	0	0	5089	0.07558	0.97447	0.02553	0.00846	0.00014581	0.000221566	3.8201e-06	4692	0.1775	0.87156	0.12844	0.02181	0.000375972	0.00321	5.5408e-05	5039	0.09626	0.89814	0.10186	0.01149	0.000198121	0.0013	2.24704e-05	2598	0.22047	0.78723	0.21277	0.0237	0.000408687	0.00641	0.000110456
2497	0.14177	0.90649	0.09351	0.01853	0.000319562	0.00191	3.29653e-05	5145	0.01984	1	0	0.00020254	3.49207e-06	0	0	5232	0.07445	0.97533	0.02467	0.00848	0.000146133	0.000214358	3.69584e-06	4835	0.17708	0.87297	0.12703	0.02171	0.000374235	0.00316	5.44554e-05	5182	0.09618	0.899	0.101	0.01159	0.000199851	0.0013	2.24539e-05	2741	0.21941	0.78939	0.21061	0.02377	0.000409755	0.00634	0.000109324
2641	0.14089	0.90854	0.09146	0.01851	0.000319103	0.00186	3.21216e-05	5290	0.02116	1	0	0.000153968	2.65462e-06	0	0	5376	0.07293	0.97349	0.02651	0.00834	0.00014378	0.000227116	3.91579e-06	4978	0.17474	0.87338	0.12662	0.02146	0.000369935	0.00311	5.36326e-05	5326	0.09586	0.89767	0.10233	0.0115	0.000198205	0.00131	2.25954e-05	2884	0.22007	0.79189	0.20811	0.02392	0.000412403	0.00629	0.000108377
2786	0.14062	0.9097	0.0903	0.01834	0.000316283	0.00182	3.13967e-05	5435	0.01994	1	0	0.000182435	3.14544e-06	0	0	5519	0.07271	0.97596	0.02404	0.00835	0.000143937	0.000205638	3.54548e-06	5122	0.17543	0.87555	0.12445	0.02173	0.000374599	0.00309	5.3244e-05	5470	0.09625	0.89776	0.10224	0.01153	0.000198863	0.00131	2.26463e-05	3029	0.21782	0.79287	0.20713	0.02378	0.000409917	0.00621	0.000107089
2932	0.13974	0.91156	0.08844	0.0182	0.000313869	0.00177	3.04517e-05	5579	0.02116	1	0	0.000203509	3.50877e-06	0	0	5663	0.0738	0.97603	0.02397	0.00827	0.000142664	0.000203183	3.50316e-06	5266	0.17432	0.87666	0.12334	0.0214	0.000368914	0.00301	5.19059e-05	5616	0.09631	0.89901	0.10099	0.01151	0.000198508	0.00129	2.22981e-05	3172	0.21807	0.79553	0.20447	0.02376	0.00040972	0.00611	0.000105305
3077	0.13822	0.91304	0.08696	0.0182	0.000313789	0.00173	2.98875e-05	5725	0.02176	1	0	0.000169501	2.92243e-06	0	0	5807	0.07408	0.97517	0.02483	0.00825	0.000142239	0.000210083	3.62213e-06	5408	0.1735	0.87761	0.12239	0.02039	0.000351627	0.00284	4.90365e-05	5764	0.09526	0.89872	0.10128	0.01154	0.000198943	0.0013	2.24201e-05	3316	0.21742	0.7974	0.2026	0.02388	0.000411642	0.00607	0.000104589
3220	0.13826	0.91377	0.08623	0.01808	0.000311684	0.00171	2.94119e-05	5869	0.01975	1	0	0.00015444	2.66276e-06	0	0	5951	0.07238	0.97571	0.02429	0.00813	0.000140098	0.000202276	3.48752e-06	5553	0.17215	0.87887	0.12113	0.02138	0.000368663	0.00295	5.08124e-05	5911	0.0961	0.89903	0.10097	0.01157	0.000199401	0.0013	2.23942e-05	3460	0.21731	0.79902	0.20098	0.0237	0.000408573	0.00596	0.000102769
3363	0.13581	0.91644	0.08356	0.01794	0.000309308	0.00164	2.82025e-05	6014	0.02103	1	0	0.000147542	2.54382e-06	0	0	6094	0.07334	0.97784	0.02216	0.00812	0.000140058	0.00018405	3.17328e-06	5696	0.17169	0.88002	0.11998	0.02129	0.000367032	0.0029	5.00386e-05	6057	0.09546	0.89869	0.10131	0.0115	0.000198254	0.0013	2.23501e-05	3603	0.21626	0.80103	0.19897	0.02356	0.000406123	0.00585	0.000100875
3506	0.13681	0.91767	0.08233	0.01769	0.000305056	0.00159	2.7368e-05	6160	0.0199	1	0	0.000170021	2.93139e-06	0	0	6237	0.07233	0.97578	0.02422	0.00814	0.000140318	0.000202038	3.48341e-06	5839	0.17114	0.88129	0.11871	0.02147	0.000370238	0.00289	4.98713e-05	6204	0.09647	0.89923	0.10077	0.01161	0.000200193	0.0013	2.24329e-05	3746	0.21592	0.80224	0.19776	0.02351	0.000405359	0.0058	9.99271e-05
3649	0.1349	0.91894	0.08106	0.01779	0.000306786	0.00157	2.70633e-05	6304	0.02102	1	0	0.000161303	2.78109e-06	0	0	6381	0.07193	0.97562	0.02438	0.00802	0.000138348	0.000200537	3.45754e-06	5983	0.17049	0.88086	0.11914	0.02154	0.000371457	0.00291	5.02403e-05	6351	0.09458	0.89919	0.10081	0.01144	0.000197263	0.00128	2.21149e-05	3890	0.21507	0.80361	0.19639	0.02352	0.000405584	0.00575	9.9119e-05
3793	0.1354	0.91992	0.08008	0.01756	0.000302809	0.00153	2.63589e-05	6448	0.02126	1	0	0.000156625	2.70044e-06	0	0	6524	0.07074	0.9776	0.0224	0.00808	0.000139374	0.00018525	3.19397e-06	6127	0.16948	0.88301	0.11699	0.02119	0.000365315	0.00281	4.83998e-05	6495	0.09521	0.89988	0.10012	0.01142	0.000196842	0.00127	2.19006e-05	4033	0.21533	0.80505	0.19495	0.02295	0.00039577	0.00556	9.58365e-05
3937	0.13397	0.92122	0.07878	0.01753	0.000302217	0.0015	2.58464e-05	6593	0.02083	1	0	0.000154169	2.65808e-06	0	0	6667	0.07123	0.97842	0.02158	0.00793	0.000136715	0.000174927	3.01599e-06	6270	0.17062	0.88397	0.11603	0.02103	0.00036255	0.00276	4.75889e-05	6640	0.09527	0.89943	0.10057	0.01157	0.000199542	0.00129	2.23129e-05	4175	0.21356	0.80561	0.19439	0.02296	0.000395929	0.00554	9.55342e-05
4082	0.13327	0.92278	0.07722	0.01761	0.000303661	0.00147	2.54117e-05	6739	0.0207	1	0	0.000213413	3.67954e-06	0	0	6811	0.07062	0.97714	0.02286	0.00799	0.00013775	0.000186887	3.22219e-06	6413	0.16892	0.88459	0.11541	0.02094	0.000361121	0.00273	4.71154e-05	6785	0.09546	0.89907	0.10093	0.01148	0.000197947	0.00129	2.22212e-05	4319	0.21422	0.80799	0.19201	0.02331	0.000401814	0.00554	9.54845e-05
4228	0.13204	0.92299	0.07701	0.01732	0.000298682	0.00145	2.49217e-05	6883	0.02037	1	0	0.000216101	3.72587e-06	0	0	6955	0.07015	0.97807	0.02193	0.0079	0.0001362	0.000177109	3.05361e-06	6558	0.16961	0.88468	0.11532	0.02118	0.000365103	0.00276	4.75903e-05	6928	0.09518	0.90108	0.09892	0.01117	0.000192636	0.00123	2.11482e-05	4464	0.21412	0.80857	0.19143	0.02352	0.000405544	0.00557	9.6011e-05
4371	0.13139	0.92411	0.07589	0.01741	0.000300132	0.00143	2.46473e-05	7025	0.02211	1	0	0.000149007	2.56908e-06	0	0	7099	0.07059	0.9779	0.0221	0.00776	0.000133818	0.000175398	3.0241e-06	6701	0.16747	0.88591	0.11409	0.02103	0.00036256	0.00271	4.66931e-05	7072	0.0962	0.89972	0.10028	0.01149	0.000198062	0.00128	2.2075e-05	4608	0.21305	0.80993	0.19007	0.02352	0.000405484	0.00552	9.51571e-05
4515	0.12932	0.92525	0.07475	0.01729	0.000298105	0.0014	2.40829e-05	7171	0.01914	1	0	0.000157854	2.72162e-06	0	0	7242	0.06964	0.97871	0.02129	0.00782	0.000134873	0.000170168	2.93393e-06	6846	0.16769	0.88718	0.11282	0.02106	0.000363065	0.00268	4.61702e-05	7217	0.09652	0.89946	0.10054	0.0115	0.000198231	0.00129	2.21572e-05	4751	0.21276	0.81124	0.18876	0.02327	0.000401193	0.00541	9.33512e-05
4660	0.13006	0.92689	0.07311	0.01711	0.000295032	0.00135	2.32703e-05	7316	0.02068	1	0	0.000164835	2.84198e-06	0	0	7386	0.07043	0.97901	0.02099	0.00769	0.00013264	0.000164945	2.84388e-06	6990	0.16655	0.88823	0.11177	0.02105	0.000362916	0.00265	4.56672e-05	7362	0.09451	0.89975	0.10025	0.0115	0.000198298	0.00128	2.20932e-05	4895	0.21222	0.8118	0.1882	0.02341	0.000403629	0.00543	9.35706e-05
4804	0.12868	0.92799	0.07201	0.01696	0.000292416	0.00132	2.26893e-05	7461	0.0205	1	0	0.000191153	3.29574e-06	0	0	7530	0.0693	0.97846	0.02154	0.00774	0.000133501	0.00017042	2.93828e-06	7133	0.16569	0.88706	0.11294	0.02086	0.000359681	0.00266	4.57949e-05	7505	0.09661	0.90115	0.09885	0.01146	0.000197604	0.00126	2.1675e-05	5040	0.21156	0.81279	0.18721	0.02352	0.000405438	0.00542	9.33837e-05
4947	0.12893	0.92833	0.07167	0.01699	0.00029288	0.00131	2.26111e-05	7606	0.02063	1	0	0.000192494	3.31886e-06	0	0	7673	0.06866	0.97767	0.02233	0.00769	0.000132529	0.000175602	3.02763e-06	7279	0.16546	0.88951	0.11049	0.02085	0.000359407	0.00259	4.46455e-05	7650	0.09522	0.89994	0.10006	0.01146	0.000197658	0.00127	2.19765e-05	5184	0.21147	0.81465	0.18535	0.02331	0.000401916	0.0053	9.14452e-05
5092	0.12704	0.92962	0.07038	0.01691	0.000291634	0.00128	2.2079e-05	7750	0.02133	1	0	0.000164528	2.83669e-06	0	0	7817	0.0689	0.9786	0.0214	0.00765	0.000131814	0.000167147	2.88185e-06	7422	0.16507	0.89005	0.10995	0.02099	0.000361844	0.00259	4.46981e-05	7793	0.09583	0.90112	0.09888	0.01146	0.000197655	0.00126	2.16878e-05	5329	0.21089	0.8148	0.1852	0.0235	0.000405119	0.00534	9.20838e-05
5235	0.12726	0.93037	0.06963	0.01668	0.000287521	0.00125	2.15191e-05	7896	0.01984	1	0	0.000161079	2.77722e-06	0	0	7960	0.06837	0.98017	0.01983	0.00757	0.000130547	0.000153163	2.64074e-06	7568	0.16494	0.89062	0.10938	0.02068	0.000356515	0.00254	4.37826e-05	7937	0.09618	0.90107	0.09893	0.01151	0.000198423	0.00126	2.17846e-05	5472	0.21132	0.81601	0.18399	0.02314	0.000398974	0.00522	8.99604e-05
5378	0.12604	0.93053	0.06947	0.01665	0.00028707	0.00124	2.14329e-05	8039	0.02155	1	0	0.000147719	2.54688e-06	0	0	8103	0.06714	0.98023	0.01977	0.00759	0.000130823	0.000153033	2.63851e-06	7711	0.16446	0.89199	0.10801	0.02078	0.000358347	0.00252	4.33931e-05	8081	0.09503	0.89964	0.10036	0.01153	0.000198766	0.00129	2.21732e-05	5616	0.20963	0.81705	0.18295	0.02308	0.000397901	0.00517	8.90972e-05
5520	0.12623	0.9319	0.0681	0.01674	0.000288687	0.00122	2.10965e-05	8183	0.02061	1	0	0.000166932	2.87813e-06	0	0	8246	0.06693	0.9797	0.0203	0.00758	0.000130722	0.000157077	2.70822e-06	7855	0.1637	0.89257	0.10743	0.02074	0.000357511	0.0025	4.30308e-05	8227	0.09586	0.90243	0.09757	0.01153	0.000198844	0.00125	2.1498e-05	5759	0.21087	0.8179	0.1821	0.02314	0.000398989	0.00515	8.88335e-05
5664	0.12488	0.93245	0.06755	0.01646	0.000283872	0.00119	2.05636e-05	8327	0.02077	1	0	0.000144199	2.48619e-06	0	0	8391	0.06827	0.97953	0.02047	0.00743	0.000128168	0.000155324	2.67801e-06	8000	0.16344	0.89291	0.10709	0.02073	0.000357439	0.00249	4.28703e-05	8370	0.09472	0.90159	0.09841	0.01136	0.000195897	0.00124	2.1382e-05	5907	0.20915	0.81854	0.18146	0.02313	0.000398874	0.00513	8.84256e-05
5809	0.12378	0.93359	0.06641	0.01645	0.00028365	0.00117	2.01757e-05	8470	0.02021	1	0	0.000207926	3.58494e-06	0	0	8536	0.06703	0.97905	0.02095	0.00743	0.00012813	0.00015904	2.74208e-06	8144	0.16242	0.89376	0.10624	0.02044	0.000352366	0.00243	4.18836e-05	8513	0.09619	0.90139	0.09861	0.01145	0.000197474	0.00125	2.1603e-05	6053	0.20864	0.81997	0.18003	0.0229	0.000394846	0.00503	8.66912e-05
5952	0.1247	0.93406	0.06594	0.0165	0.000284554	0.00117	2.00897e-05	8614	0.02014	1	0	0.000160358	2.7648e-06	0	0	8680	0.06728	0.98006	0.01994	0.00742	0.000127899	0.000150913	2.60194e-06	8287	0.1621	0.89468	0.10532	0.02044	0.000352328	0.00241	4.1474e-05	8657	0.09463	0.90087	0.09913	0.01147	0.000197814	0.00126	2.17667e-05	6198	0.20812	0.82139	0.17861	0.02312	0.000398586	0.00503	8.66748e-05
6095	0.12325	0.93495	0.06505	0.01637	0.000282221	0.00114	1.96366e-05	8758	0.02111	1	0	0.000145557	2.50961e-06	0	0	8824	0.06723	0.97984	0.02016	0.00748	0.000128957	0.000153858	2.65273e-06	8434	0.16154	0.89537	0.10463	0.02035	0.00035093	0.00238	4.10085e-05	8801	0.09649	0.90253	0.09747	0.01136	0.000195858	0.00123	2.11512e-05	6341	0.20991	0.82203	0.17797	0.02295	0.000395738	0.00497	8.56774e-05
[truncated: 821 more rows]

## Sheet: Figure3
Figure 3. Reaction rates of both methanation and RWGS after 16 h test for different Fe loadings in Ni,(Fe)/MgO catalysts.
[truncated: 7 more rows]

[truncated: 14 more sheets: Figure4a, Figure4b, Figure4c, Figure6& SI Figure S2, Figure7, Figure8, Figure9, Figure10, Figure11, Figure12a & SI Figure S4, Figure12b & SI Figure S5, Figure12c & SI Figure S6, SI Figure S1, SI Figure S3]
